# Supplementary material for: Regioselective synthesis of 2H-indazoles through Ga/Al- and Al-mediated direct alkylation reactions of indazoles
Source: Royal Society of Chemistry journal article supplement (doi:10.1039/c5ob01747e), 2015-01-01

## Supplementary/Supporting Information:

### Regioselective Synthesis of 2*H*-Indazoles through Ga/Al- and Al-Mediated

### Direct Alkylation Reactions of Indazoles

Mei-Huey Lin,\* Han-Jun Liu, Wei-Cheng Lin, Chung-Kai Kuo, Tsung-Hsun Chuang

*Department of Chemistry, National Changhua University of Education, Changhua, Taiwan 50007*

[mhlin@cc.ncue.edu.tw](mailto:mhlin@cc.ncue.edu.tw)

#### Table of Contents:

|                                                                                    |                     |
|------------------------------------------------------------------------------------|---------------------|
| <b>I. General Information and Materials.</b>                                       | <b>Page S1</b>      |
| <b>II. Experimental Section: (experimental details and characterization data).</b> | <b>Page S2-S9</b>   |
| <b>III. Copies of <sup>1</sup>H and <sup>13</sup>C NMR spectra.</b>                | <b>Page S10-S98</b> |
| <b>(Page S14-S16 compound 2a' spectra for comparison with compound 2a)</b>         |                     |

#### I. General Information and Materials:

All commercially available chemicals were used without further purification. TLC analyses were run on a TLC glass plate (Silica gel 60 F254) and were visualized using UV and a solution of phosphomolybdic acid in ethanol (5 wt%) or *p*-anisaldehyde stain. Flash chromatography was performed using silica gel (70-230 mesh). <sup>1</sup>H spectra were recorded on a 300 MHz spectrometer. <sup>13</sup>C NMR spectra were recorded on a 75 MHz with complete proton decoupling spectrometer. Chemical shifts are reported relative to CHCl<sub>3</sub> [ $\delta_{\text{H}}$  7.24,  $\delta_{\text{C}}$  (central line) 77.0]. Mass spectra were recorded under electron spray interface (ESI) conditions and high-resolution mass spectra were recorded by electron impact ionization with magnetic sector analyzer.

## II. Experimental Section:

**General procedure for *N*-2 alkylation of indazole:** A 25-mL flask was charged with gallium metal (104.6 mg, 1.5 mmol) in DMF/H<sub>2</sub>O (0.75 mL/0.25 mL). To the solution, aluminium powder (325 mesh, 41.0 mg, 1.5 mmol), alkyl halide (3.0 mmol) and indazole (118.4 mg, 1.0 mmol) was successively added. The flask was sealed with a septum and heated to 55 °C for 19 h and cooled to rt. Et<sub>2</sub>O (10 mL) and water (2 mL) was then added to the reaction and the mixture was transferred to a separatory funnel. The aqueous layer was back extracted with Et<sub>2</sub>O (5 mL x 2). The combined organic layers were washed with 1*N* HCl aqueous solution (10 mL) and dried over MgSO<sub>4</sub>, and concentrated in a rotary evaporator. The residue was purified by silica-gel chromatography. Procedure for purification of compounds **2c**, **2f-j**, **2q** and **2r** is as follows: The residue was dissolved in CH<sub>2</sub>Cl<sub>2</sub> (2 mL), DMAP (12.0 mg, 0.1 mmol), triethylamine (0.21 mL, 1.5 mmol) and Ac<sub>2</sub>O (0.14 mL, 1.5 mmol) was added and stirred at rt for 2 h. 1*N* HCl aqueous solution (3 mL) and CH<sub>2</sub>Cl<sub>2</sub> (10 mL) was then added to the reaction and the mixture was transferred to a separatory funnel. The aqueous layer was back extracted with CH<sub>2</sub>Cl<sub>2</sub> (5 mL x 3). The combined organic layers were dried over MgSO<sub>4</sub>, and concentrated in a rotary evaporator. The residue was purified by silica-gel chromatography to give **2c**, **2f-j**, **2q** and **2r**.

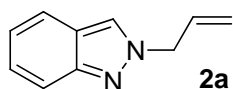

**2-Allyl-2*H*-indazole (2a)**<sup>1</sup>: 139 mg, 88% yield; An oil; TLC (EtOAc/hexanes (1:4))  $R_f = 0.25$ ; <sup>1</sup>H NMR (300 MHz, CDCl<sub>3</sub>)  $\delta$  5.00 (d,  $J = 6.0$  Hz, 2 H), 5.24-5.33 (m, 2 H), 6.03-6.16 (m, 1 H), 7.06 (t,  $J = 8.4$  Hz, 1 H), 7.26 (t,  $J = 8.4$  Hz, 1 H), 7.60 (d,  $J = 8.4$  Hz, 1 H), 7.70 (d,  $J = 8.4$  Hz, 1 H), 7.91 (s, 1 H); <sup>13</sup>C NMR (75 MHz, CDCl<sub>3</sub>)  $\delta$  56.0 (CH<sub>2</sub>), 117.3 (CH), 119.3 (CH<sub>2</sub>), 120.0 (CH), 121.6 (CH), 121.8 (C), 122.4 (CH), 125.8 (CH), 132.1 (CH), 148.8 (C); IR (neat) 3071, 1630, 1521 cm<sup>-1</sup>; EI-MS  $m/z$  (rel intensity) 158 (M<sup>+</sup>, 100), 157 (86), 131 (72), 118 (20); HRMS [M]<sup>+</sup> for C<sub>10</sub>H<sub>10</sub>N<sub>2</sub>: 158.0844, found 158.0853.

---

<sup>1</sup> Genung, N. E.; Wei, L.; Aspnes, G. E. *Org. Lett.* **2014**, *16*, 3114.

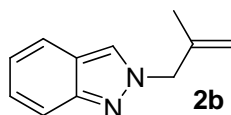

**2-(2-Methylallyl)-2H-indazole (2b):** 145 mg, 84% yield; Solid, mp 41.7-42.3 °C; TLC (EtOAc/hexanes (1:4))  $R_f = 0.38$ ;  $^1\text{H NMR}$  (300 MHz,  $\text{CDCl}_3$ )  $\delta$  1.64 (s, 3 H), 4.86-4.98 (m, 3 H), 4.98 (d,  $J = 0.6$  Hz, 1 H), 7.04 (ddd,  $J = 8.5, 6.9, 0.9$  Hz, 1 H), 7.24 (ddd,  $J = 8.5, 6.9, 0.9$  Hz, 1 H), 7.61 (d,  $J = 8.5$  Hz, 1 H), 7.70 (d,  $J = 8.5$  Hz, 1 H), 7.86 (s, 1 H);  $^{13}\text{C NMR}$  (75 MHz,  $\text{CDCl}_3$ )  $\delta$  19.7 (CH<sub>3</sub>), 59.7 (CH<sub>2</sub>), 114.7 (CH<sub>2</sub>), 117.4 (CH), 120.0 (CH), 121.6 (CH), 121.8 (C), 122.8 (CH), 125.8 (CH), 140.1 (C), 148.7 (C); IR (KBr) 2926, 1613, 1516  $\text{cm}^{-1}$ ; EI-MS  $m/z$  (rel intensity) 172 ( $\text{M}^+$ , 100), 157 (17), 131 (76), 118 (29); HRMS [ $\text{M}$ ]<sup>+</sup> for C<sub>11</sub>H<sub>12</sub>N<sub>2</sub>: 172.1000, found 172.0998.

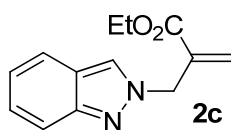

**Ethyl 2-((2H-indazol-2-yl)methyl)acrylate (2c):** 189 mg, 82% yield; An oil; TLC (EtOAc/hexanes (1:4))  $R_f = 0.25$ ;  $^1\text{H NMR}$  (300 MHz,  $\text{CDCl}_3$ )  $\delta$  1.25 (t,  $J = 7.2$  Hz, 3 H), 4.19 (q,  $J = 7.2$  Hz, 2 H), 5.24 (s, 2 H), 5.58 (t,  $J = 0.3$  Hz, 1 H), 6.37 (s, 1 H), 7.05 (t,  $J = 8.4$  Hz, 1 H), 7.25 (t,  $J = 8.4$  Hz, 1 H), 7.62 (d,  $J = 8.4$  Hz, 1 H), 7.67 (d,  $J = 8.4$  Hz, 1 H), 7.95 (s, 1 H);  $^{13}\text{C NMR}$  (75 MHz,  $\text{CDCl}_3$ )  $\delta$  14.0 (CH<sub>3</sub>), 53.8 (CH<sub>2</sub>), 61.1 (CH<sub>2</sub>), 117.3 (CH), 120.1 (CH), 121.7 (CH), 121.8 (C), 123.8 (CH), 126.0 (CH), 128.5 (CH<sub>2</sub>), 135.7 (C), 149.0 (C), 165.1 (C); IR (neat) 2985, 1717, 1124  $\text{cm}^{-1}$ ; EI-MS  $m/z$  (rel intensity) 230 ( $\text{M}^+$ , 47), 185 (14), 131 (100), 118 (35); HRMS [ $\text{M}$ ]<sup>+</sup> for C<sub>13</sub>H<sub>14</sub>N<sub>2</sub>O<sub>2</sub>: 230.1055, found 230.1049.

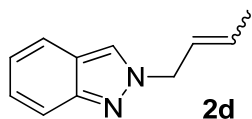

**2-(But-2-enyl)-2H-indazole (2d):** 122 mg, 71% yield; An oil; TLC (EtOAc/hexanes (1:4))  $R_f = 0.30$ ;  $^1\text{H NMR}$  (300 MHz,  $\text{CDCl}_3$ )  $\delta$  1.66 (d,  $J = 6.6$  Hz, 2.25 H), 1.71 (d,  $J = 6.6$  Hz, 0.75 H), 4.84 (d,  $J = 6.6$  Hz, 1.5 H), 4.97 (d,  $J = 6.6$  Hz, 0.5 H), 5.55-5.78 (m, 2 H), 6.98-7.03 (m, 1 H), 7.18-7.23 (m, 1 H), 7.57 (d,  $J = 8.7$  Hz, 1 H), 7.67 (d,  $J = 8.7$  Hz, 1 H), 7.78 (s, 1 H);  $^{13}\text{C NMR}$  (75 MHz,  $\text{CDCl}_3$ )  $\delta$  12.7, 17.4, 49.5, 55.1, 117.0, 117.1, 119.8, 121.2, 121.5, 121.8, 121.9, 123.6, 124.7, 125.4, 129.5, 131.0, 148.4, 148.5; IR (neat) 2937, 1626, 1526  $\text{cm}^{-1}$ ; EI-MS  $m/z$  (rel intensity) 172 ( $\text{M}^+$ , 32), 157 (33), 131 (8), 118 (100); HRMS [ $\text{M}$ ]<sup>+</sup> for C<sub>11</sub>H<sub>12</sub>N<sub>2</sub>: 172.1000, found 172.0998.

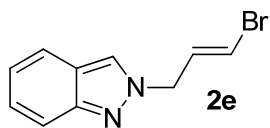

**(E)-2-(3-Bromoallyl)-2H-indazole (2e):** 213 mg, 90% yield; An oil; TLC (EtOAc/hexanes (1:4))  $R_f = 0.40$ ;  $^1\text{H NMR}$  (300 MHz,  $\text{CDCl}_3$ )  $\delta$  5.19 (d,  $J = 5.4$  Hz, 2 H), 6.47 -6.57 (m, 2 H), 7.04-7.09 (m, 1 H), 7.24-7.29 (m, 1 H), 7.61-7.70 (m, 2 H), 7.95 (s, 1 H);  $^{13}\text{C NMR}$  (75 MHz,  $\text{CDCl}_3$ )  $\delta$  52.3 ( $\text{CH}_2$ ), 111.7 (CH), 117.2 (CH), 120.0 (CH), 121.7 (CH), 121.8 (C), 122.7 (CH), 126.0 (CH), 129.0 (CH), 148.9 (C); IR (neat) 3009, 1623, 1288  $\text{cm}^{-1}$ ; EI-MS  $m/z$  (rel intensity) 238 ( $[\text{M}+2]^+$ , 22), 236 ( $\text{M}^+$ , 23), 157 (100), 130 (25); HRMS  $[\text{M}]^+$  for  $\text{C}_{10}\text{H}_9\text{BrN}_2$ : 235.9949, found 235.9943.

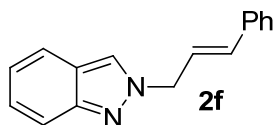

**2-Cinnamyl-2H-indazole (2f):** 162 mg, 69% yield; Solid, mp 98-99  $^\circ\text{C}$ ; TLC (EtOAc/hexanes (1:4))  $R_f = 0.38$ ;  $^1\text{H NMR}$  (300 MHz,  $\text{CDCl}_3$ )  $\delta$  5.12 (d,  $J = 6.6$  Hz, 2 H), 6.37-6.47 (m, 1 H), 6.63 (d,  $J = 15.9$  Hz, 1 H), 7.09 (d,  $J = 7.8$  Hz, 1 H), 7.22-7.38 (m, 6 H), 7.65 (d,  $J = 8.7$  Hz, 1 H), 7.67 (d,  $J = 8.7$  Hz, 1 H), 7.91 (s, 1 H);  $^{13}\text{C NMR}$  (75 MHz,  $\text{CDCl}_3$ )  $\delta$  55.4 ( $\text{CH}_2$ ), 117.2 (CH), 119.9 (CH), 121.5 (CH), 121.8 (C), 122.3 (CH), 122.9 (CH), 125.8 (CH), 126.4 (CH x 2), 128.0 (CH), 128.4 (CH x 2), 134.2 (CH), 135.6 (C), 148.7 (C); IR (KBr) 3122, 1514, 978  $\text{cm}^{-1}$ ; EI-MS  $m/z$  (rel intensity) 234 ( $\text{M}^+$ , 54), 157 (9), 131 (7), 117 (100); HRMS  $[\text{M}]^+$  for  $\text{C}_{16}\text{H}_{14}\text{N}_2$ : 234.1157, found 234.1149.

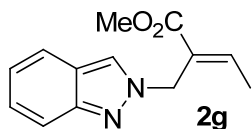

**(E)-Methyl 2-((2H-indazol-2-yl)methyl)but-2-enoate (2g):** 191 mg, 83% yield; An oil; TLC (EtOAc/hexanes (1:4))  $R_f = 0.23$ ;  $^1\text{H NMR}$  (300 MHz,  $\text{CDCl}_3$ )  $\delta$  2.08 (d,  $J = 7.5$  Hz, 3 H), 3.71 (s, 3 H), 5.31 (s, 2 H), 7.02 (t,  $J = 8.7$  Hz, 1 H), 7.20-7.30 (m, 2 H), 7.61 (d,  $J = 8.7$  Hz, 1 H), 7.67 (d,  $J = 8.7$  Hz, 1 H), 7.98 (s, 1 H);  $^{13}\text{C NMR}$  (75 MHz,  $\text{CDCl}_3$ )  $\delta$  14.9 ( $\text{CH}_3$ ), 48.2 ( $\text{CH}_2$ ), 52.0 ( $\text{CH}_3$ ), 117.3 (CH), 120.1 (CH), 121.4 (CH), 121.6 (C), 123.0 (CH), 125.7 (CH), 127.6 (C), 145.1 (CH), 148.6 (C), 166.7 (C); IR (neat) 2952, 1712, 1275  $\text{cm}^{-1}$ ; EI-MS  $m/z$  (rel intensity) 230 ( $\text{M}^+$ , 28), 215 (17), 131 (11), 118 (100); HRMS  $[\text{M}]^+$  for  $\text{C}_{13}\text{H}_{14}\text{N}_2\text{O}_2$ : 230.1055, found 230.1059.

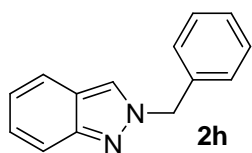

**2-Benzyl-2H-indazole (2h)**<sup>1</sup>: 169 mg, 81% yield; An oil; TLC (EtOAc/hexanes (1:4))  $R_f = 0.20$ ; <sup>1</sup>H NMR (300 MHz, CDCl<sub>3</sub>) δ 5.53 (s, 2 H), 7.05-7.10 (m, 1 H), 7.23-7.35 (m, 6 H), 7.61 (d,  $J = 8.4$  Hz, 1 H), 7.75 (d,  $J = 8.4$  Hz, 1 H), 7.83 (s, 1 H); <sup>13</sup>C NMR (75 MHz, CDCl<sub>3</sub>) δ 57.2 (CH<sub>2</sub>), 117.3 (CH), 120.0 (CH), 121.5 (CH), 121.9 (C), 122.7 (CH), 125.8 (CH), 127.7 (CH x 2), 128.1 (CH), 128.7 (CH x 2), 135.6 (C), 148.7 (C); IR (neat) 3064, 1628, 1510 cm<sup>-1</sup>; EI-MS  $m/z$  (rel intensity) 208 (M<sup>+</sup>, 52), 207 (37), 180 (4), 91 (100); HRMS [M]<sup>+</sup> for C<sub>14</sub>H<sub>12</sub>N<sub>2</sub>: 208.1000, found 208.0992.

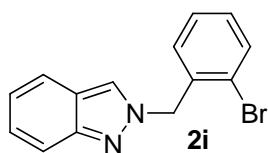

**2-(2-Bromobenzyl)-2H-indazole (2i)**: 258 mg, 90% yield; An oil; TLC (EtOAc/hexanes (1:4))  $R_f = 0.50$ ; <sup>1</sup>H NMR (300 MHz, CDCl<sub>3</sub>) δ 5.59 (s, 2 H), 6.87-6.90 (m, 1 H), 7.02-7.15 (m, 3 H), 7.24 (d,  $J = 8.0$  Hz, 1 H), 7.50 (d,  $J = 8.0$  Hz, 1 H), 7.58 (d,  $J = 8.0$  Hz, 1 H), 7.75 (d,  $J = 8.0$  Hz, 1 H), 7.88 (s, 1 H); <sup>13</sup>C NMR (75 MHz, CDCl<sub>3</sub>) δ 56.6 (CH<sub>2</sub>), 117.1 (CH), 119.9 (CH), 121.4 (CH), 121.6 (C), 122.7 (C), 123.3 (CH), 125.7 (CH), 127.6 (CH), 129.4 (CH x 2), 132.4 (CH), 134.9 (C), 148.6 (C); IR (neat) 3061, 1621, 1421 cm<sup>-1</sup>; EI-MS  $m/z$  (rel intensity) 288 ([M+2]<sup>+</sup>, 17), 286 (M<sup>+</sup>, 18), 207 (100), 169 (26); HRMS [M]<sup>+</sup> for C<sub>14</sub>H<sub>11</sub>BrN<sub>2</sub>: 286.0106, found 286.0111.

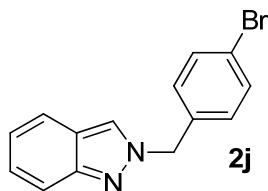

**2-(4-Bromobenzyl)-2H-indazole (2j)**: 218 mg, 76% yield; Solid, mp 112-113 °C; TLC (EtOAc/hexanes (1:4))  $R_f = 0.30$ ; <sup>1</sup>H NMR (300 MHz, CDCl<sub>3</sub>) δ 5.41 (s, 2 H), 7.02-7.08 (m, 3 H), 7.25-7.29 (m, 1 H), 7.37-7.41 (m, 2 H), 7.59 (d,  $J = 8.7$  Hz, 1 H), 7.73 (d,  $J = 8.7$  Hz, 1 H), 7.79 (s, 1 H); <sup>13</sup>C NMR (75 MHz, CDCl<sub>3</sub>) δ 56.3 (CH<sub>2</sub>), 117.2 (CH), 119.9 (CH), 121.6 (CH), 121.8 (C), 122.0 (C), 122.7 (CH), 125.9 (CH), 129.2 (CH x 2), 131.6 (CH x 2), 134.5 (C), 148.7 (C); IR (KBr) 3115, 1486, 1348 cm<sup>-1</sup>; EI-MS  $m/z$  (rel intensity) 288 ([M+2]<sup>+</sup>, 70), 286 (M<sup>+</sup>, 70), 207 (18), 169 (100); HRMS [M]<sup>+</sup> for C<sub>14</sub>H<sub>11</sub>BrN<sub>2</sub>: 286.0106, found 286.0097.

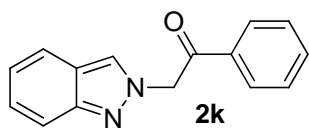

**2-(2H-Indazol-2-yl)-1-phenylethanone (2k):** 180 mg, 76% yield; Solid, mp 122-124 °C; TLC (EtOAc/hexanes (1:4))  $R_f = 0.08$ ;  $^1\text{H NMR}$  (300 MHz,  $\text{CDCl}_3$ )  $\delta$  5.70 (s, 2 H), 7.02-7.08 (m, 1 H), 7.22-7.28 (m, 1 H), 7.34-7.39 (m, 2 H), 7.50-7.70 (m, 3 H), 7.82-7.93 (m, 3 H);  $^{13}\text{C NMR}$  (75 MHz,  $\text{CDCl}_3$ )  $\delta$  58.9 ( $\text{CH}_2$ ), 117.4 (CH), 120.3 (CH), 121.9 (CH), 122.3 (C), 124.7 (CH), 126.2 (CH), 128.1 (CH x 2), 129.0 (CH x 2), 134.2 (CH), 134.3 (C), 149.0 (C), 191.3 (C); IR (KBr) 2919, 1708, 1236  $\text{cm}^{-1}$ ; EI-MS  $m/z$  (rel intensity) 236 ( $\text{M}^+$ , 23), 207 (20), 146 (16), 105 (100); HRMS [ $\text{M}$ ] $^+$  for  $\text{C}_{15}\text{H}_{12}\text{N}_2\text{O}$ : 236.0950, found 236.0952.

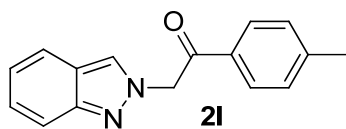

**2-(2H-Indazol-2-yl)-1-p-tolyloethanone (2l):** 195 mg, 78% yield; Solid, mp 200-201 °C; TLC (EtOAc/hexanes (1:4))  $R_f = 0.20$ ;  $^1\text{H NMR}$  (300 MHz,  $\text{DMSO}-d_6$ )  $\delta$  2.44 (s, 3 H), 6.18 (s, 2 H), 7.08 (t,  $J = 8.4$  Hz, 1 H), 7.29 (t,  $J = 8.4$  Hz, 1 H), 7.44 (d,  $J = 8.4$  Hz, 2 H), 7.63 (d,  $J = 8.4$  Hz, 1 H), 7.78 (d,  $J = 8.4$  Hz, 1 H), 8.02 (d,  $J = 8.4$  Hz, 2 H), 8.42 (s, 1 H);  $^{13}\text{C NMR}$  (75 MHz,  $\text{DMSO}-d_6$ )  $\delta$  22.2 ( $\text{CH}_3$ ), 60.1 ( $\text{CH}_2$ ), 117.9 (CH), 121.7 (CH), 122.0 (CH), 122.6 (C), 126.5 (CH), 126.7 (CH), 129.2 (CH x 2), 130.5 (CH x 2), 132.9 (C), 145.7 (C), 149.1 (C), 193.3 (C); IR (KBr) 2938, 1700, 1246  $\text{cm}^{-1}$ ; EI-MS  $m/z$  (rel intensity) 250 ( $\text{M}^+$ , 20), 222 (16), 119 (100), 91 (35); HRMS [ $\text{M}$ ] $^+$  for  $\text{C}_{16}\text{H}_{14}\text{N}_2\text{O}$ : 250.1106, found 250.1115.

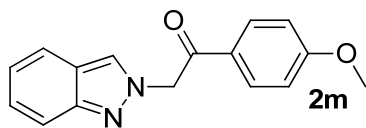

**2-(2H-Indazol-2-yl)-1-(4-methoxyphenyl)ethanone (2m).** 210 mg, 79% yield; Solid, mp 157-158 °C; TLC (EtOAc/hexanes (1:4))  $R_f = 0.20$ ;  $^1\text{H NMR}$  (300 MHz,  $\text{DMSO}-d_6$ )  $\delta$  3.89 (s, 3 H), 6.17 (s, 2 H), 7.09 (t,  $J = 8.4$  Hz, 1 H), 7.14 (t,  $J = 9.0$  Hz, 2 H), 7.30 (t,  $J = 8.4$  Hz, 1 H), 7.65 (d,  $J = 8.4$  Hz, 1 H), 7.79 (d,  $J = 8.4$  Hz, 1 H), 8.12 (d,  $J = 9.0$  Hz, 2 H), 8.43 (s, 1 H);  $^{13}\text{C NMR}$  (75 MHz,  $\text{DMSO}-d_6$ )  $\delta$  56.6 ( $\text{CH}_3$ ), 59.9 ( $\text{CH}_2$ ), 115.2 (CH x 2), 117.9 (CH), 121.7 (CH), 122.0 (CH), 122.7 (C), 126.5 (CH), 126.7 (CH), 128.3 (C), 131.5 (CH x 2), 149.2 (C), 164.8 (C), 192.1 (C); IR (KBr) 2938, 1680, 1597  $\text{cm}^{-1}$ ; EI-MS  $m/z$  (rel intensity) 266 ( $\text{M}^+$ , 16), 238 (15), 135 (100), 121 (55); HRMS [ $\text{M}$ ] $^+$  for  $\text{C}_{16}\text{H}_{14}\text{N}_2\text{O}_2$ : 266.1055, found 266.1051.

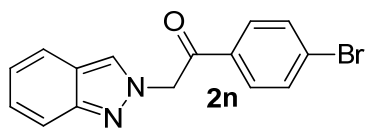

**1-(4-Bromophenyl)-2-(2H-indazol-2-yl)ethanone (2n).** 246 mg, 78% yield; Solid, mp 169-170 °C; TLC (EtOAc/hexanes (1:4))  $R_f = 0.20$ ;  $^1\text{H NMR}$  (300 MHz, DMSO- $d_6$ )  $\delta$  6.22 (s, 2 H), 7.09 (t,  $J = 8.4$  Hz, 1 H), 7.29 (t,  $J = 8.4$  Hz, 1 H), 7.64 (d,  $J = 8.4$  Hz, 1 H), 7.78 (d,  $J = 8.4$  Hz, 1 H), 7.85 (d,  $J = 8.4$  Hz, 2 H), 8.05 (d,  $J = 8.4$  Hz, 2 H), 8.42 (s, 1 H);  $^{13}\text{C NMR}$  (75 MHz, DMSO- $d_6$ )  $\delta$  60.2 (CH<sub>2</sub>), 117.9 (CH), 121.7 (CH), 122.1 (CH), 122.7 (C), 126.6 (CH), 126.7 (CH), 129.3 (C), 131.1 (CH x 2), 133.1 (CH x 2), 134.4 (C), 149.2 (C), 193.2 (C); IR (KBr) 2965, 1702, 1578 cm<sup>-1</sup>; EI-MS  $m/z$  (rel intensity) 316 ([M+2]<sup>+</sup>, 26), 314 (M<sup>+</sup>, 26), 250 (60), 183 (100); HRMS [M]<sup>+</sup> for C<sub>15</sub>H<sub>11</sub>BrN<sub>2</sub>O: 314.0055, found 314.0061.

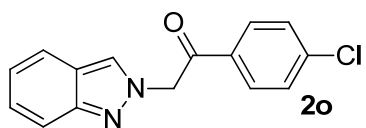

**1-(4-Chlorophenyl)-2-(2H-indazol-2-yl)ethanone (2o).** 200 mg, 74% yield; Solid, mp 152-153 °C; TLC (EtOAc/hexanes (1:4))  $R_f = 0.20$ ;  $^1\text{H NMR}$  (300 MHz, DMSO- $d_6$ )  $\delta$  6.23 (s, 2 H), 7.09 (t,  $J = 8.4$  Hz, 1 H), 7.26-7.32 (m, 1 H), 7.63-7.71 (m, 3 H), 7.78 (d,  $J = 8.4$  Hz, 1 H), 8.13 (d,  $J = 8.4$  Hz, 2 H), 8.43 (s, 1 H);  $^{13}\text{C NMR}$  (75 MHz, DMSO- $d_6$ )  $\delta$  60.2 (CH<sub>2</sub>), 117.9 (CH), 121.7 (CH), 122.1 (CH), 122.7 (C), 126.6 (CH), 126.7 (CH), 130.1 (CH x 2), 131.0 (CH x 2), 134.1 (C), 140.0 (C), 149.2 (C), 193.0 (C); IR (KBr) 2956, 1701, 1228 cm<sup>-1</sup>; EI-MS  $m/z$  (rel intensity) 272 ([M+2]<sup>+</sup>, 8), 270 (M<sup>+</sup>, 23), 241 (27), 139 (100); HRMS [M]<sup>+</sup> for C<sub>15</sub>H<sub>11</sub>ClN<sub>2</sub>O: 270.0560, found 270.0565.

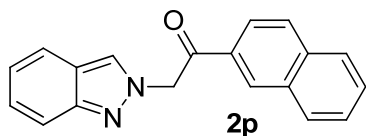

**2-(2H-Indazol-2-yl)-1-(naphthalen-2-yl)ethanone (2p).** 235 mg, 82% yield; Solid, mp 200-201 °C; TLC (EtOAc/hexanes (1:4))  $R_f = 0.18$ ;  $^1\text{H NMR}$  (300 MHz, DMSO- $d_6$ )  $\delta$  6.37 (s, 2 H), 7.10 (t,  $J = 7.8$  Hz, 1 H), 7.30 (t,  $J = 7.8$  Hz, 1 H), 7.64-7.82 (m, 4 H), 8.06-8.14 (m, 3 H), 8.21 (d,  $J = 7.8$  Hz, 1 H), 8.48 (s, 1 H), 8.92 (s, 1 H);  $^{13}\text{C NMR}$  (75 MHz, DMSO- $d_6$ )  $\delta$  60.2 (CH<sub>2</sub>), 117.9 (CH), 121.7 (CH), 122.0 (CH), 122.7 (C), 124.3 (CH), 126.6 (CH), 126.8 (CH), 128.2 (CH), 128.8 (CH), 129.6 (CH), 130.1 (CH), 130.7 (CH), 131.4 (CH), 132.7 (C), 133.1 (C), 136.4 (C), 149.2 (C), 193.8 (C); IR (KBr) 2938, 1690, 1394 cm<sup>-1</sup>; EI-MS  $m/z$  (rel intensity) 286 (M<sup>+</sup>, 23), 258 (30), 155 (100), 127 (67); HRMS [M]<sup>+</sup> for C<sub>19</sub>H<sub>14</sub>N<sub>2</sub>O: 286.1106, found 286.1102.

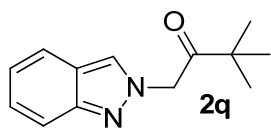

**1-(2*H*-Indazol-2-yl)-3,3-dimethylbutan-2-one (2q).** 203 mg, 94% yield; Solid, mp 100-101 °C; TLC (EtOAc/hexanes (1:4))  $R_f = 0.20$ ;  $^1\text{H NMR}$  (300 MHz,  $\text{CDCl}_3$ )  $\delta$  1.28 (s, 9 H), 5.39 (s, 2 H), 7.05 (t,  $J = 8.4$  Hz, 1 H), 7.25 (t,  $J = 8.4$  Hz, 1 H), 7.64 (d,  $J = 8.4$  Hz, 1 H), 7.67 (d,  $J = 8.4$  Hz, 1 H), 7.91 (s, 1 H);  $^{13}\text{C NMR}$  (75 MHz,  $\text{CDCl}_3$ )  $\delta$  25.9 ( $\text{CH}_3 \times 3$ ), 43.3 (C), 56.9 ( $\text{CH}_2$ ), 117.1 (CH), 120.1 (CH), 121.5 (CH), 121.9 (C), 124.6 (CH), 125.9 (CH), 148.7 (C), 206.7 (C); IR (KBr) 2974, 1726, 1486  $\text{cm}^{-1}$ ; EI-MS  $m/z$  (rel intensity) 216 ( $\text{M}^+$ , 62), 131 (100), 118 (32), 77 (32); HRMS  $[\text{M}]^+$  for  $\text{C}_{13}\text{H}_{16}\text{N}_2\text{O}$ : 216.1263, found 216.1268.

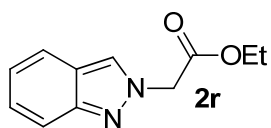

**Ethyl 2-(2*H*-indazol-2-yl)acetate (2r).** 167 mg, 82% yield; An oil; TLC (EtOAc/hexanes (1:4))  $R_f = 0.20$ ;  $^1\text{H NMR}$  (300 MHz,  $\text{CDCl}_3$ )  $\delta$  1.24 (t,  $J = 7.2$  Hz, 3 H), 4.21 (q,  $J = 7.2$  Hz, 2 H), 5.14 (s, 2 H), 7.06 (t,  $J = 8.4$  Hz, 1 H), 7.26 (t,  $J = 8.4$  Hz, 1 H), 7.62 (d,  $J = 8.4$  Hz, 1 H), 7.68 (d,  $J = 8.4$  Hz, 1 H), 7.95 (s, 1 H);  $^{13}\text{C NMR}$  (75 MHz,  $\text{CDCl}_3$ )  $\delta$  13.7 ( $\text{CH}_3$ ), 54.1 ( $\text{CH}_2$ ), 61.8 ( $\text{CH}_2$ ), 117.2 (CH), 120.1 (CH), 121.7 (CH), 121.8 (C), 124.3 (CH), 126.1 (CH), 148.8 (C), 166.9 (C); IR (neat) 2934, 1744, 1209  $\text{cm}^{-1}$ ; EI-MS  $m/z$  (rel intensity) 204 ( $\text{M}^+$ , 70), 131 (100), 118 (11), 103 (19); HRMS  $[\text{M}]^+$  for  $\text{C}_{11}\text{H}_{12}\text{N}_2\text{O}_2$ : 204.0899, found 204.0894.

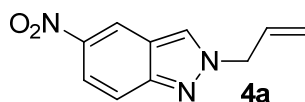

**2-Allyl-5-nitro-2*H*-indazole (4a).** 112 mg, 55% yield; An oil; TLC (EtOAc/hexanes (1:2))  $R_f = 0.30$ ;  $^1\text{H NMR}$  (300 MHz,  $\text{CDCl}_3$ )  $\delta$  5.06 (d,  $J = 6.3$  Hz, 2 H), 5.31-5.41 (m, 2 H), 6.04-6.18 (m, 1 H), 7.71 (d,  $J = 9.6$  Hz, 1 H), 8.05 (d,  $J = 9.6$  Hz, 1 H), 8.21 (s, 1 H), 8.68 (s, 1 H);  $^{13}\text{C NMR}$  (75 MHz,  $\text{CDCl}_3$ )  $\delta$  56.6 ( $\text{CH}_2$ ), 118.3 (CH), 119.3 (CH), 120.1 (C), 120.2 (CH), 120.6 ( $\text{CH}_2$ ), 126.7 (CH), 131.1 (CH), 143.0 (C), 149.8 (C); IR (neat) 2928, 1496, 1329  $\text{cm}^{-1}$ ; EI-MS  $m/z$  (rel intensity) 203 ( $[\text{M}]^+$ , 100), 202 (71), 176 (41), 130 (25); HRMS  $[\text{M}]^+$  for  $\text{C}_{10}\text{H}_9\text{N}_3\text{O}_2$ : 203.0695, found 203.0686.

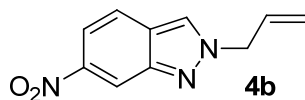



**2-Allyl-6-nitro-2H-indazole (4b).** 102 mg, 50% yield; An oil; TLC (EtOAc/hexanes (1:2))  $R_f = 0.30$ ;  $^1\text{H}$  NMR (300 MHz,  $\text{CDCl}_3$ )  $\delta$  5.07 (d,  $J = 6.3$  Hz, 2 H), 5.30-5.38 (m, 2 H), 6.03-6.16 (m, 1 H), 7.71 (d,  $J = 9.3$  Hz, 1 H), 7.82 (d,  $J = 9.3$  Hz, 1 H), 8.04 (s, 1 H), 8.62 (s, 1 H);  $^{13}\text{C}$  NMR (75 MHz,  $\text{CDCl}_3$ )  $\delta$  56.7 ( $\text{CH}_2$ ), 115.4 (CH), 115.6 (CH), 120.4 ( $\text{CH}_2$ ), 121.4 (CH), 123.5 (CH), 124.3 (C), 131.2 (CH), 146.3 (C), 146.7 (C); IR (neat) 2938, 1523, 1338  $\text{cm}^{-1}$ ; EI-MS  $m/z$  (rel intensity) 203 ( $[\text{M}]^+$ , 100), 202 (64), 176 (40), 130 (21); HRMS  $[\text{M}]^+$  for  $\text{C}_{10}\text{H}_9\text{N}_3\text{O}_2$ : 203.0695, found 203.0700.

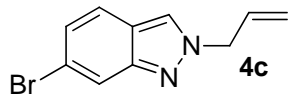

**2-Allyl-6-bromo-2H-indazole (4c).** 185 mg, 78% yield; An oil; TLC (EtOAc/hexanes (1:4))  $R_f = 0.28$ ;  $^1\text{H}$  NMR (300 MHz,  $\text{CDCl}_3$ )  $\delta$  4.98 (d,  $J = 6.0$  Hz, 2 H), 5.25-5.34 (m, 2 H), 6.01-6.14 (m, 1 H), 7.12 (d,  $J = 8.7$  Hz, 1 H), 7.49 (d,  $J = 8.7$  Hz, 1 H), 7.86 (s, 1 H), 7.88 (s, 1 H);  $^{13}\text{C}$  NMR (75 MHz,  $\text{CDCl}_3$ )  $\delta$  56.0 ( $\text{CH}_2$ ), 119.6 (CH), 119.7 ( $\text{CH}_2$ ), 119.8 (C), 120.3 (C), 121.4 (CH), 123.0 (CH), 125.3 (CH), 131.7 (CH), 149.4 (C); IR (neat) 2934, 1612, 920  $\text{cm}^{-1}$ ; EI-MS  $m/z$  (rel intensity) 238 ( $[\text{M}+2]^+$ , 97), 236 ( $\text{M}^+$ , 100), 211 (64), 209 (66); HRMS  $[\text{M}]^+$  for  $\text{C}_{10}\text{H}_9\text{BrN}_2$ : 235.9949, found 235.9956.

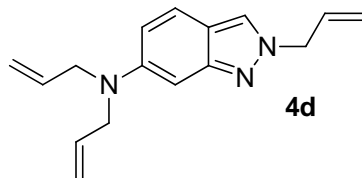

***N,N*,2-Triallyl-2H-indazol-6-amine (4d).** 203 mg, 80% yield; An oil; TLC (EtOAc/hexanes (1:2))  $R_f = 0.45$ ;  $^1\text{H}$  NMR (300 MHz,  $\text{CDCl}_3$ )  $\delta$  3.93 (d,  $J = 6.3$  Hz, 4 H), 4.86 (d,  $J = 6.3$  Hz, 2 H), 5.11-5.26 (m, 6 H), 5.79-5.91 (m, 2 H), 5.98-6.11 (m, 1 H), 6.74 (d,  $J = 9.0$  Hz, 1 H), 6.77 (s, 1 H), 7.41 (d,  $J = 9.0$  Hz, 1 H), 7.65 (s, 1 H);  $^{13}\text{C}$  NMR (75 MHz,  $\text{CDCl}_3$ )  $\delta$  53.0 ( $\text{CH}_2 \times 2$ ), 55.4 ( $\text{CH}_2$ ), 94.7 (CH), 114.3 (CH), 115.7 (C), 116.0 ( $\text{CH}_2 \times 2$ ), 118.7 ( $\text{CH}_2$ ), 120.1 (CH), 122.1 (CH), 132.5 (CH), 133.9 (CH  $\times 2$ ), 147.3 (C), 150.5 (C); IR (neat) 2929, 1625, 1496  $\text{cm}^{-1}$ ; EI-MS  $m/z$  (rel intensity) 253 ( $[\text{M}]^+$ , 100), 238 (29), 212 (39), 184 (27); HRMS  $[\text{M}]^+$  for  $\text{C}_{16}\text{H}_{19}\text{N}_3$ : 253.1579, found 253.1581.

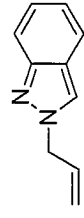

2a, CDCl<sub>3</sub>, 300 MHz

300-LHJ-II-252F9-2

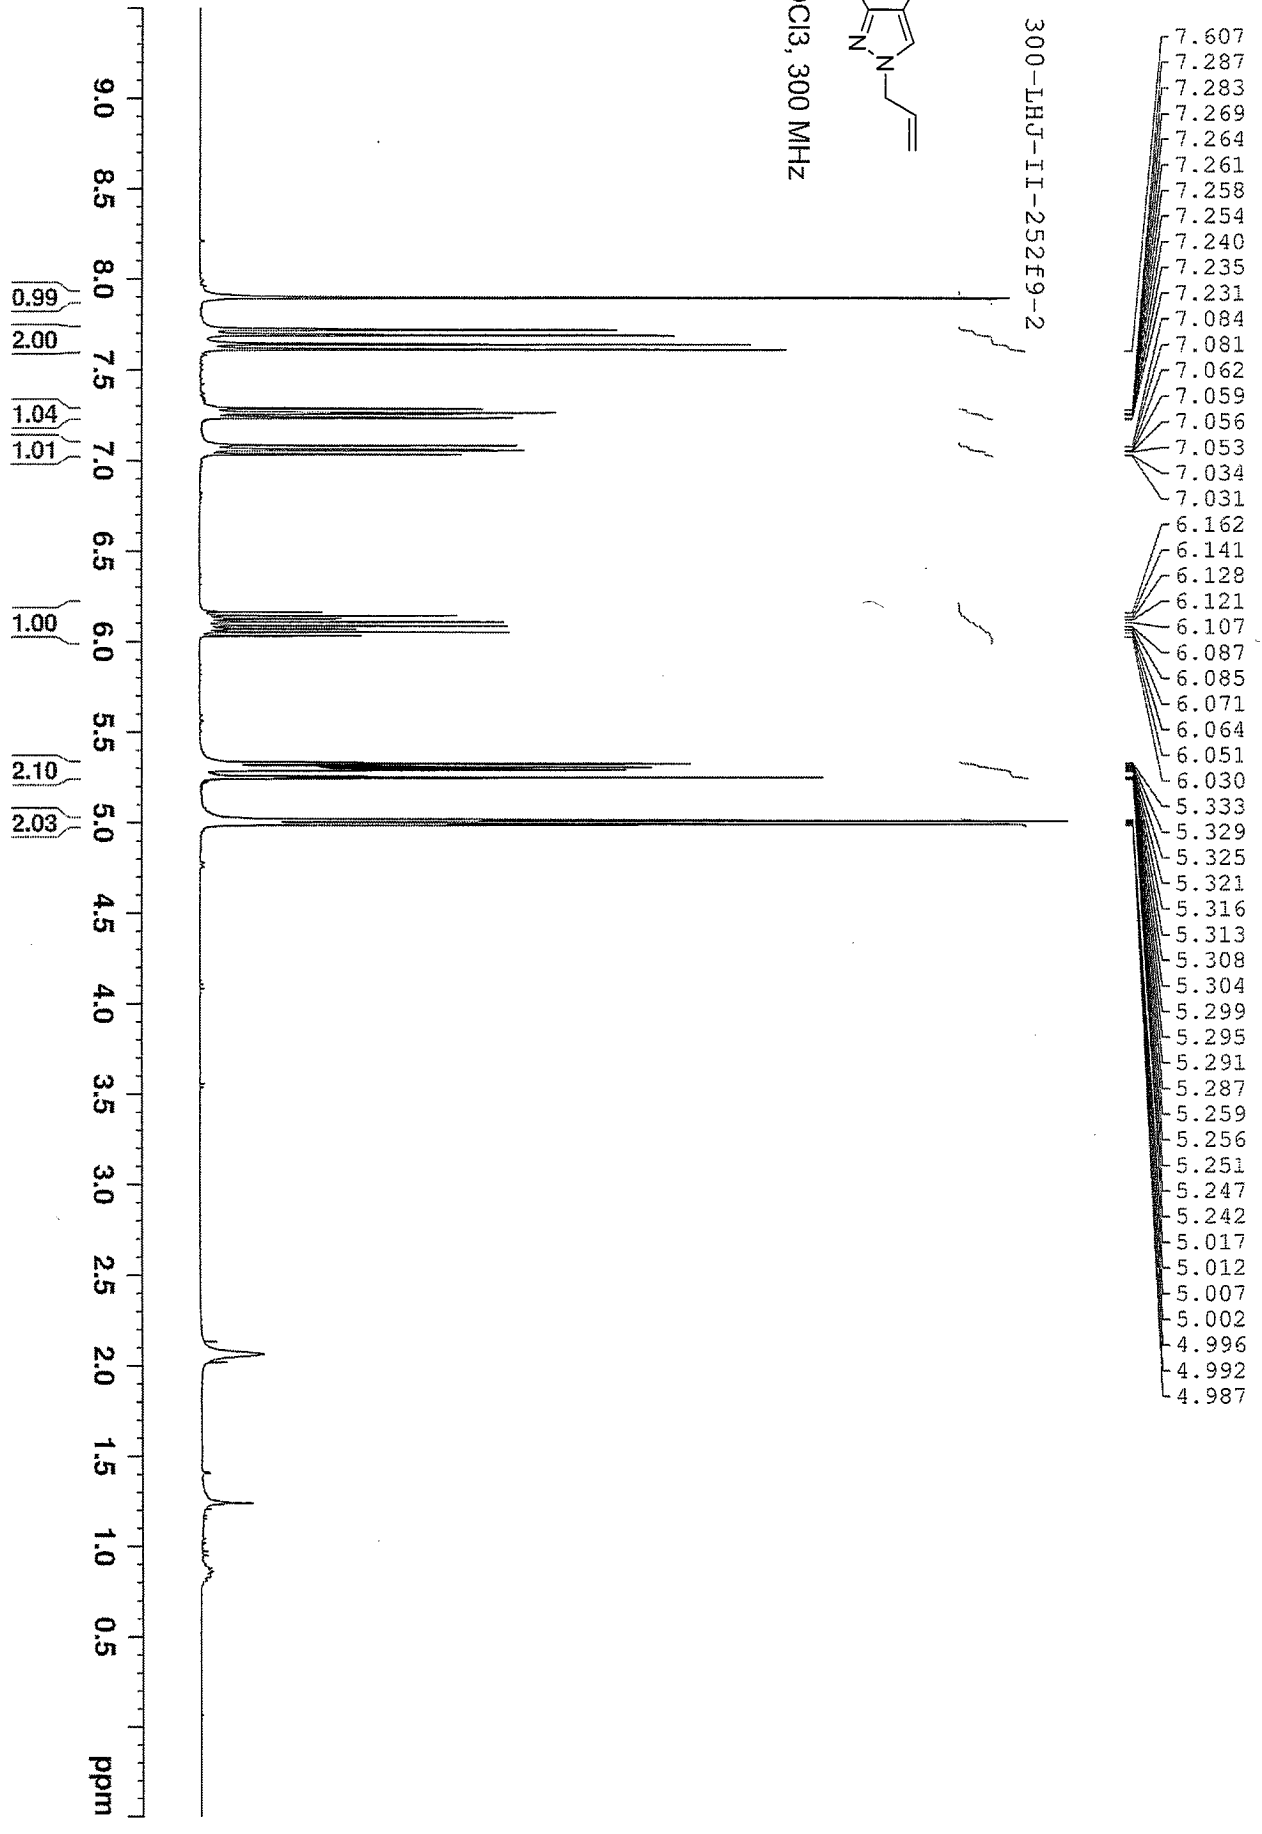

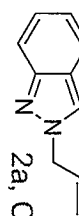

2a, CDCl<sub>3</sub>, 75 MHz

300-LHJ-II-2521F9-2

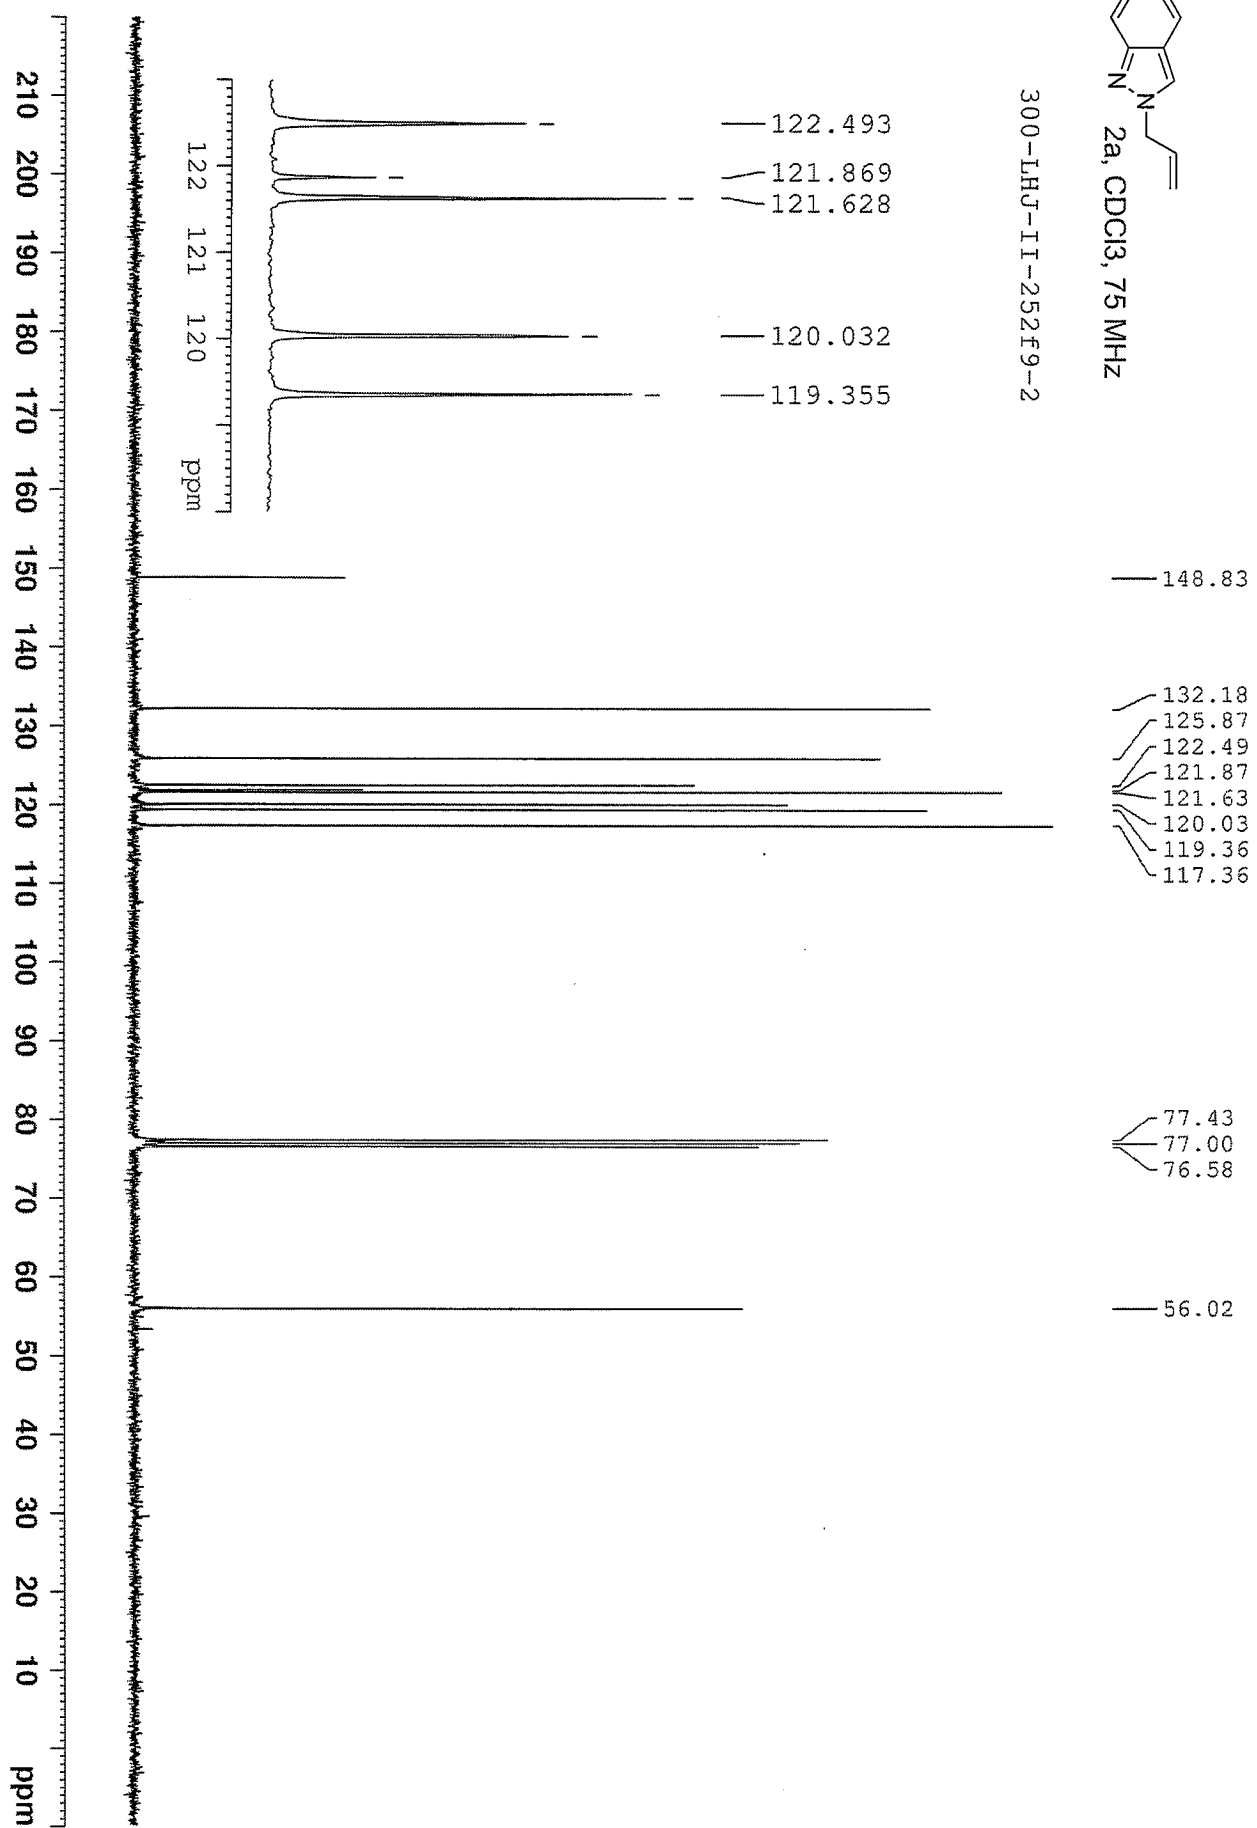

300-LHJ-III-3purity2 (HSQC)

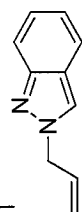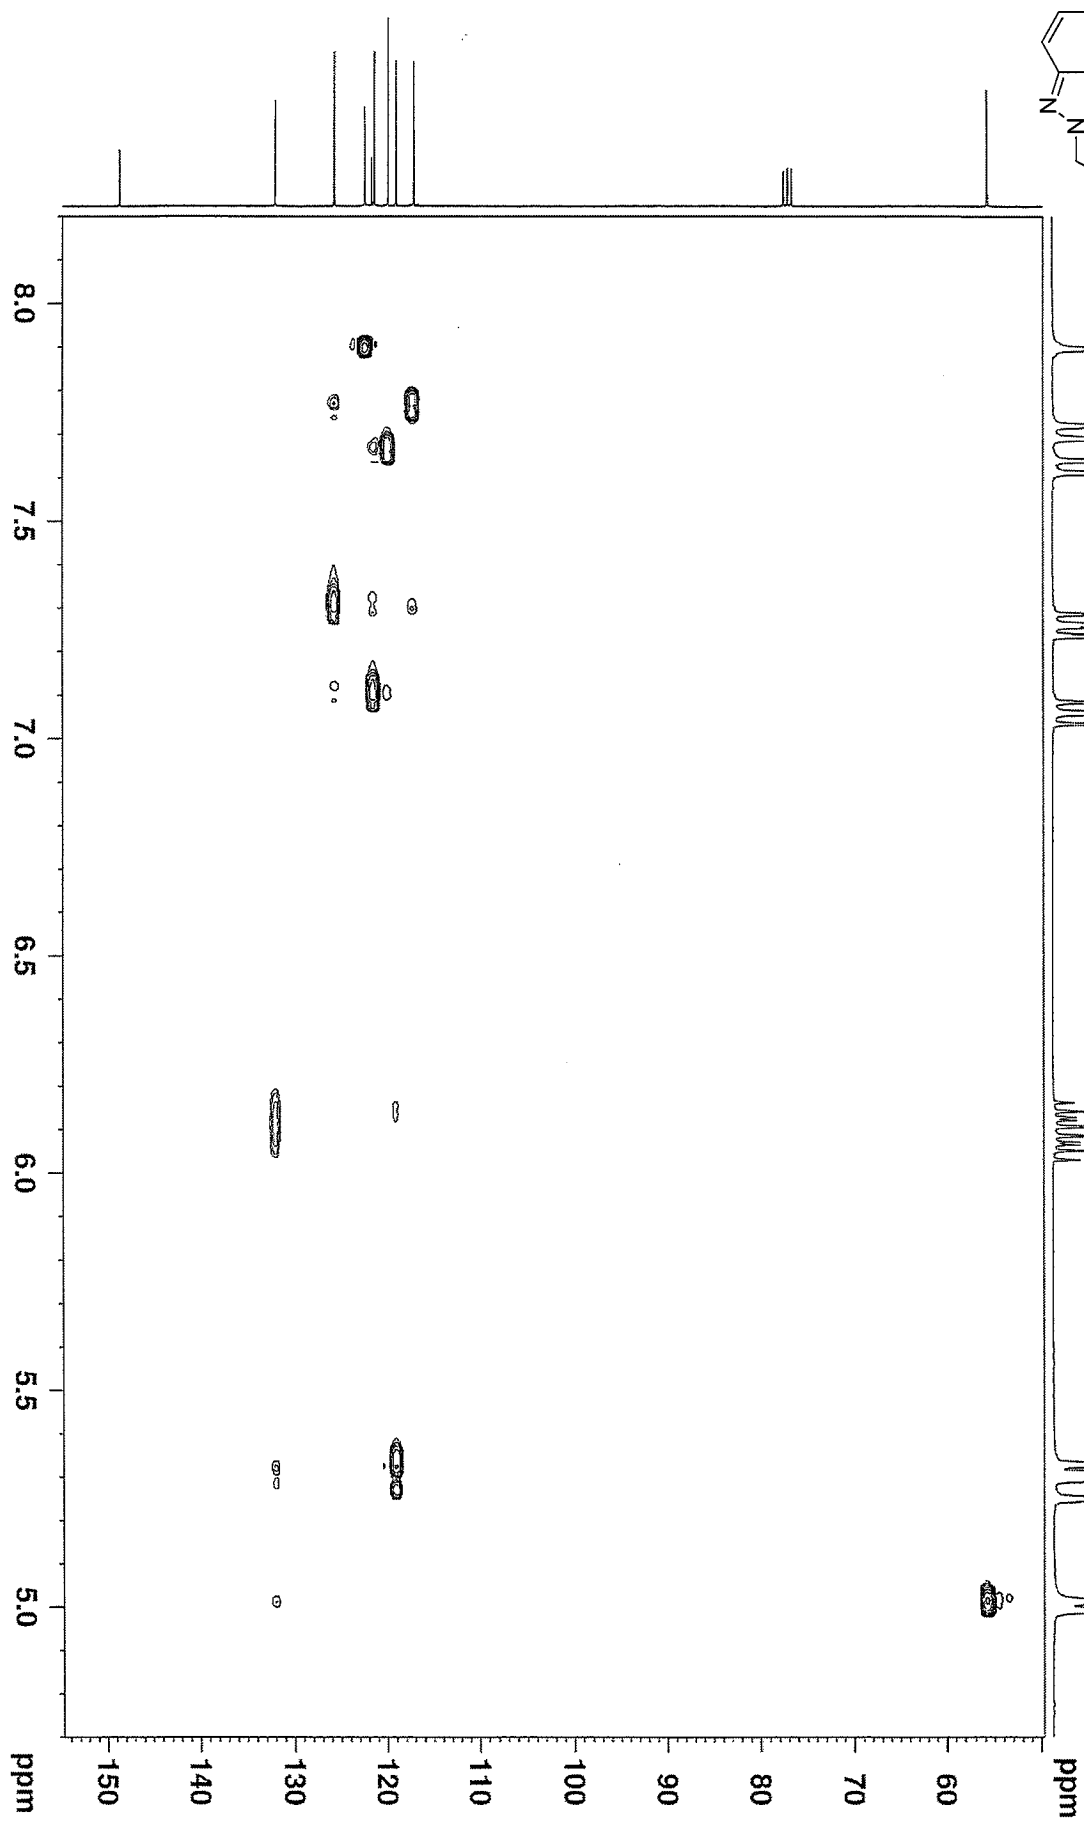

300-LHJ-III-3purity4 (HMBC)

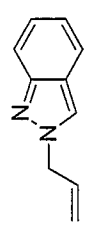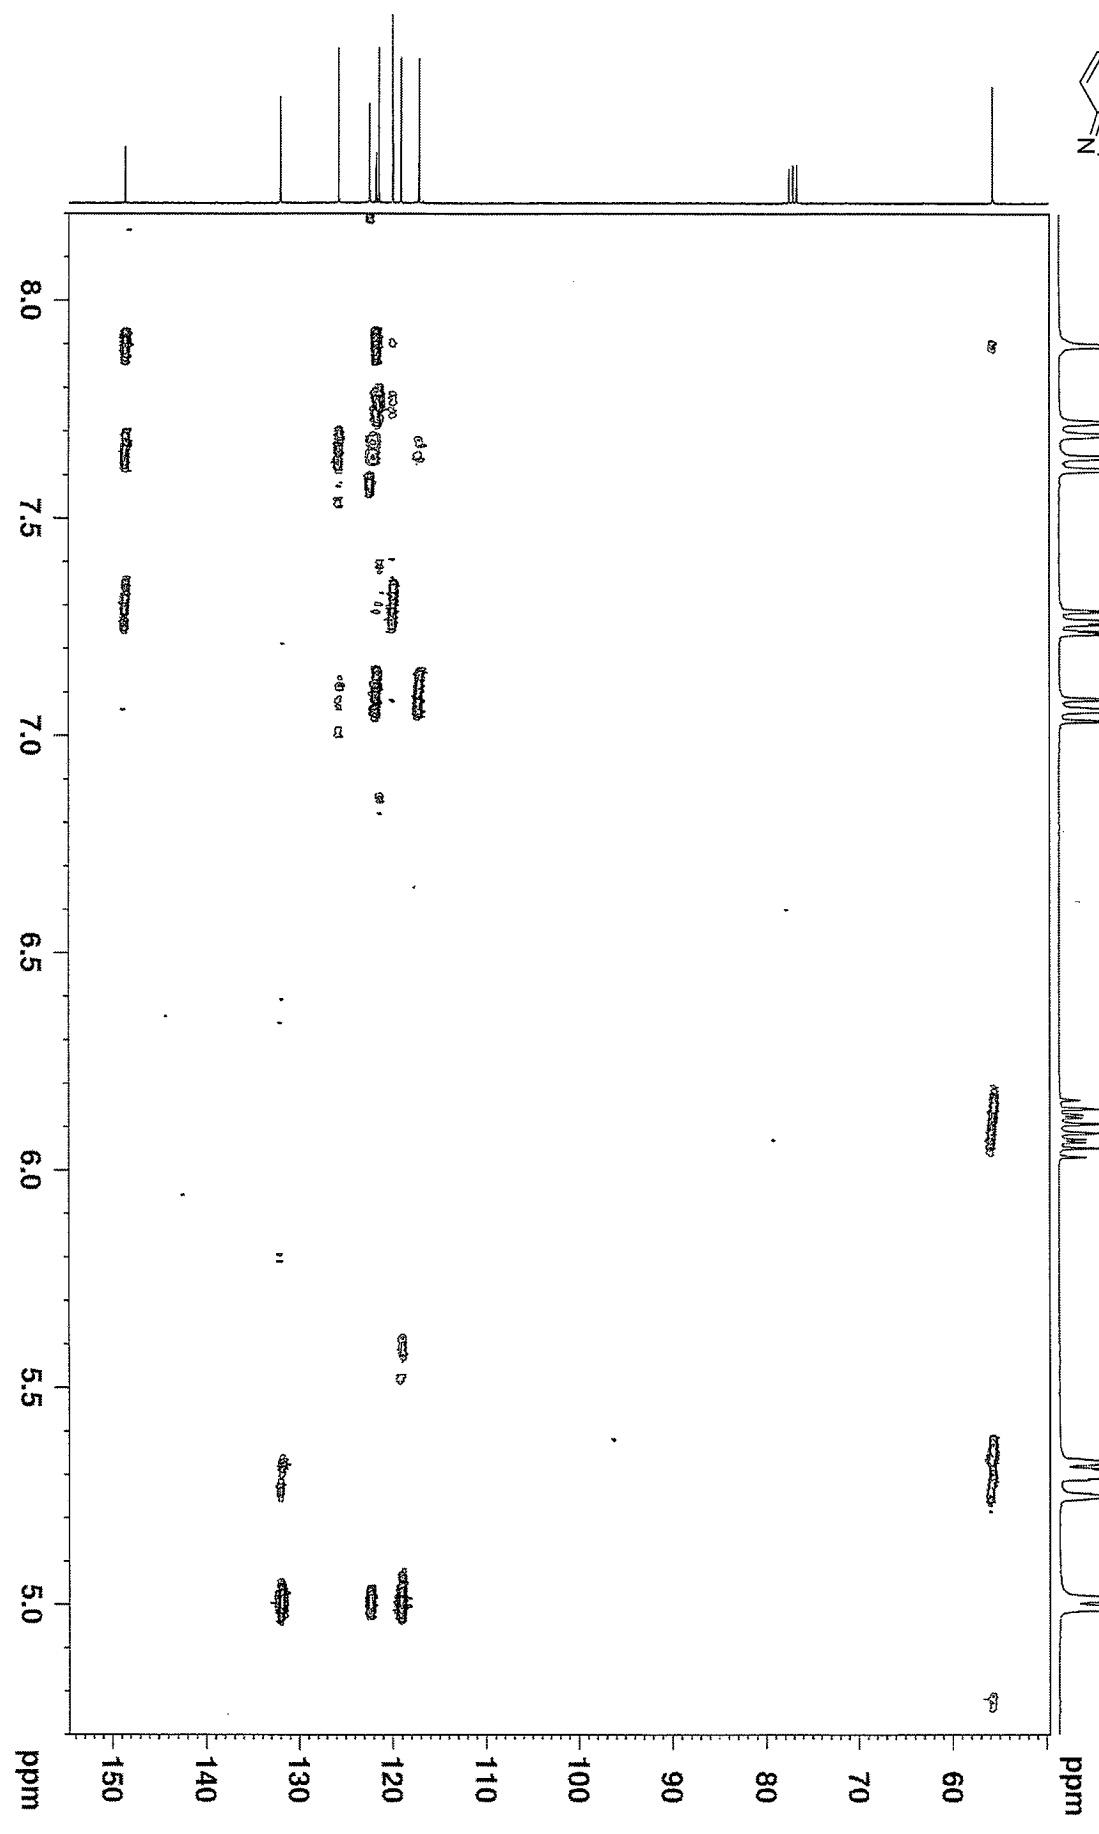

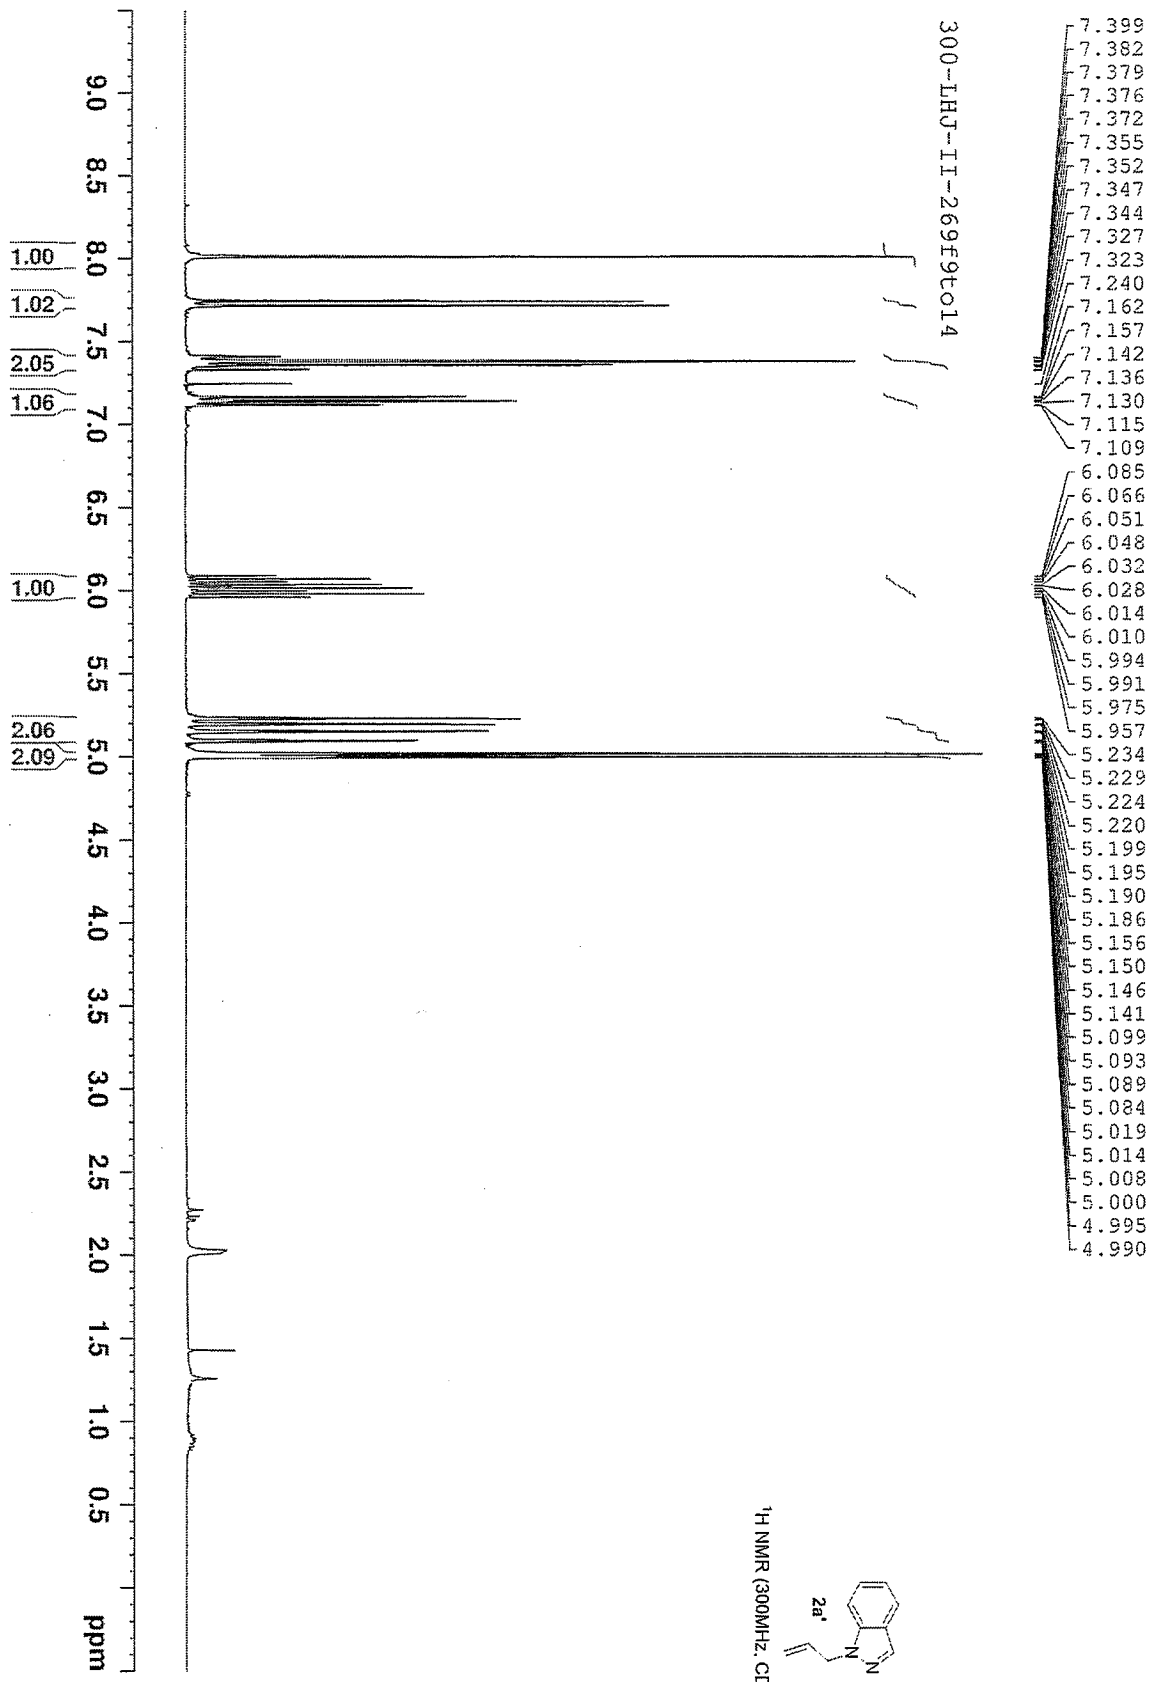

300-LHJ-II-269F9To14

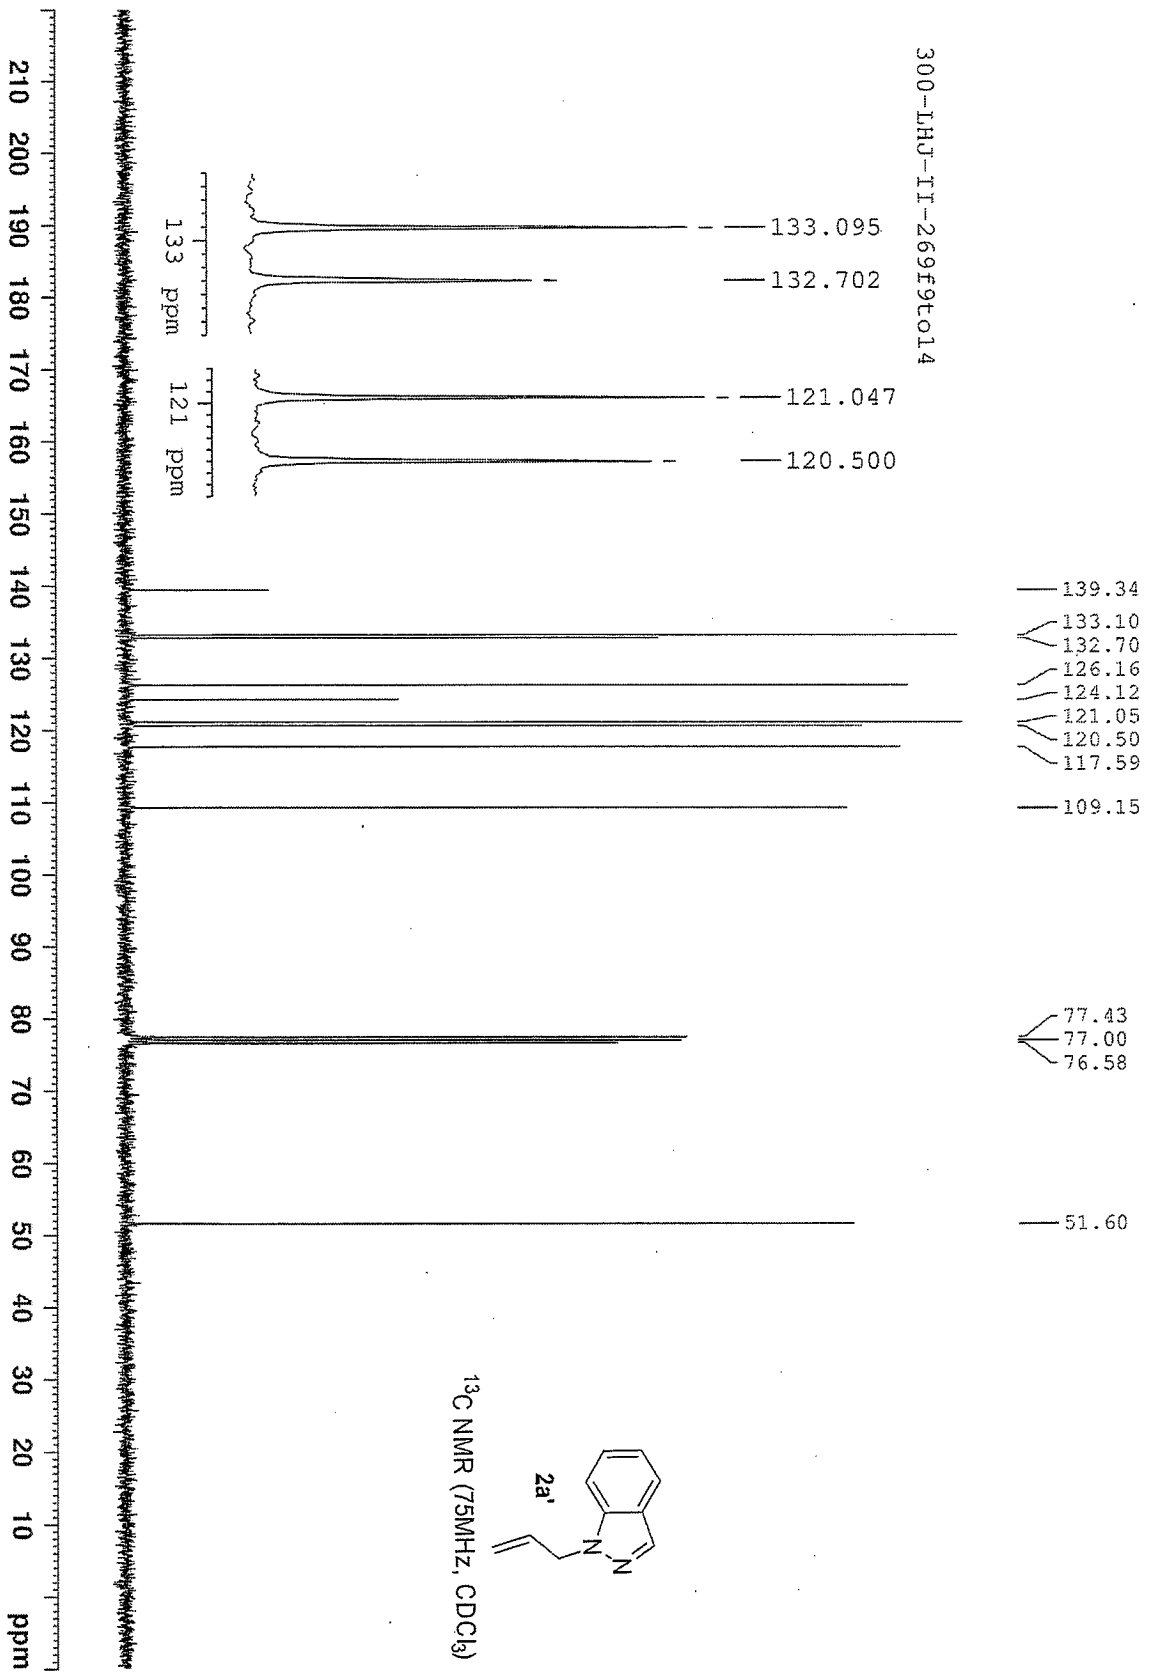

300-LHJ-II-269F9C014 / DEPT-135

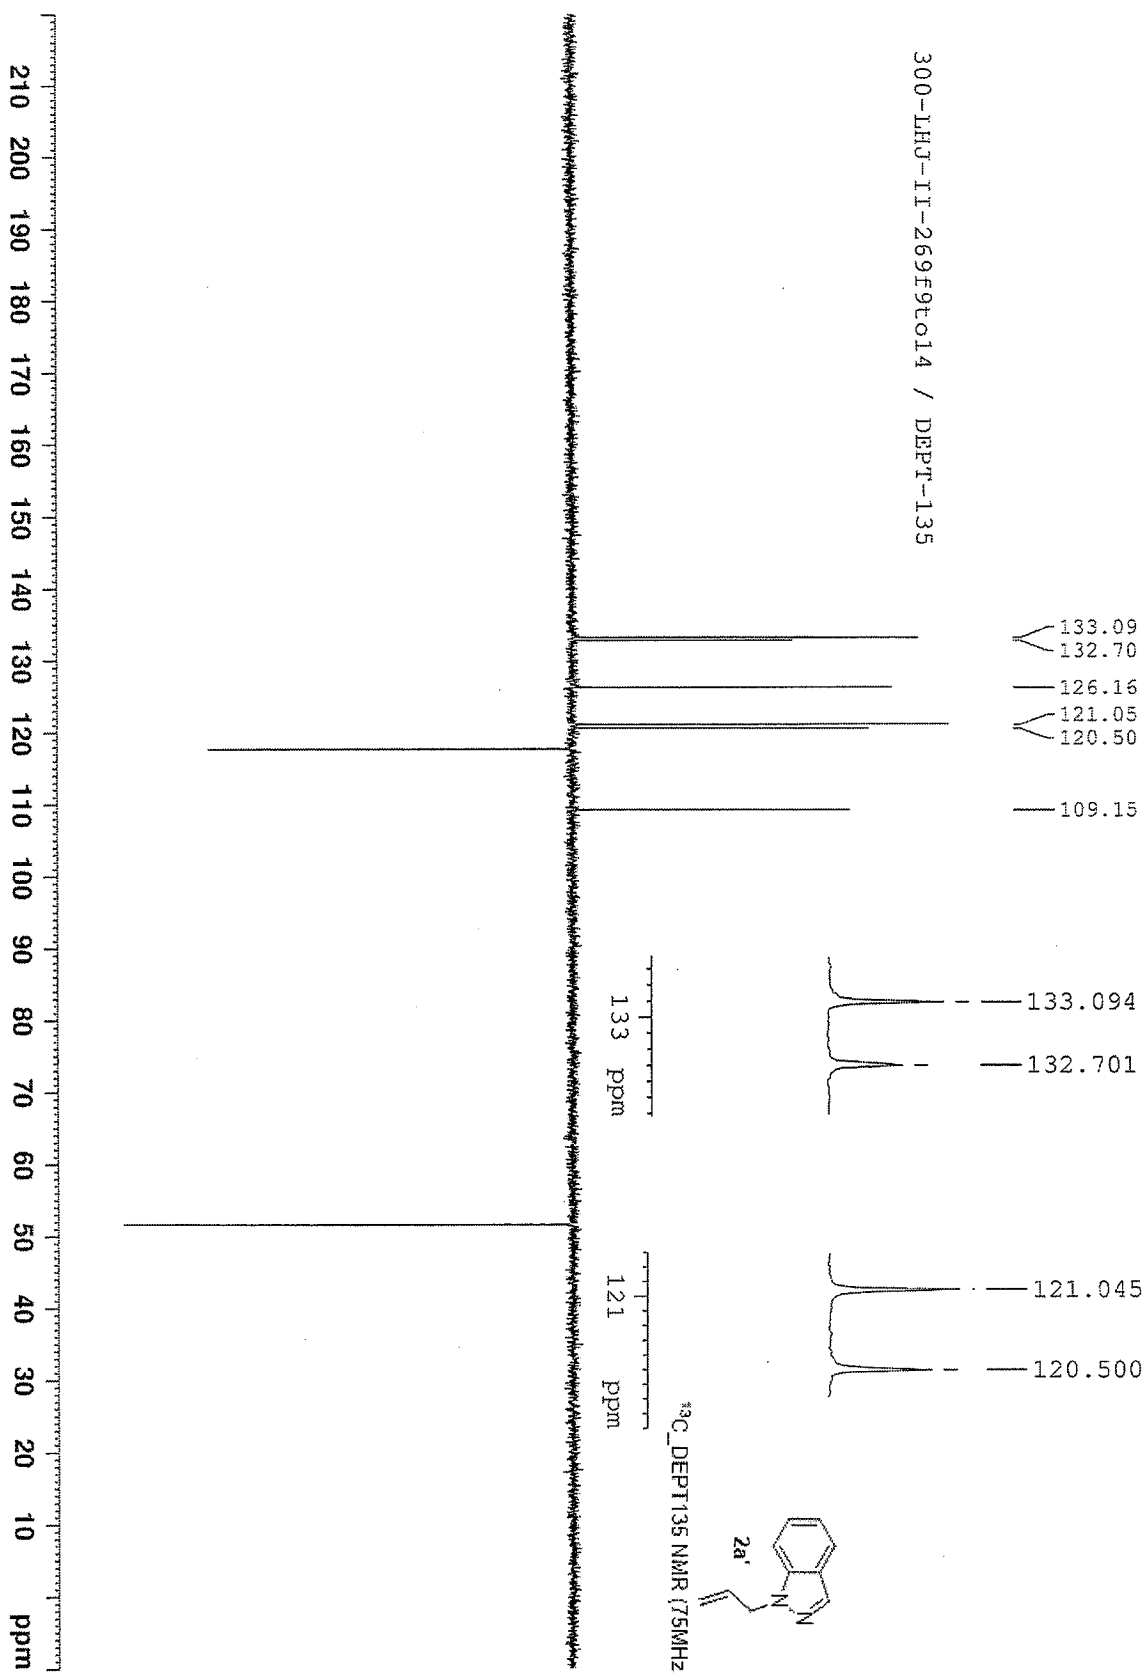

$^{13}\text{C}$  DEPT135 NMR (75MHz,  $\text{CDCl}_3$ )

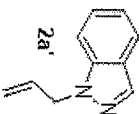



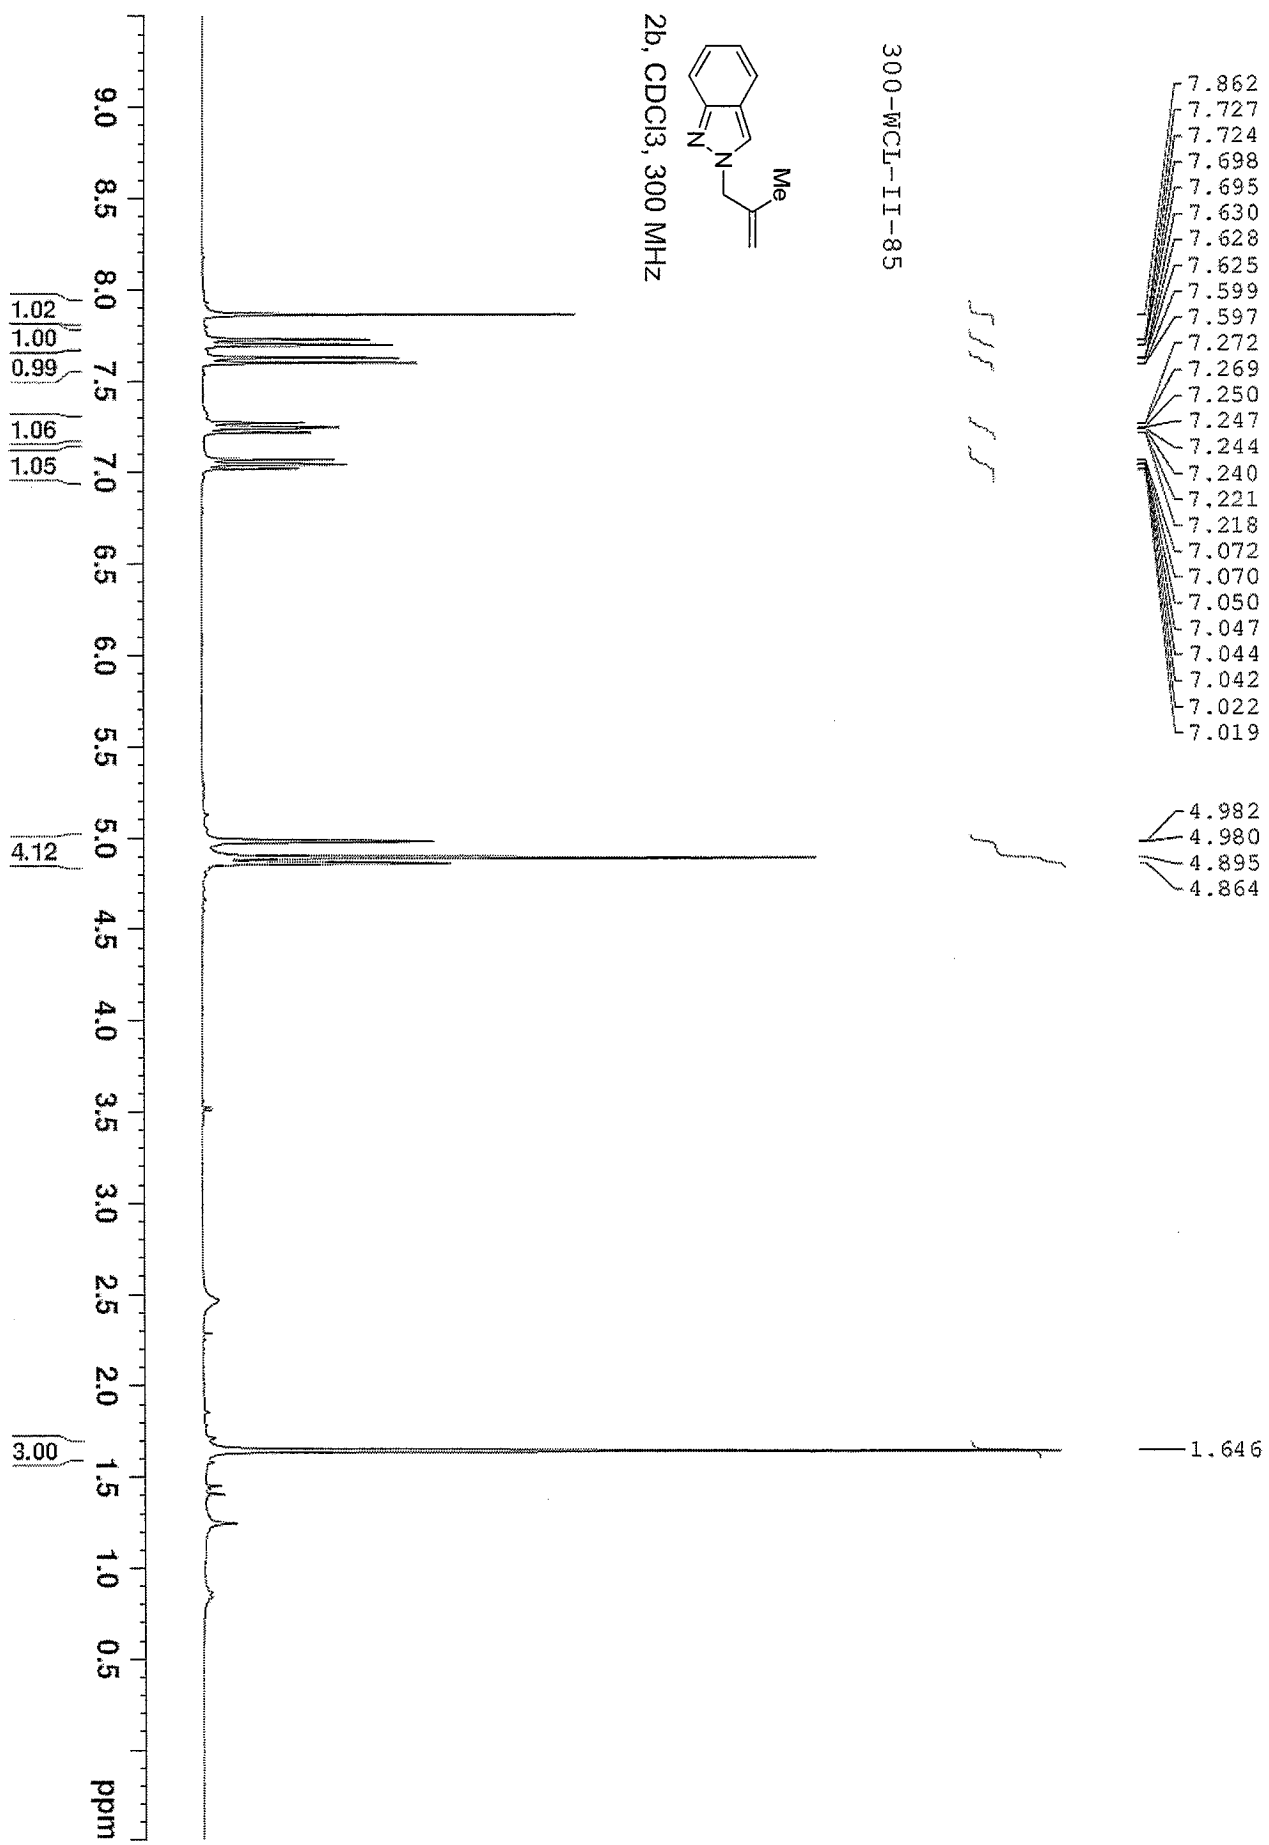

300-WCL-11-85fct2

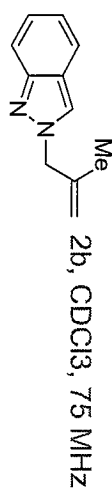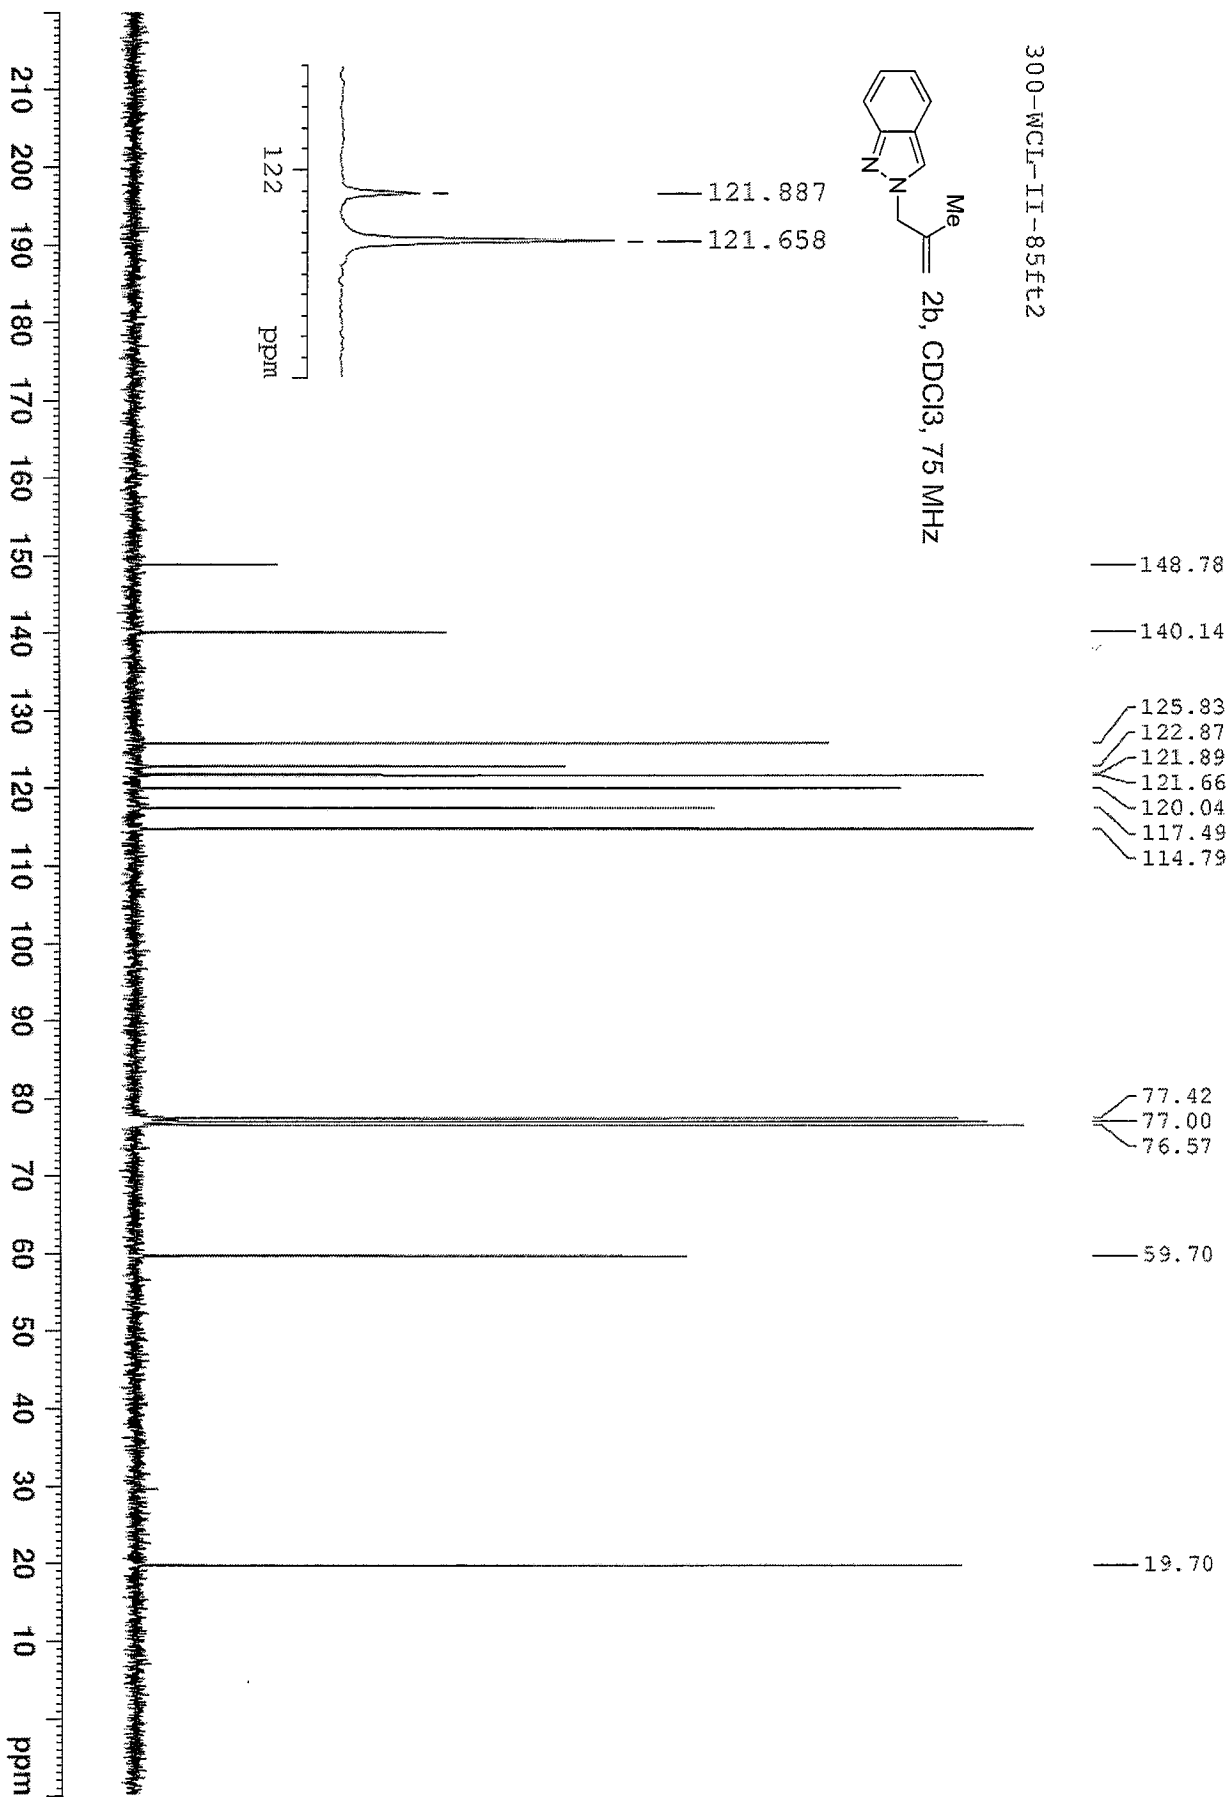

300-WCL-II-85FTL2 (HMBC)

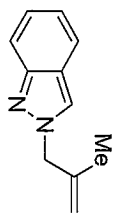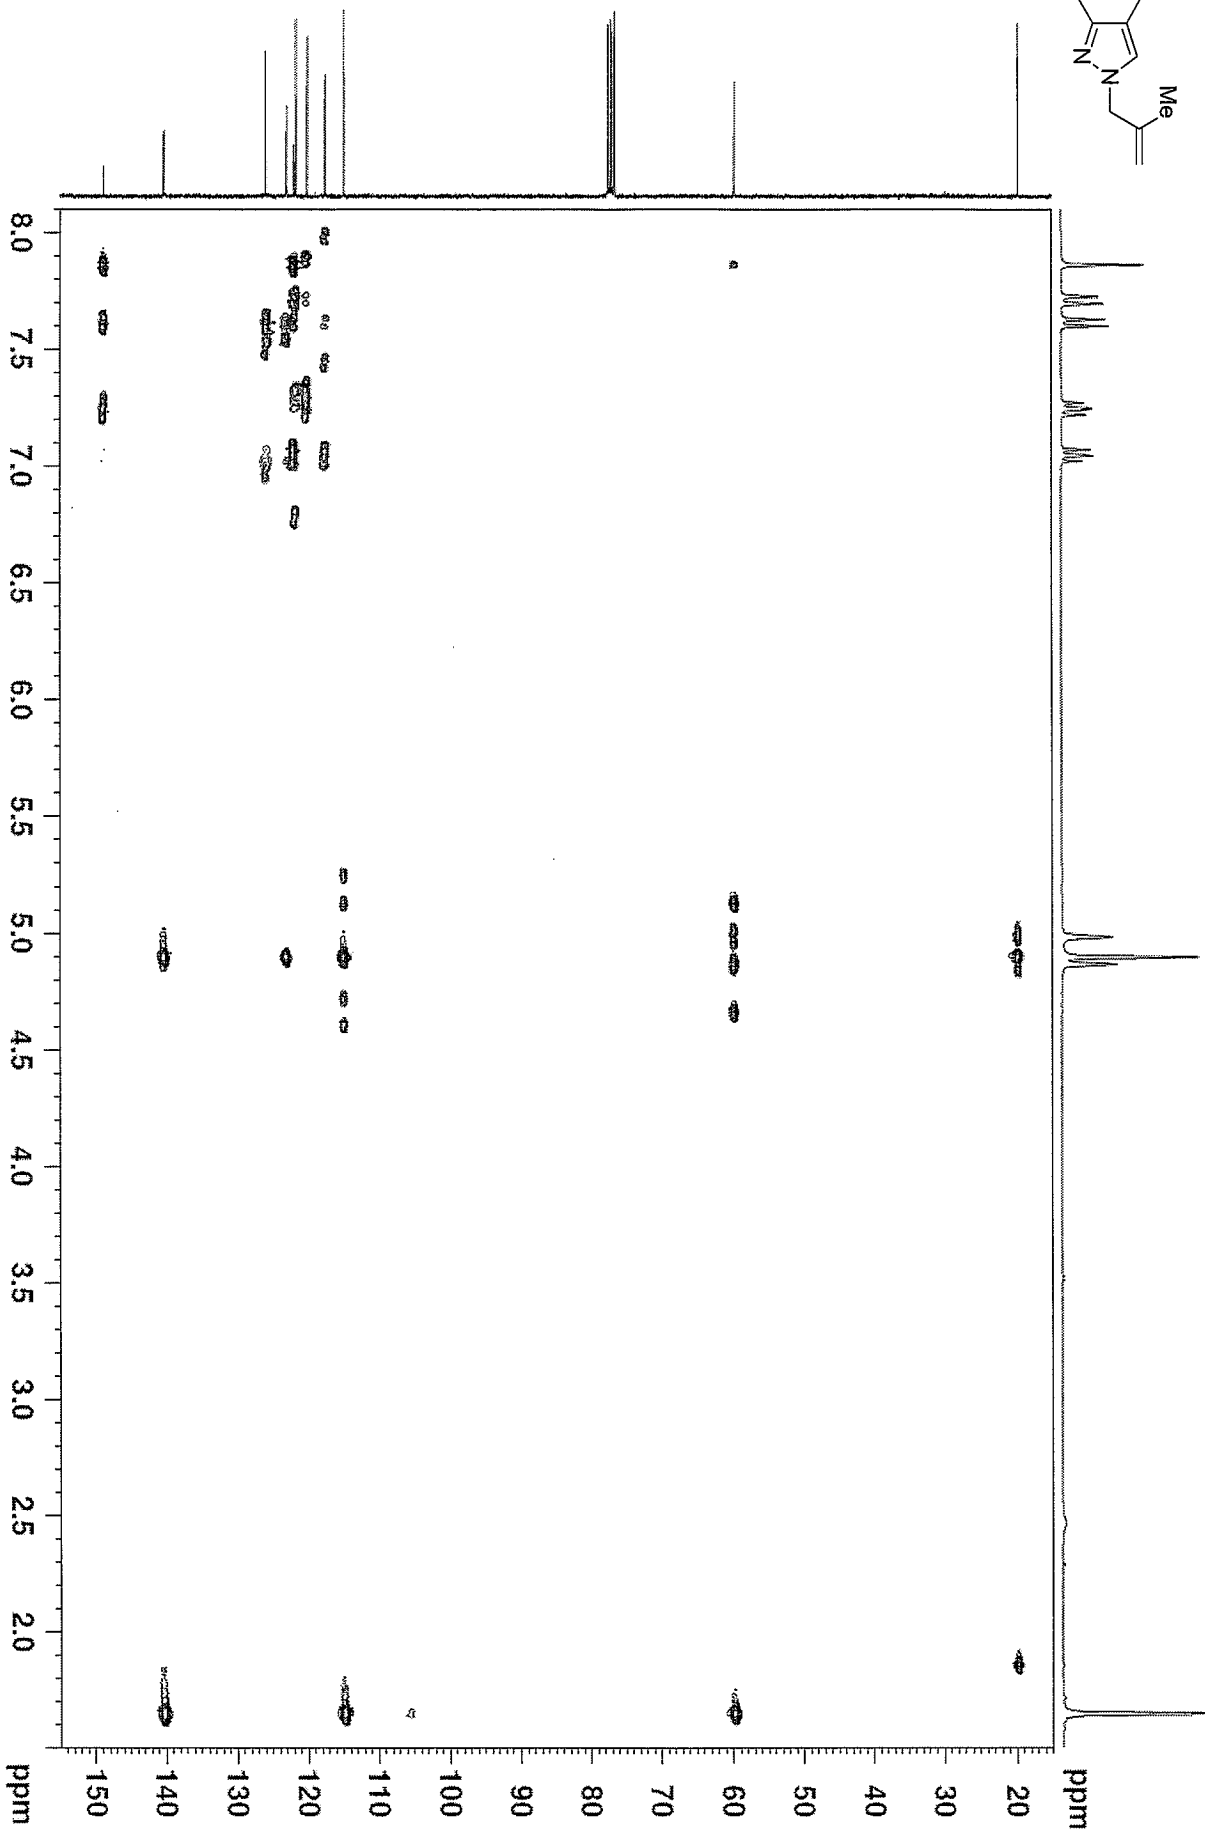

300-WCL-II-85ft2 (HSQC)

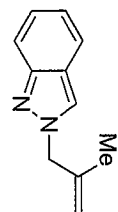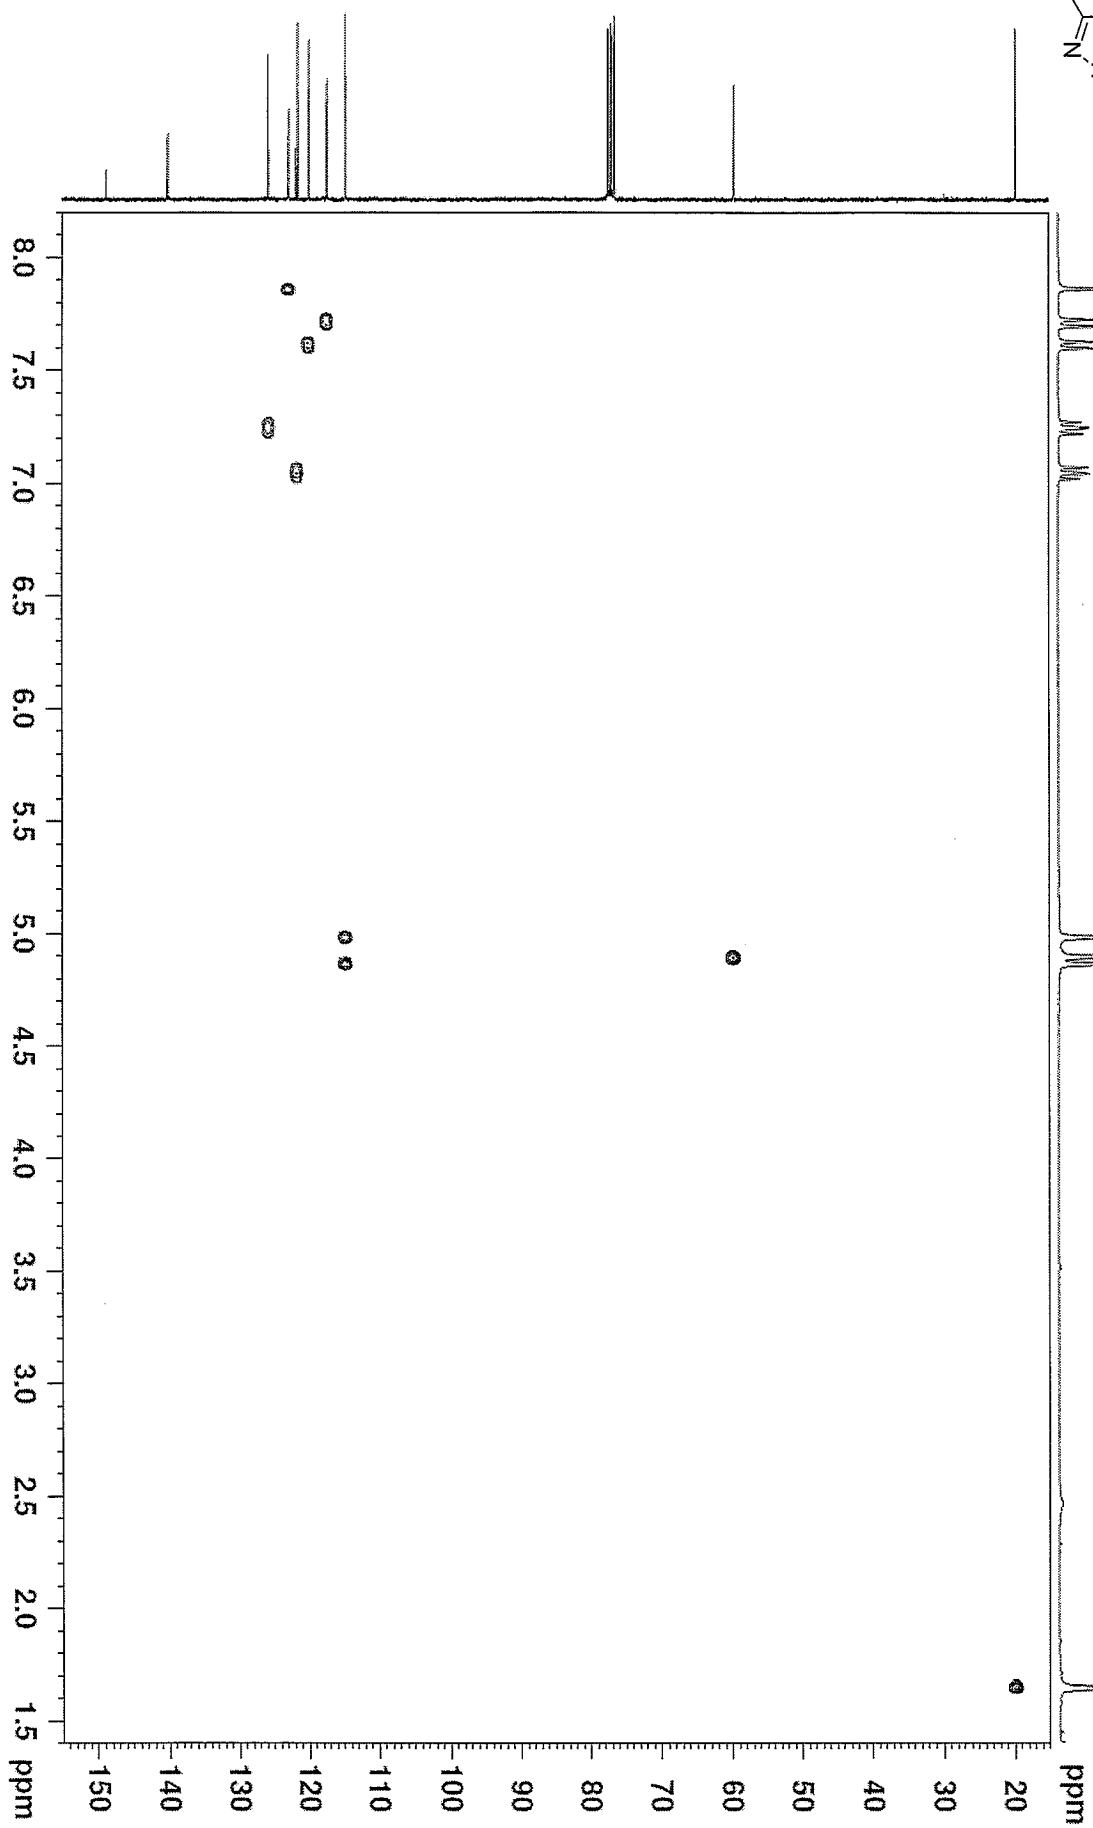

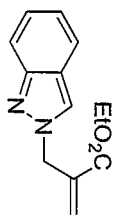

300-CKK-I-120F18t049

2c, CDCl<sub>3</sub>, 300 MHz

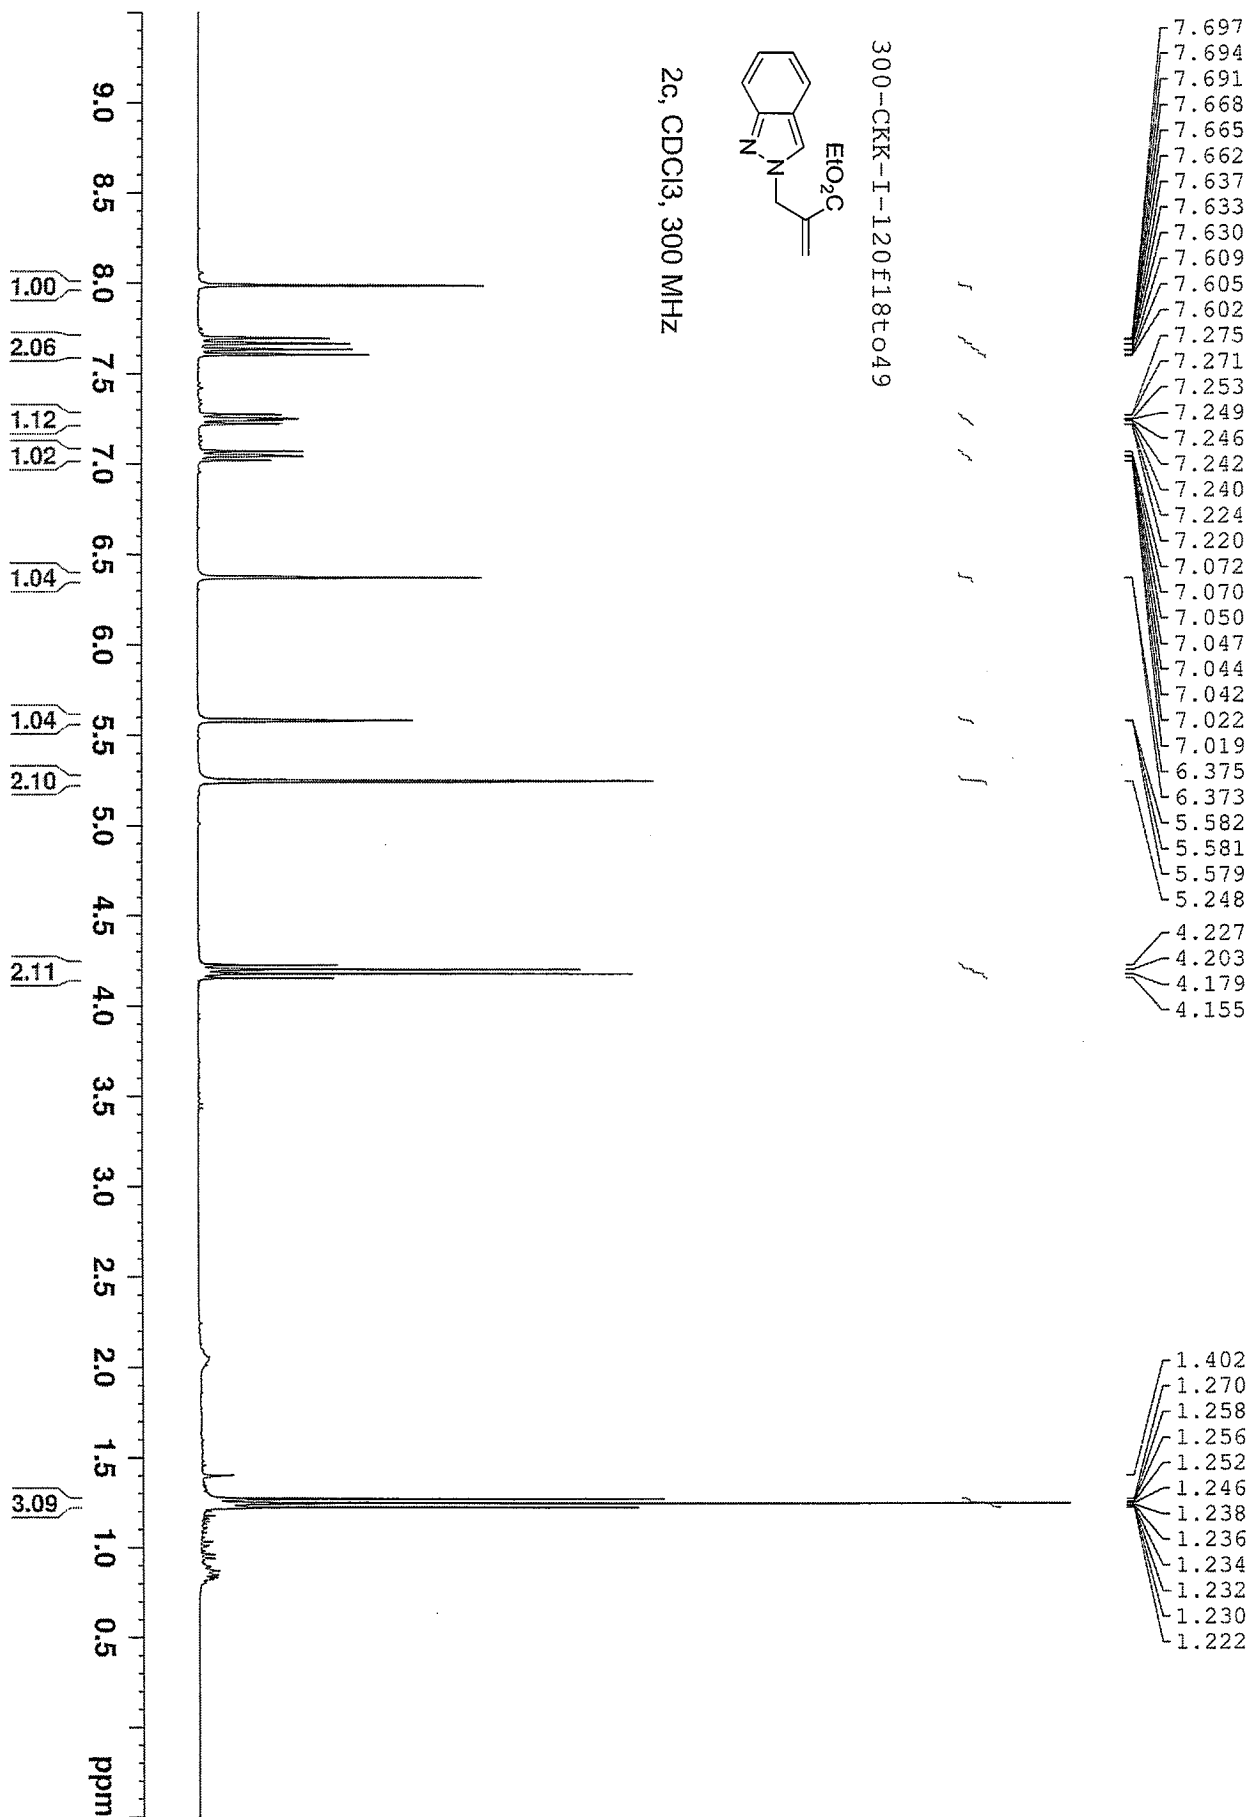

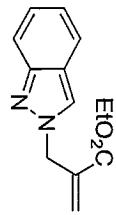

2c, CDCl<sub>3</sub>, 75 MHz

300-CKK-I-117purity (C13)

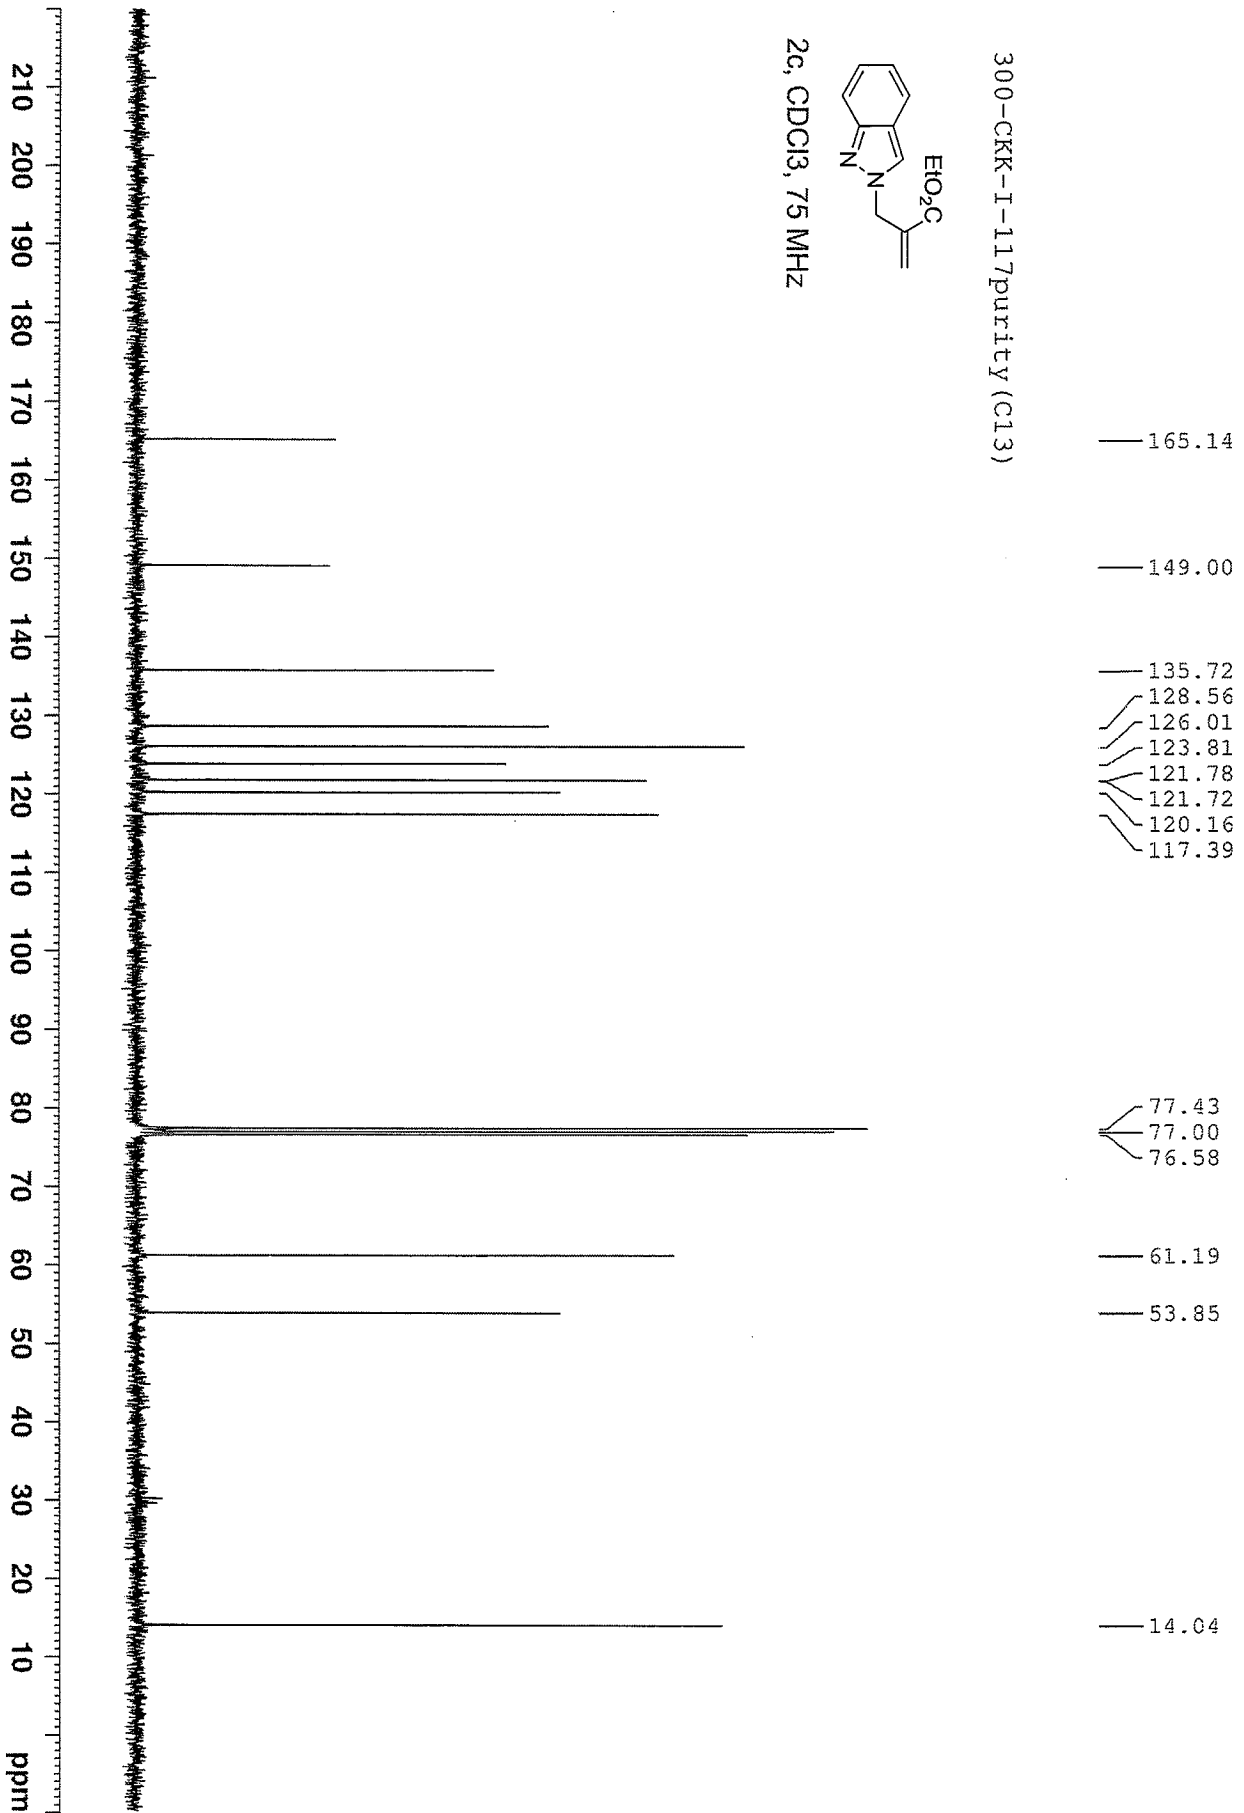

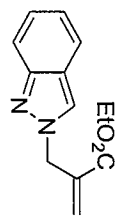

300-CKK-I-120purity (HSQC)

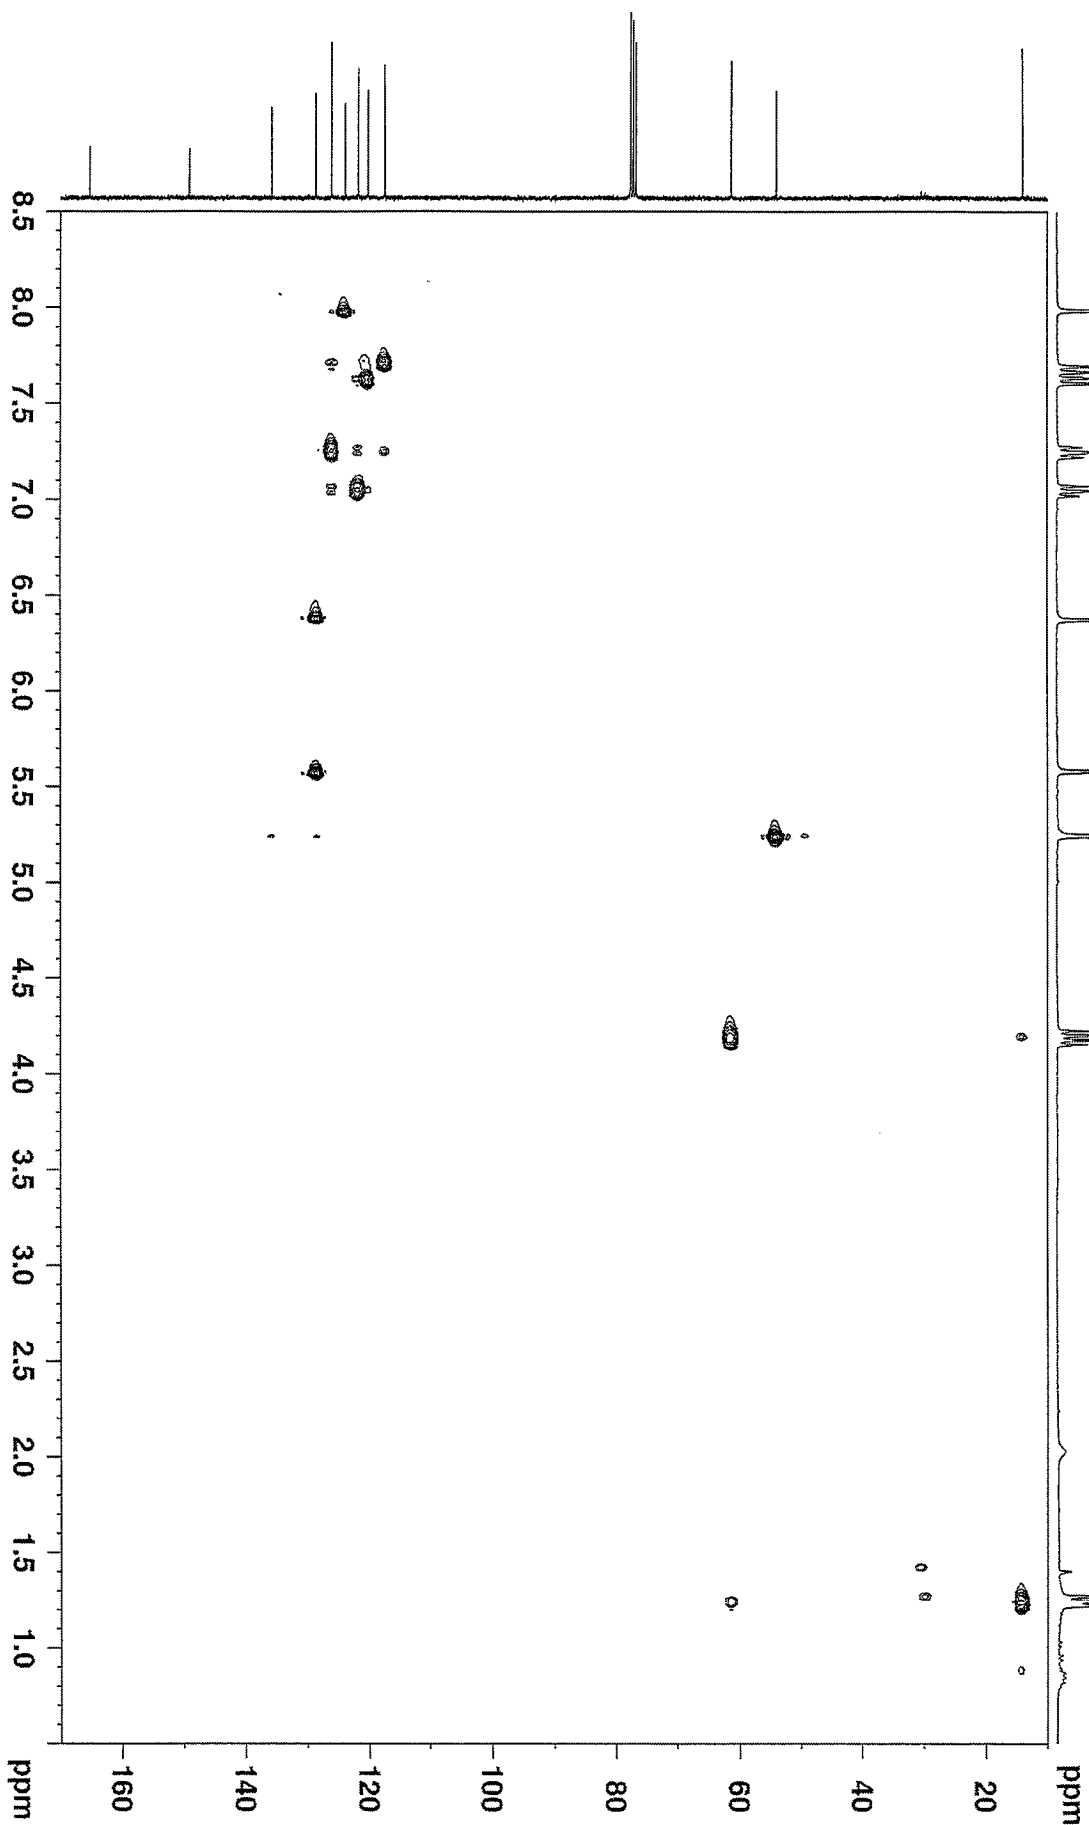

300-CKK-I-120purity (HMBC)

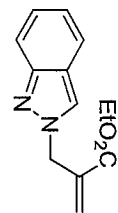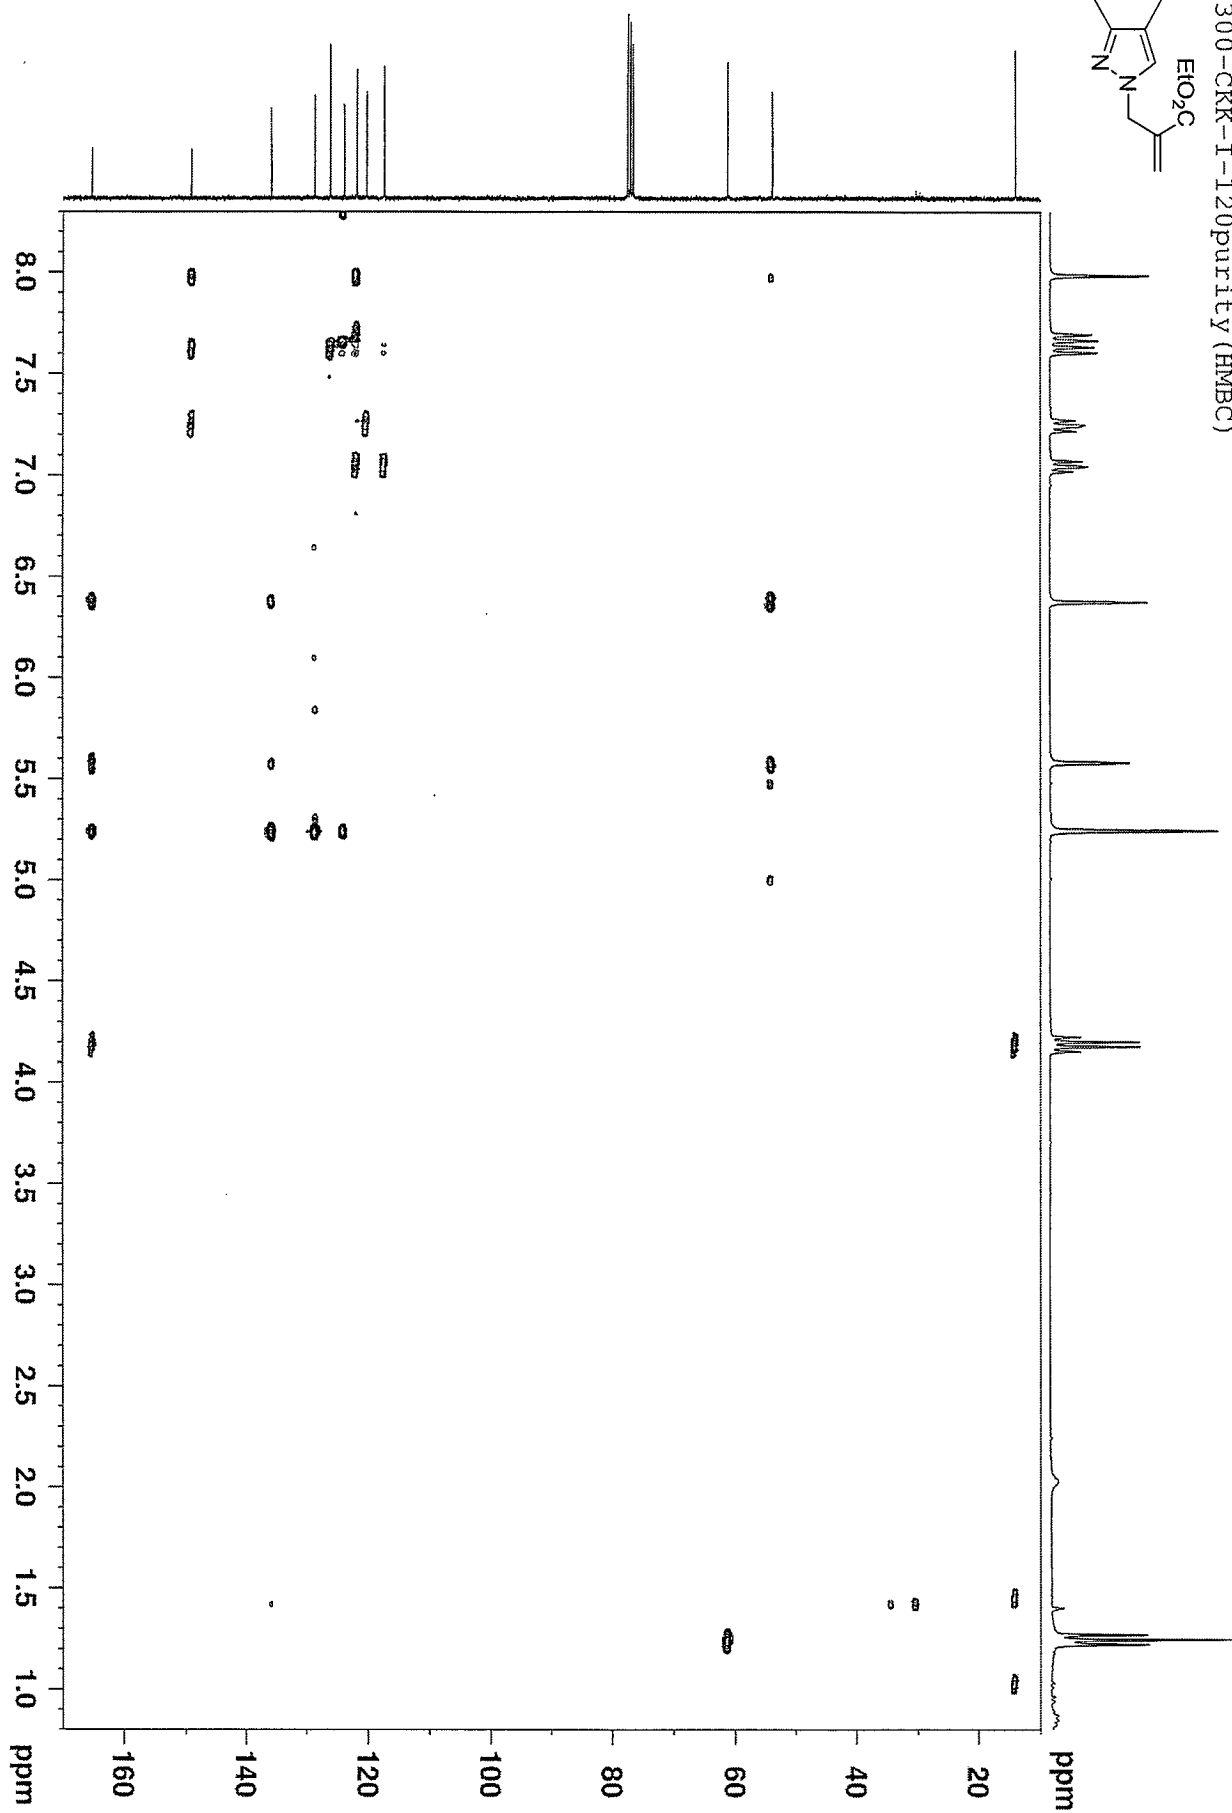



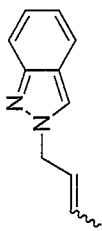

2d, CDCl<sub>3</sub>, 300 MHz

300-LHJ-III-38f11to26

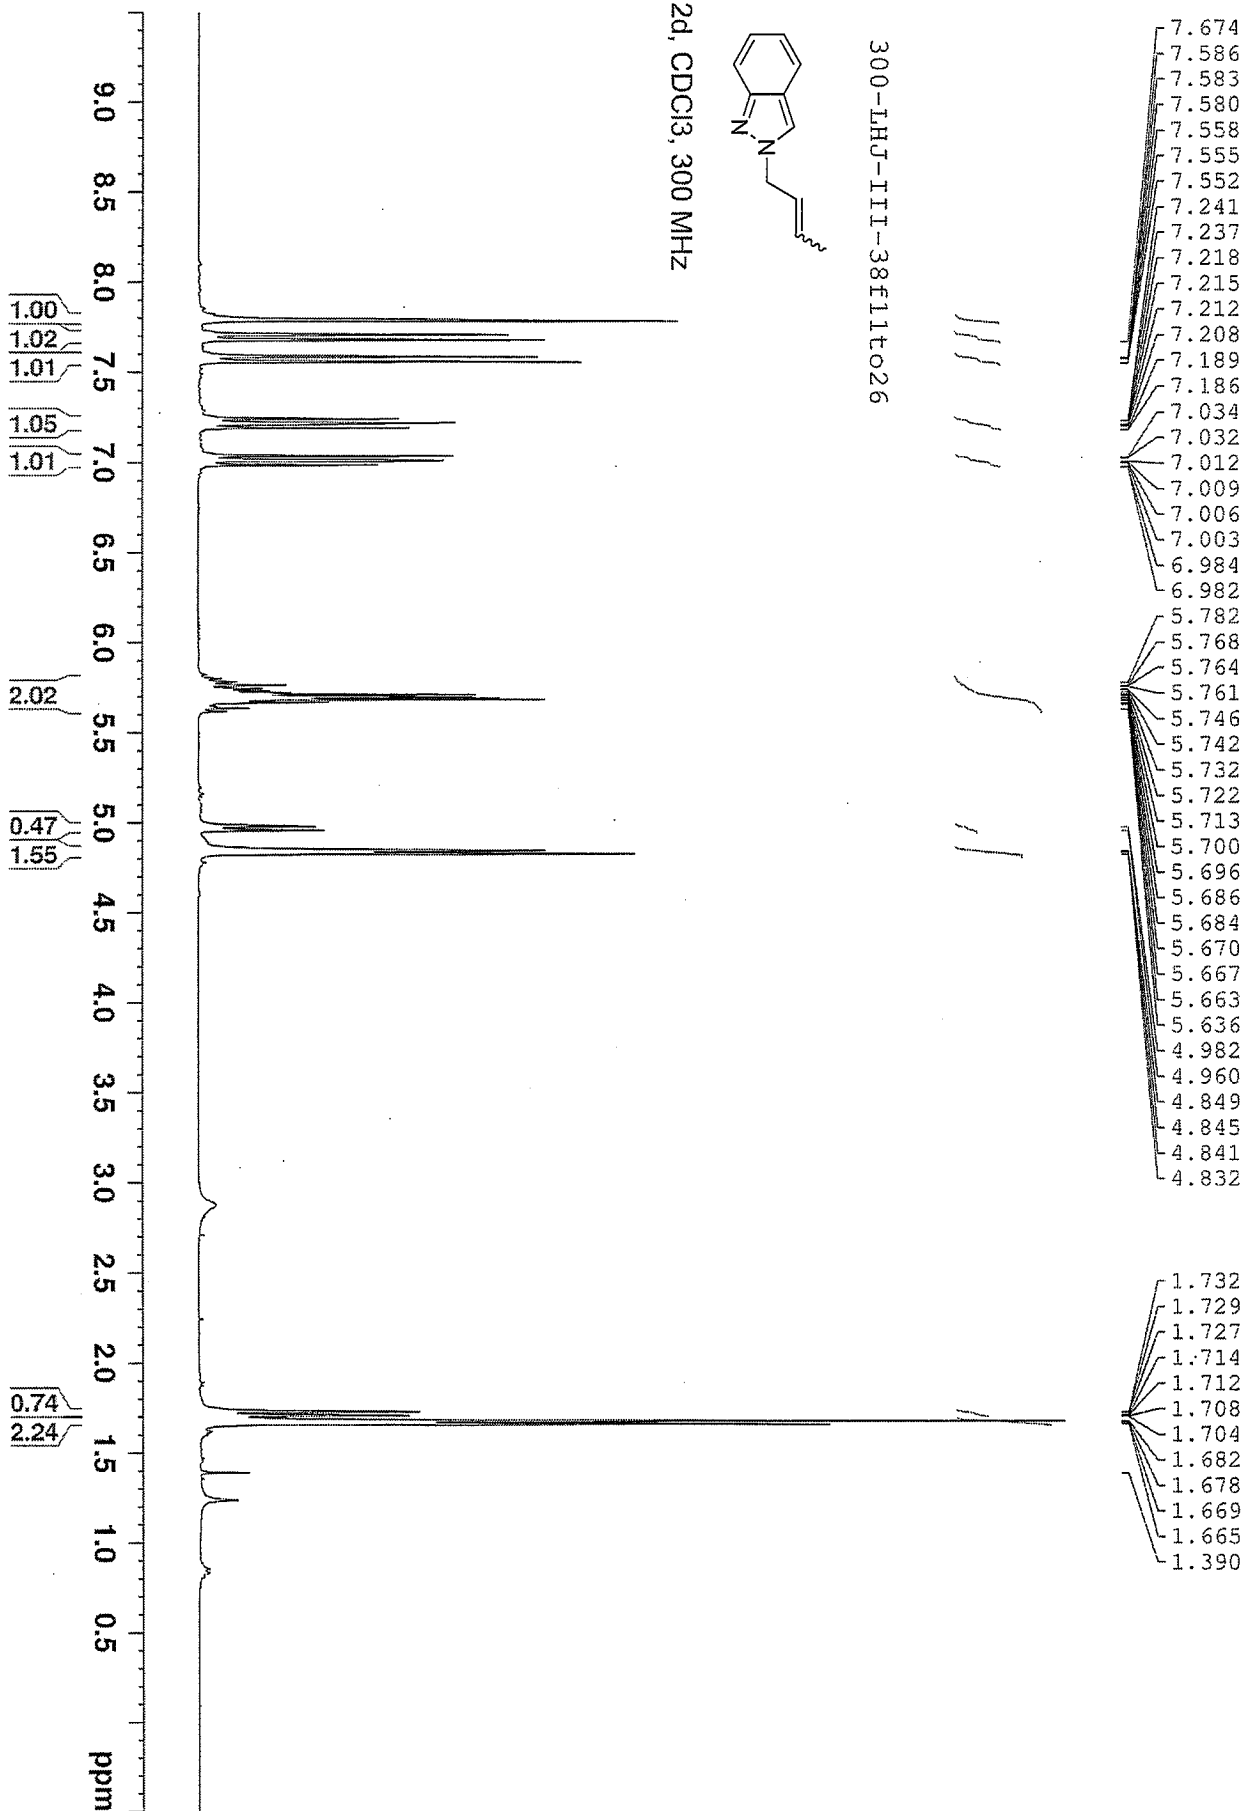

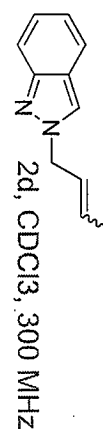

300-LHJ-III-38F11tO

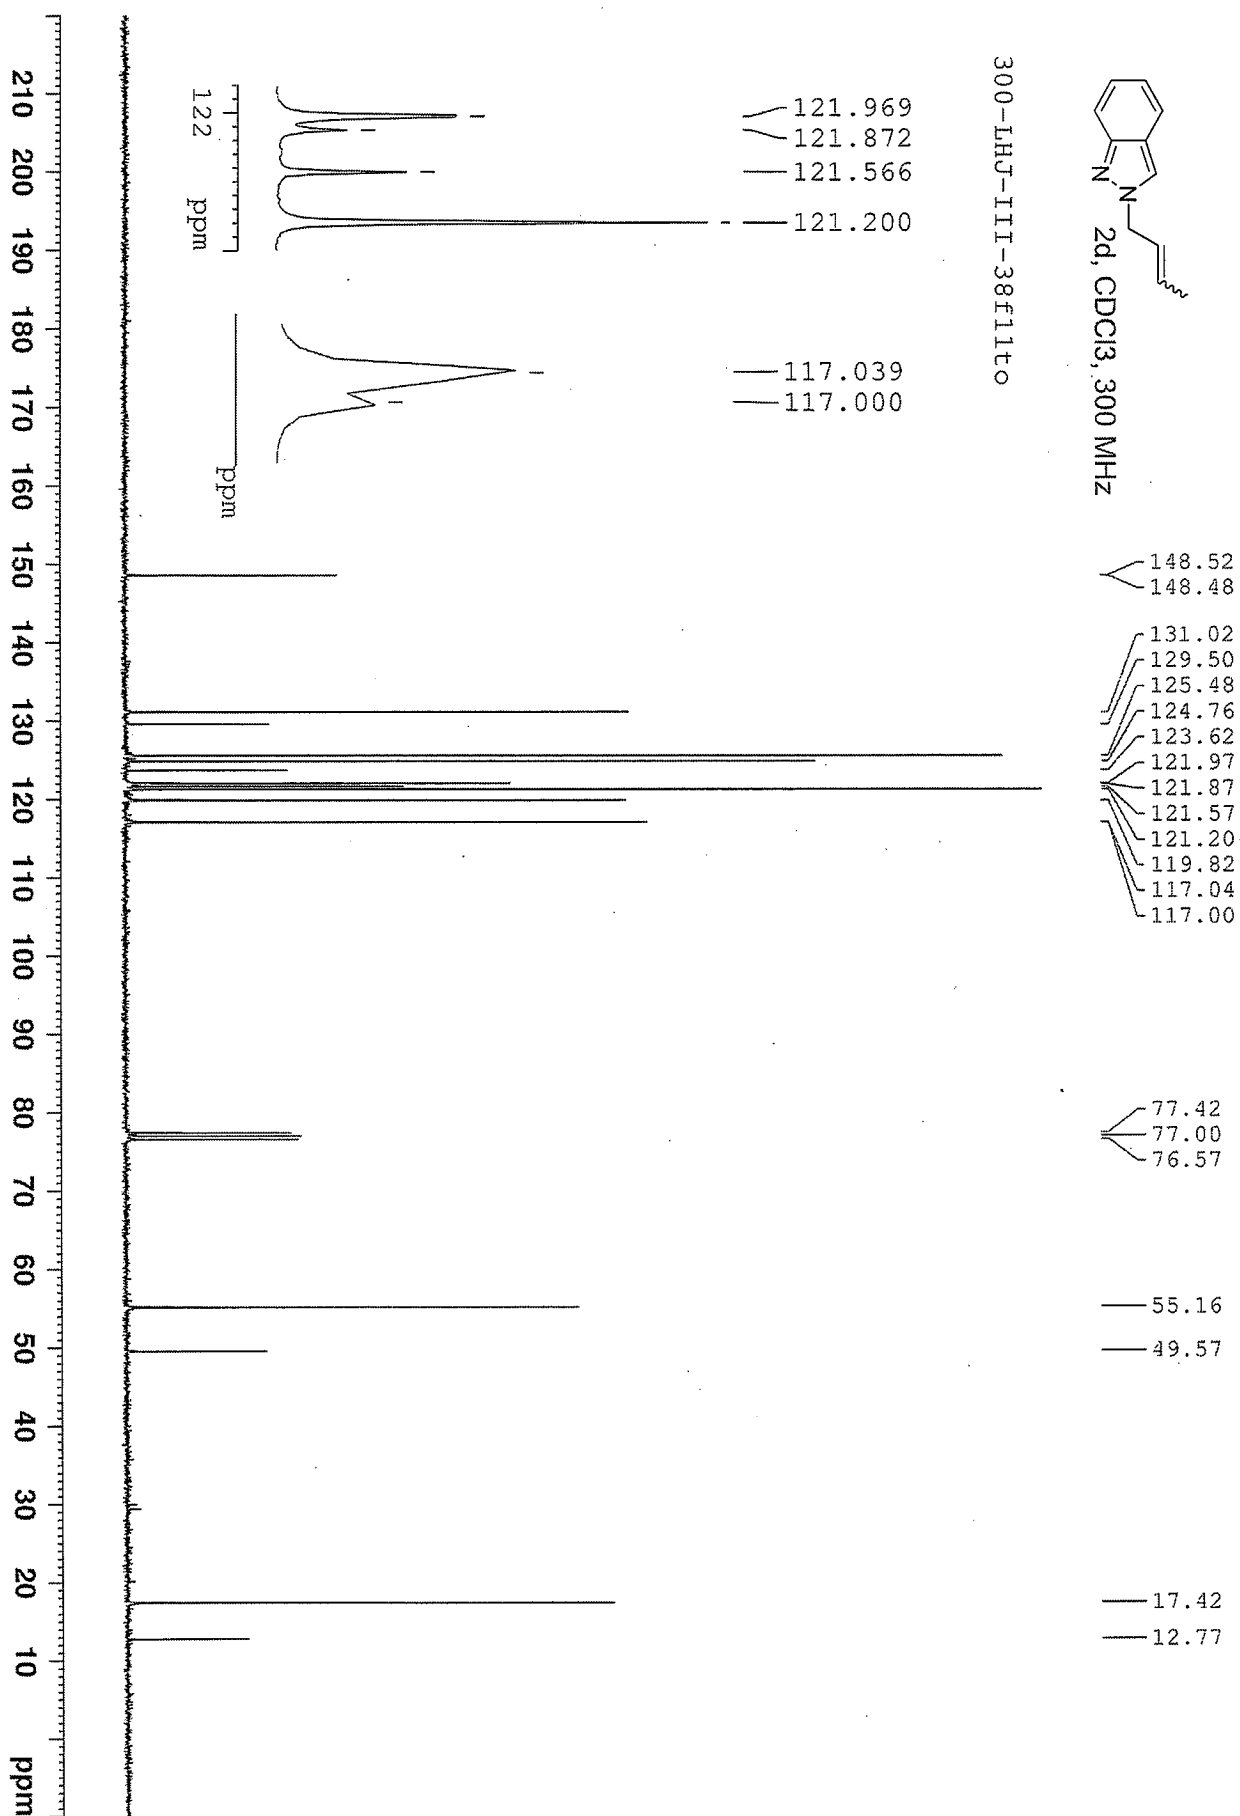

300-LHJ-III-38F11to26 (HSQC)

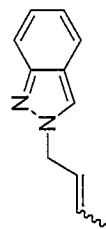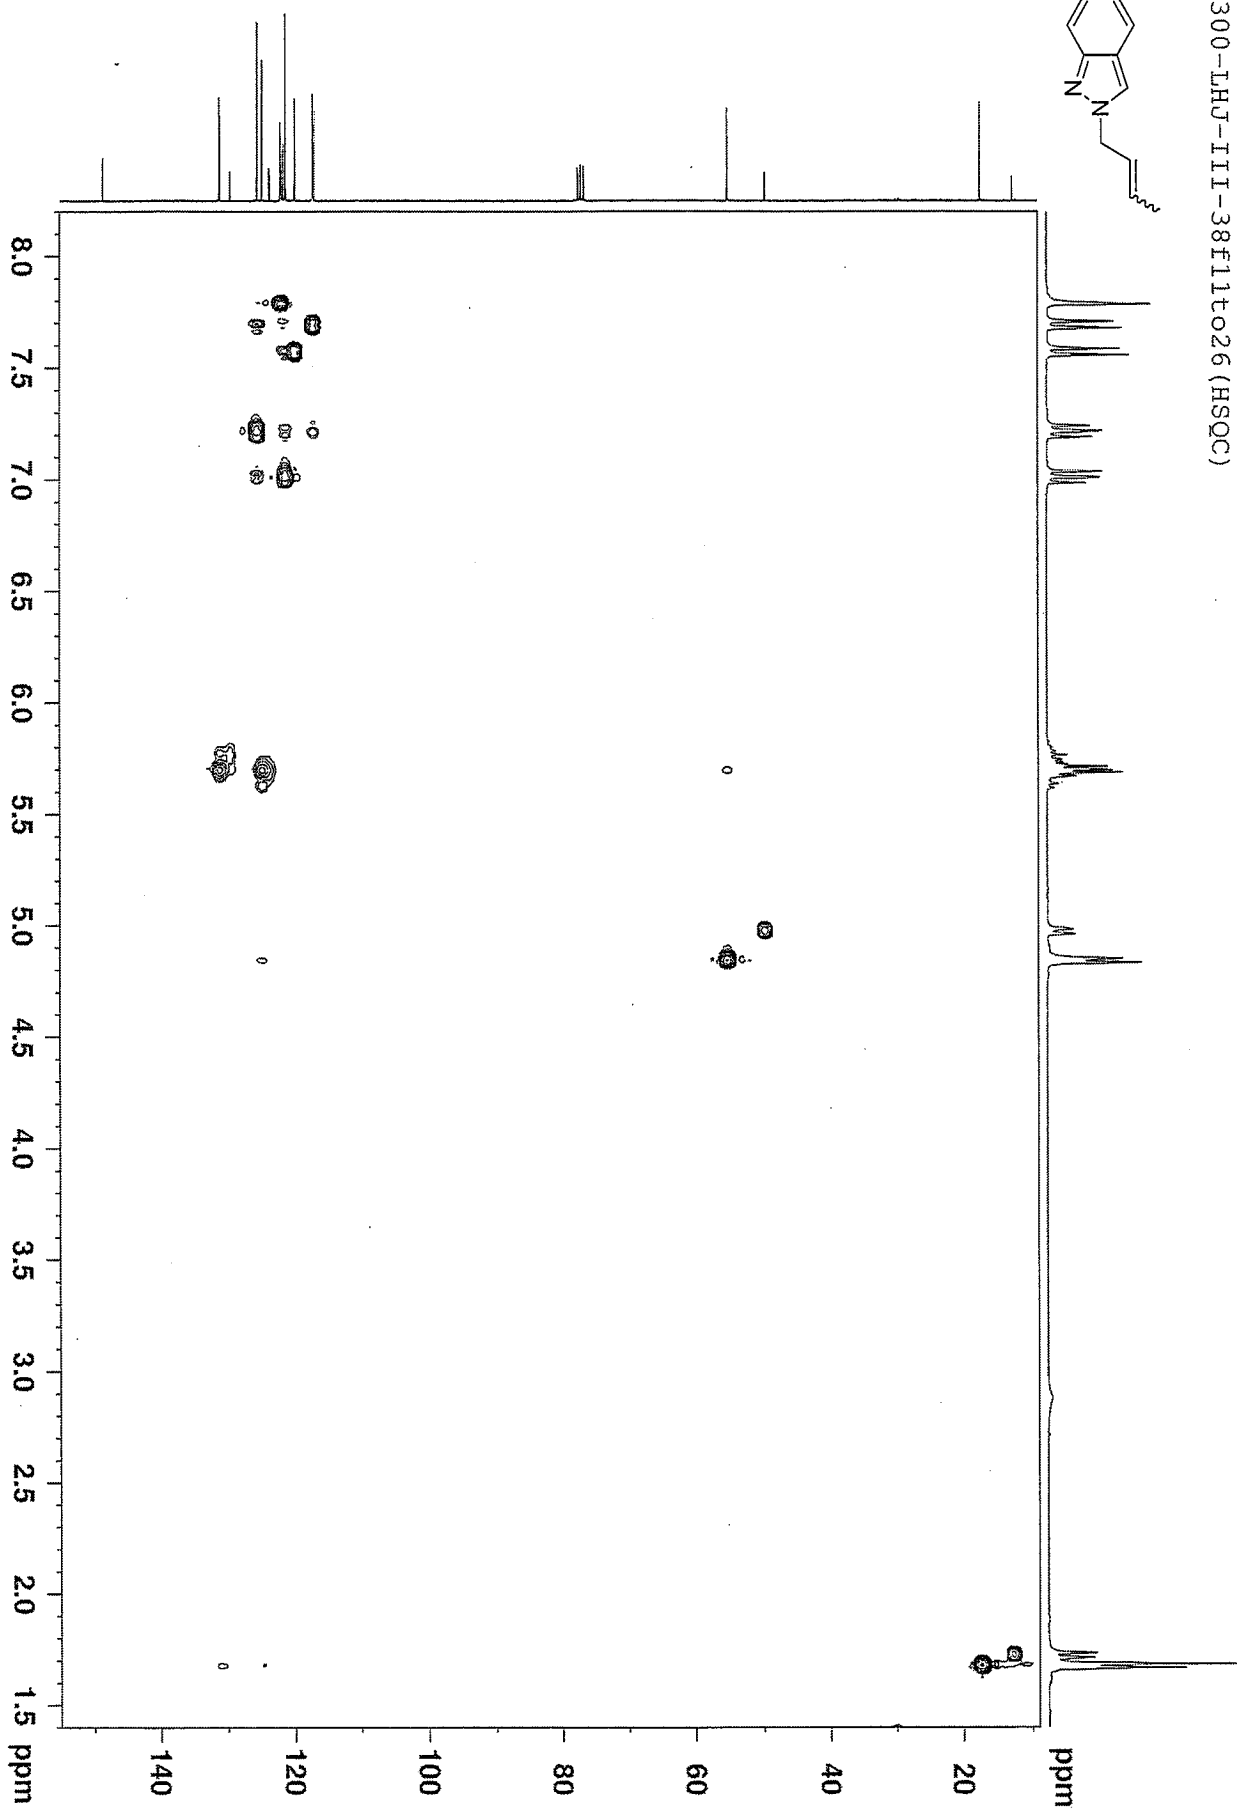

300-LHJ-III-38F11to26 (HMBC)

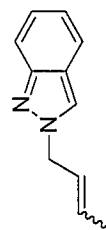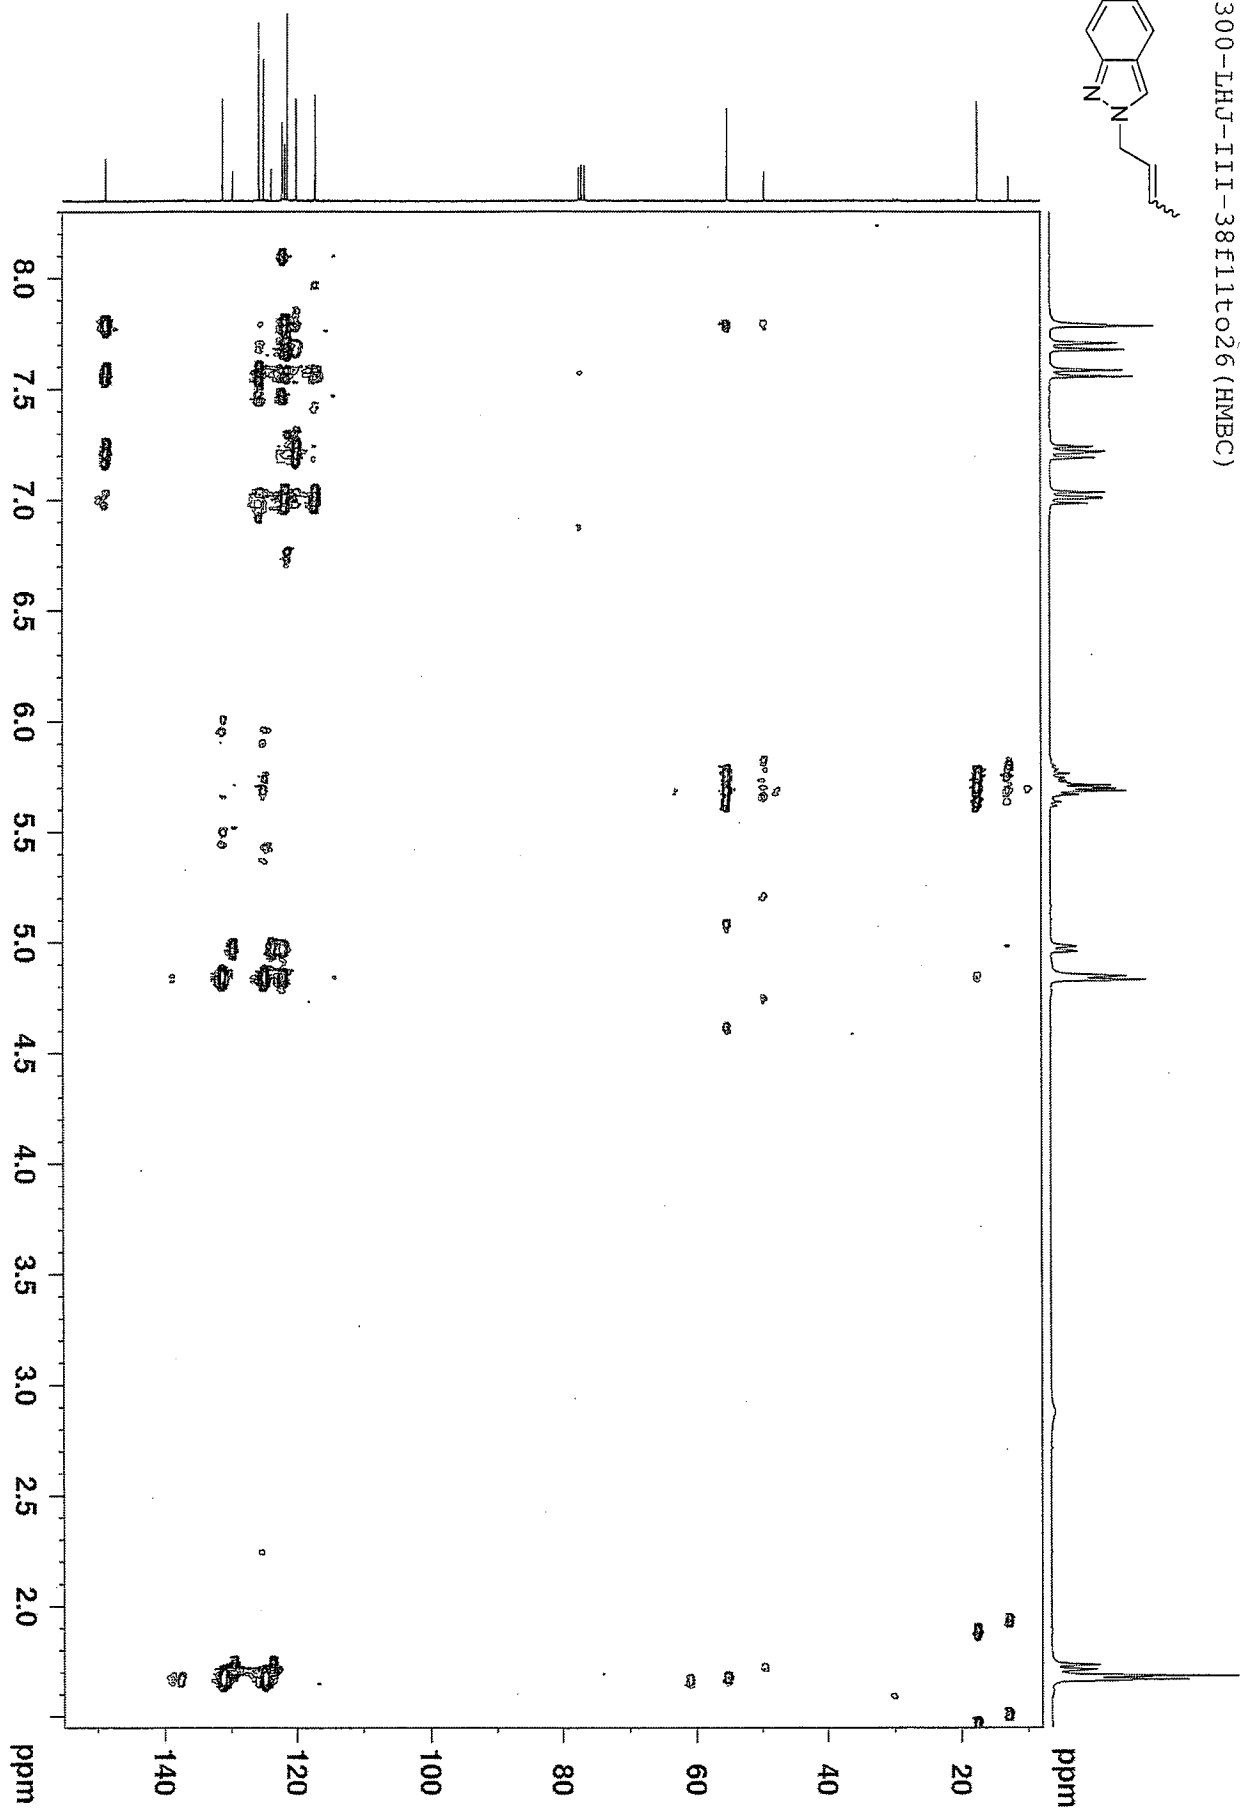

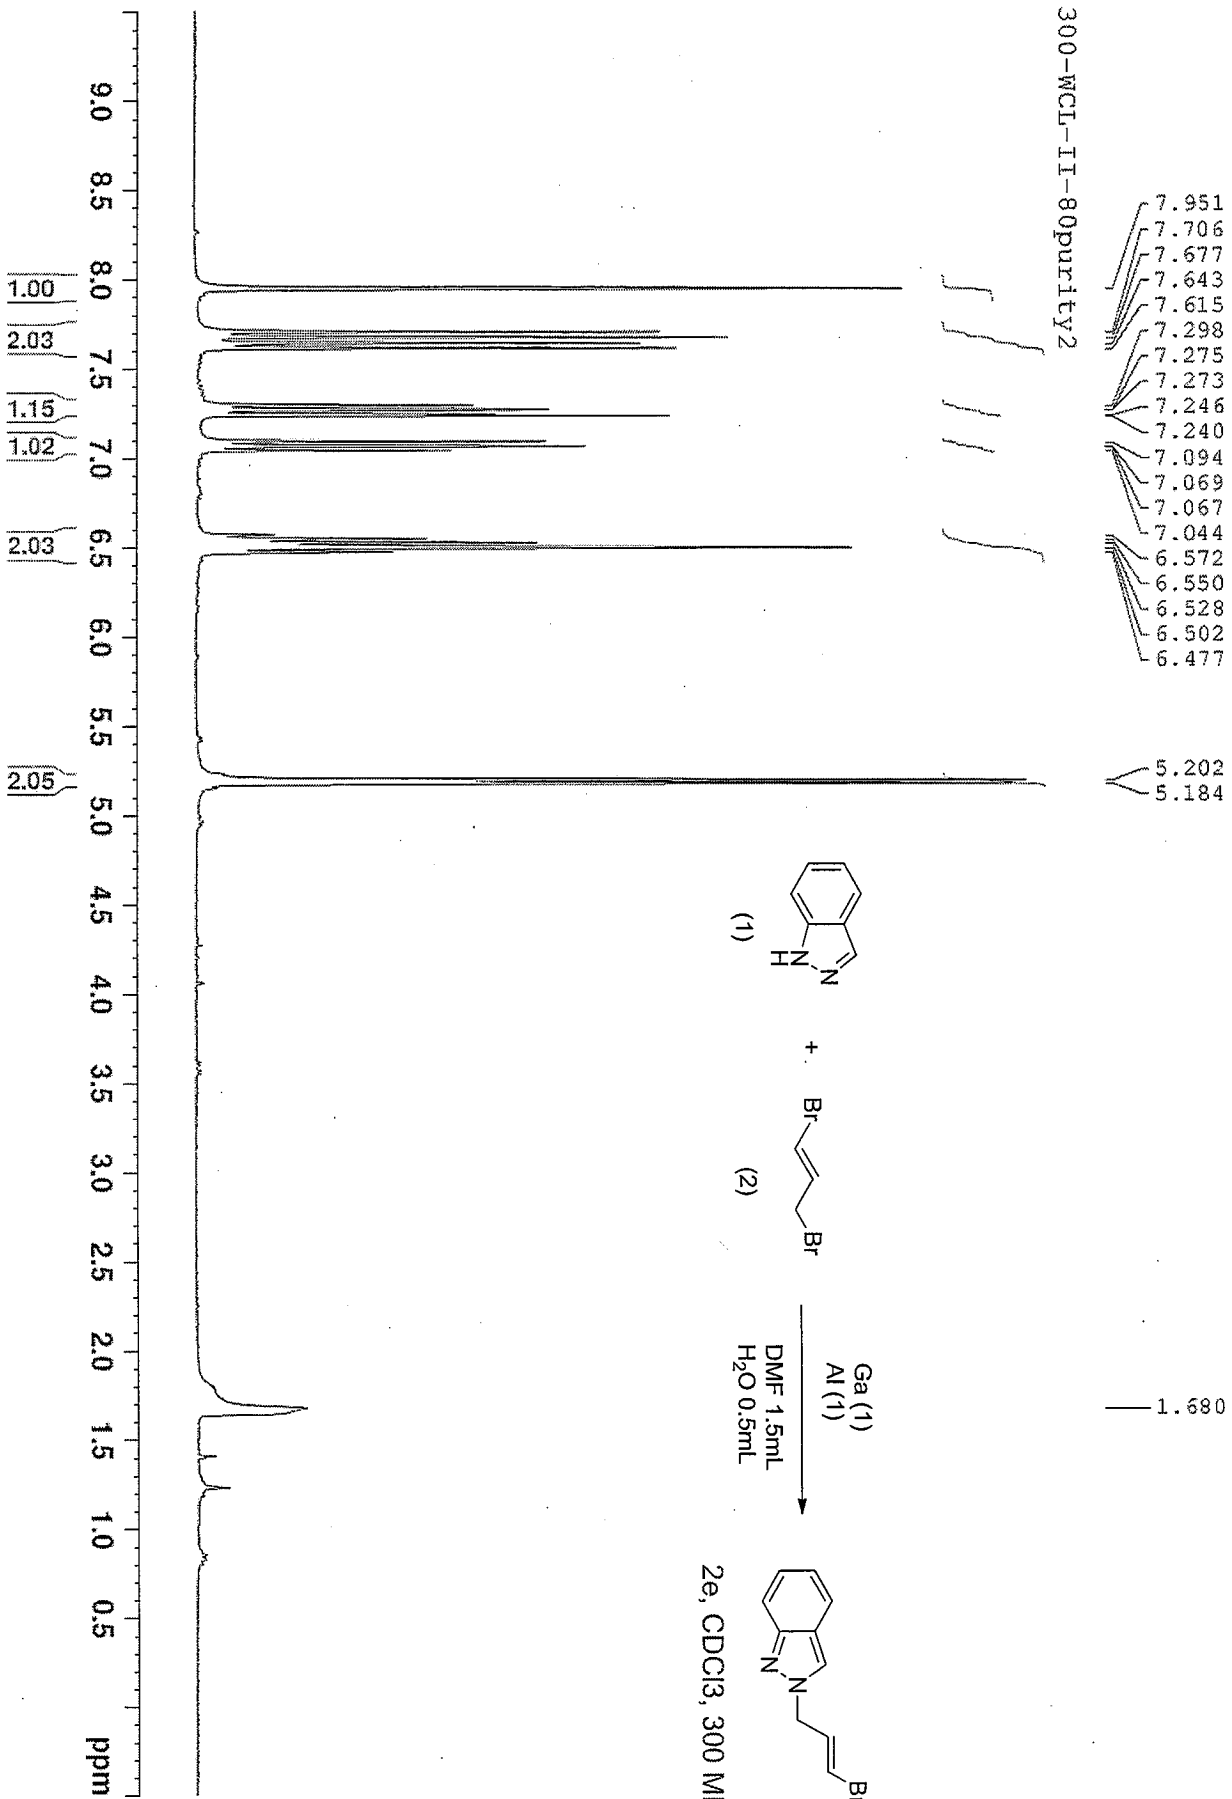

300-WCL-II-80purity

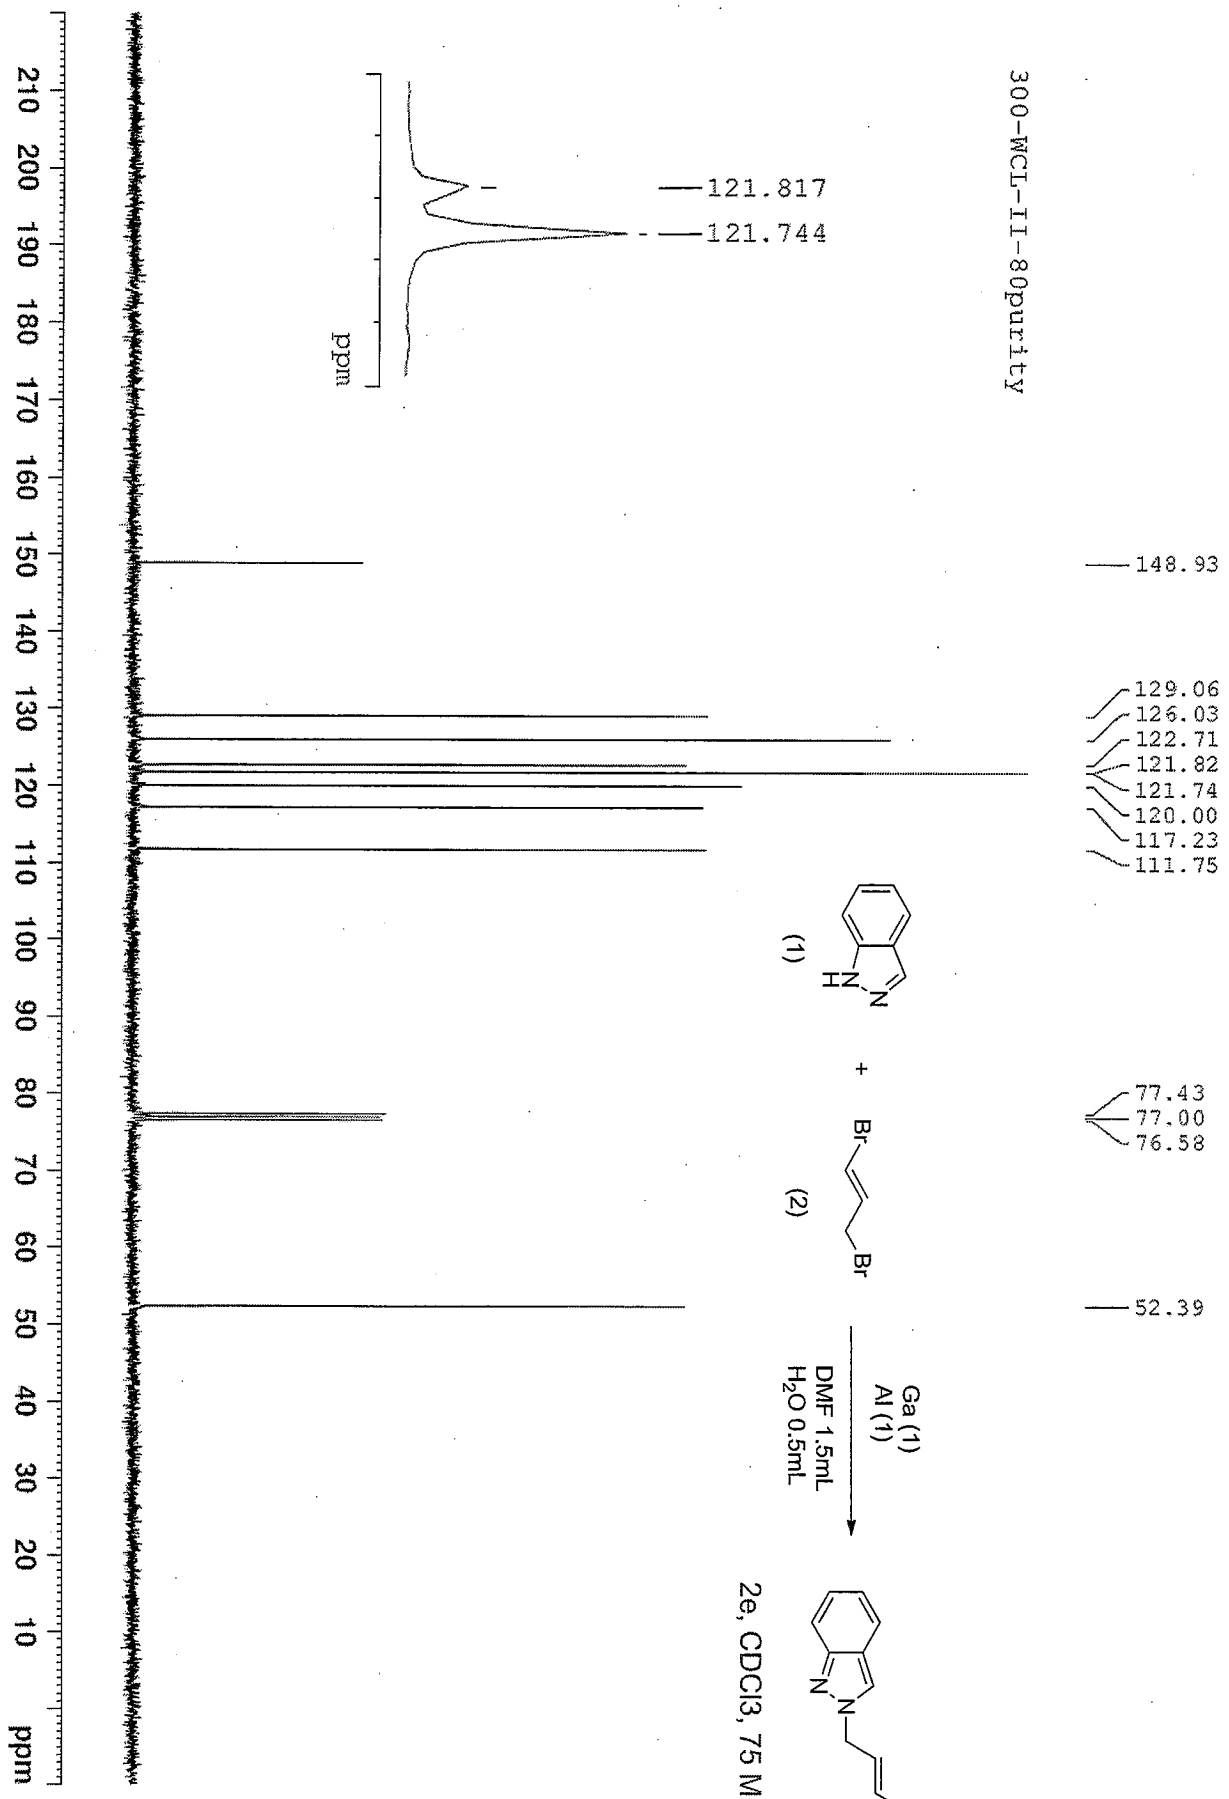

300-MCL-II-80purity (HMBC)

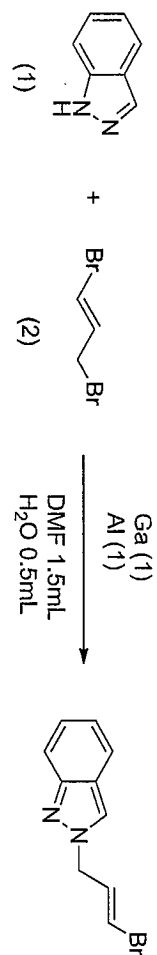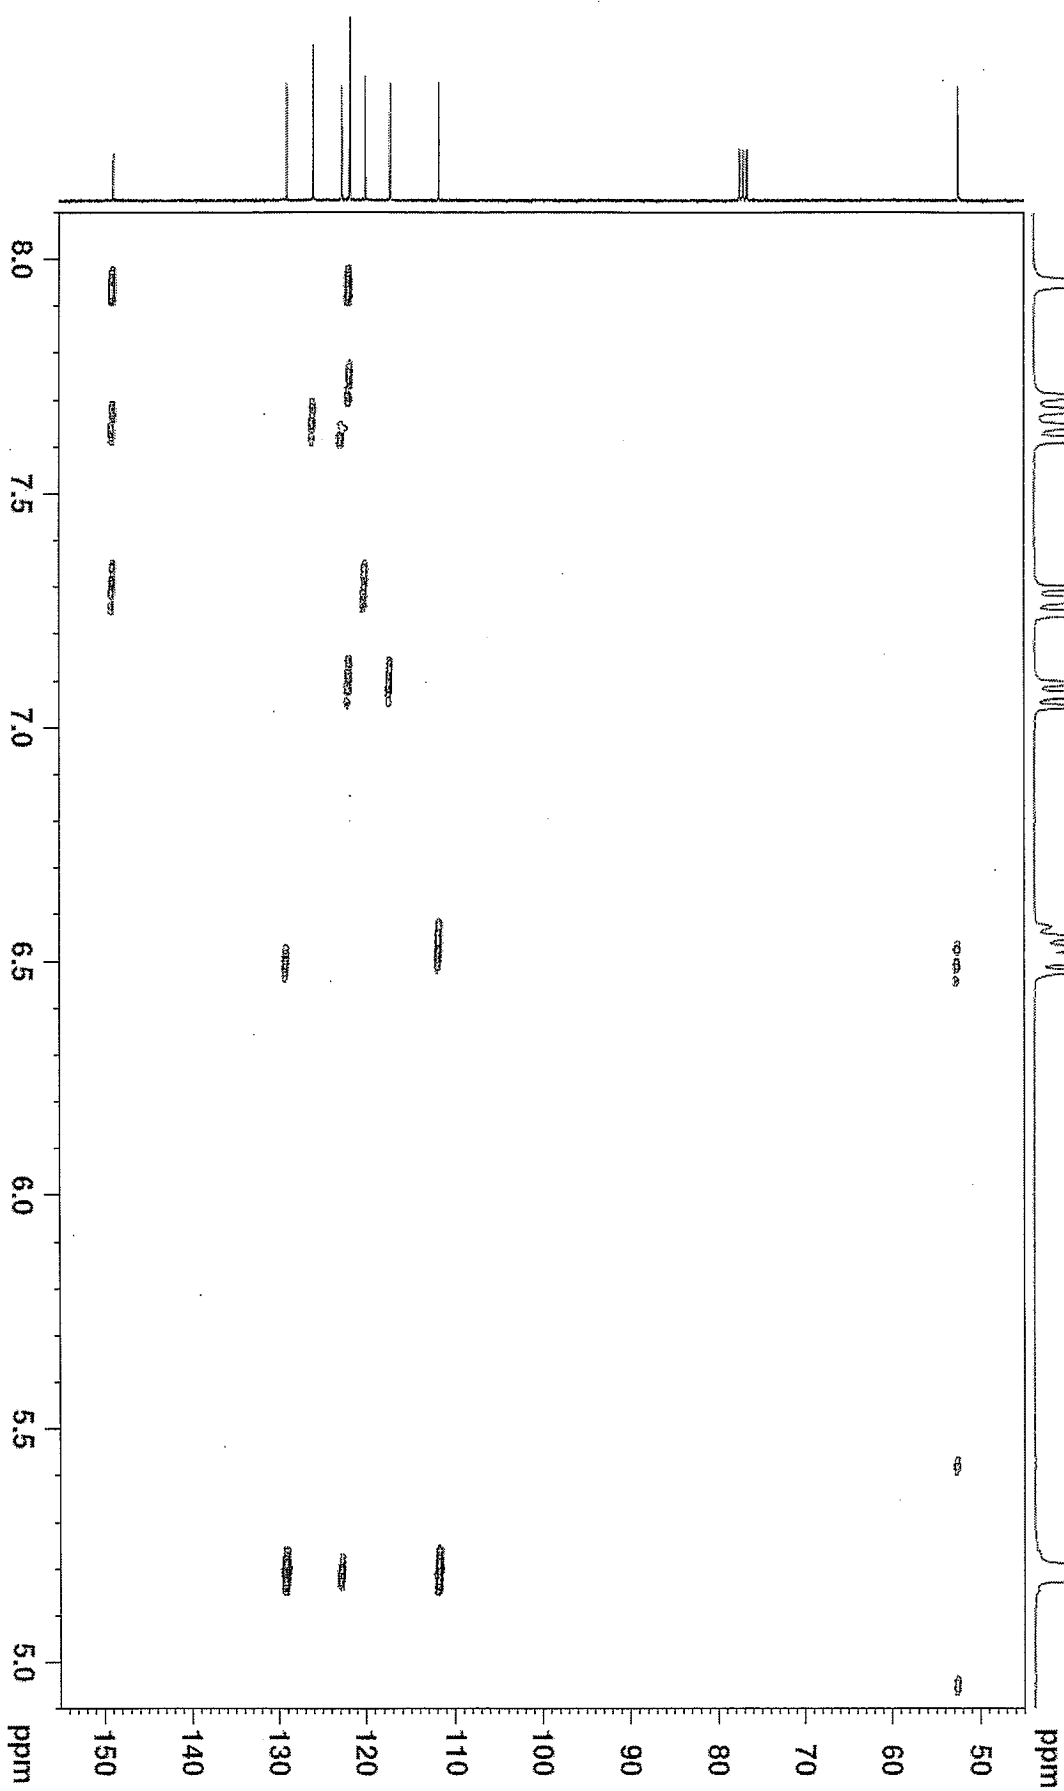

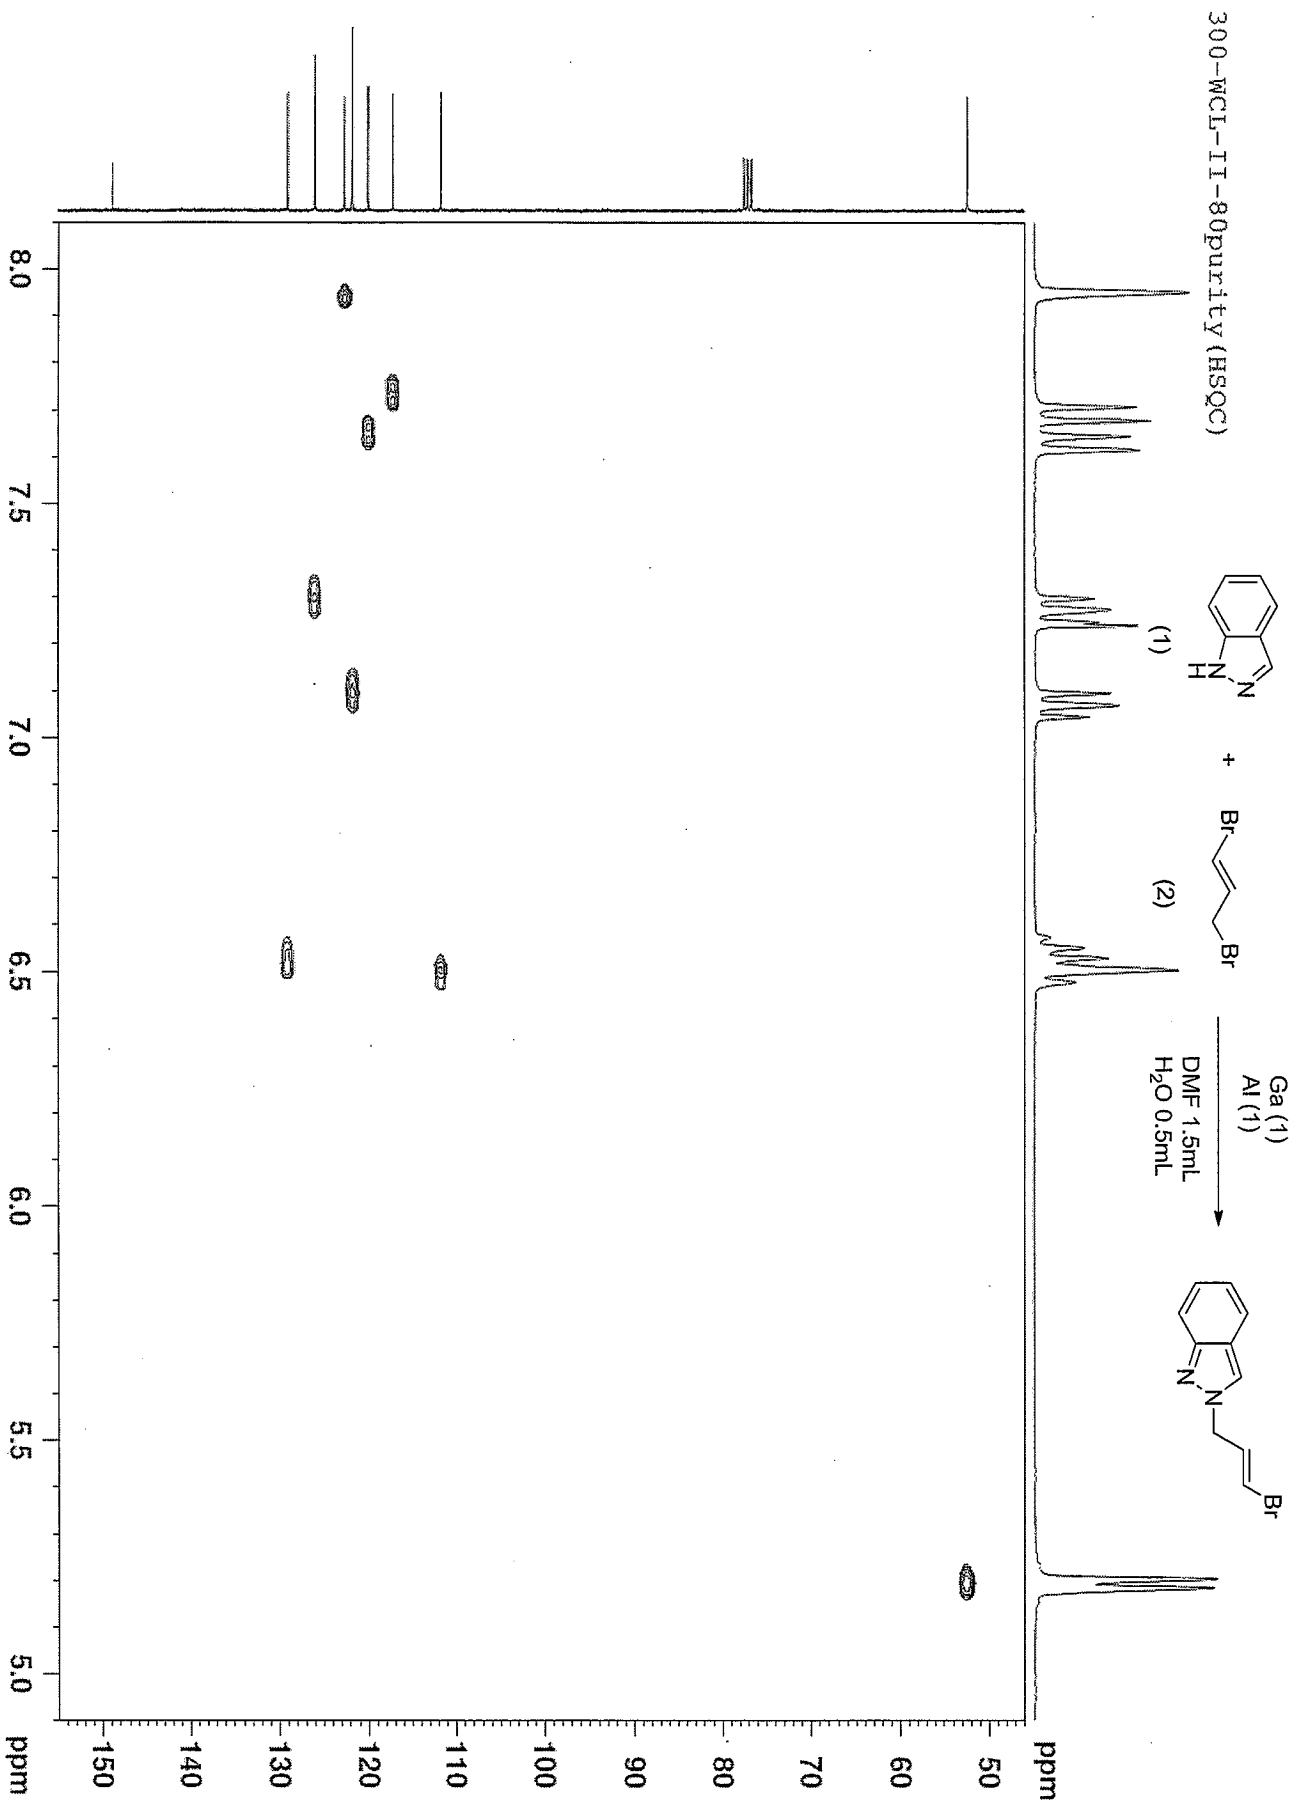



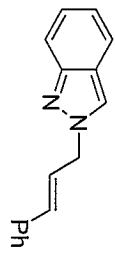

2f, CDCl3, 300 MHz

300-LHJ-111-2pvt1v2

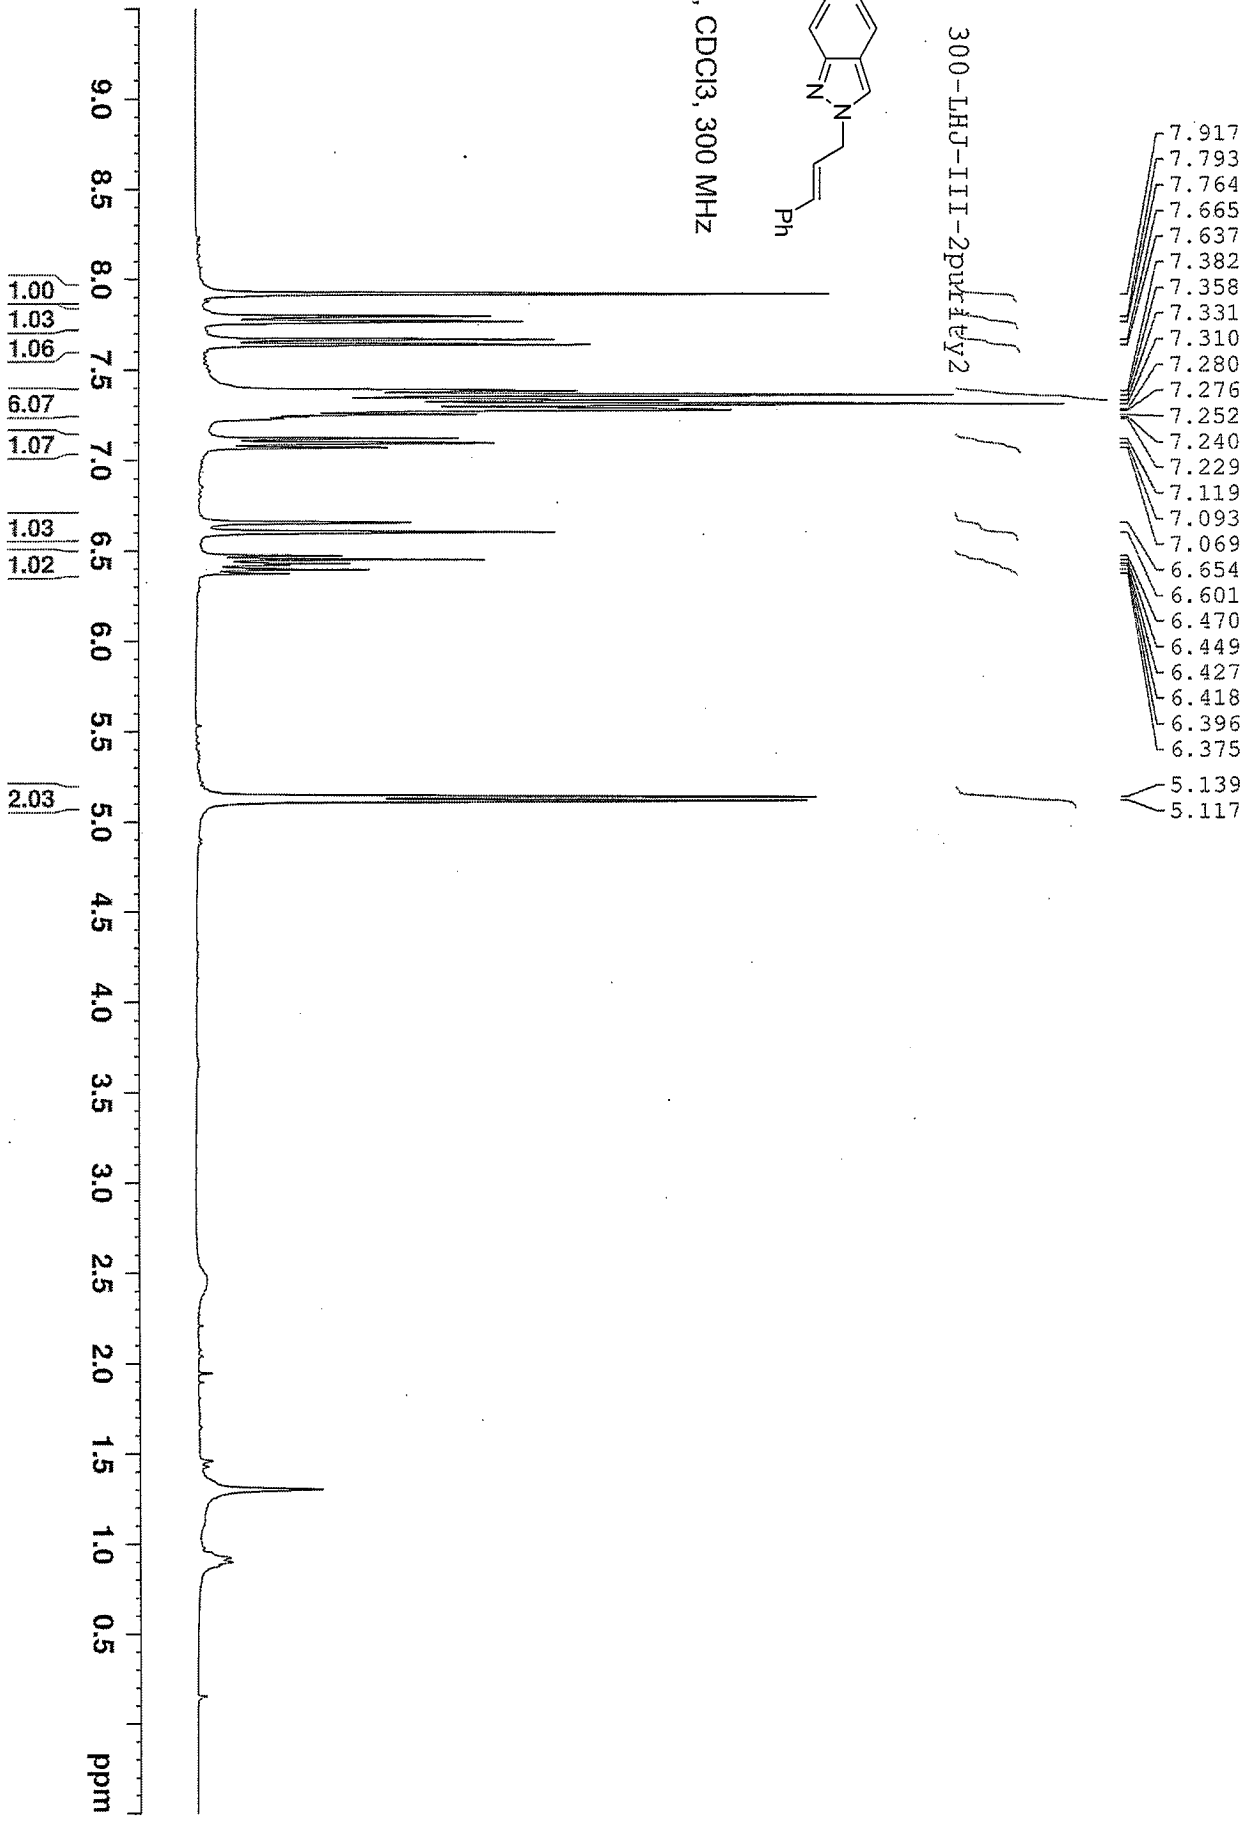

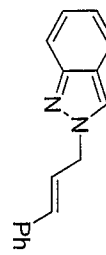

2f, CDCl<sub>3</sub>, 75 MHz

300-LHJ-III-2purity

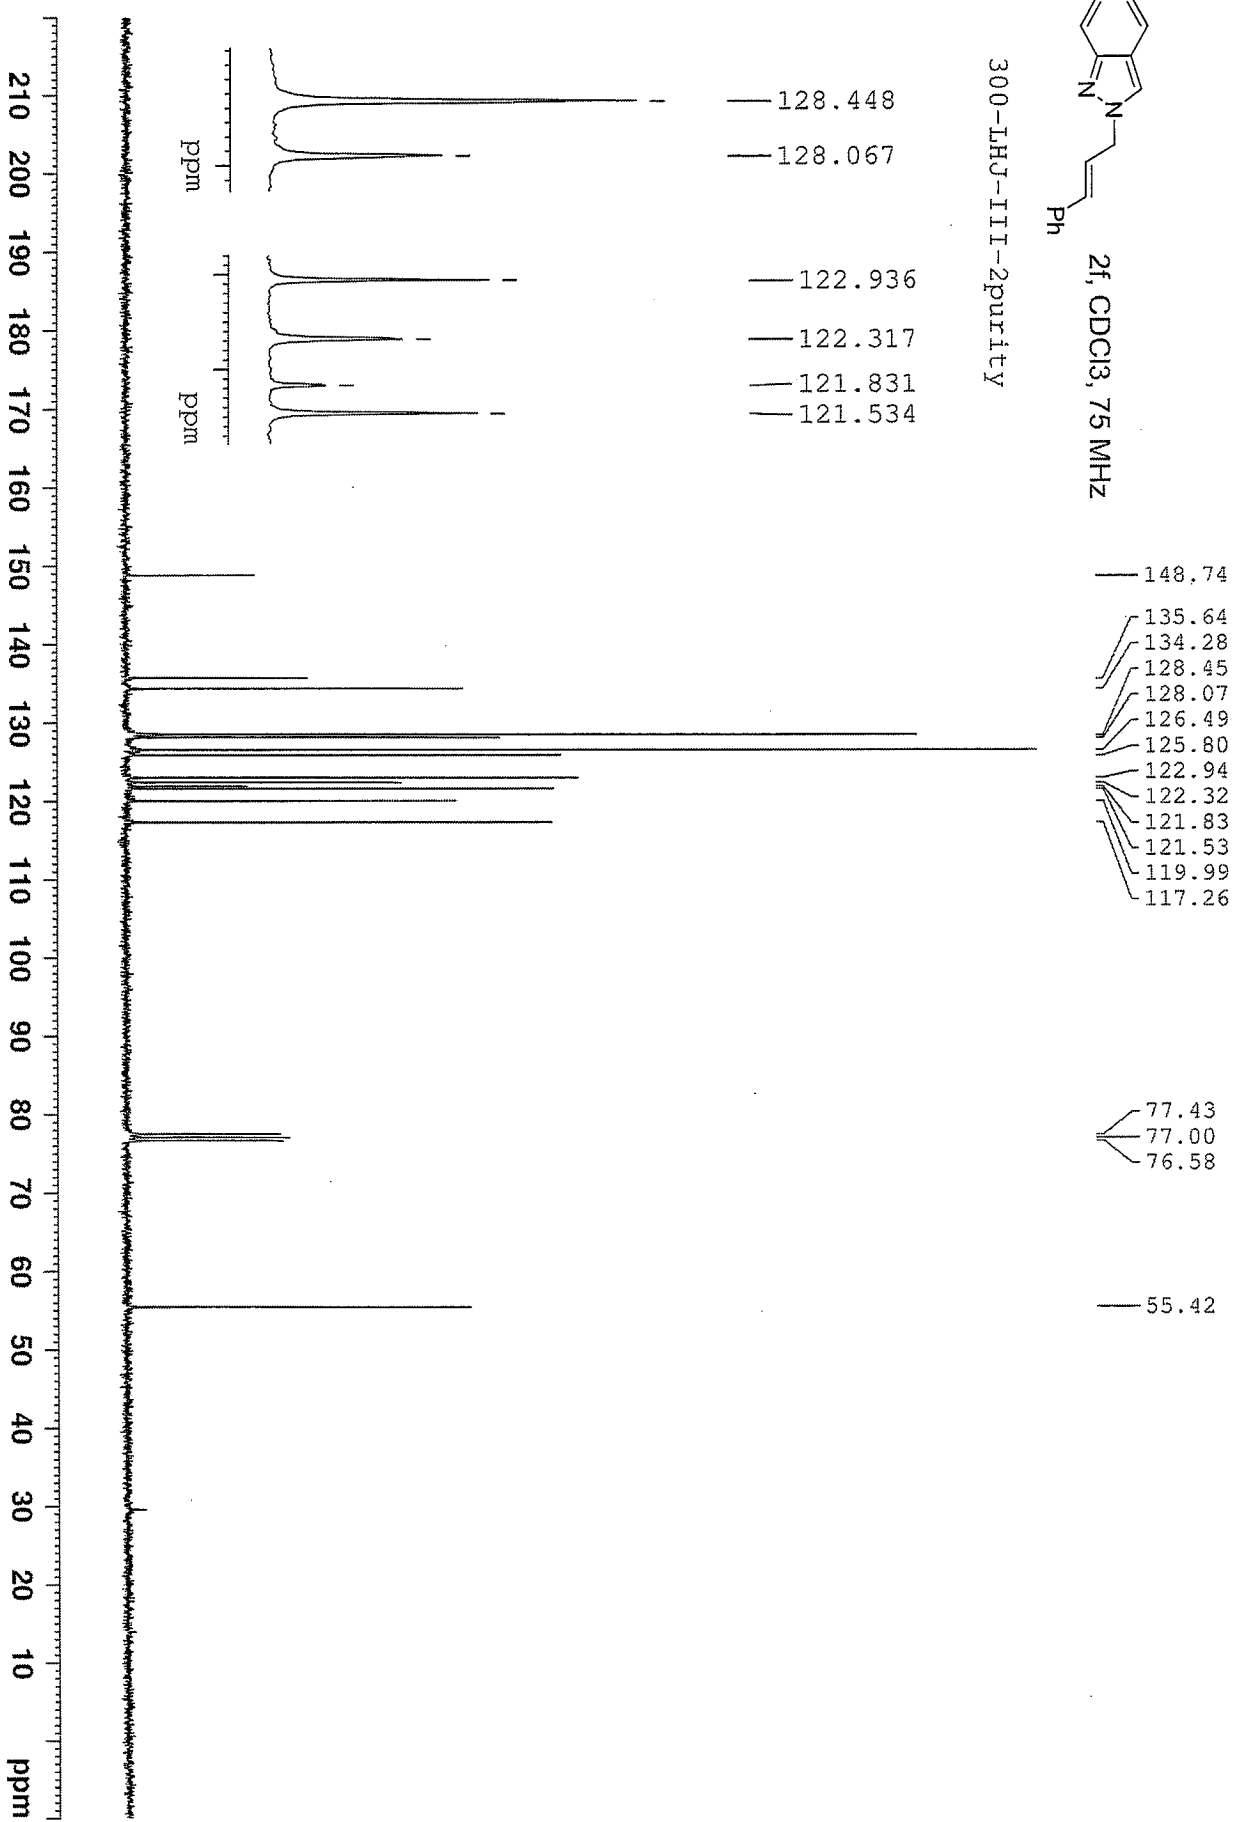

300-LHJ-III-2purity (HSQC)

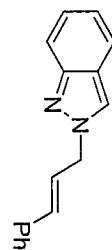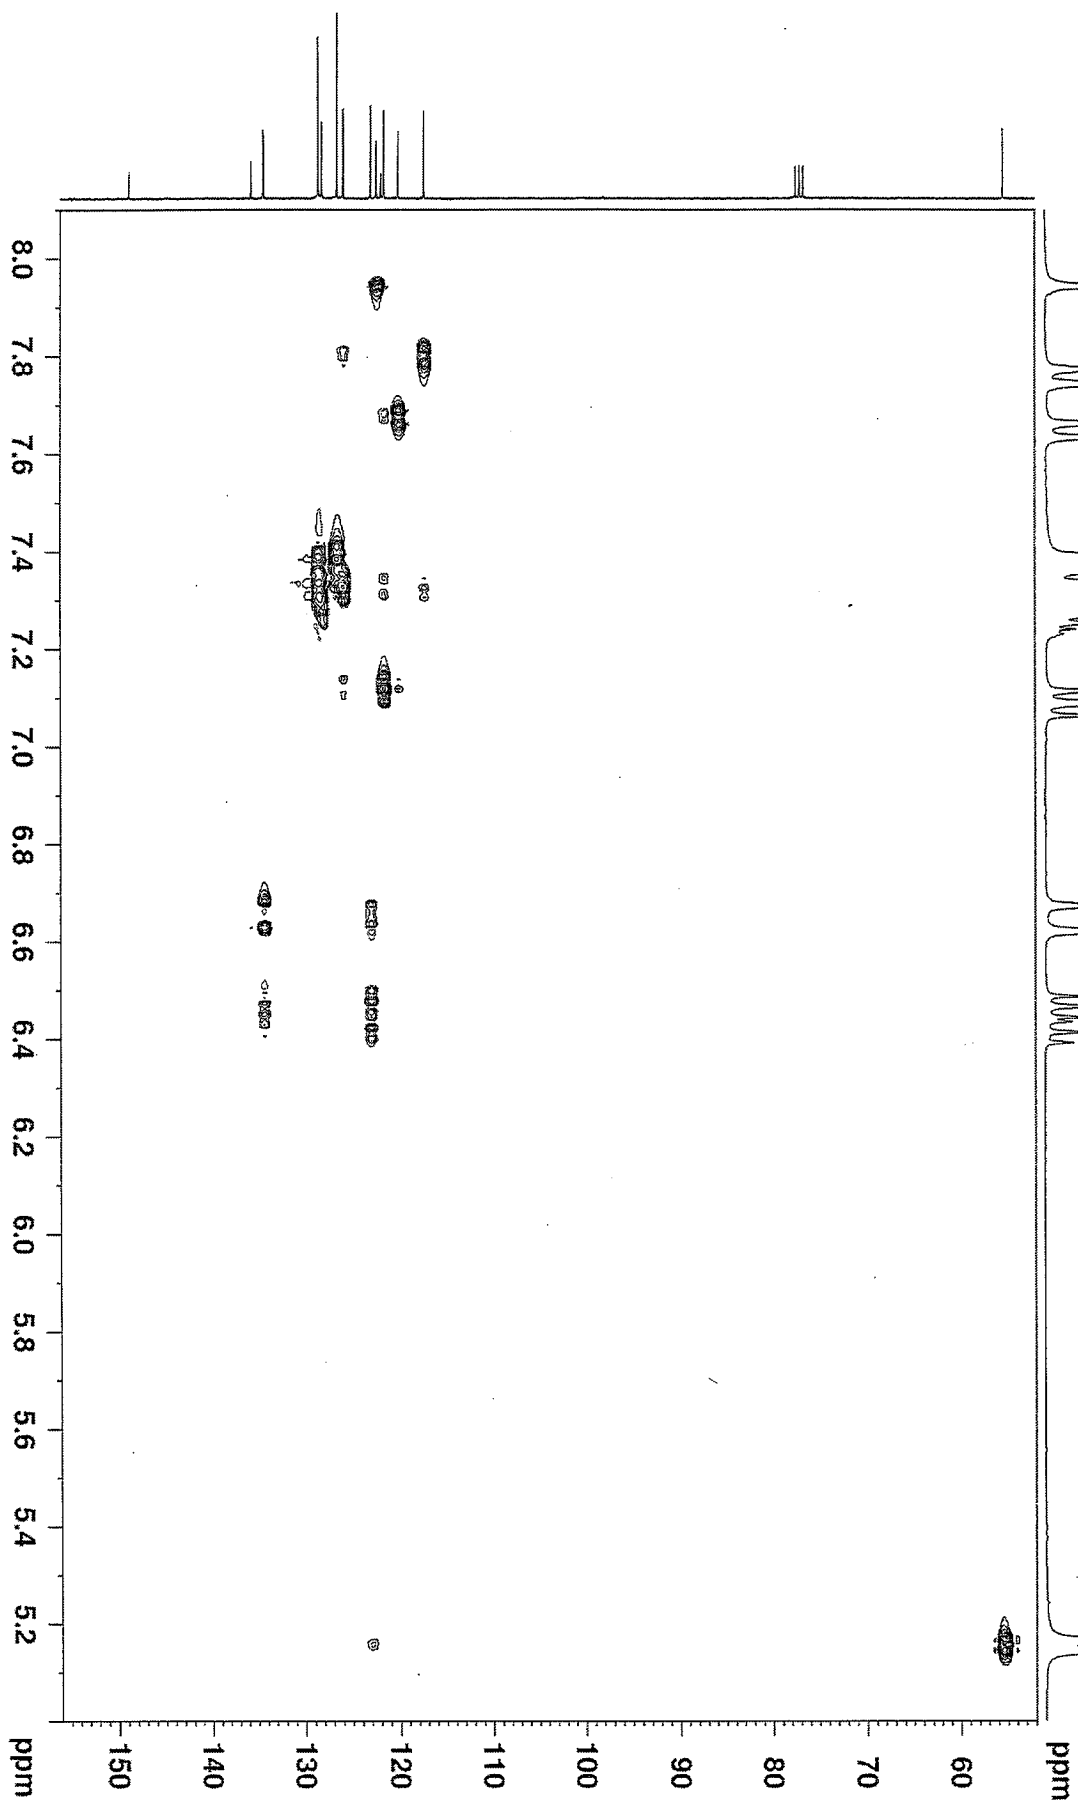

300-LHJ-III-2purity2 (HMBC)

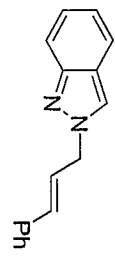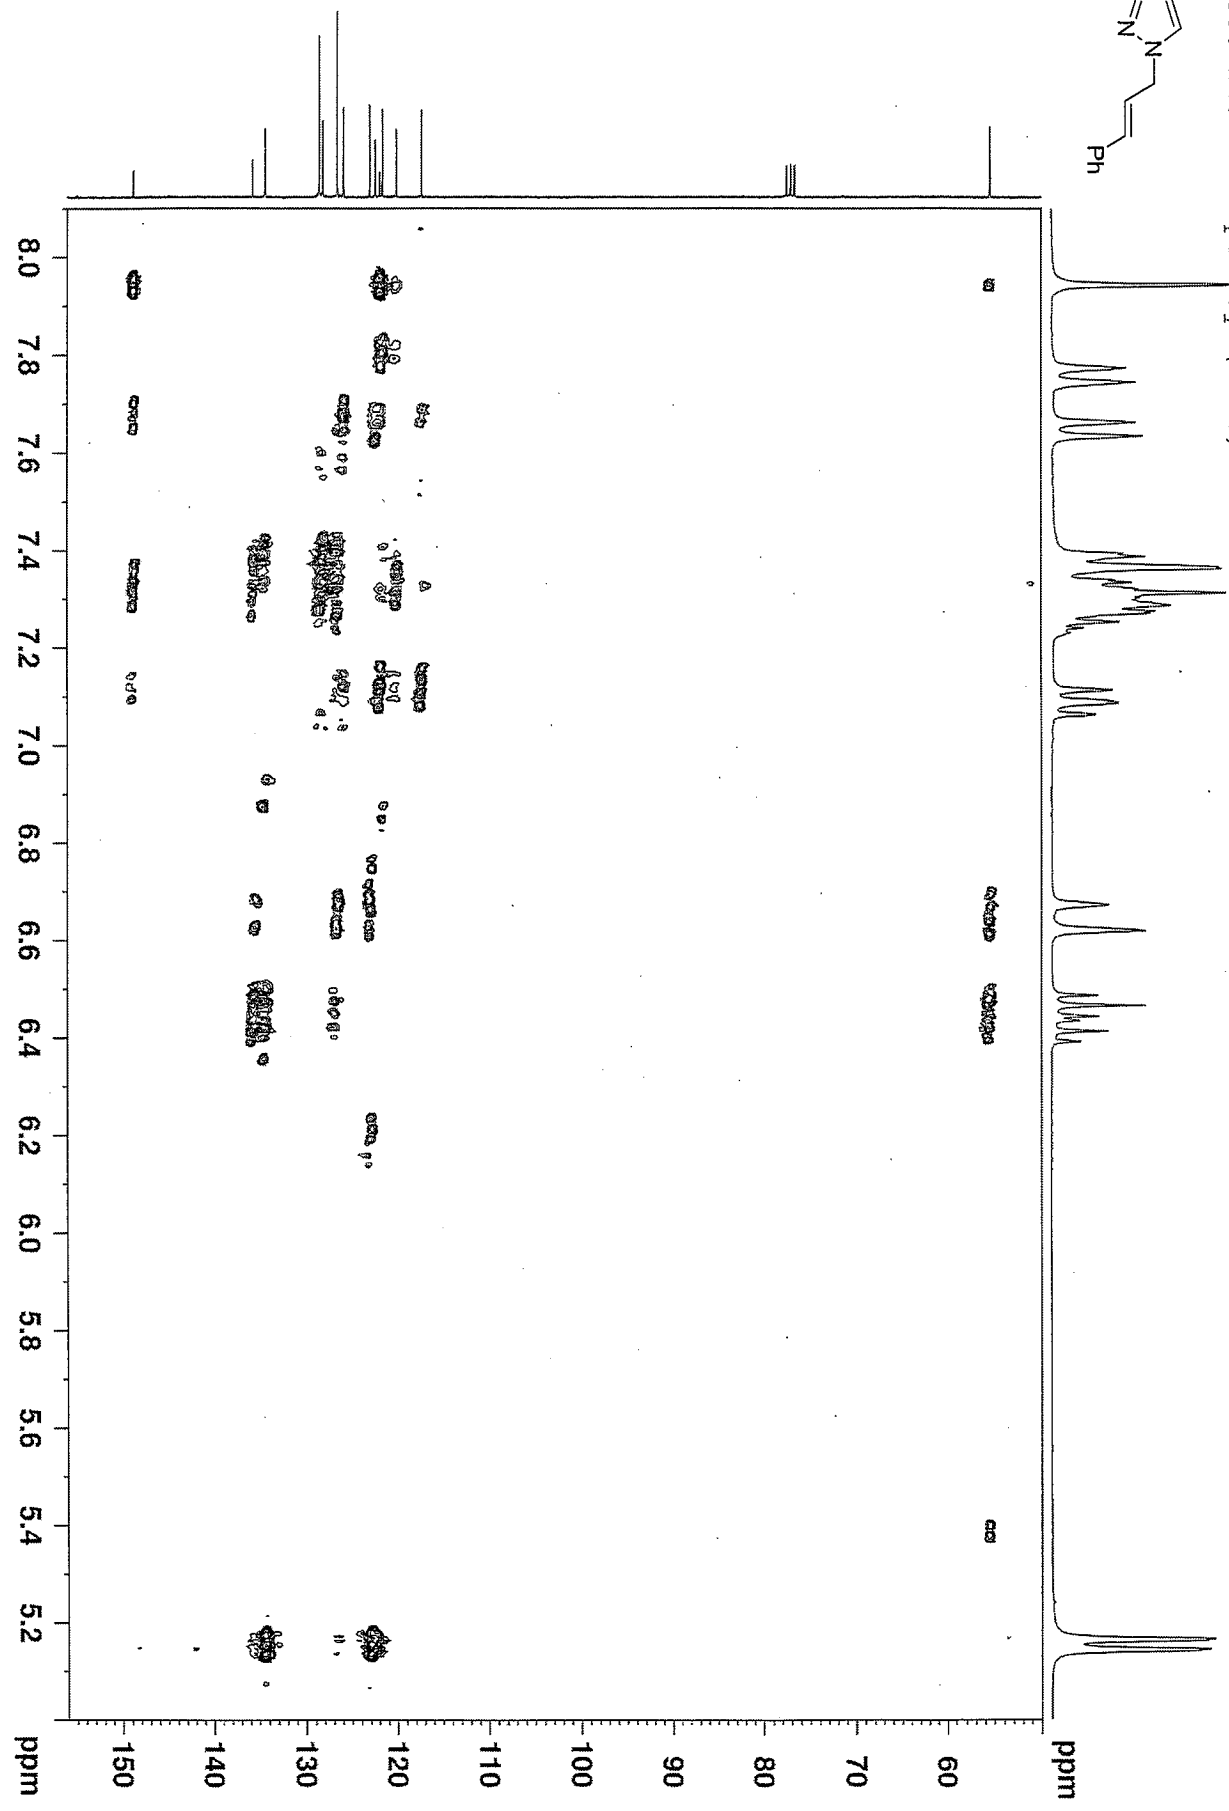

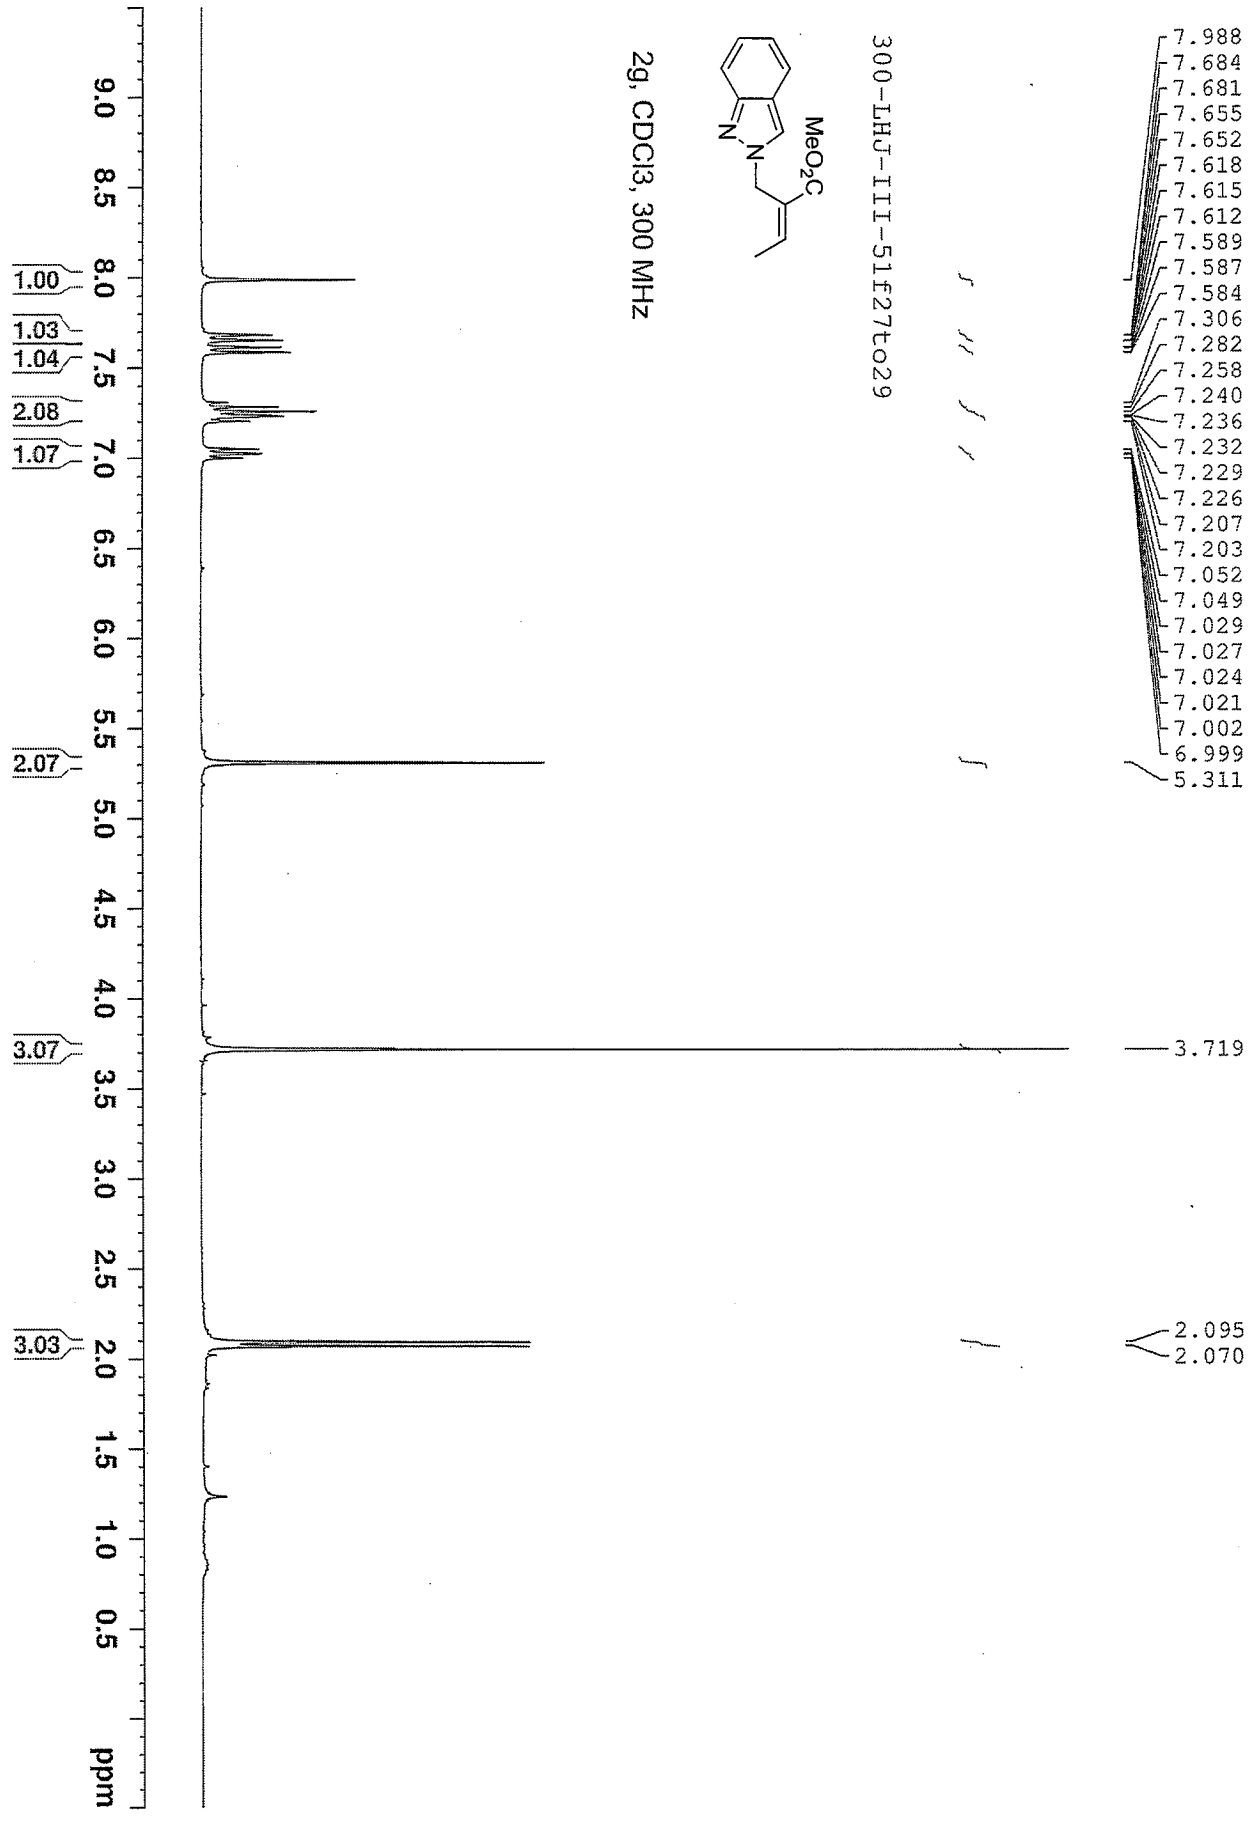

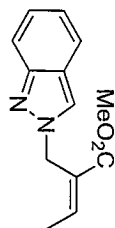

2g, CDCl<sub>3</sub>, 75 MHz

300-LHJ-III-51F27to29

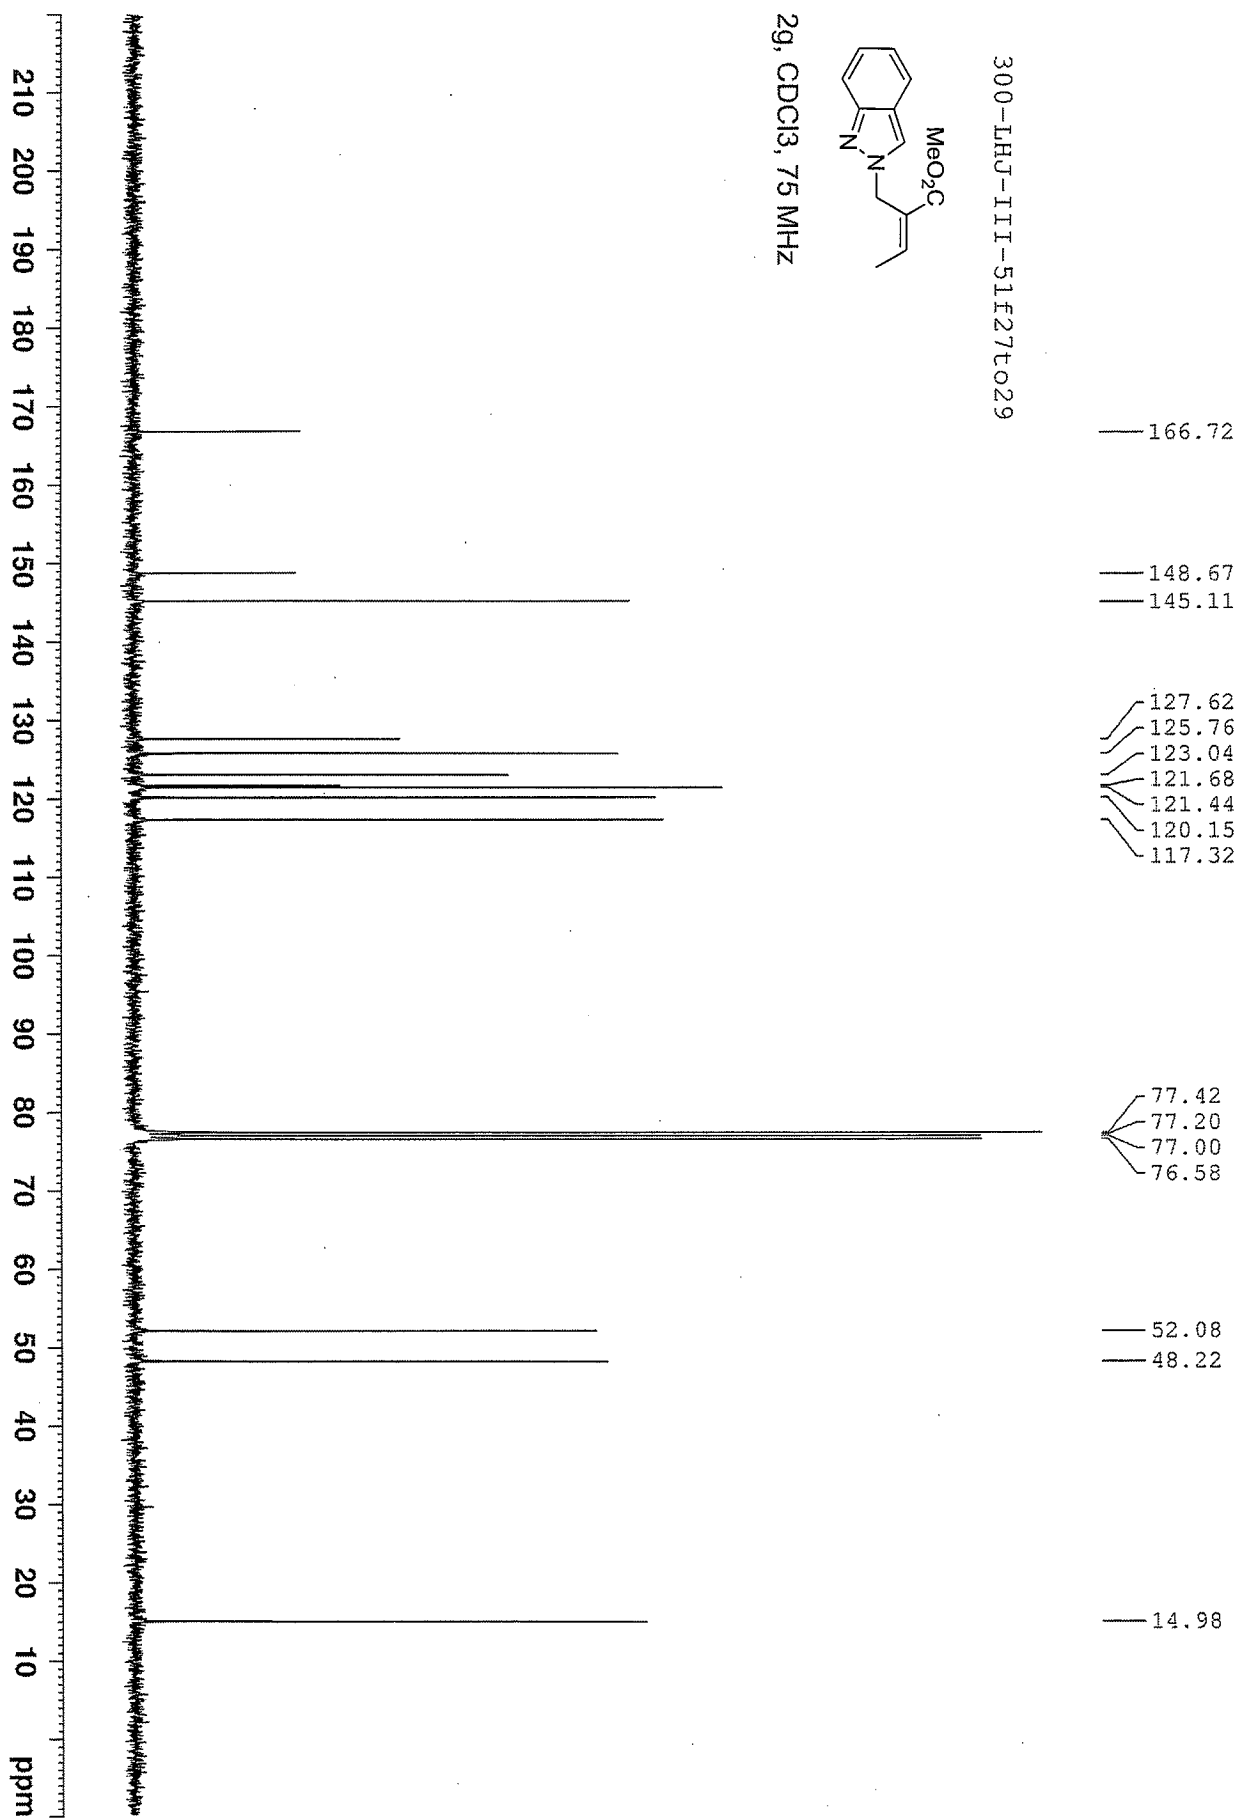

300-LHJ-III-51F27to29 (HSQC)

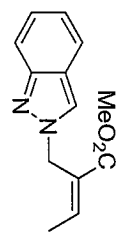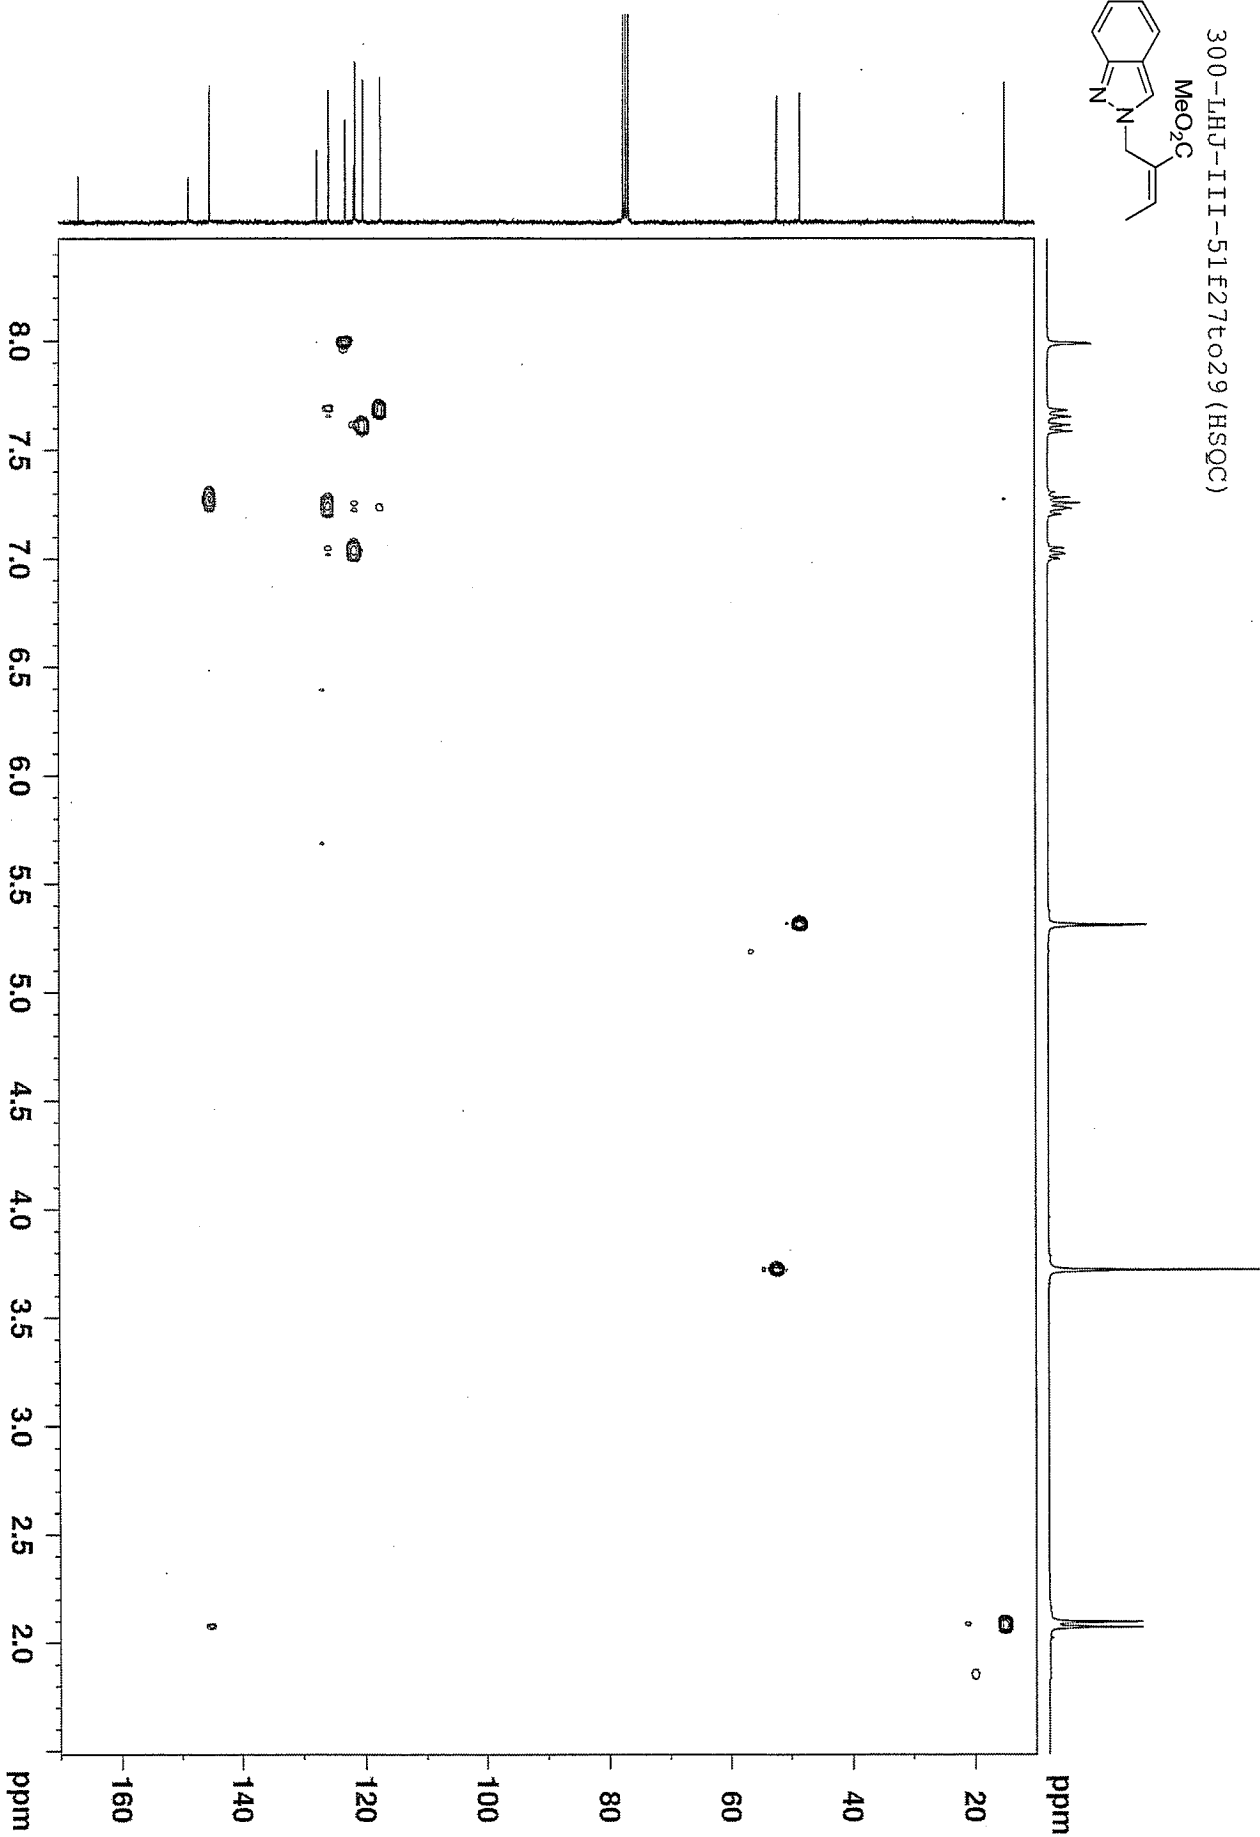

300-LHJ-III-51f27c029 (HMBC)

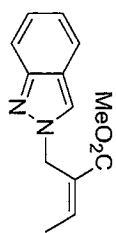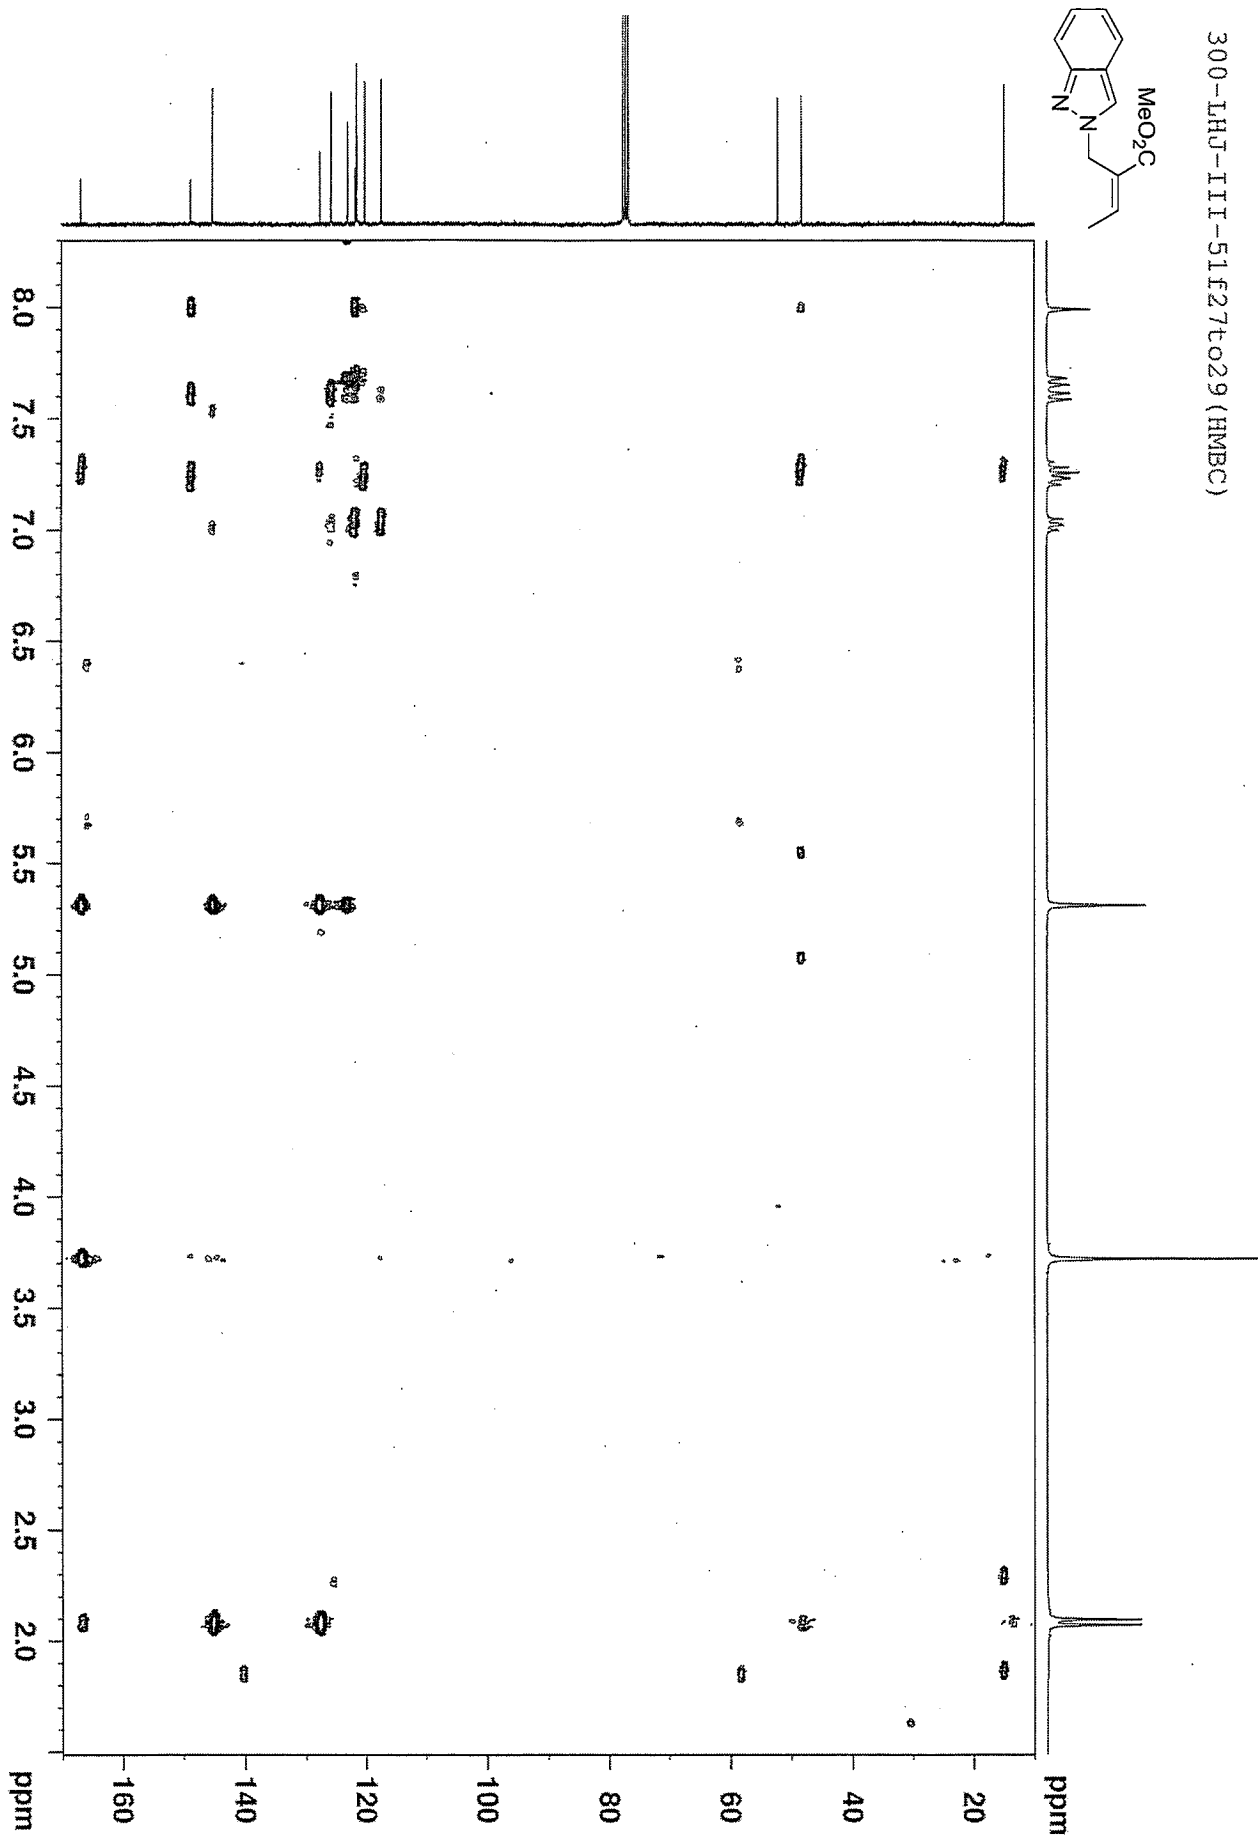



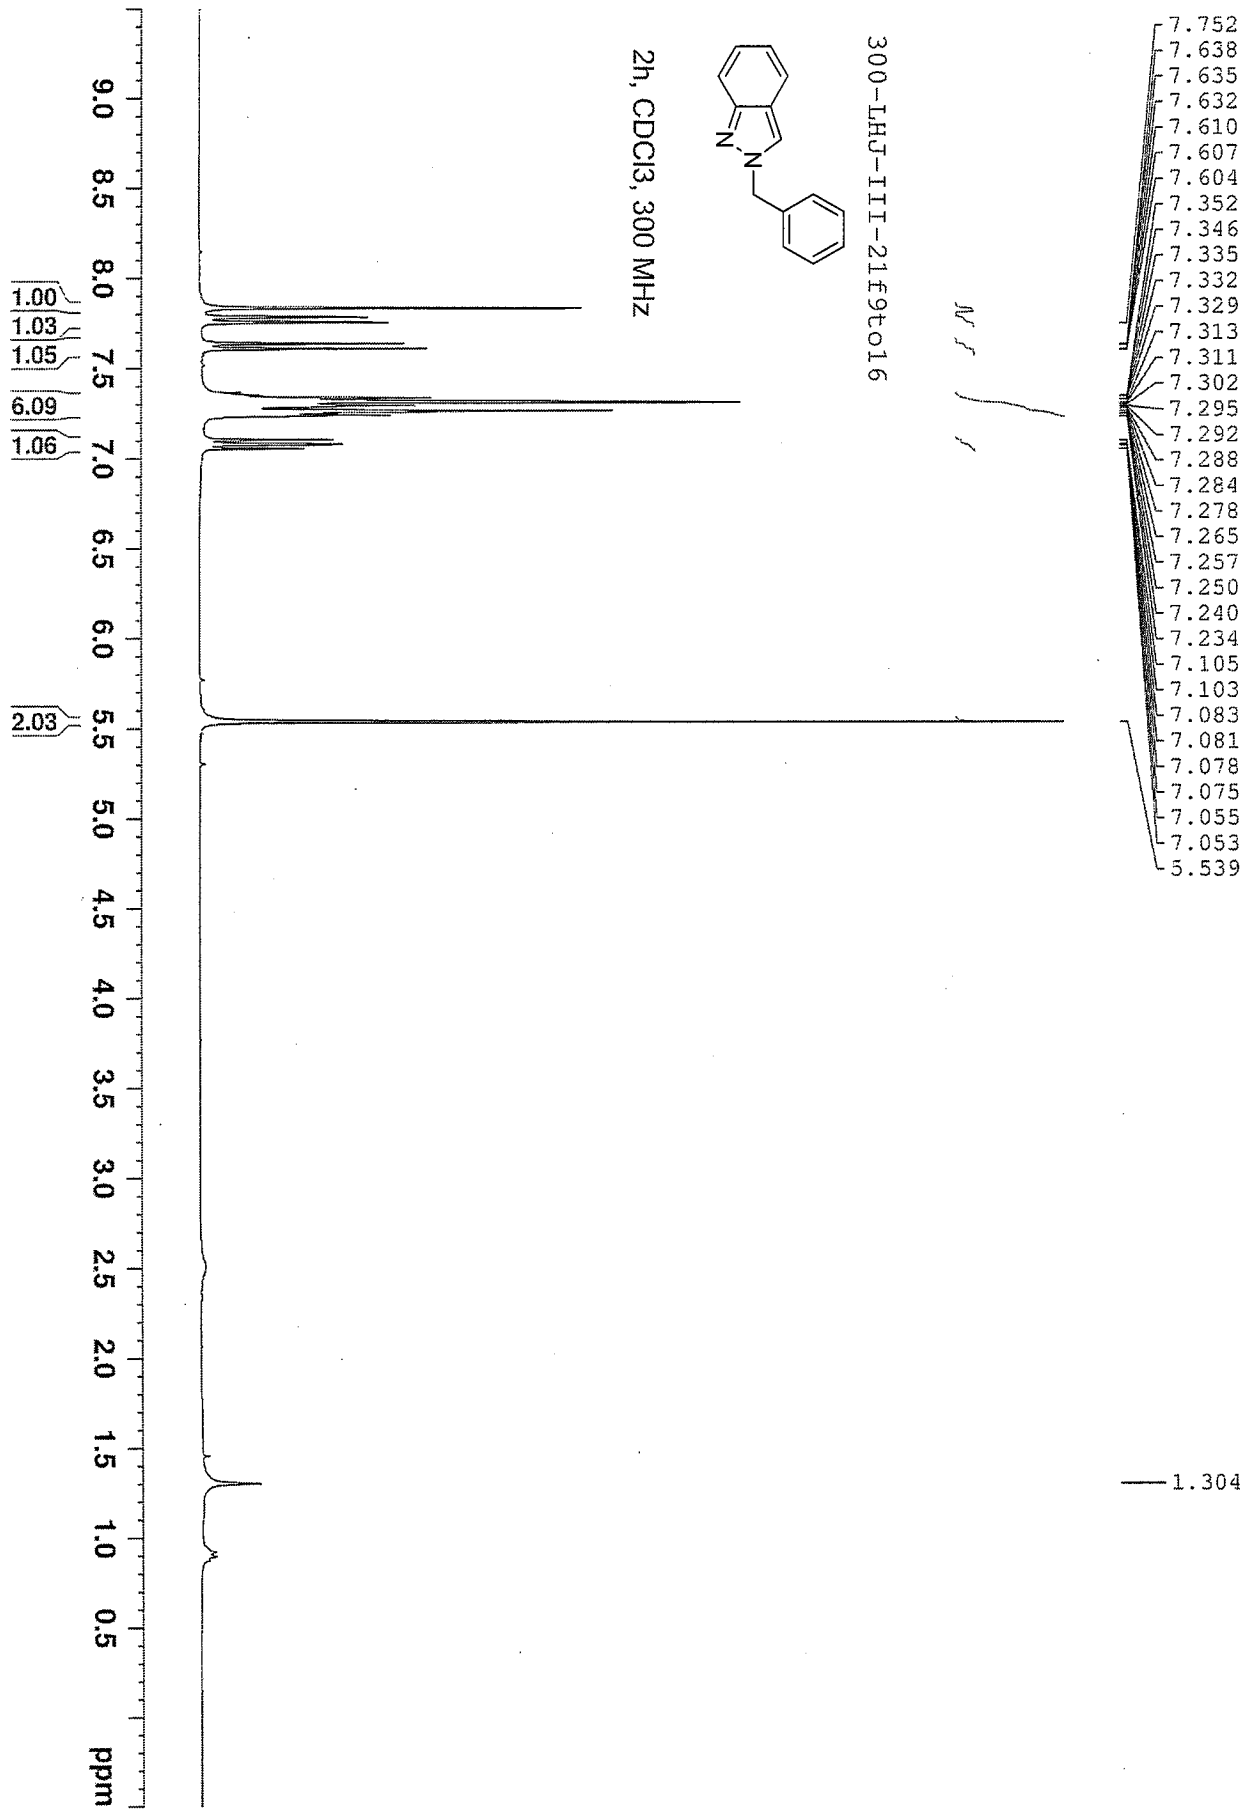

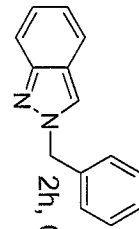

300-LHJ-III-21F9t016

2h, CDCl<sub>3</sub>, 75 MHz

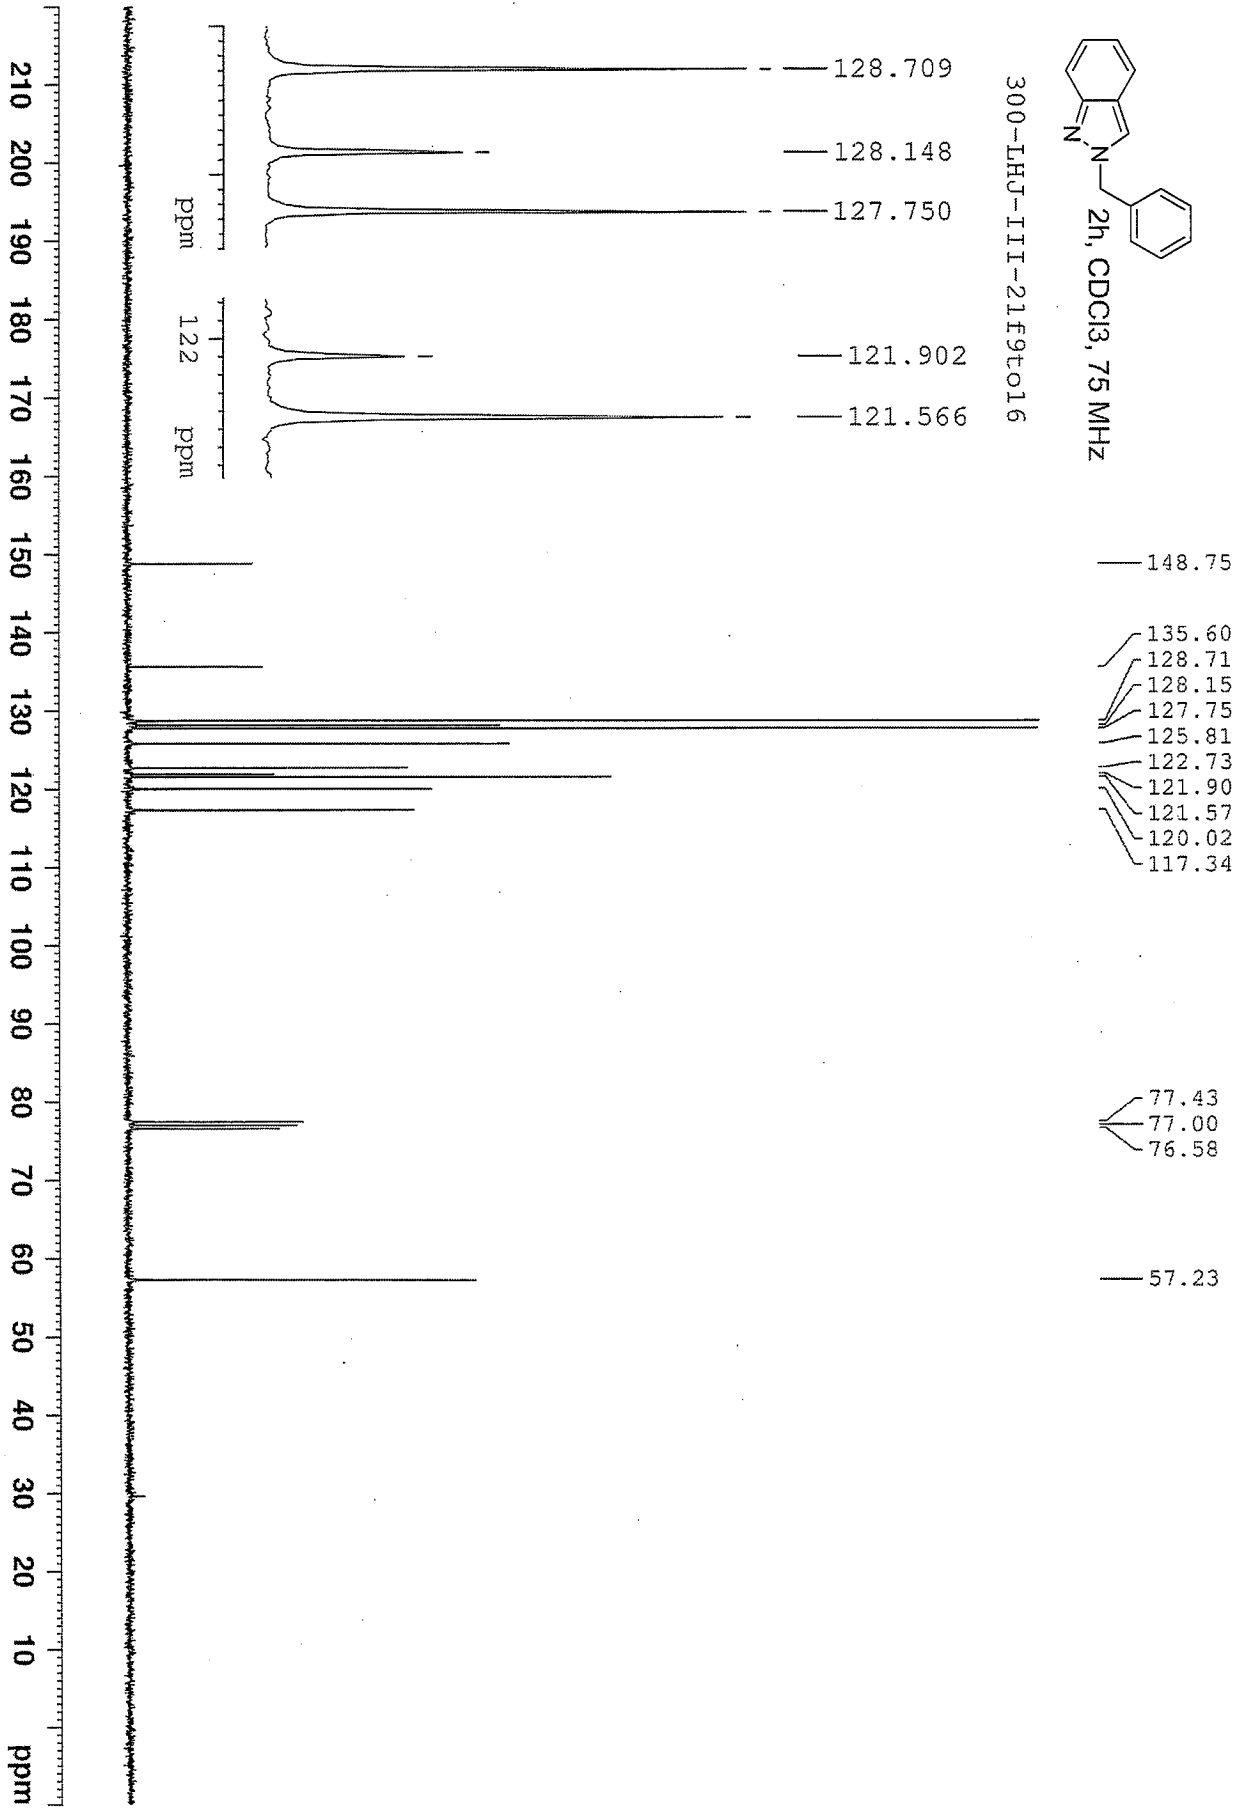

300-LHJ-III-21F9t016 (HSQC)

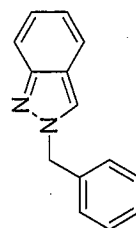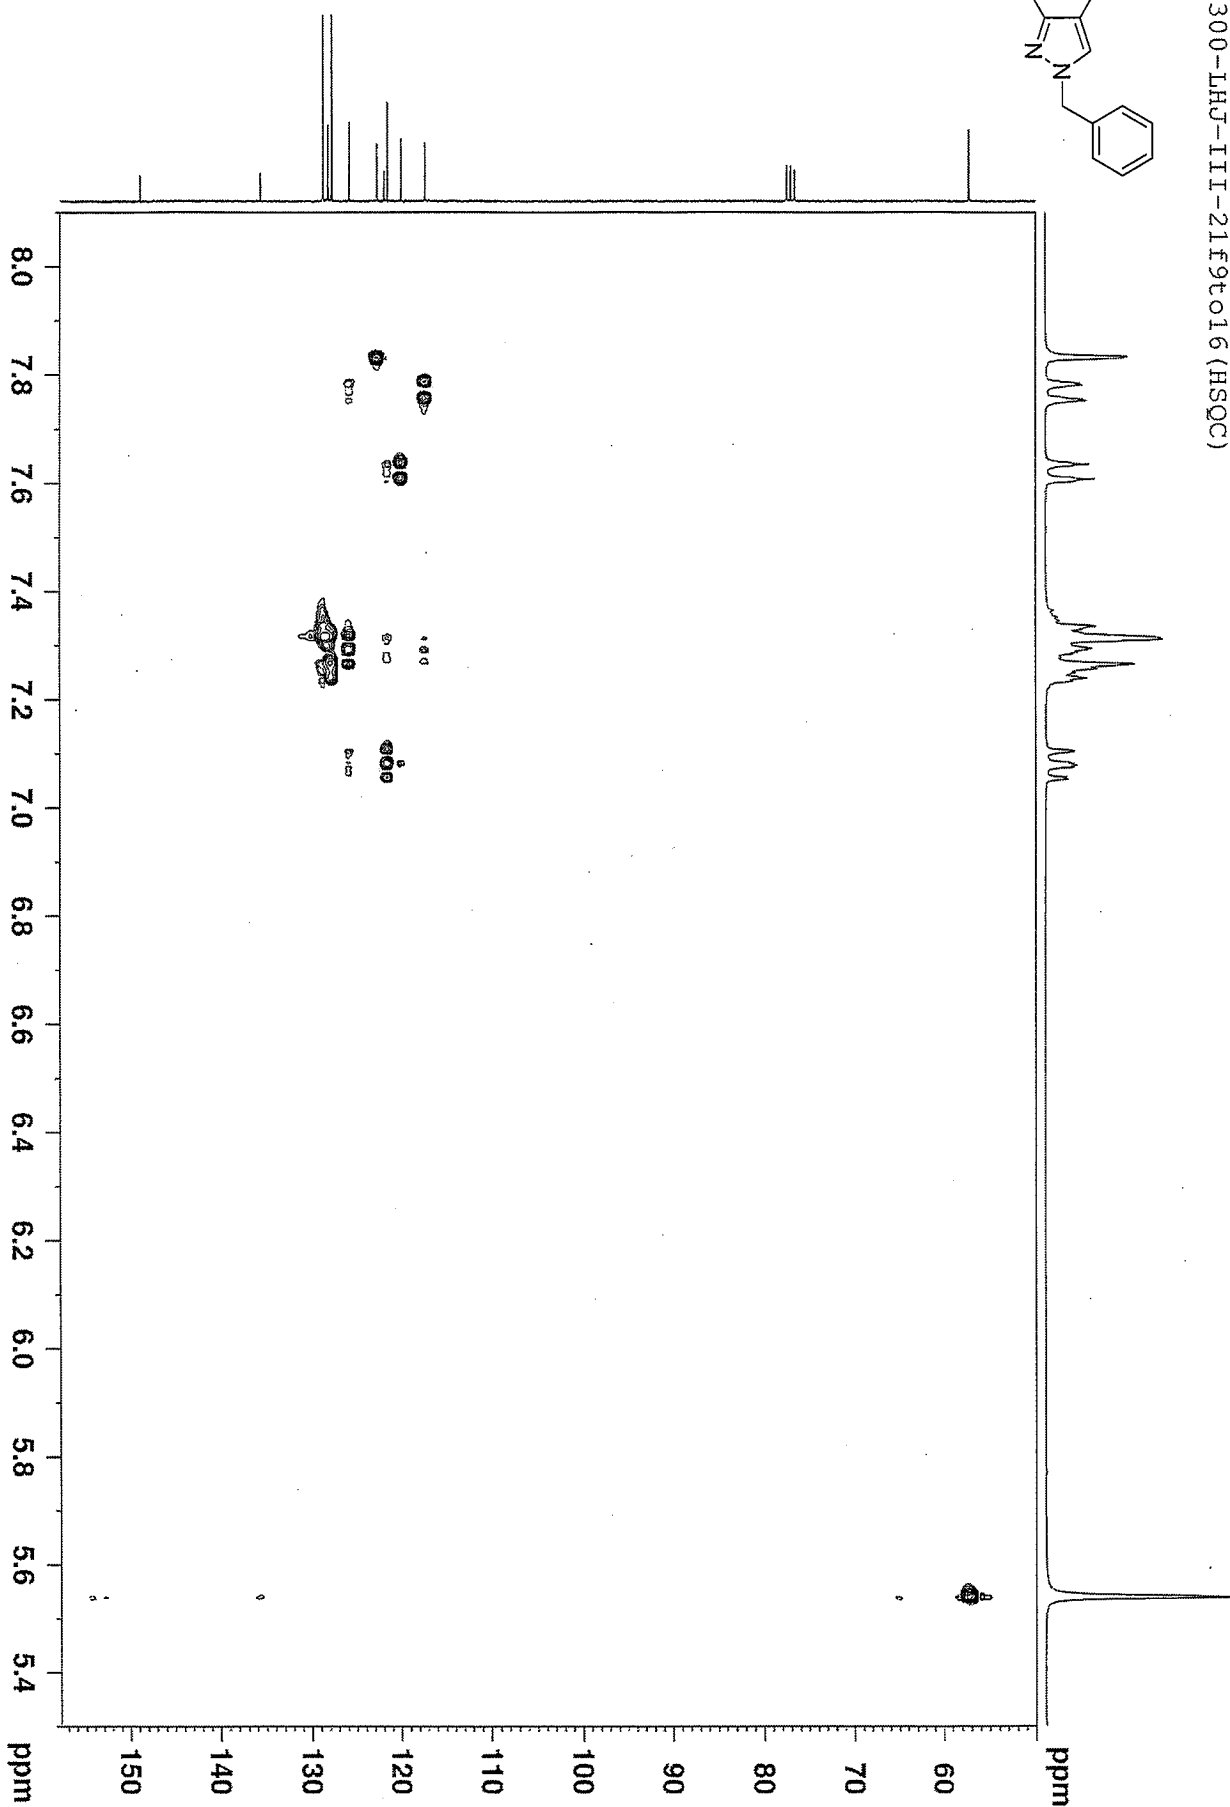

300-LHJ-III-21F9t016 (HMBC)

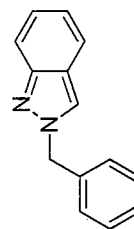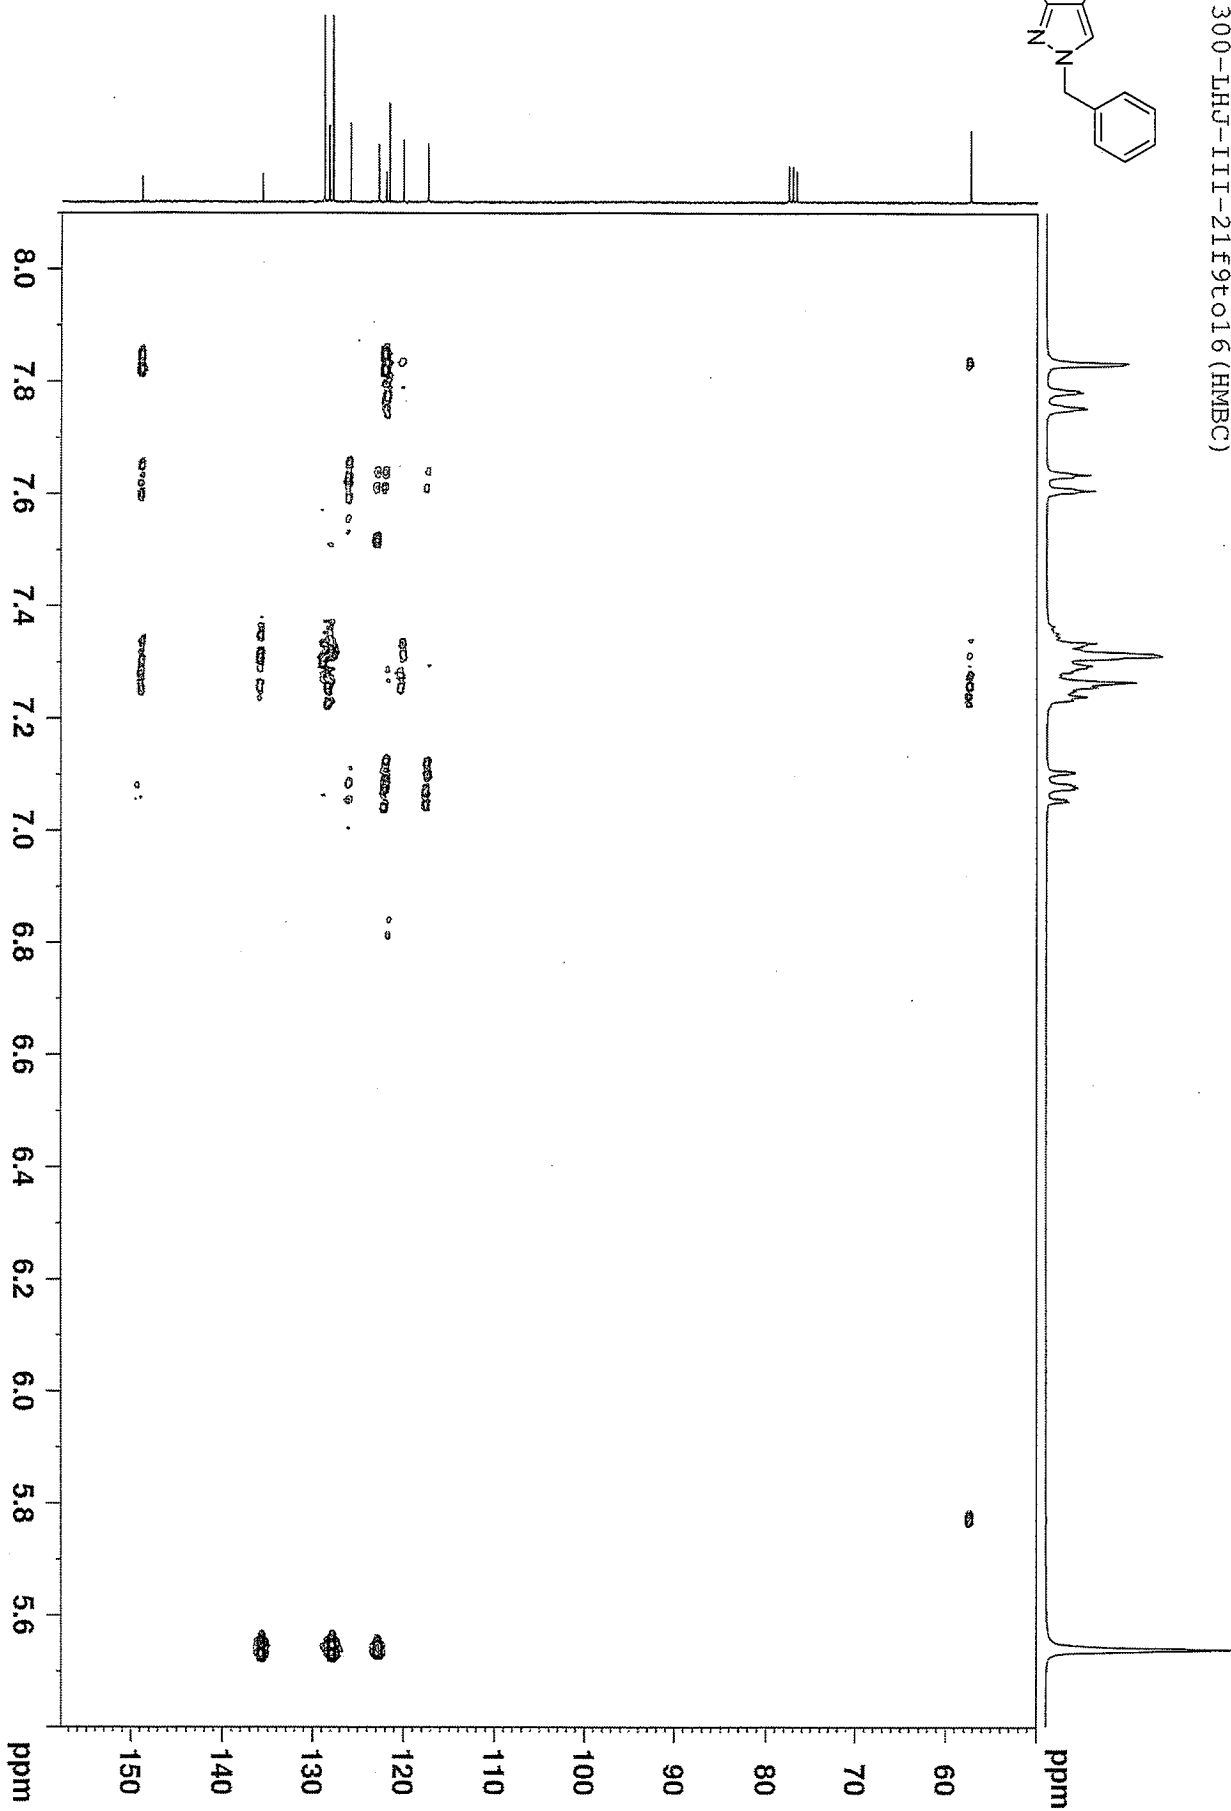

7.581  
7.526  
7.522  
7.500  
7.496  
7.283  
7.280  
7.261  
7.257  
7.255  
7.250  
7.232  
7.228  
7.150  
7.146  
7.126  
7.121  
7.101  
7.096  
7.088  
7.081  
7.074  
7.072  
7.062  
7.054  
7.050  
7.047  
7.044  
7.037  
7.031  
7.024  
7.022  
6.904  
6.898  
6.880  
6.874  
5.597

*Handwritten notes: s s s s s*

300-LHJ-III-20F2t016

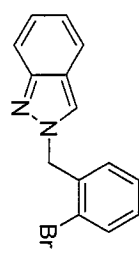

21, CDCl3, 300 MHz

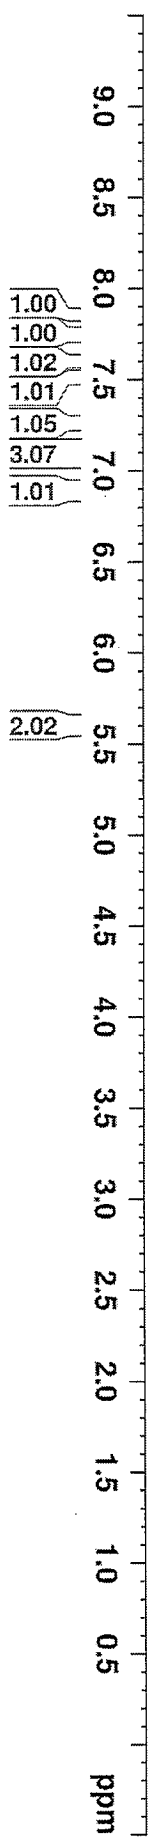

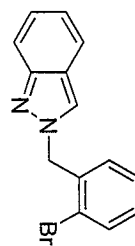

2i, CDCl<sub>3</sub>, 75 MHz

300-LHJ-III-20F2t016

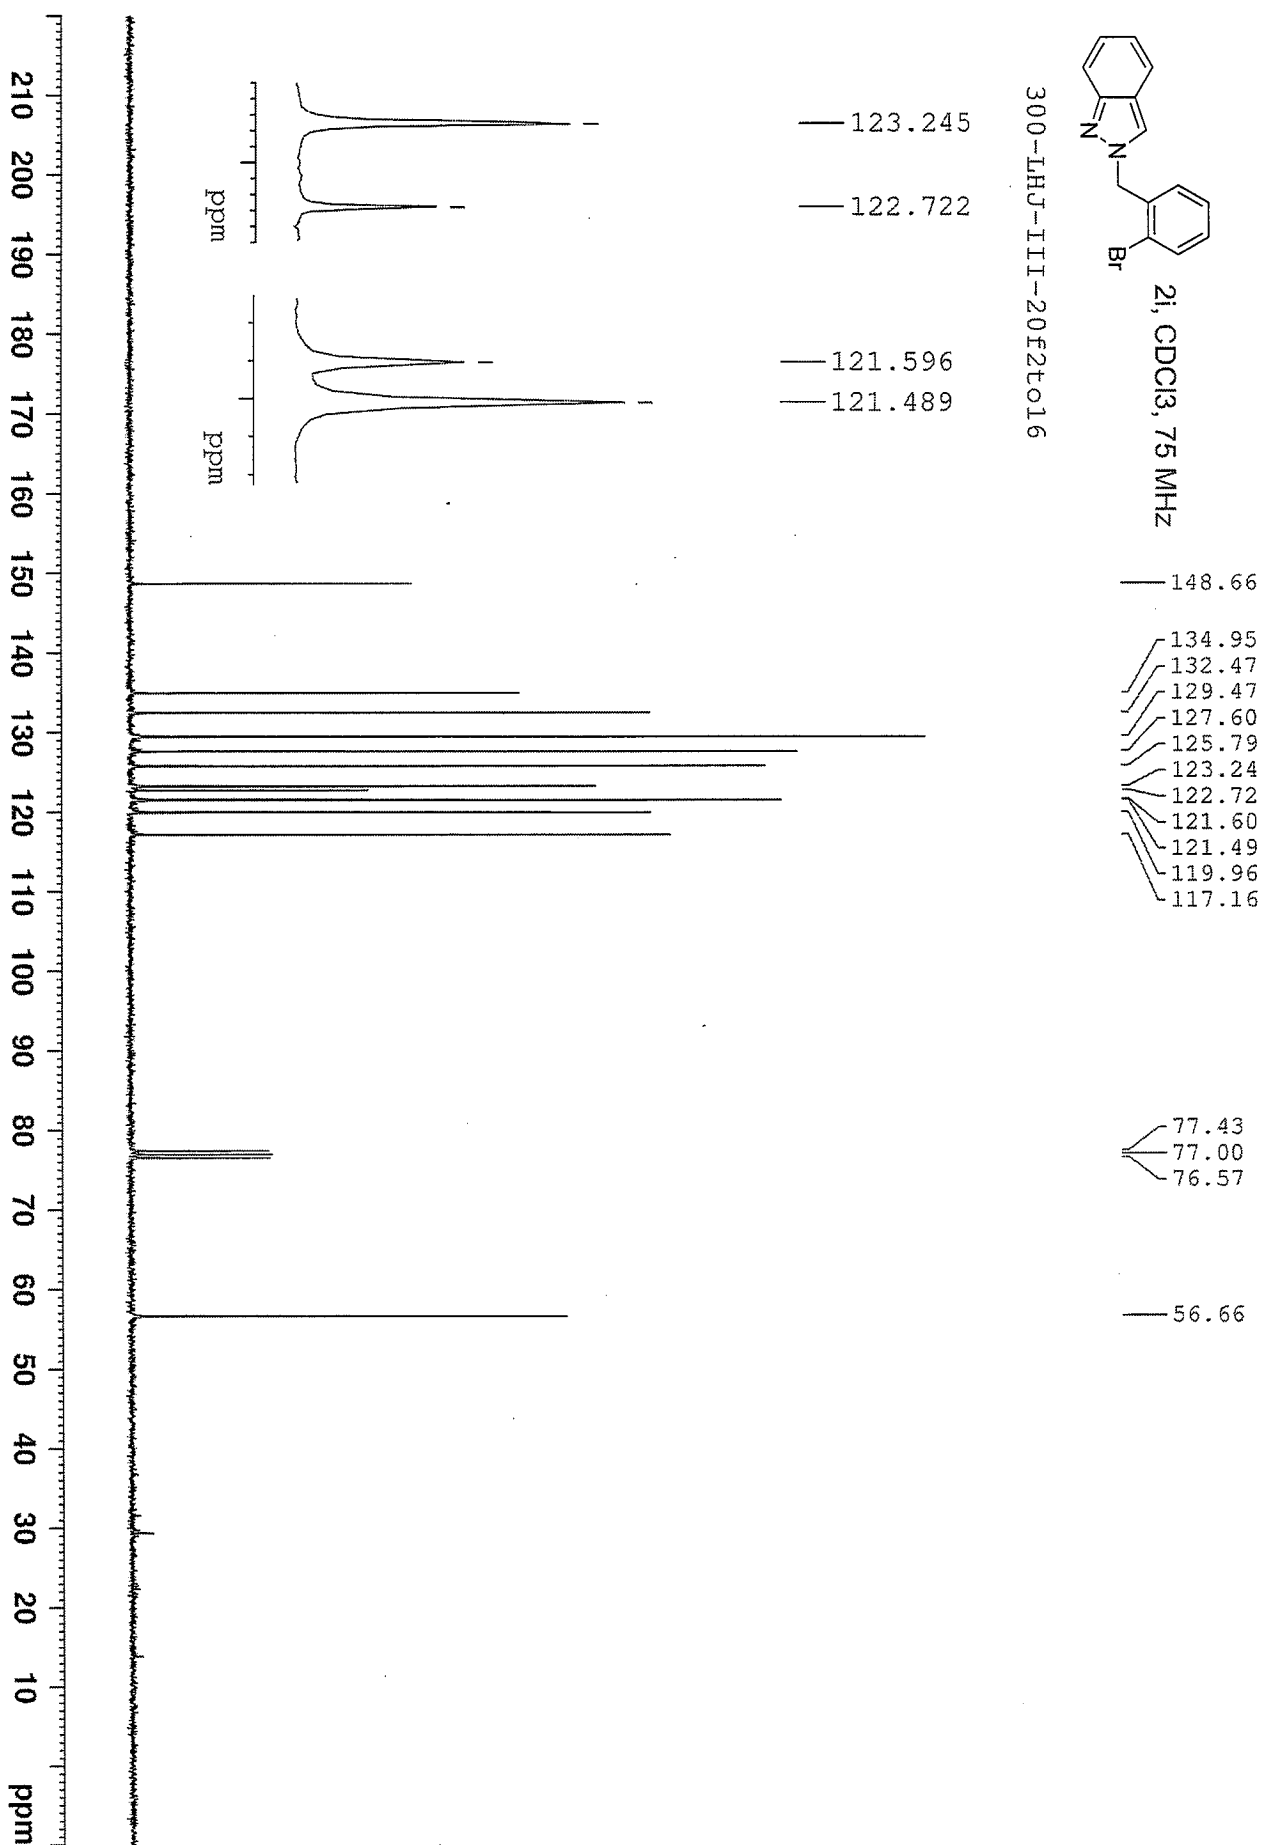

300-LHJ-III-20F2t016 (HSQC)

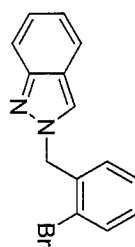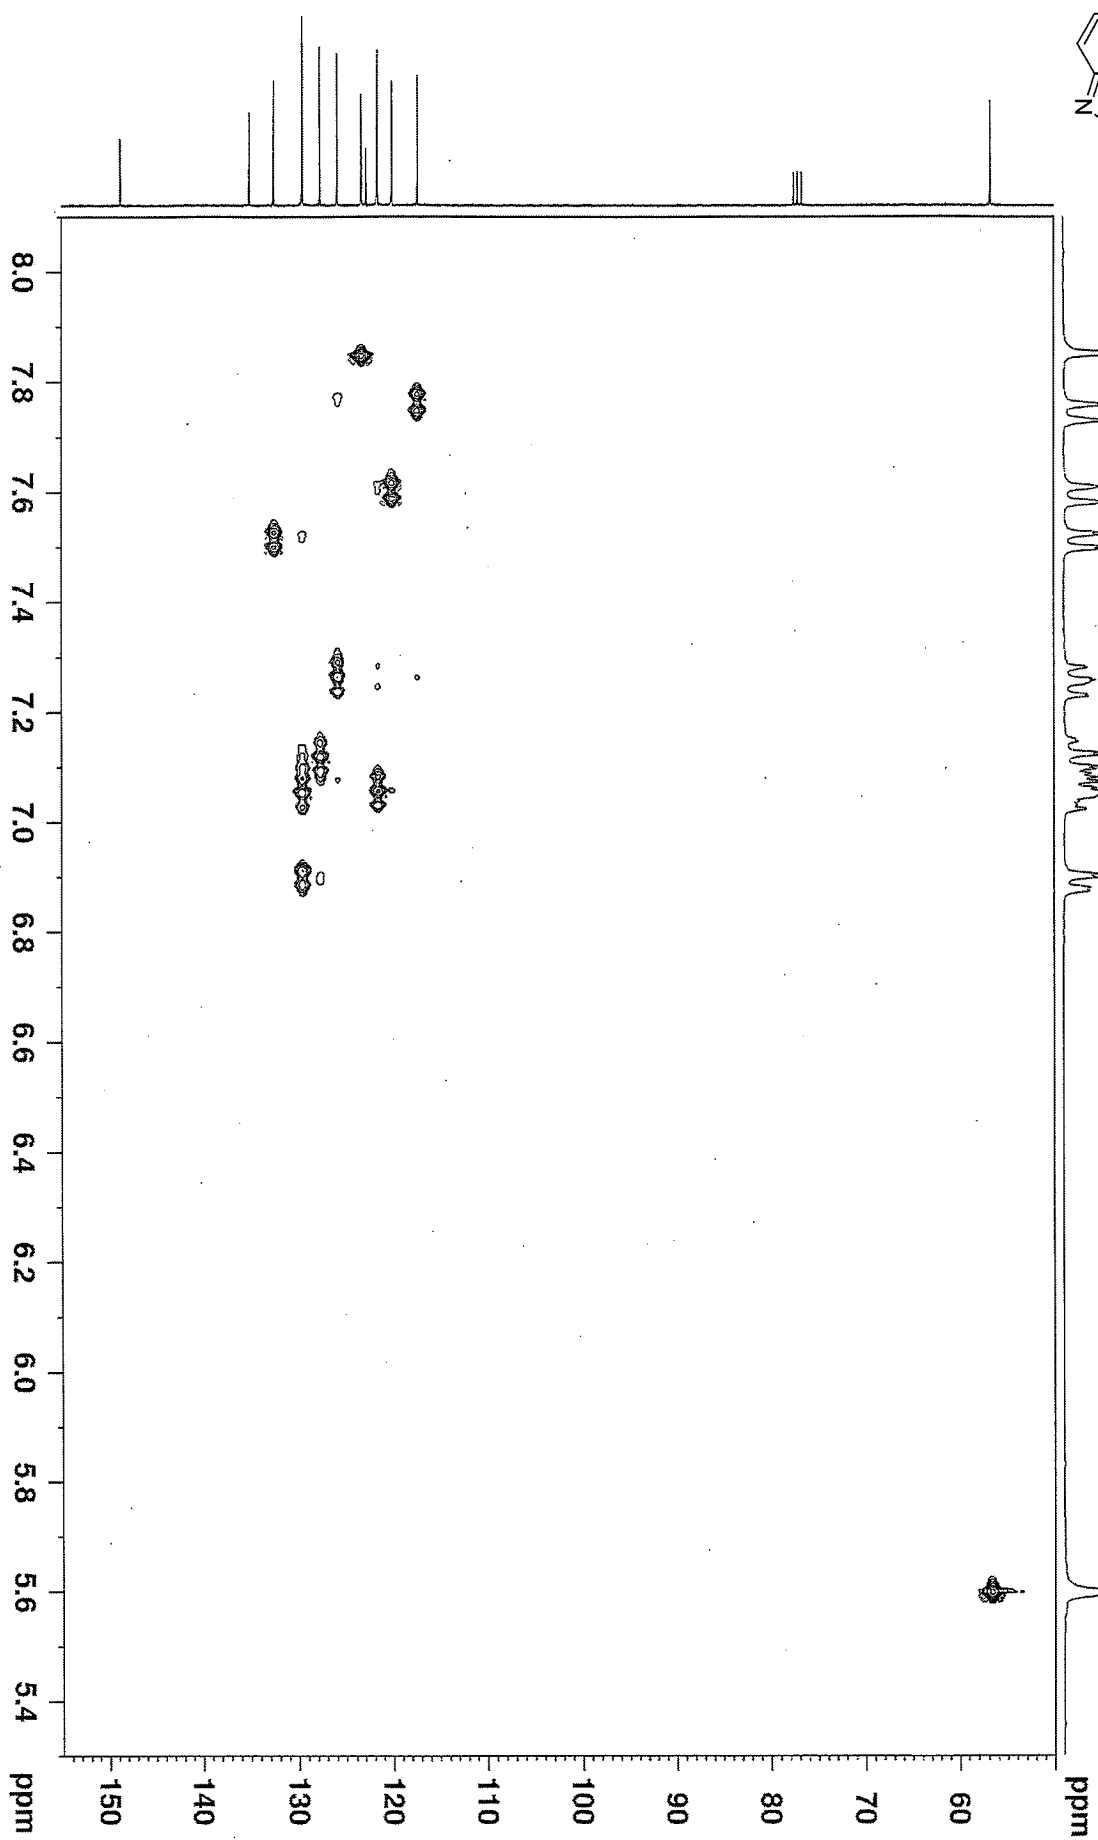

300-LHJ-III-20F2t016 (HMBC)

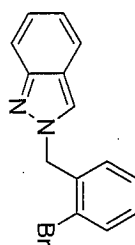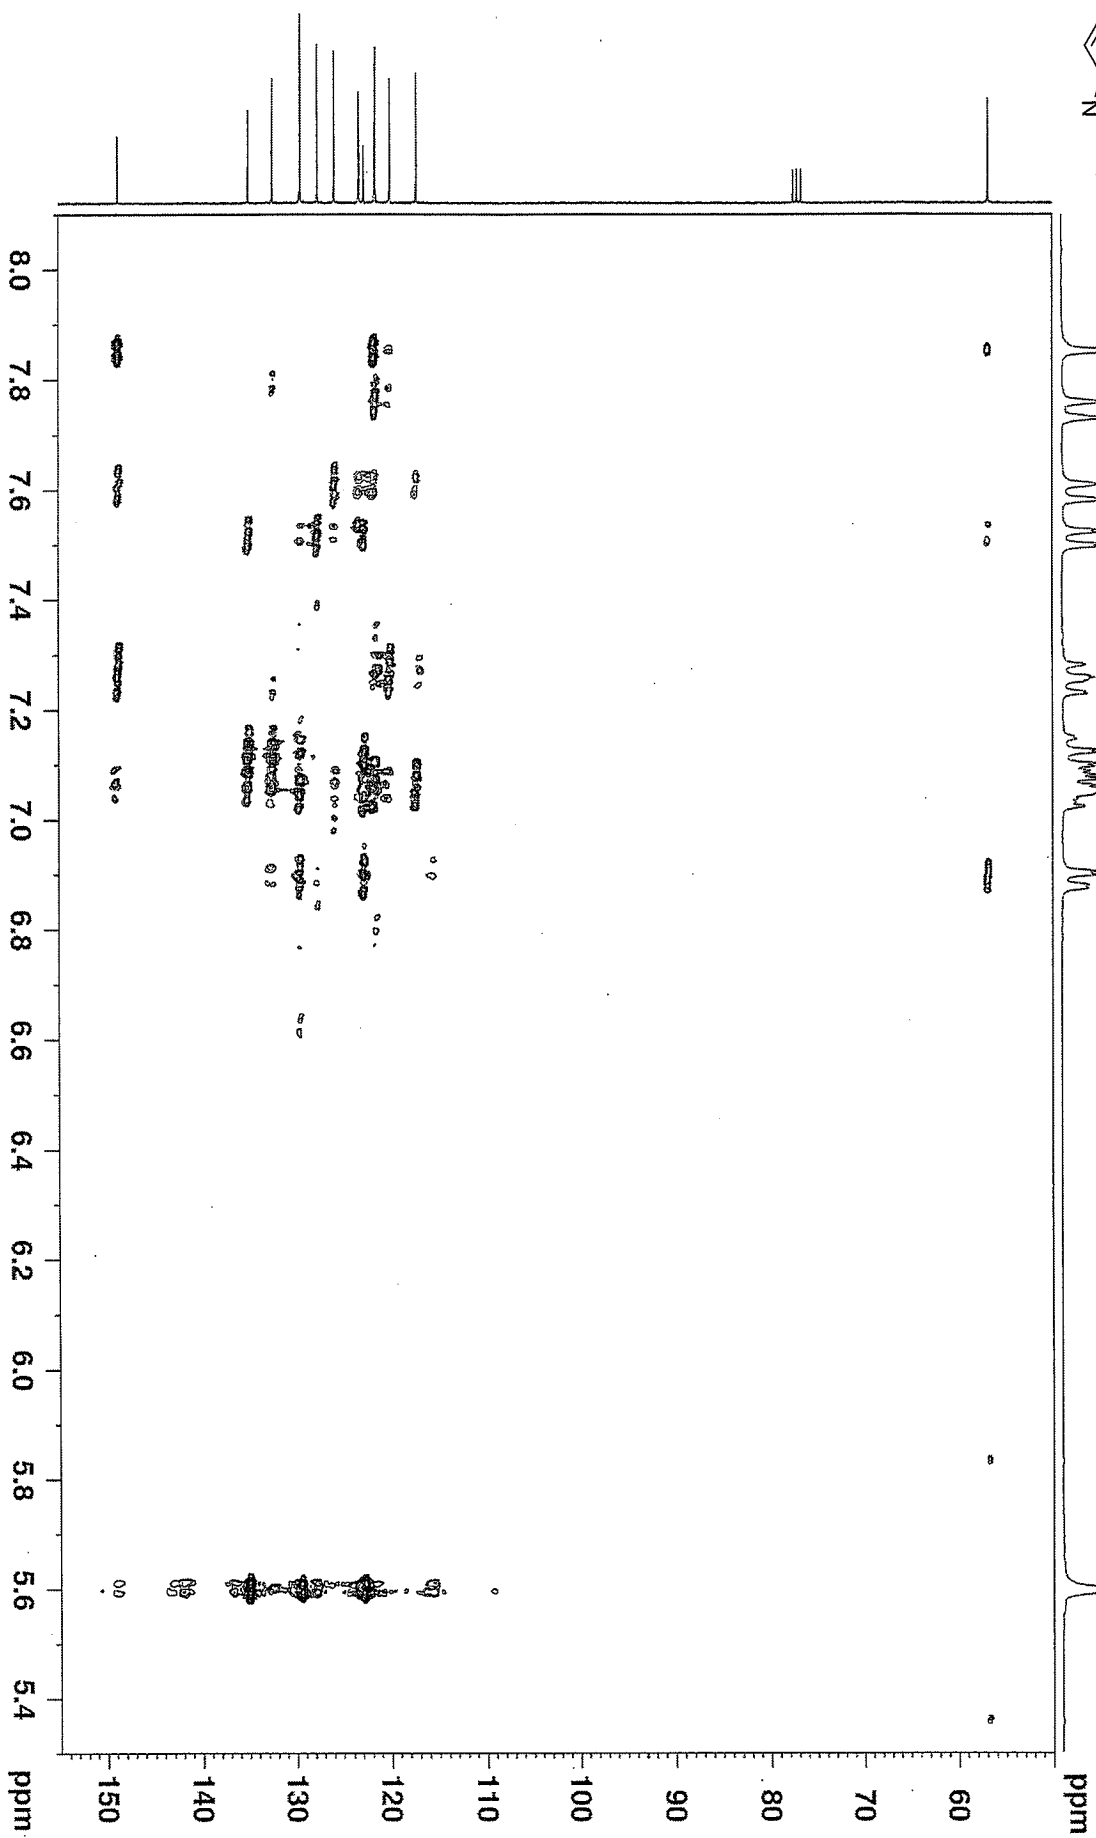



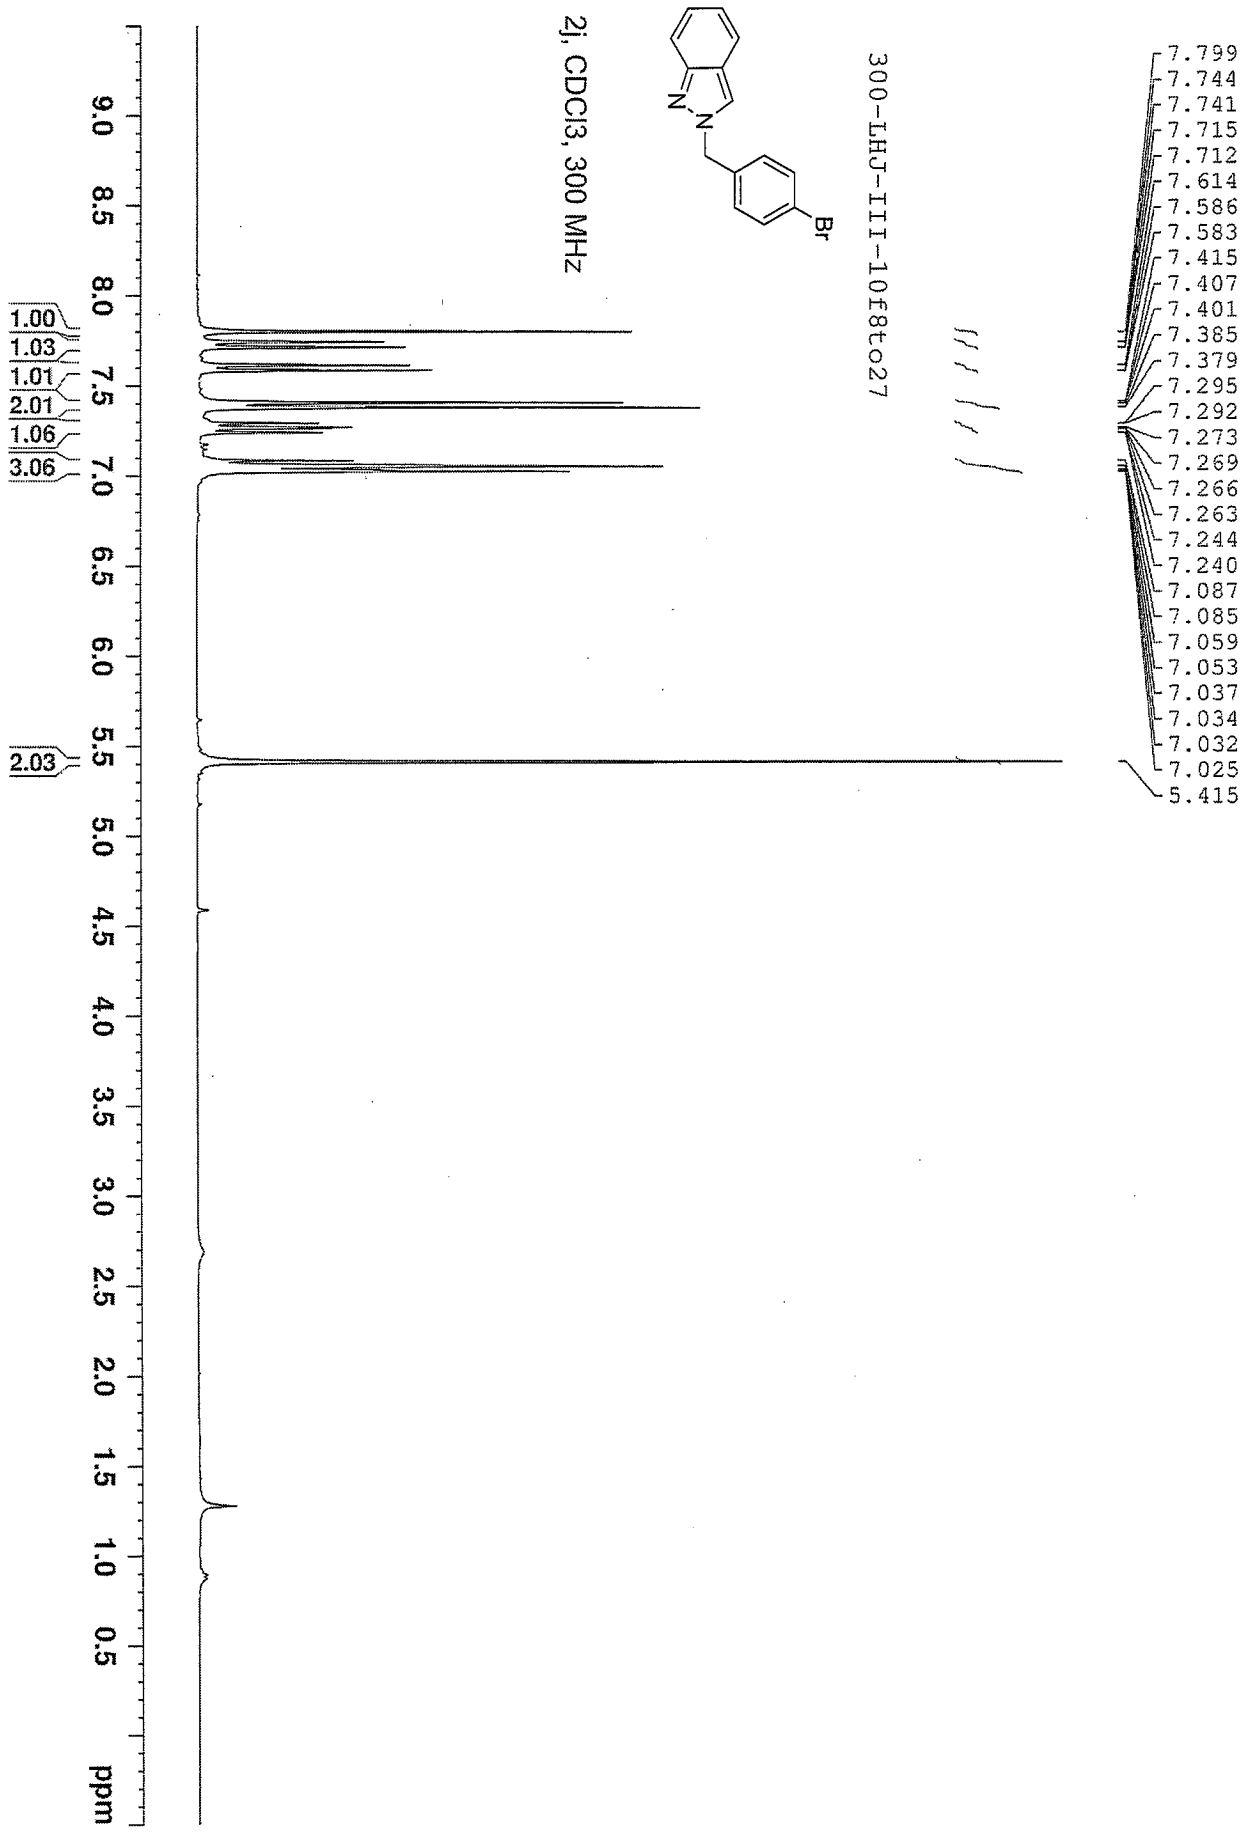

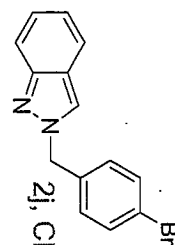

300-LHF-III-10F8to27

122.083  
121.824  
121.672

148.78  
134.59  
131.69  
129.23  
125.92  
122.73  
122.08  
121.82  
121.67  
119.97  
117.25

77.43  
77.00  
76.58

56.37

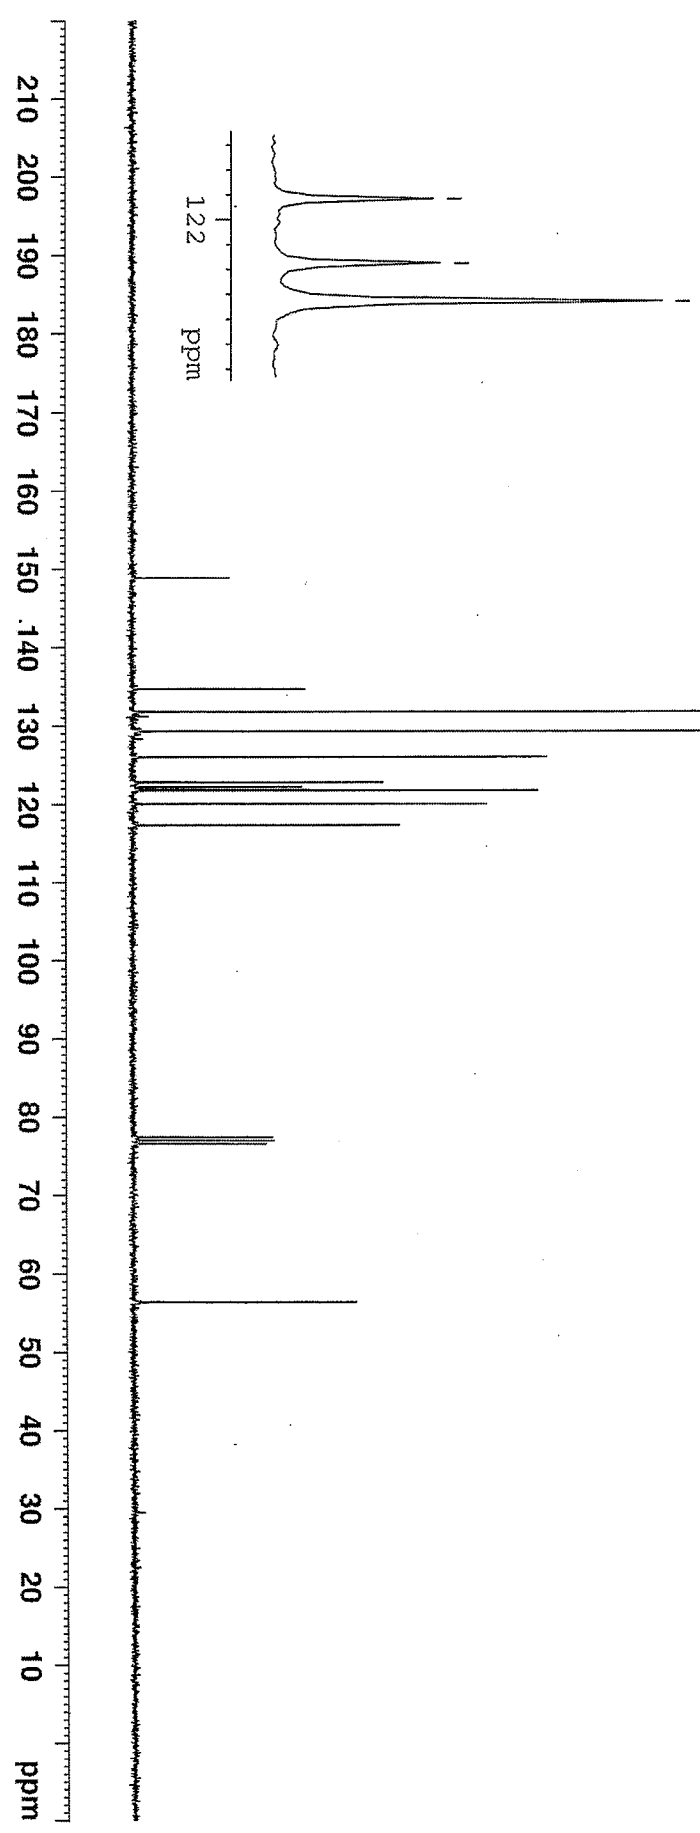

300-LHJ-III-10f8to27 (HSQC)

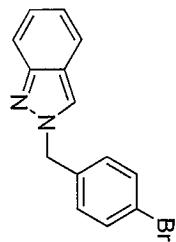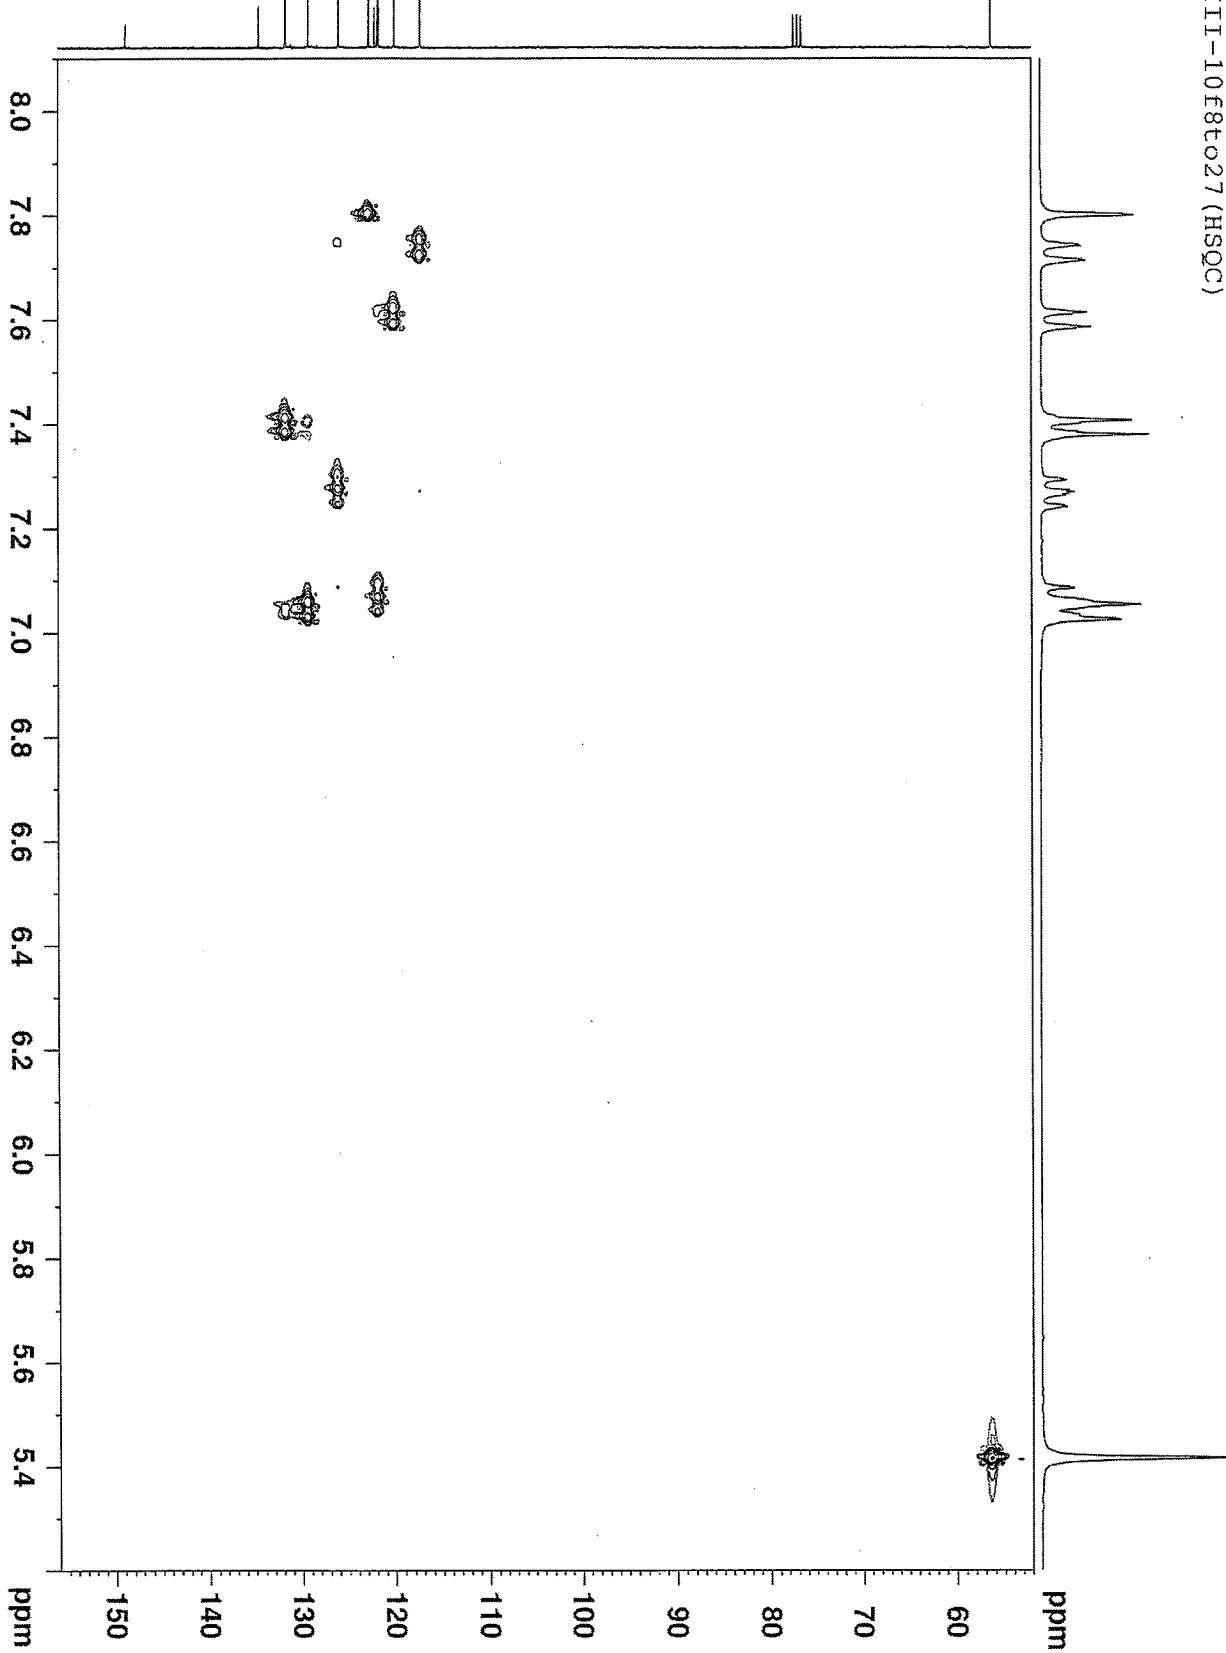

300-LHJ-III-10F8t027 (HMBC)

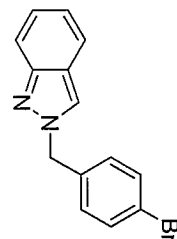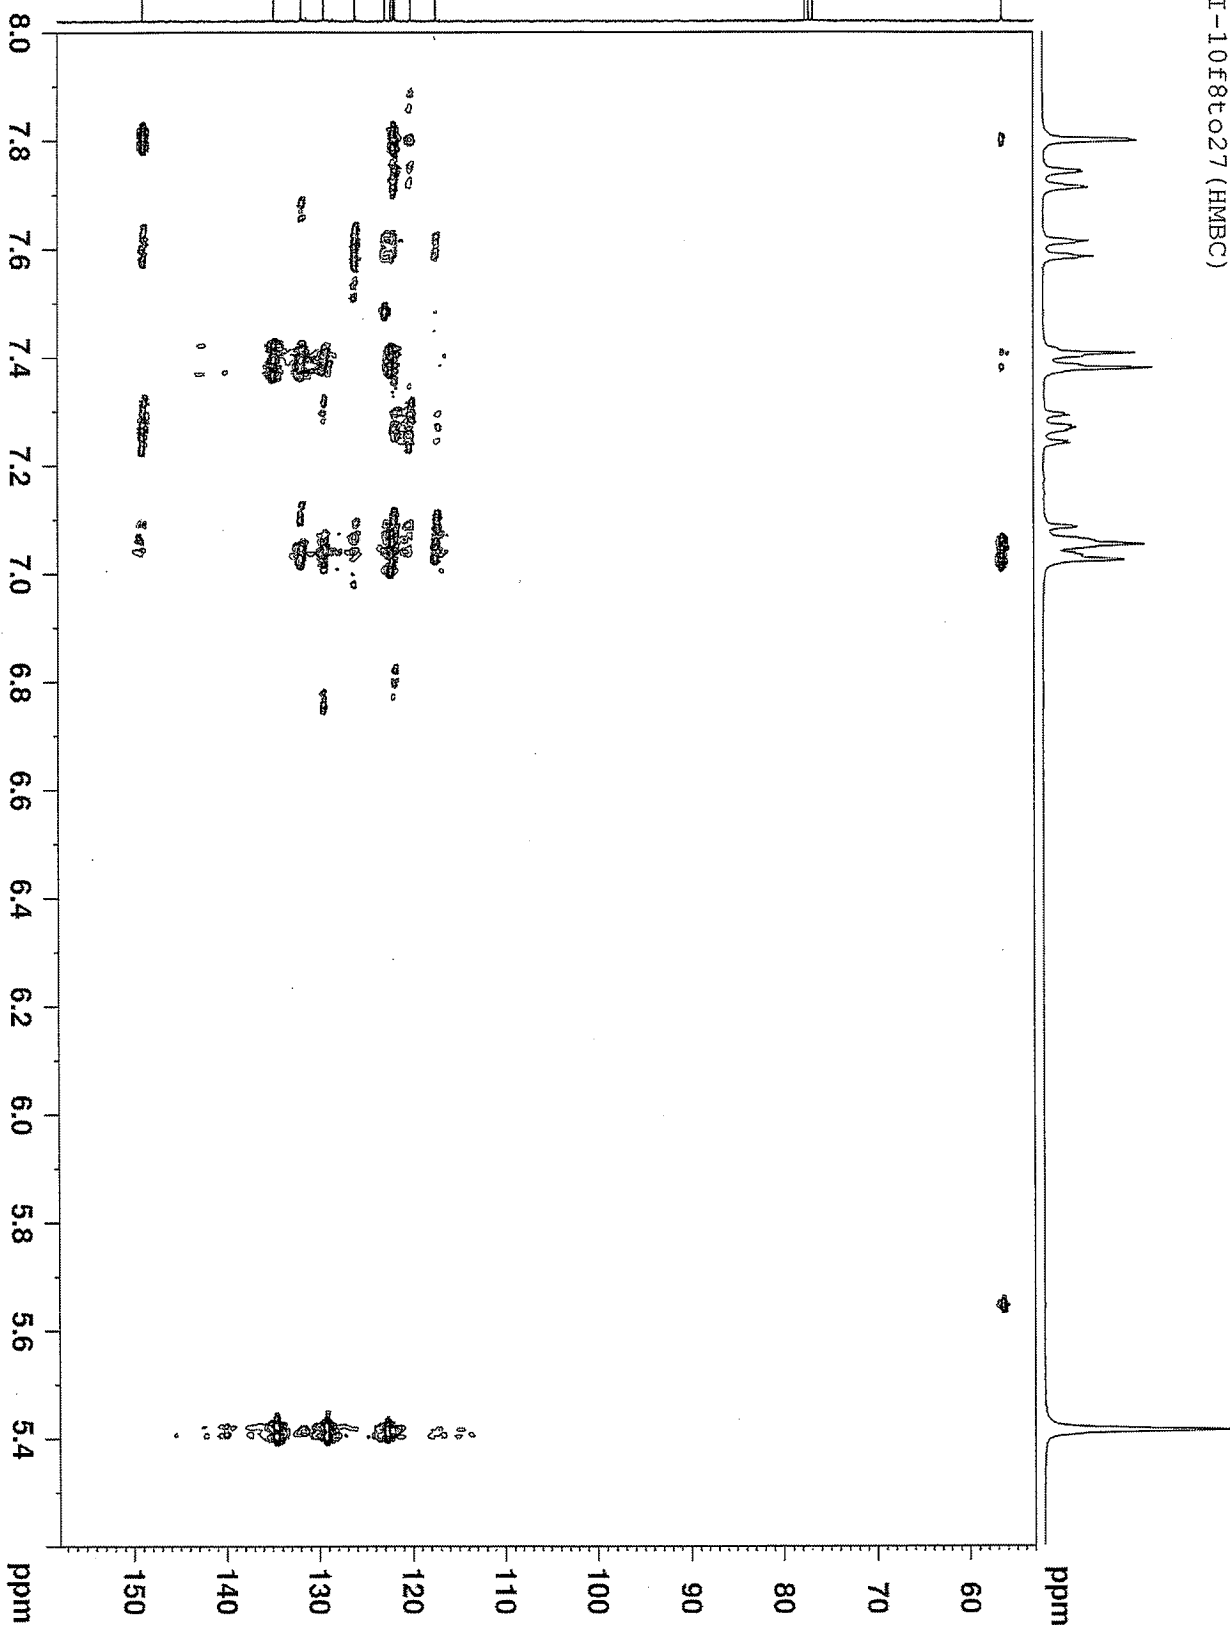

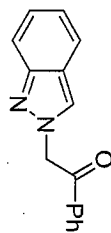

300-LHJ-II-278ft

2K, CDCl<sub>3</sub>, 300 MHz

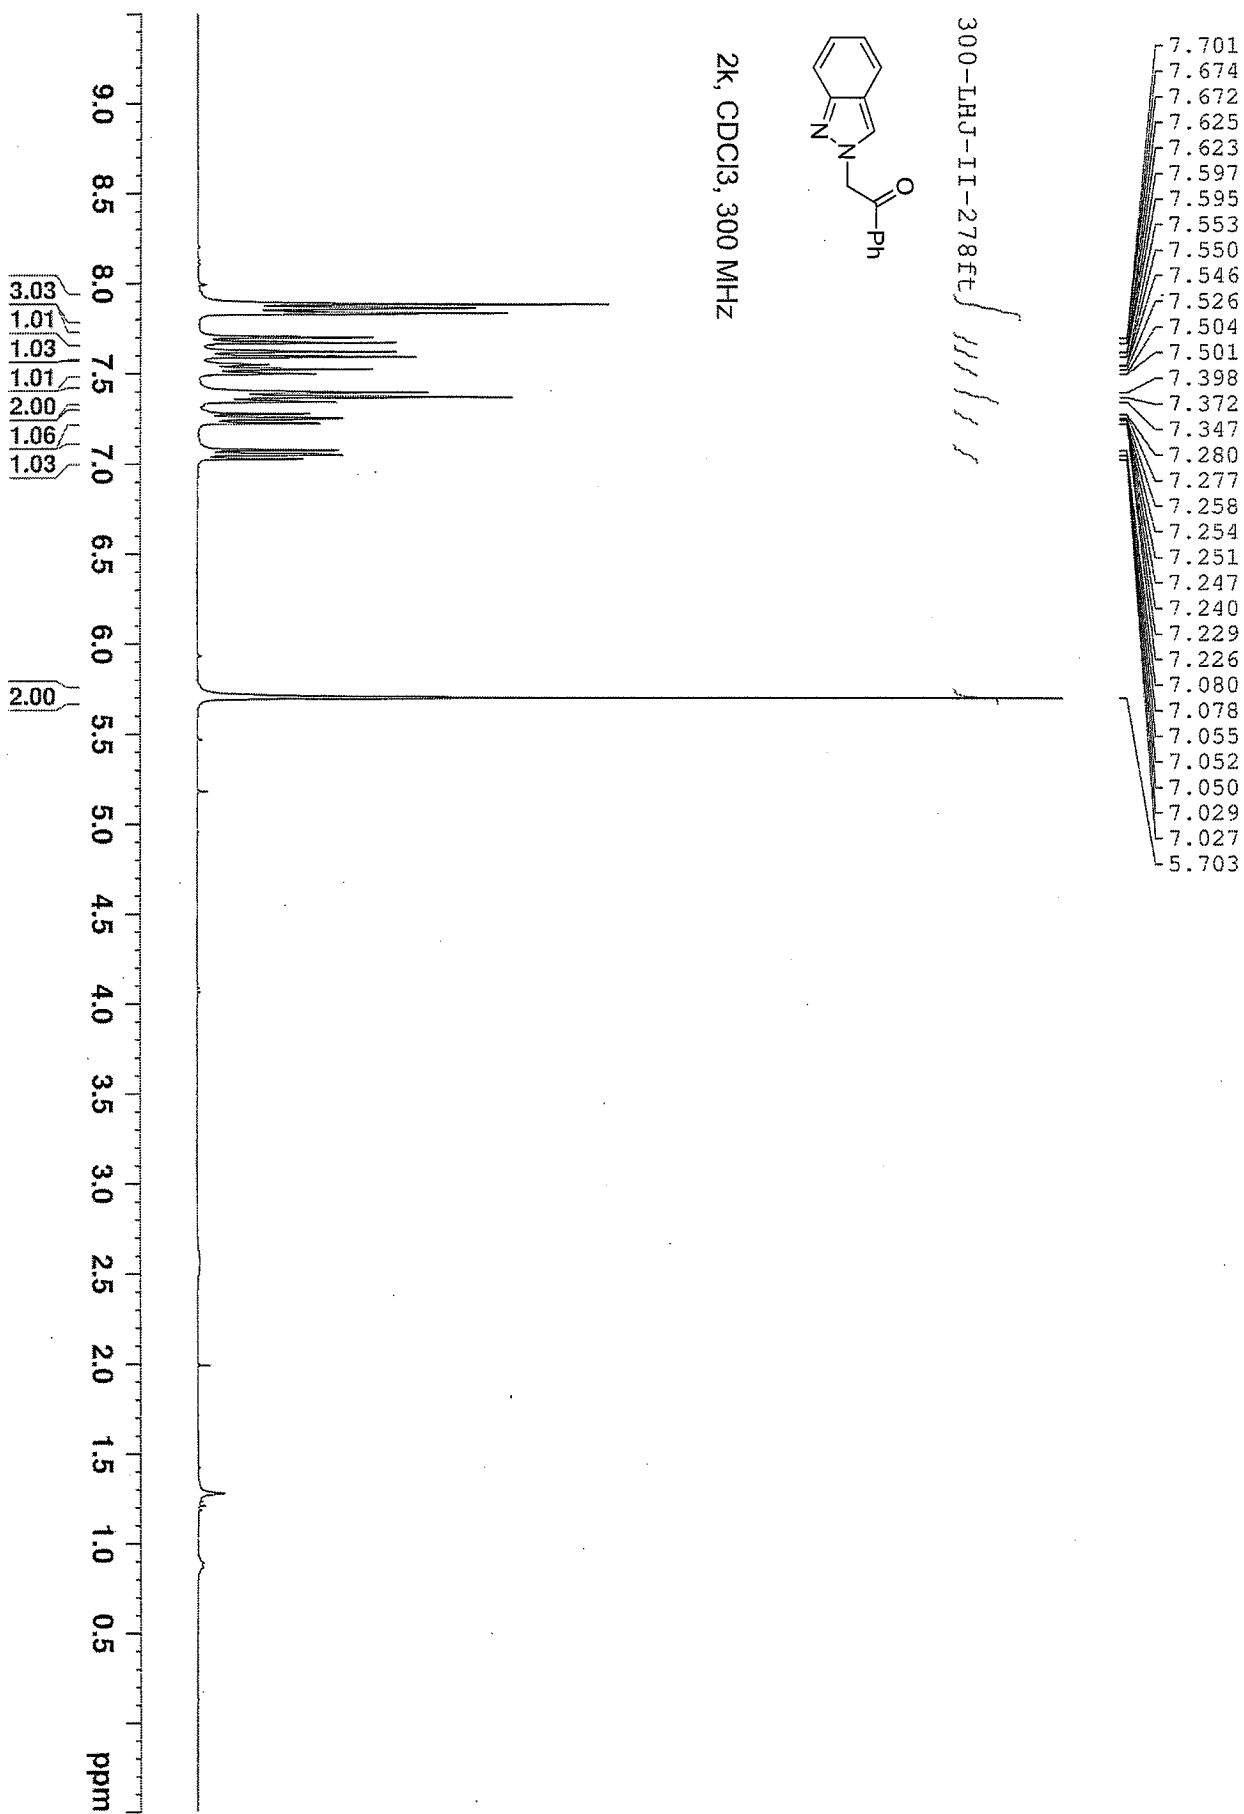

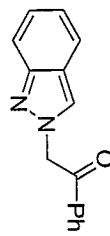

2k, CDCl<sub>3</sub>, 75 MHz

300-LHJ-II-278F44E065

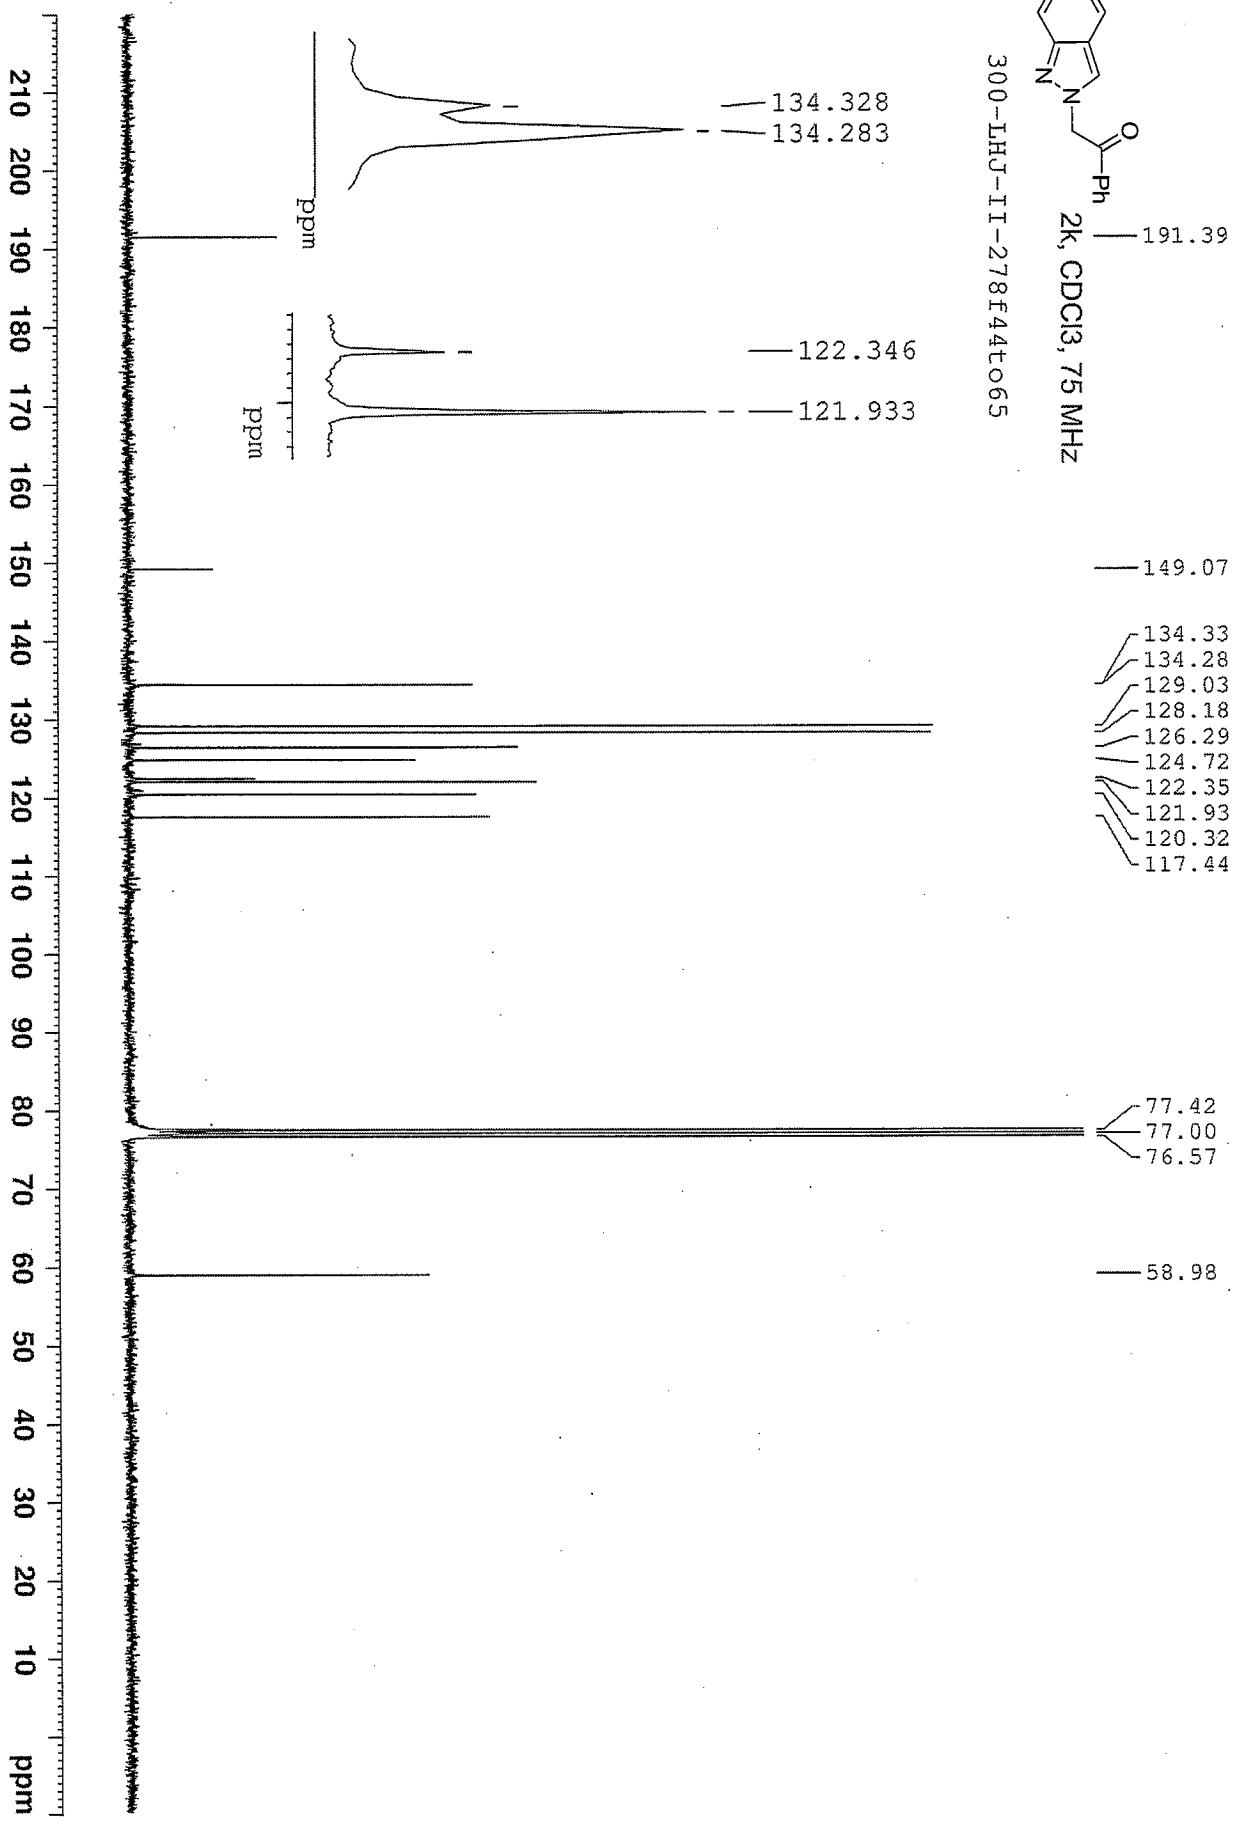

300-LHJ-II-278Ft (HSQC)

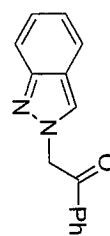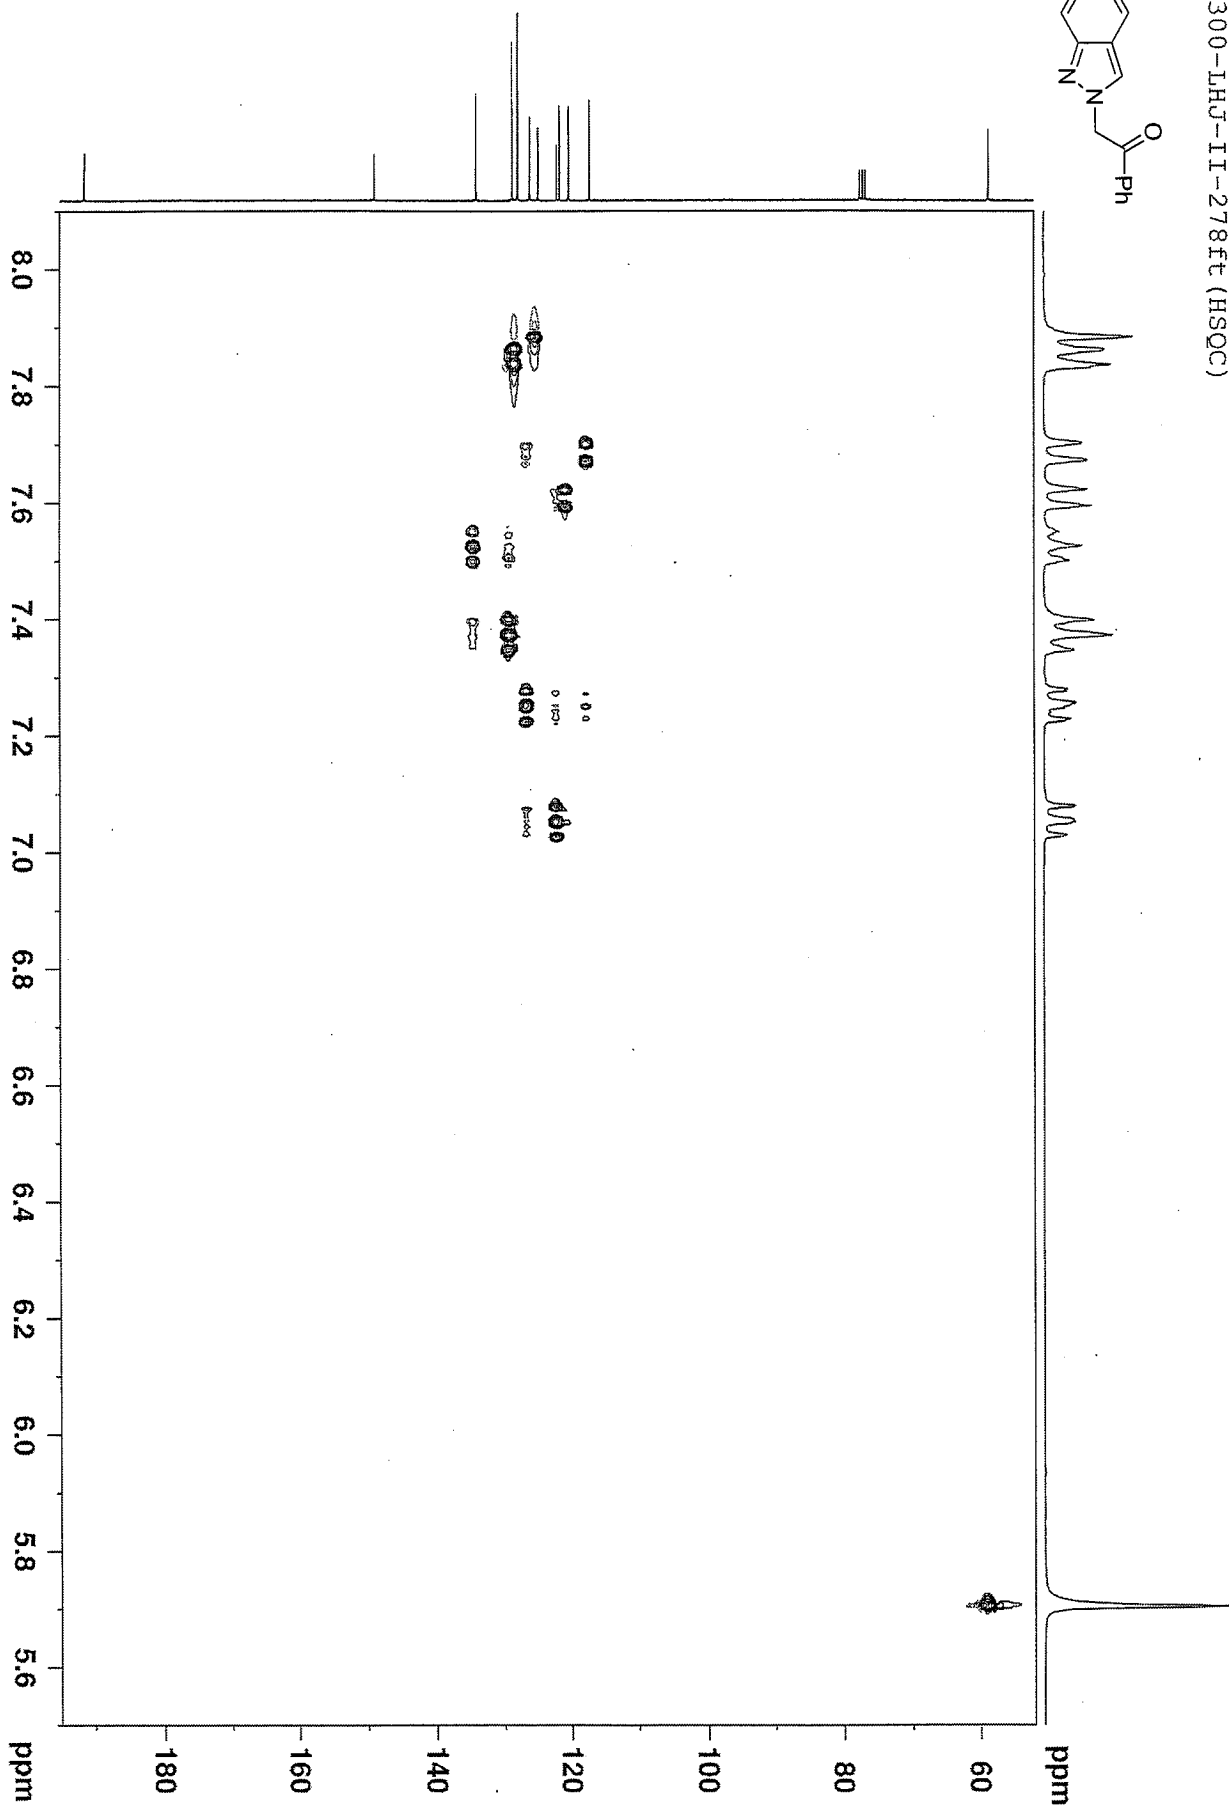

300-LHJ-II-278ft (HMBC)

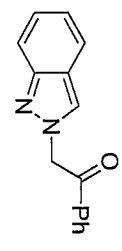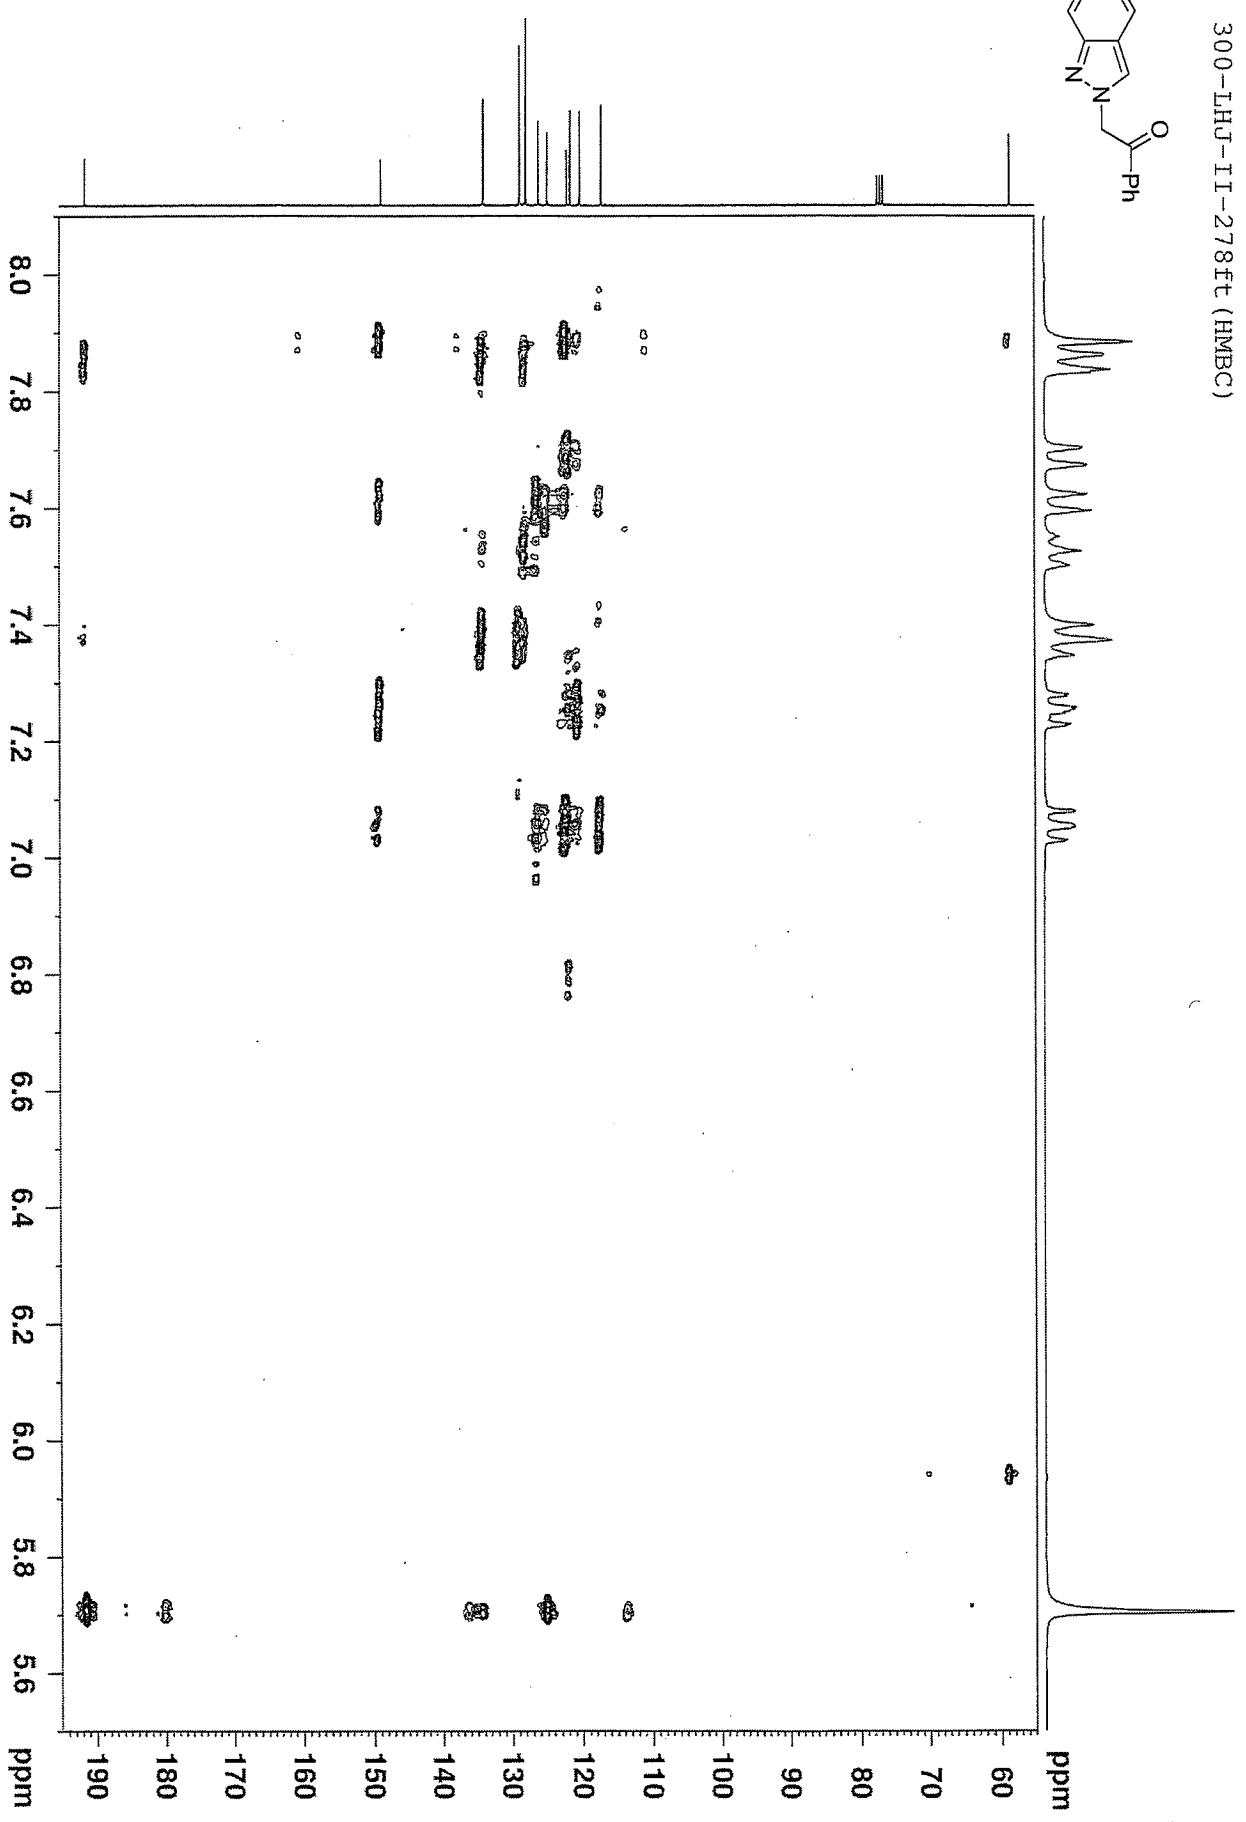



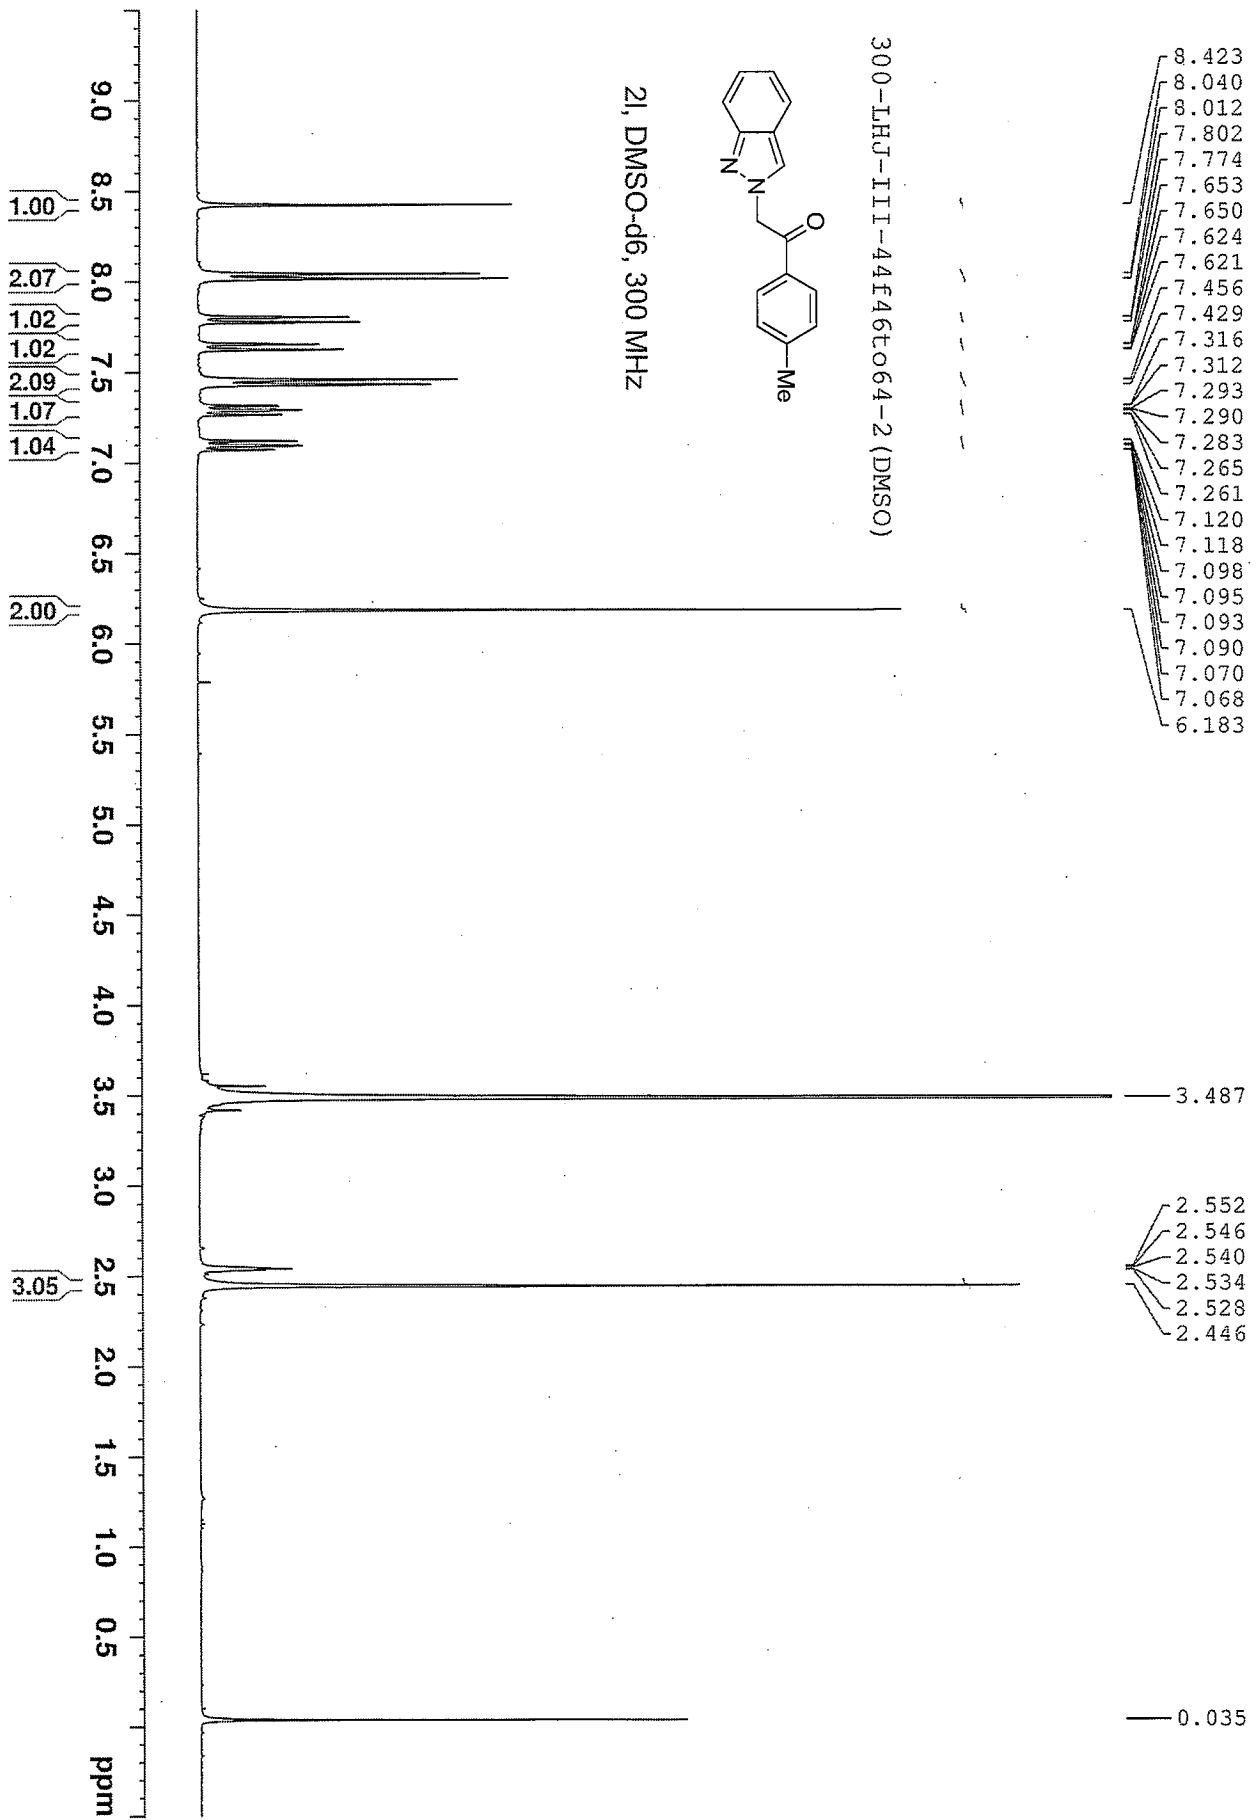

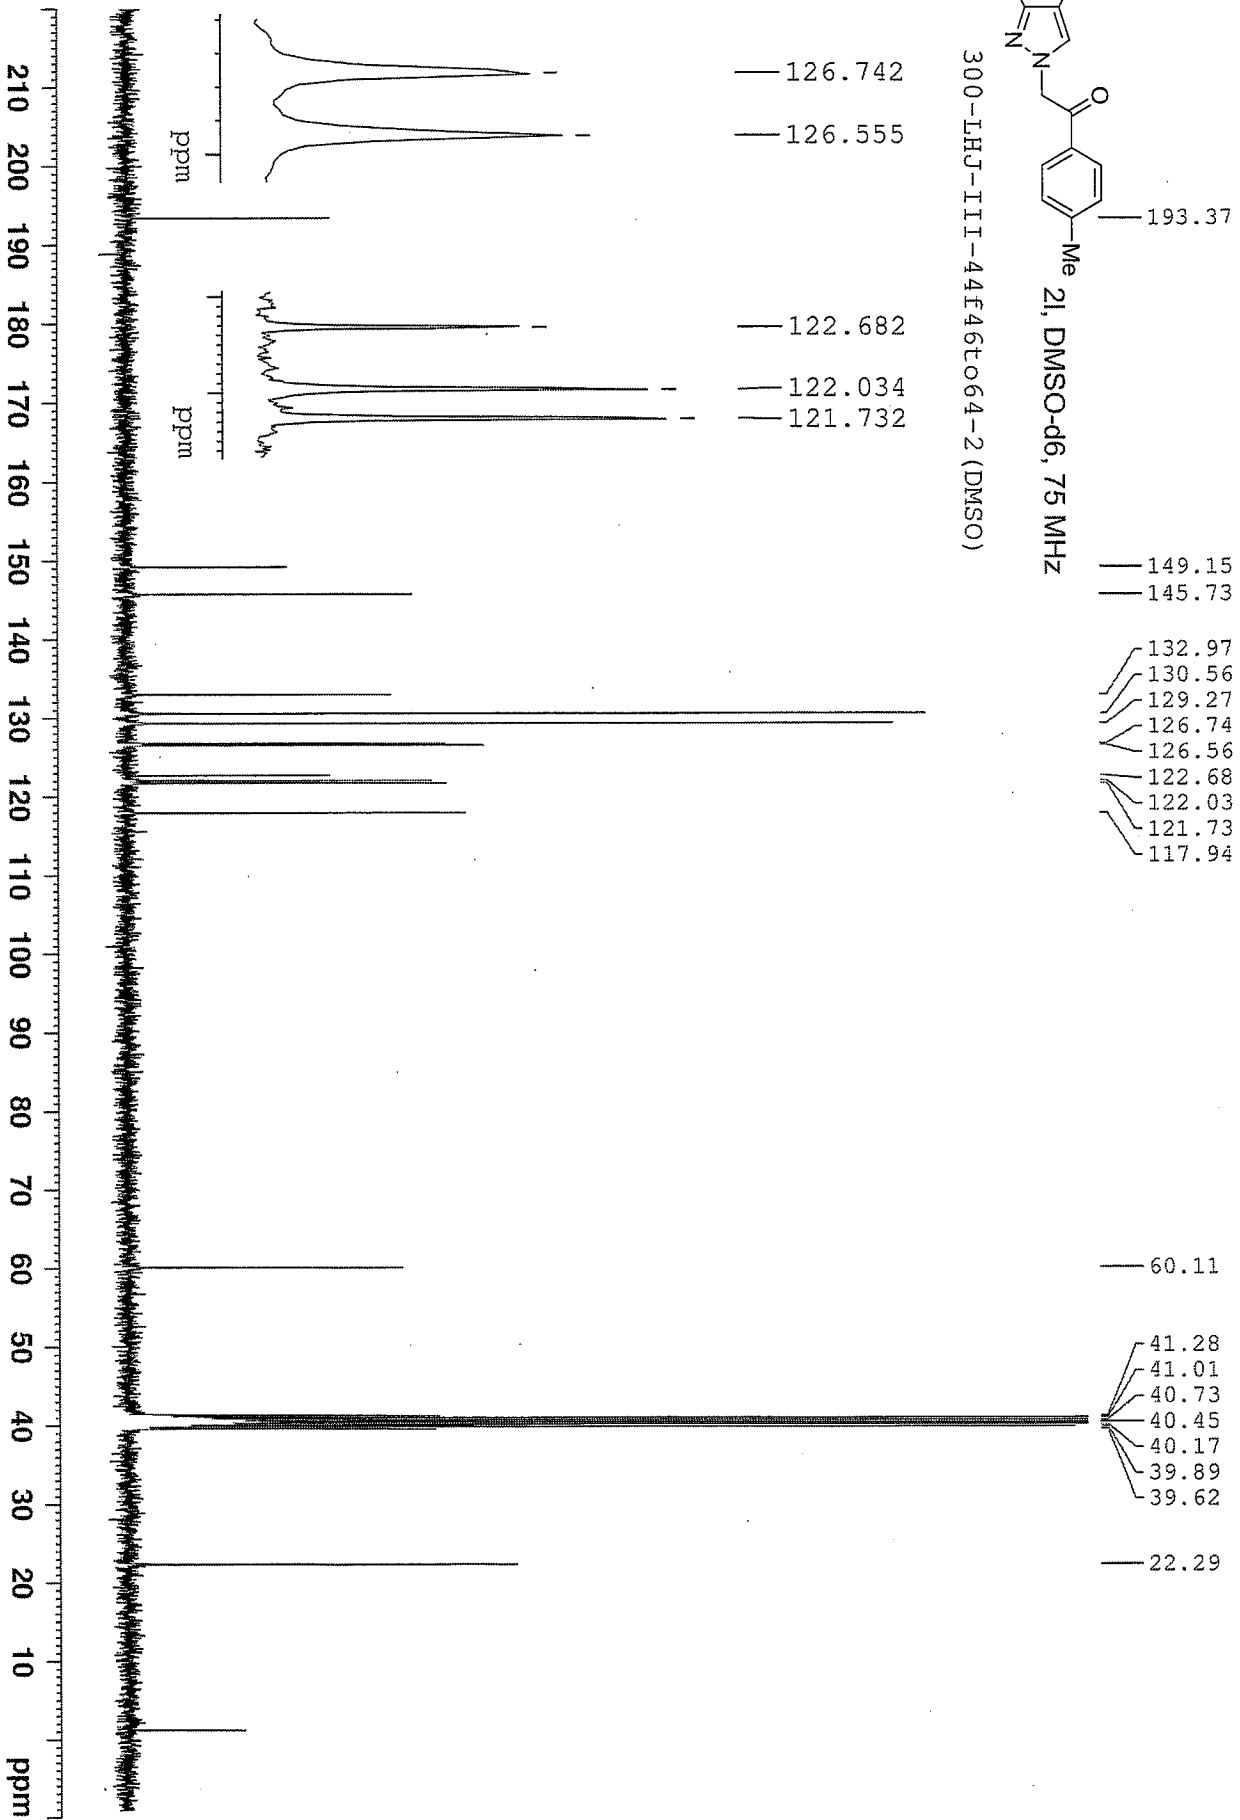

300-LHJ-III-44F46t064-2 (HSQC)

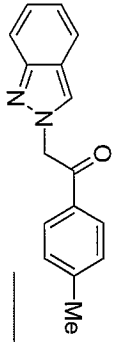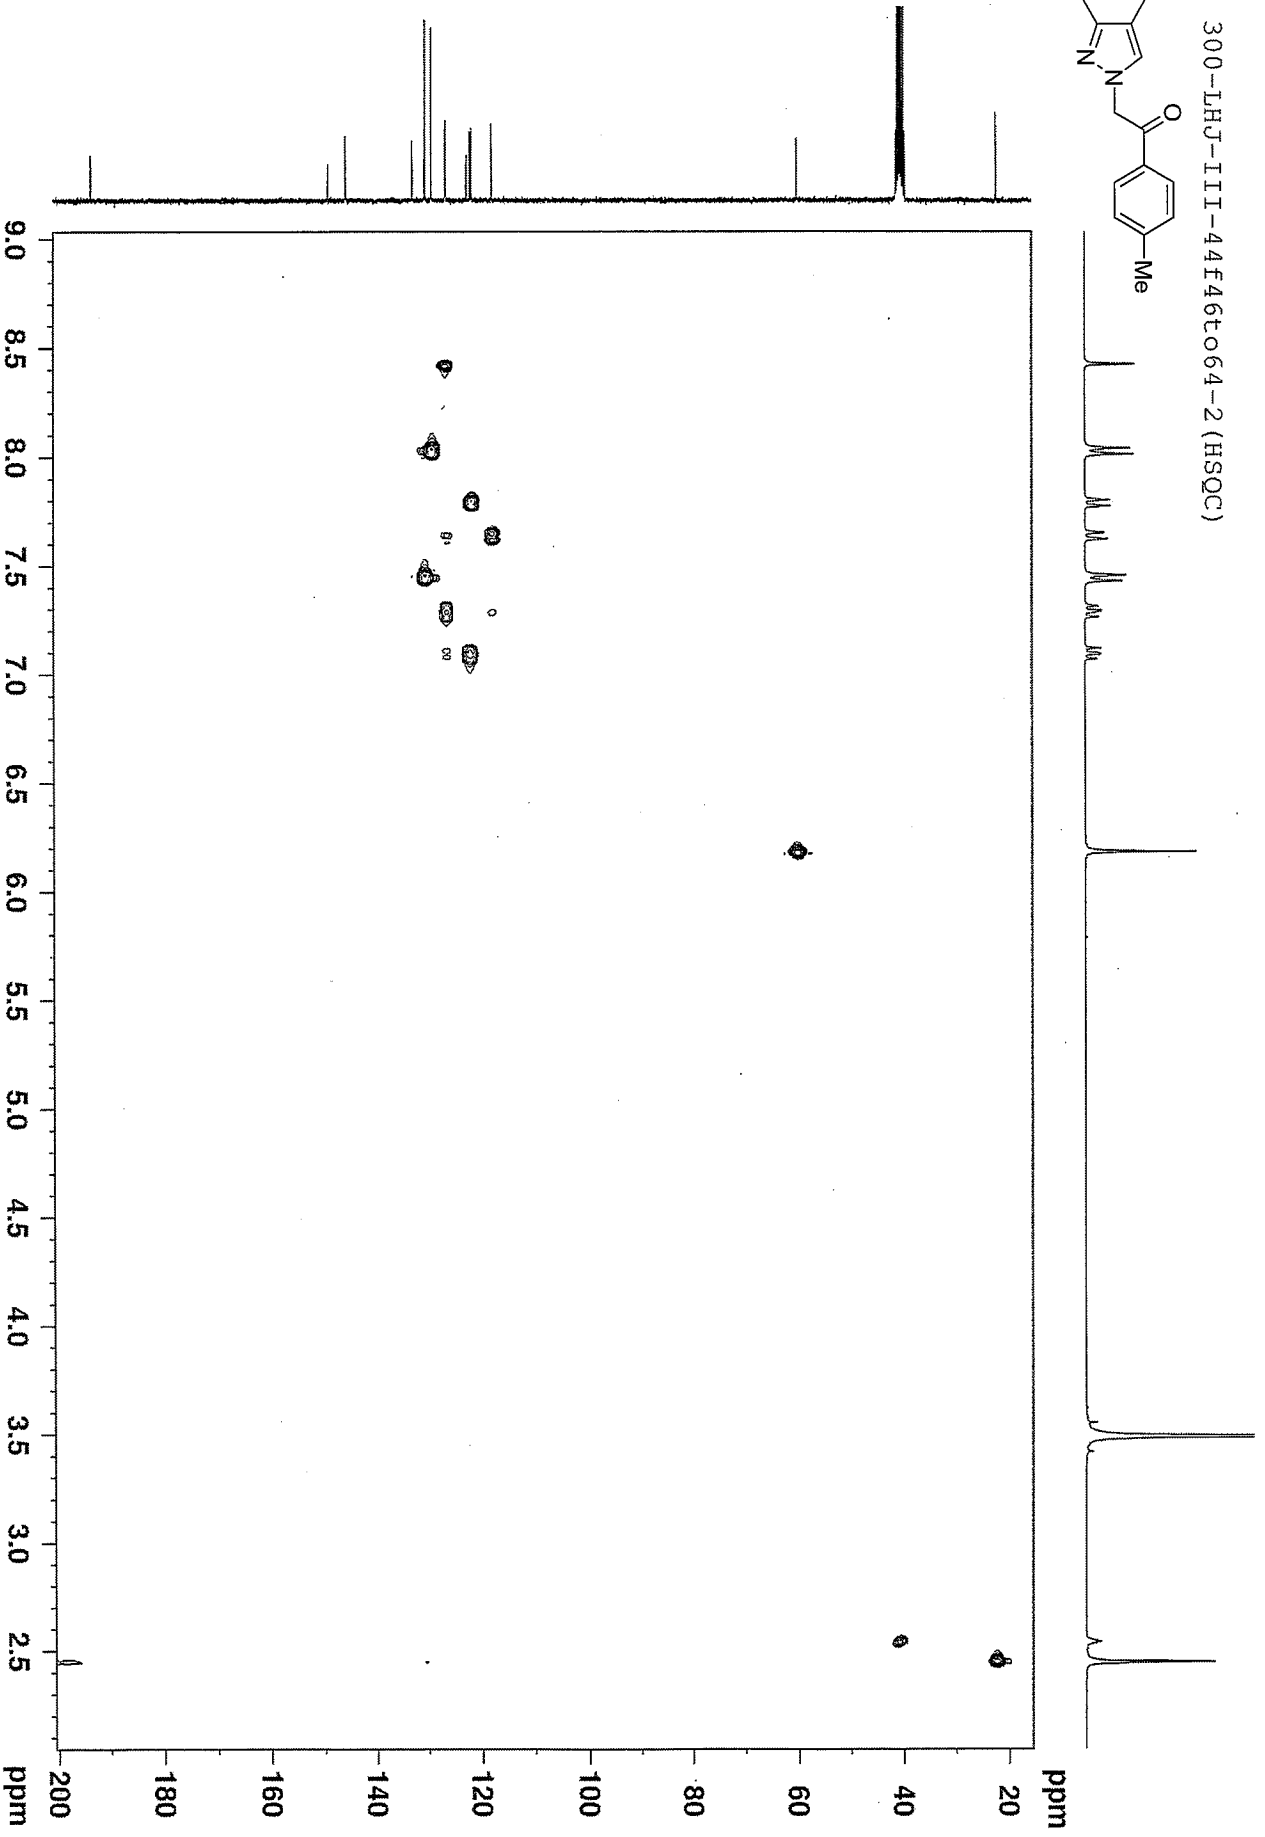

300-LHJ-III-44F46t064-2 (HMBC)

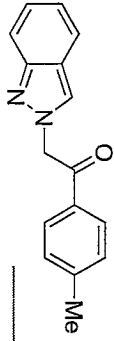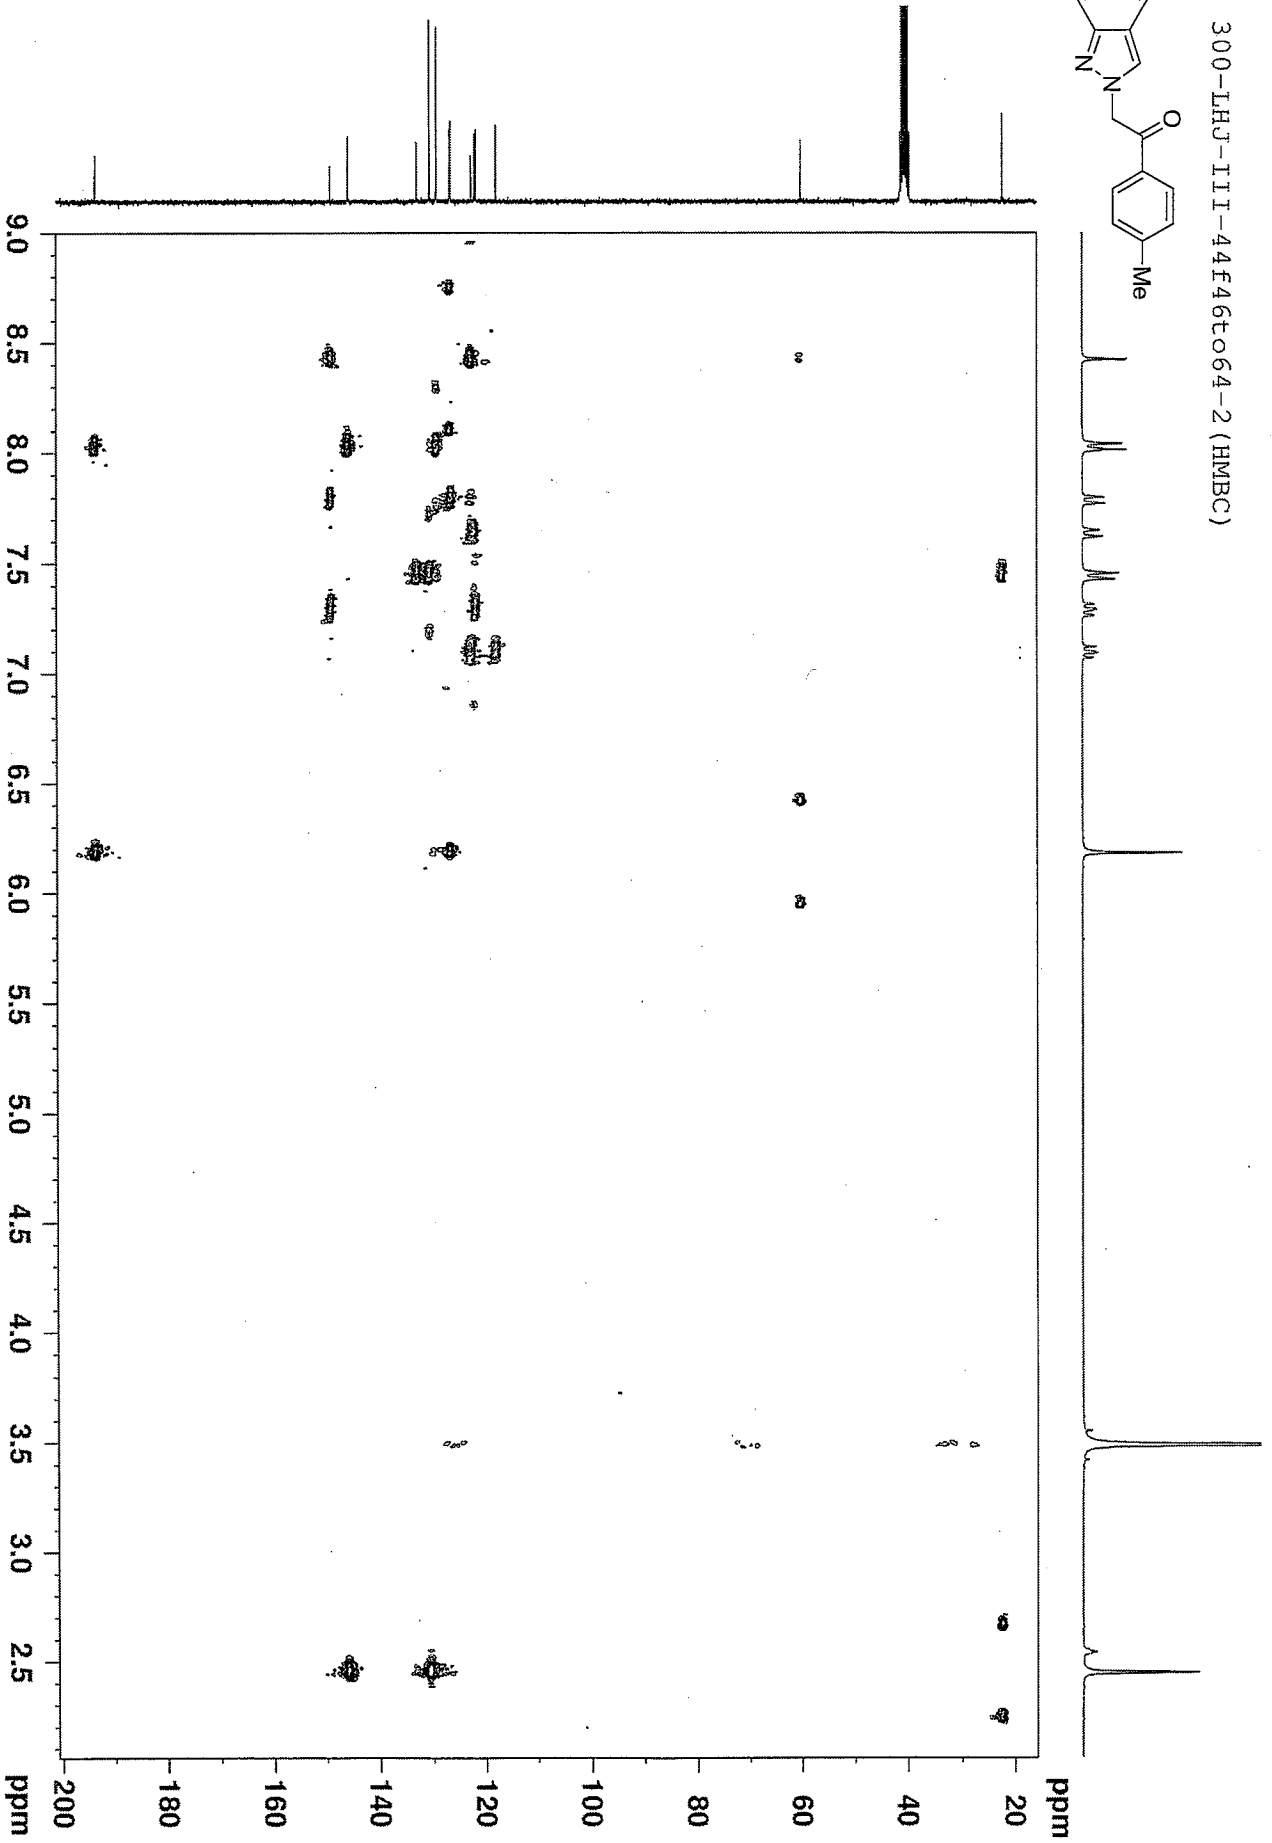

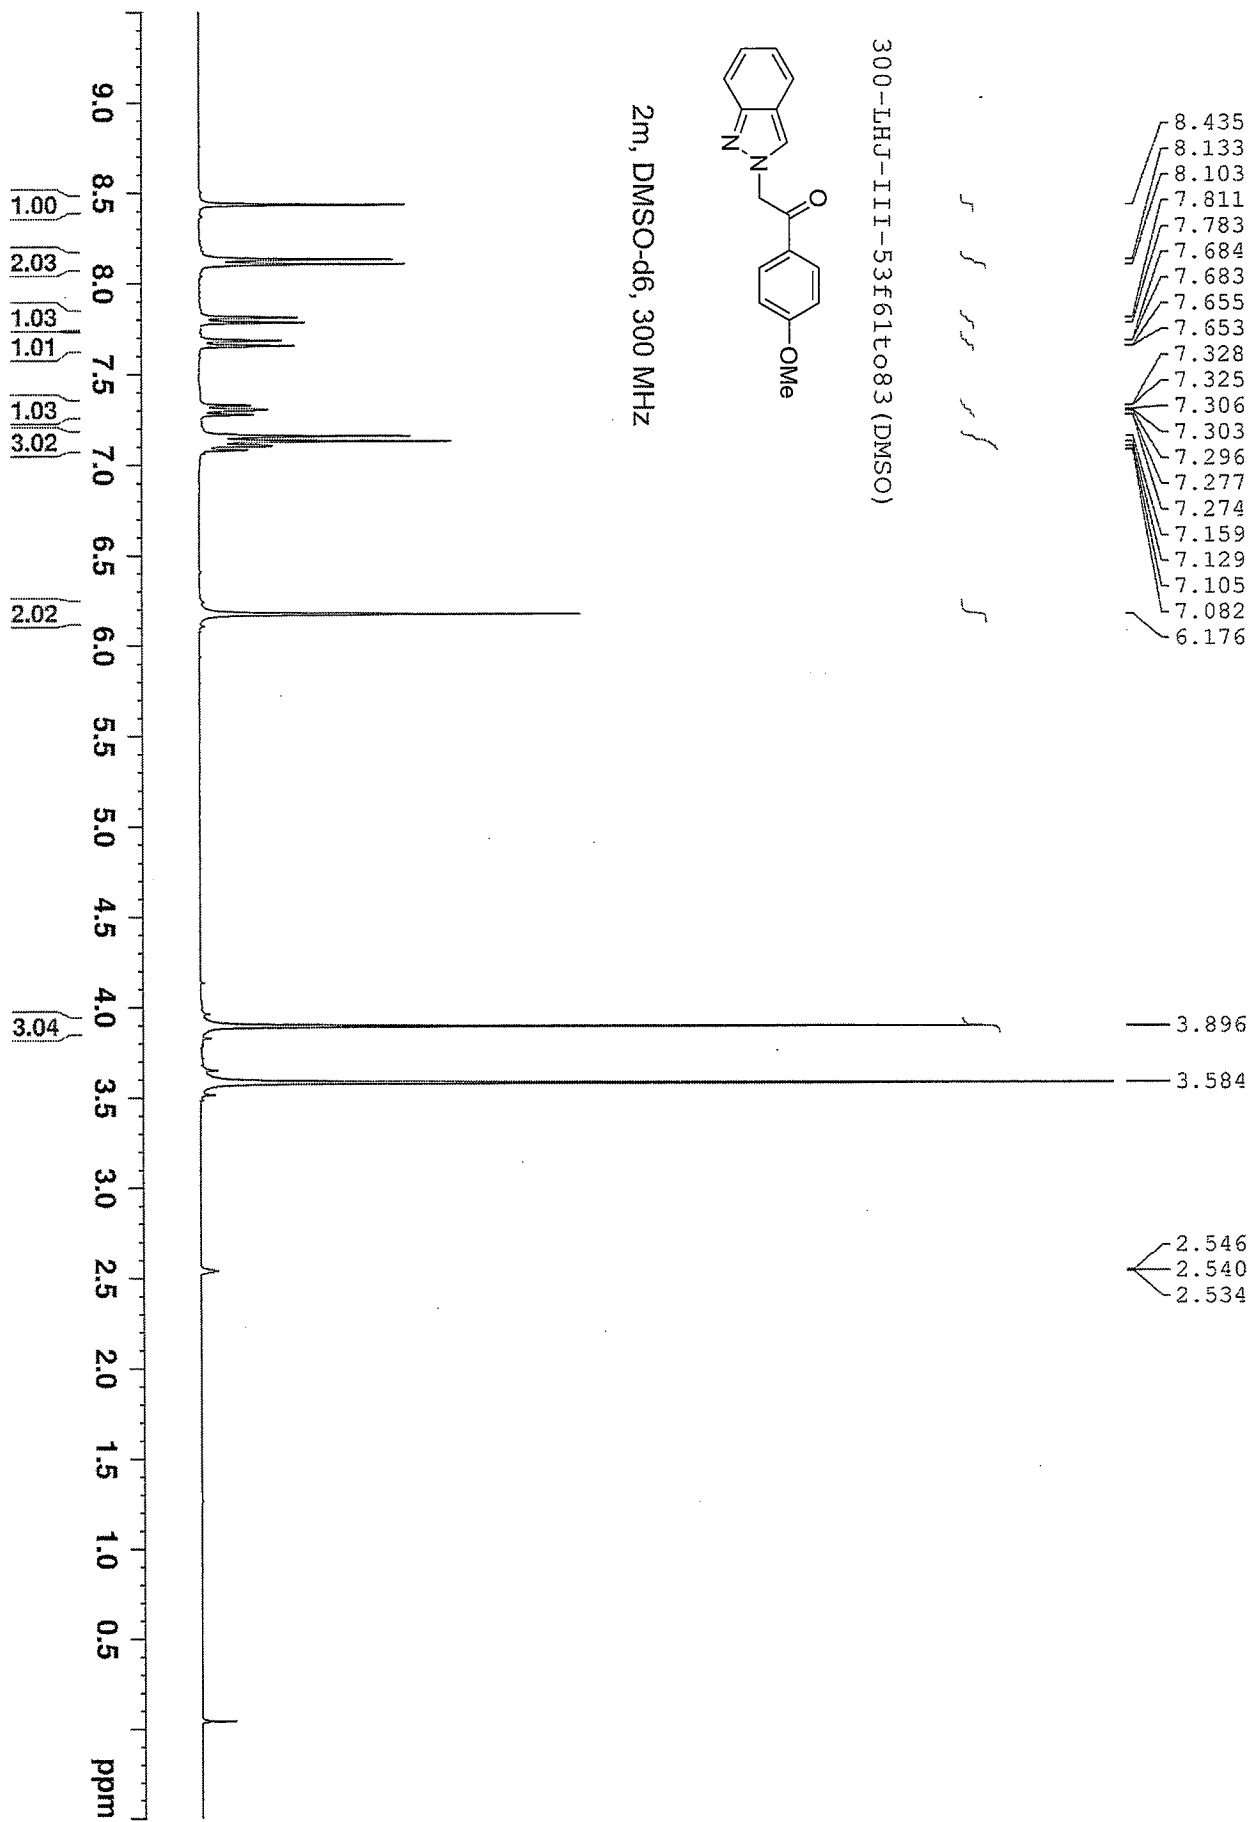

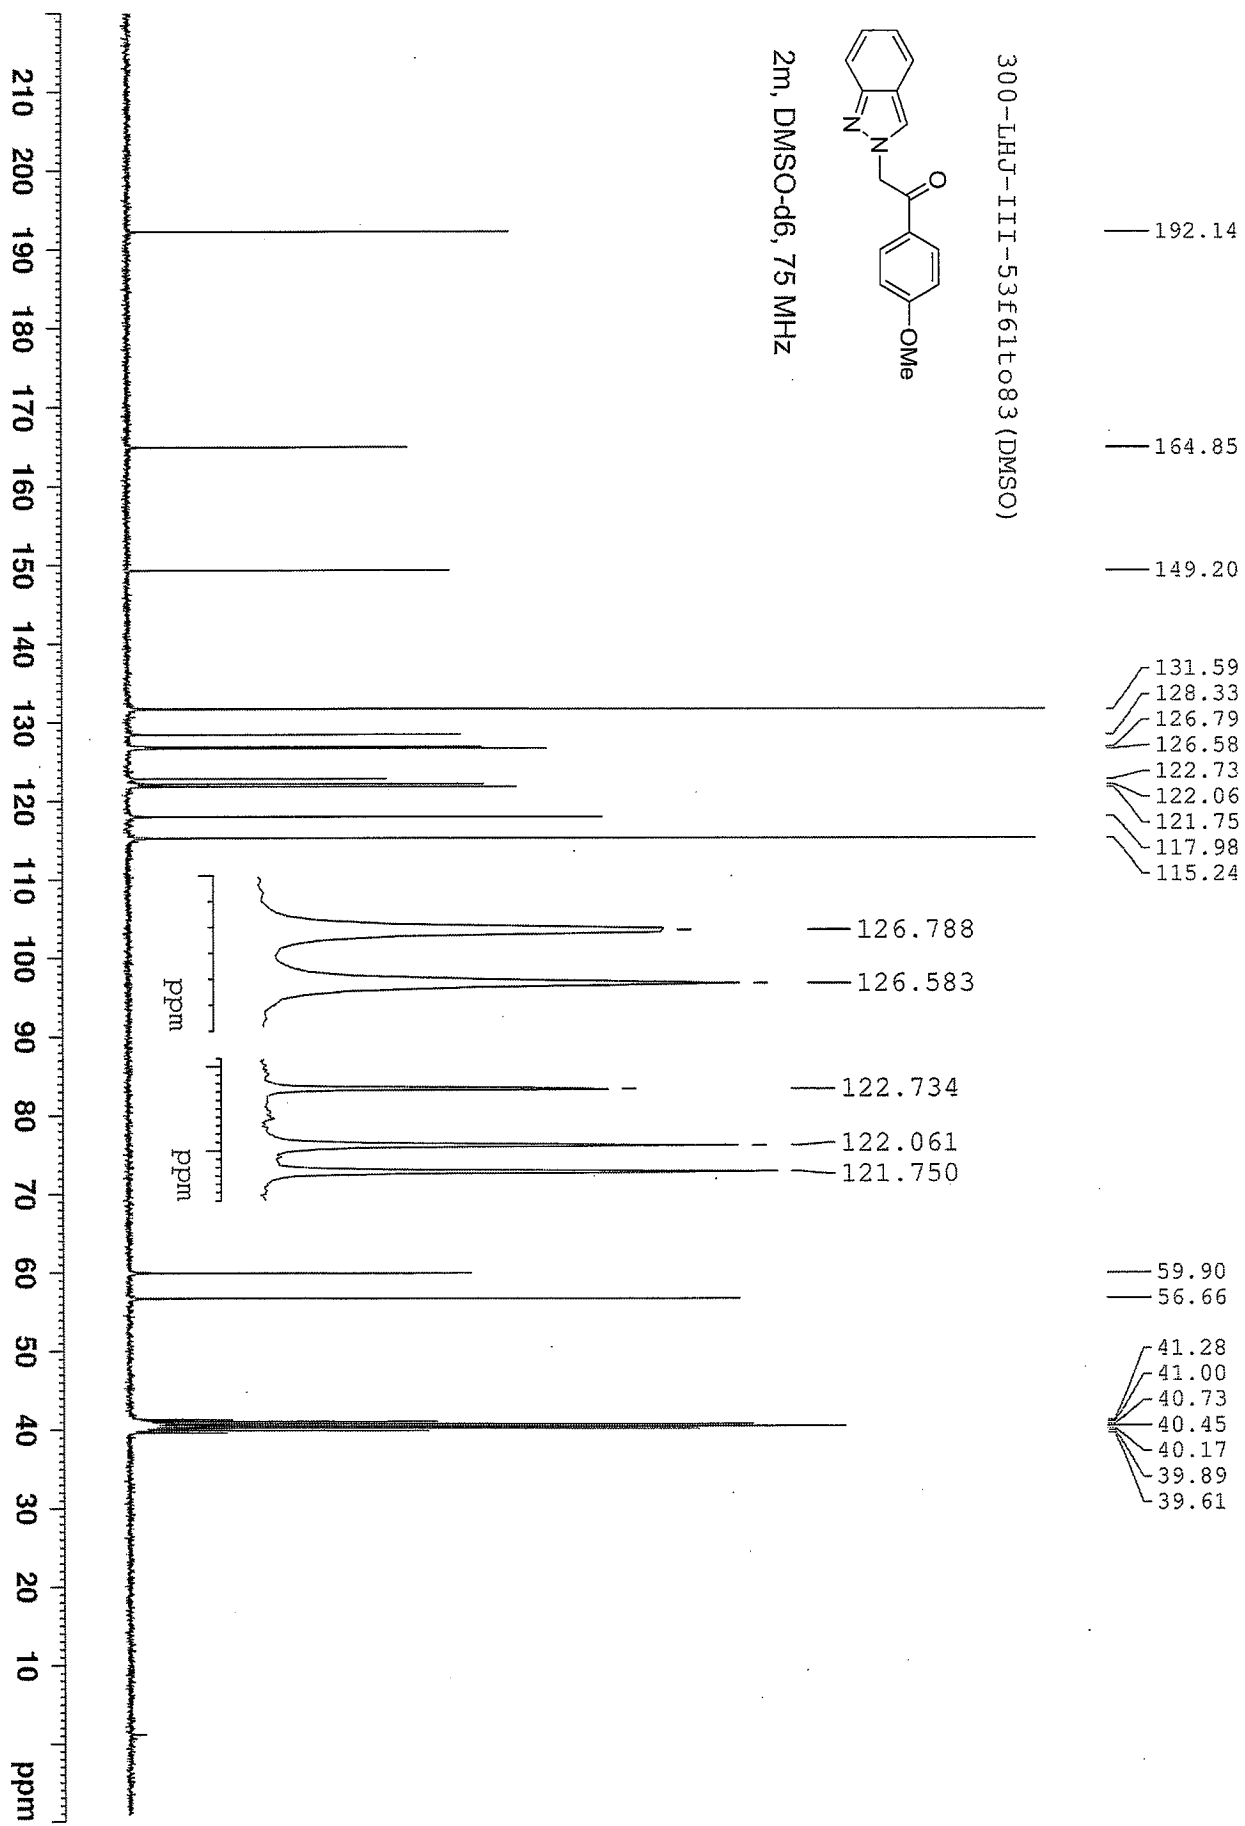

300-LHJ-III-53F61t083 (HSQC)

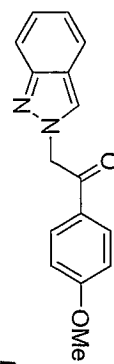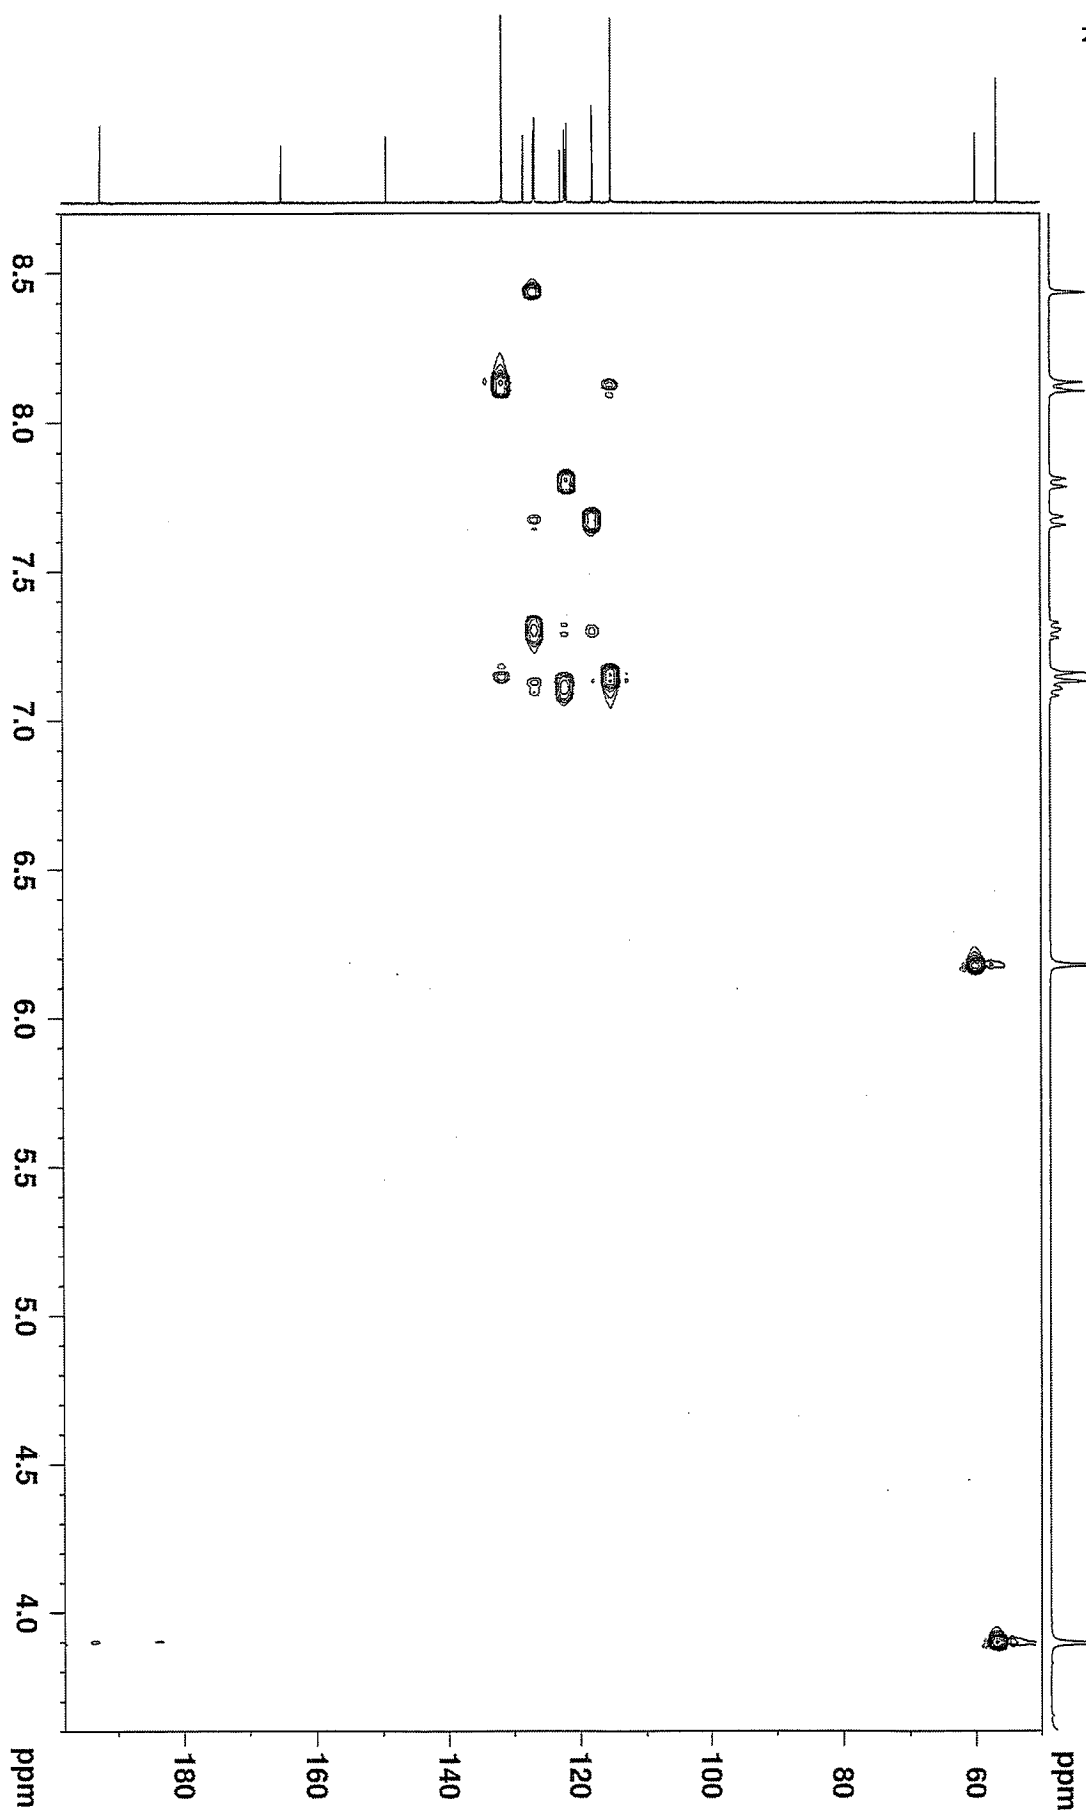

300-LHJ-III-53F61t083 (HMBC)

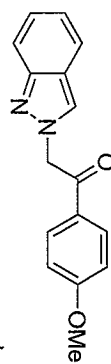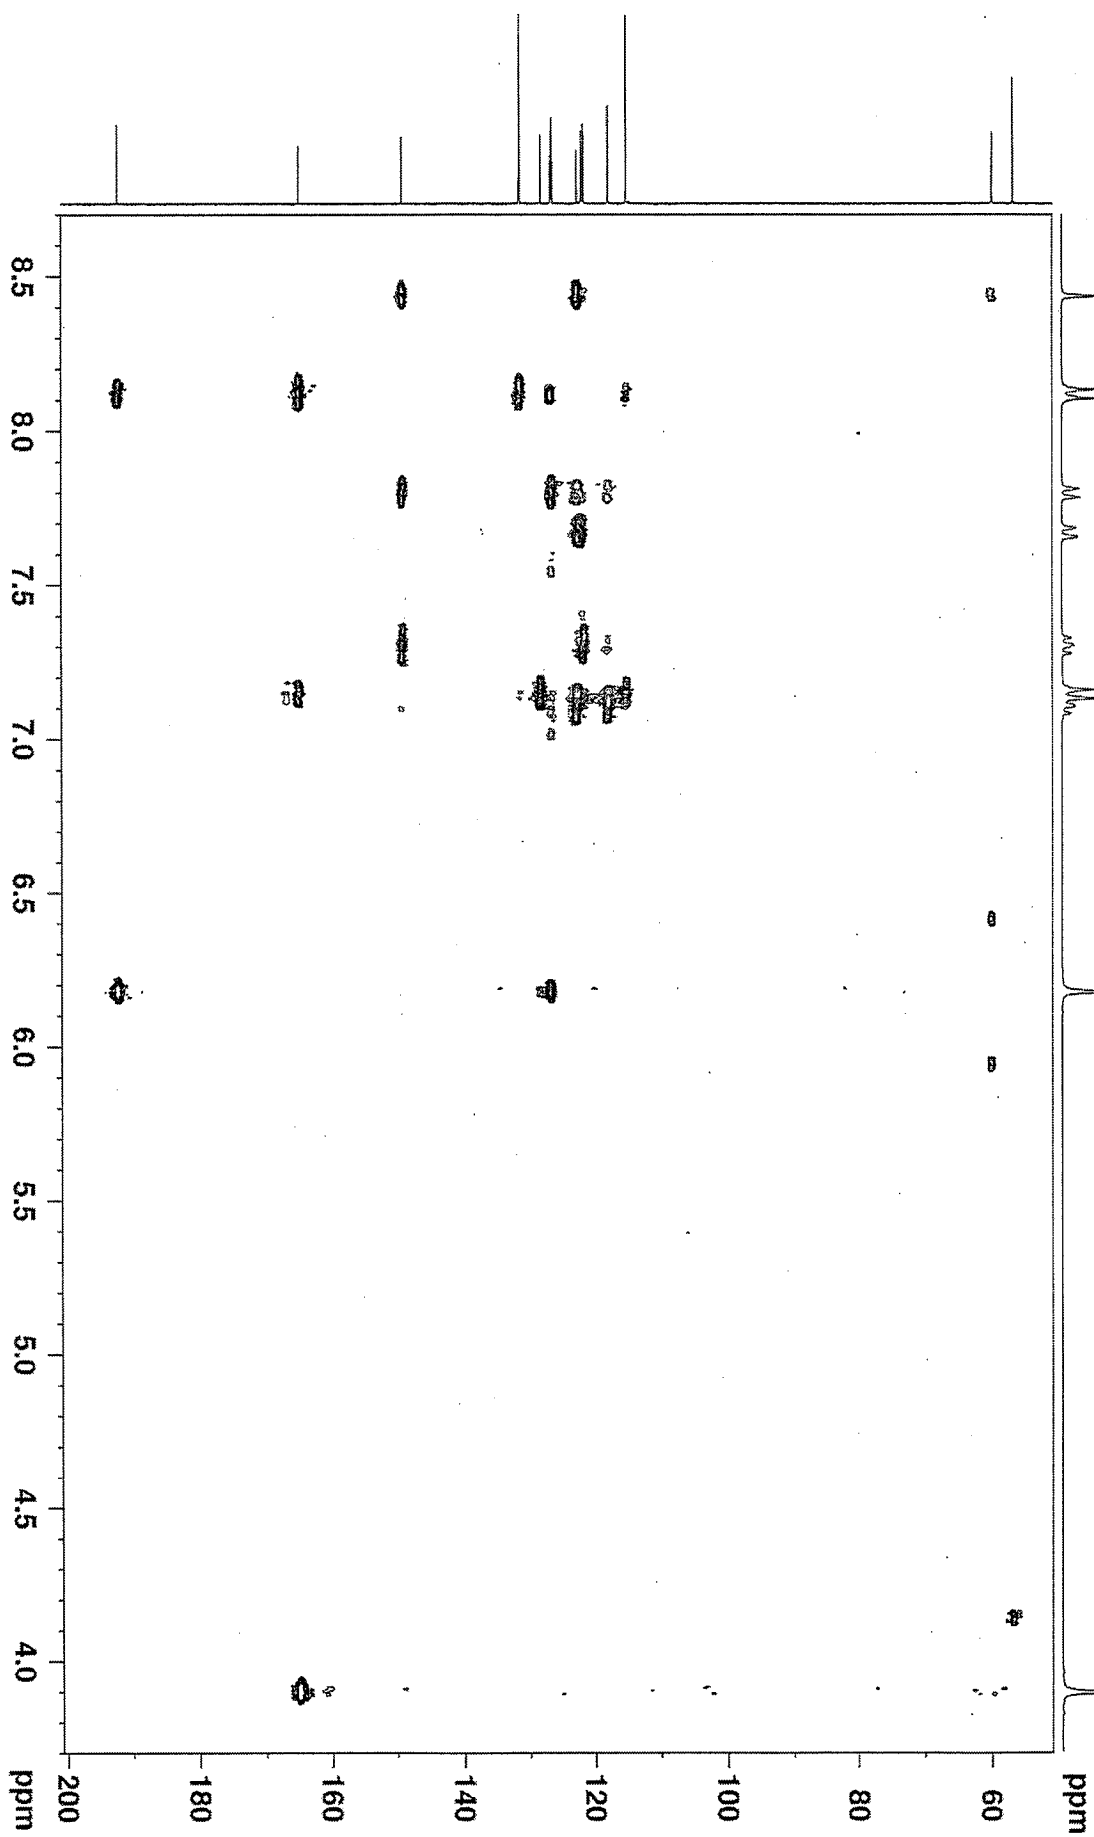



2n, DMSO-d6, 300 MHz

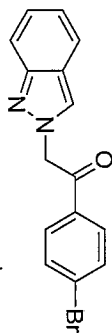

300-LHF-III-42F42C083-2 (DMSO)

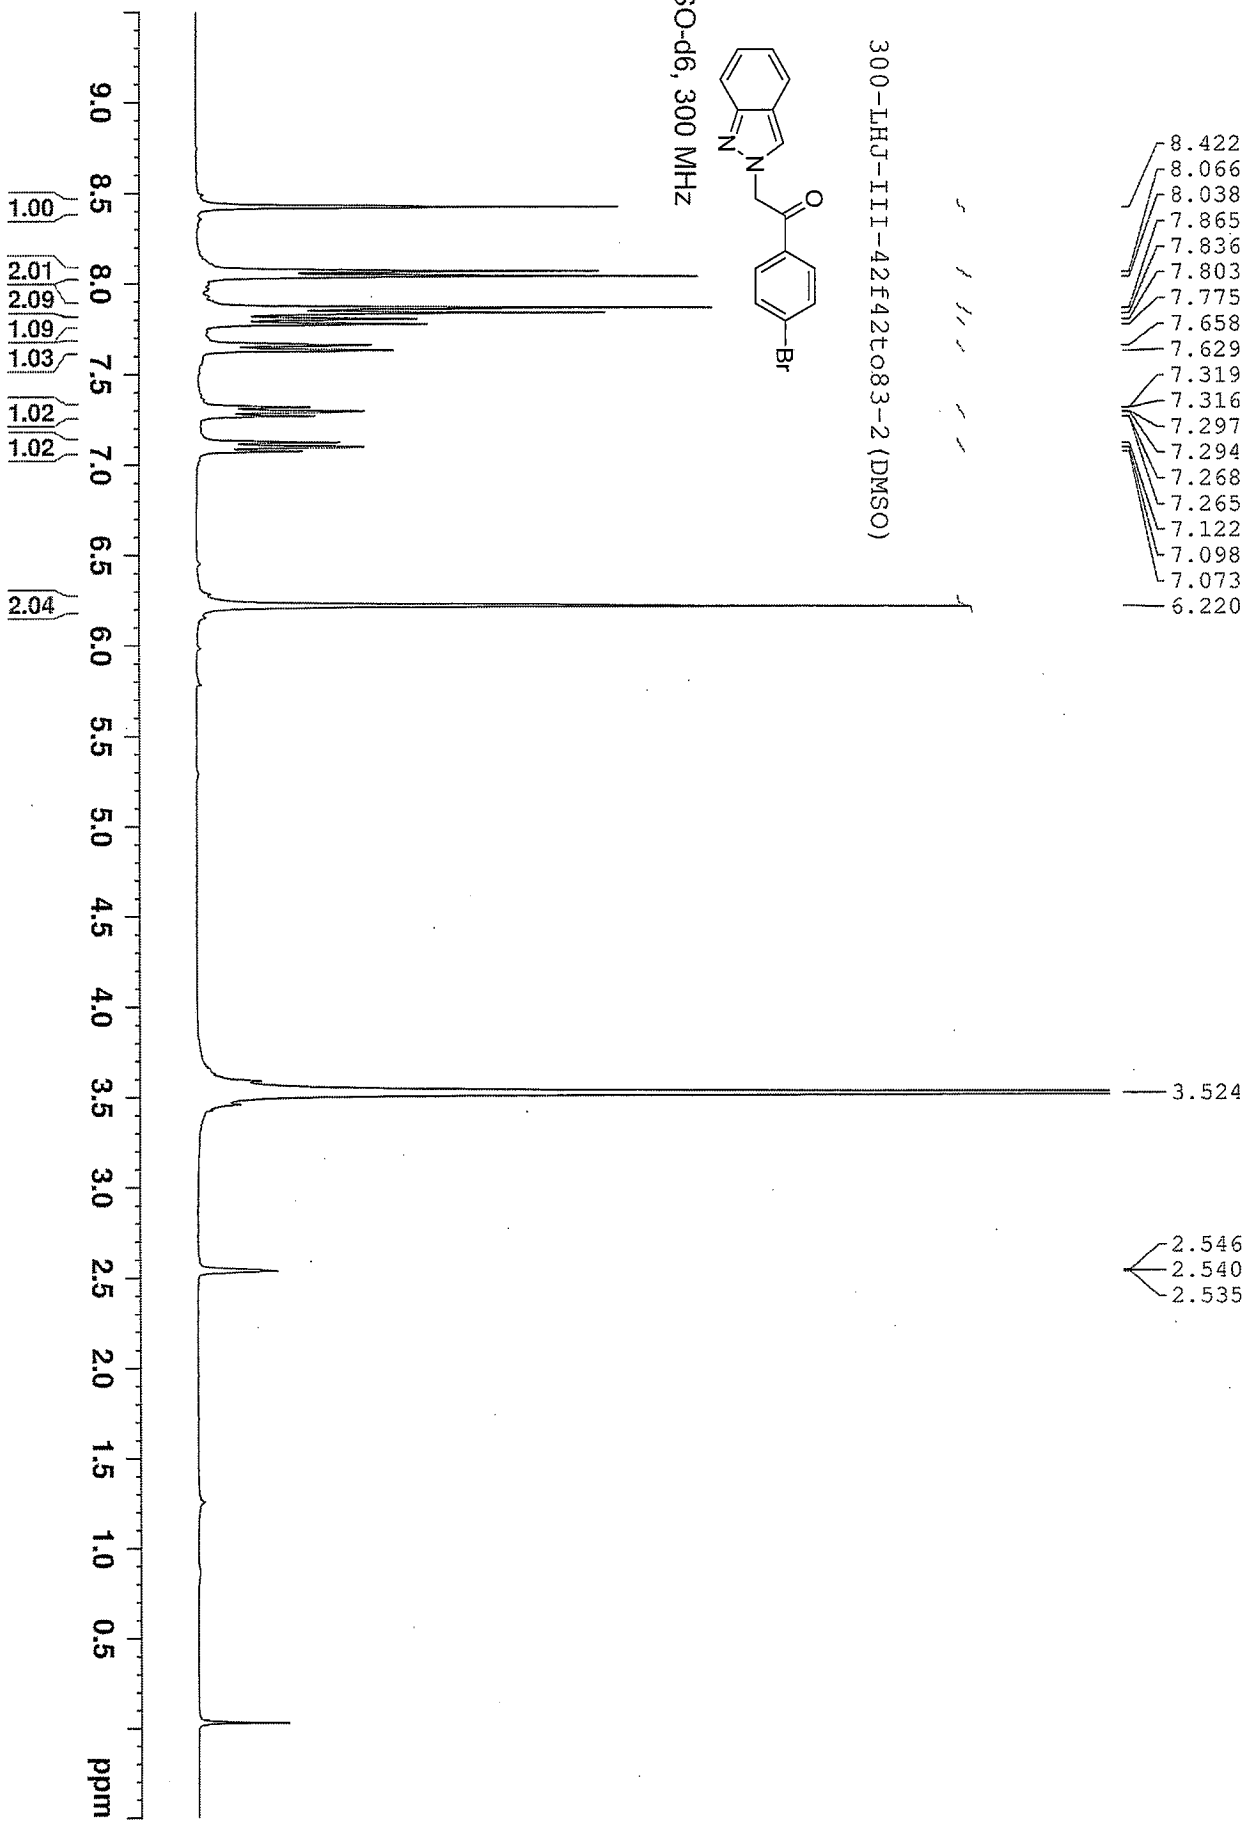

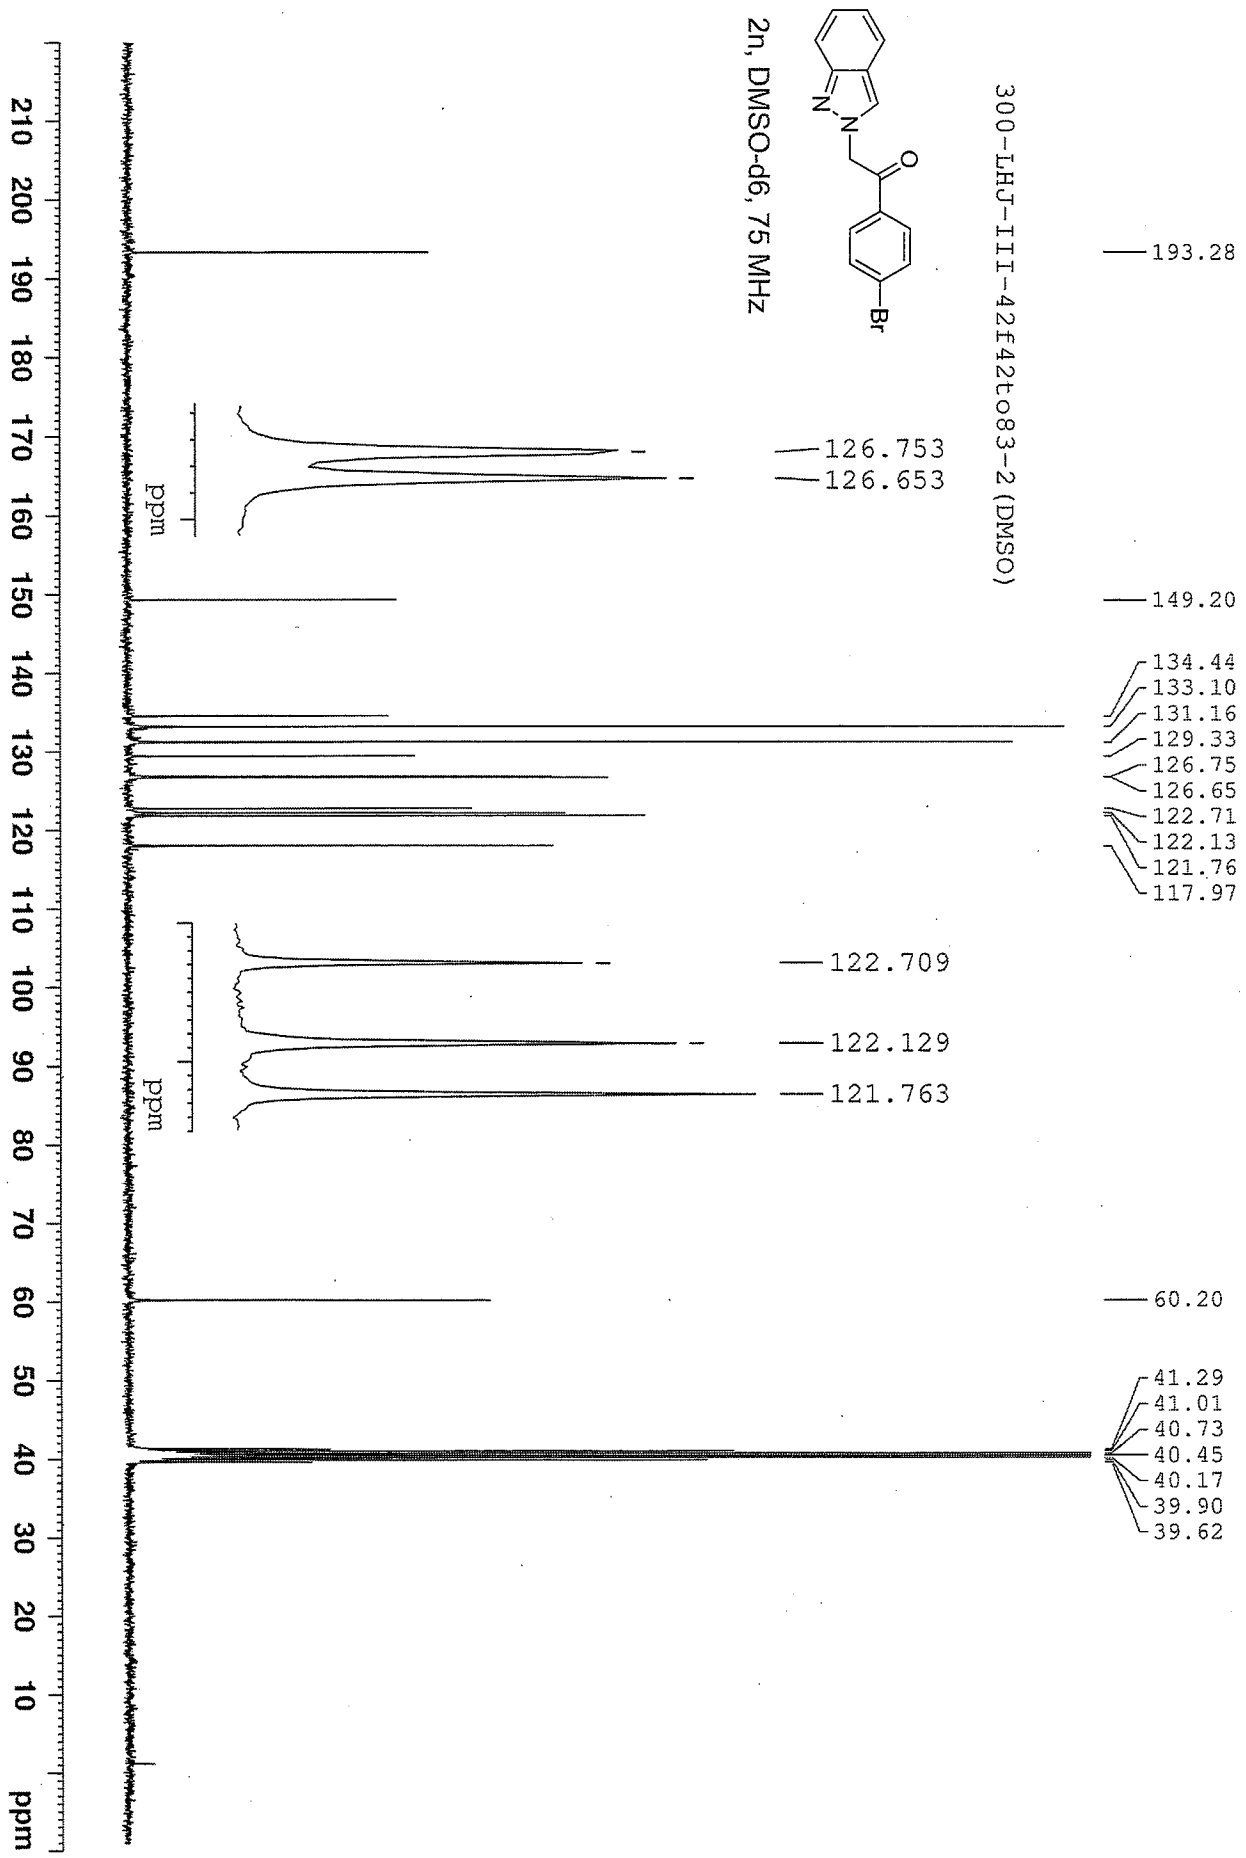

300-LHJ-III-42f42t083-2 (HSQC)

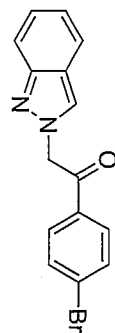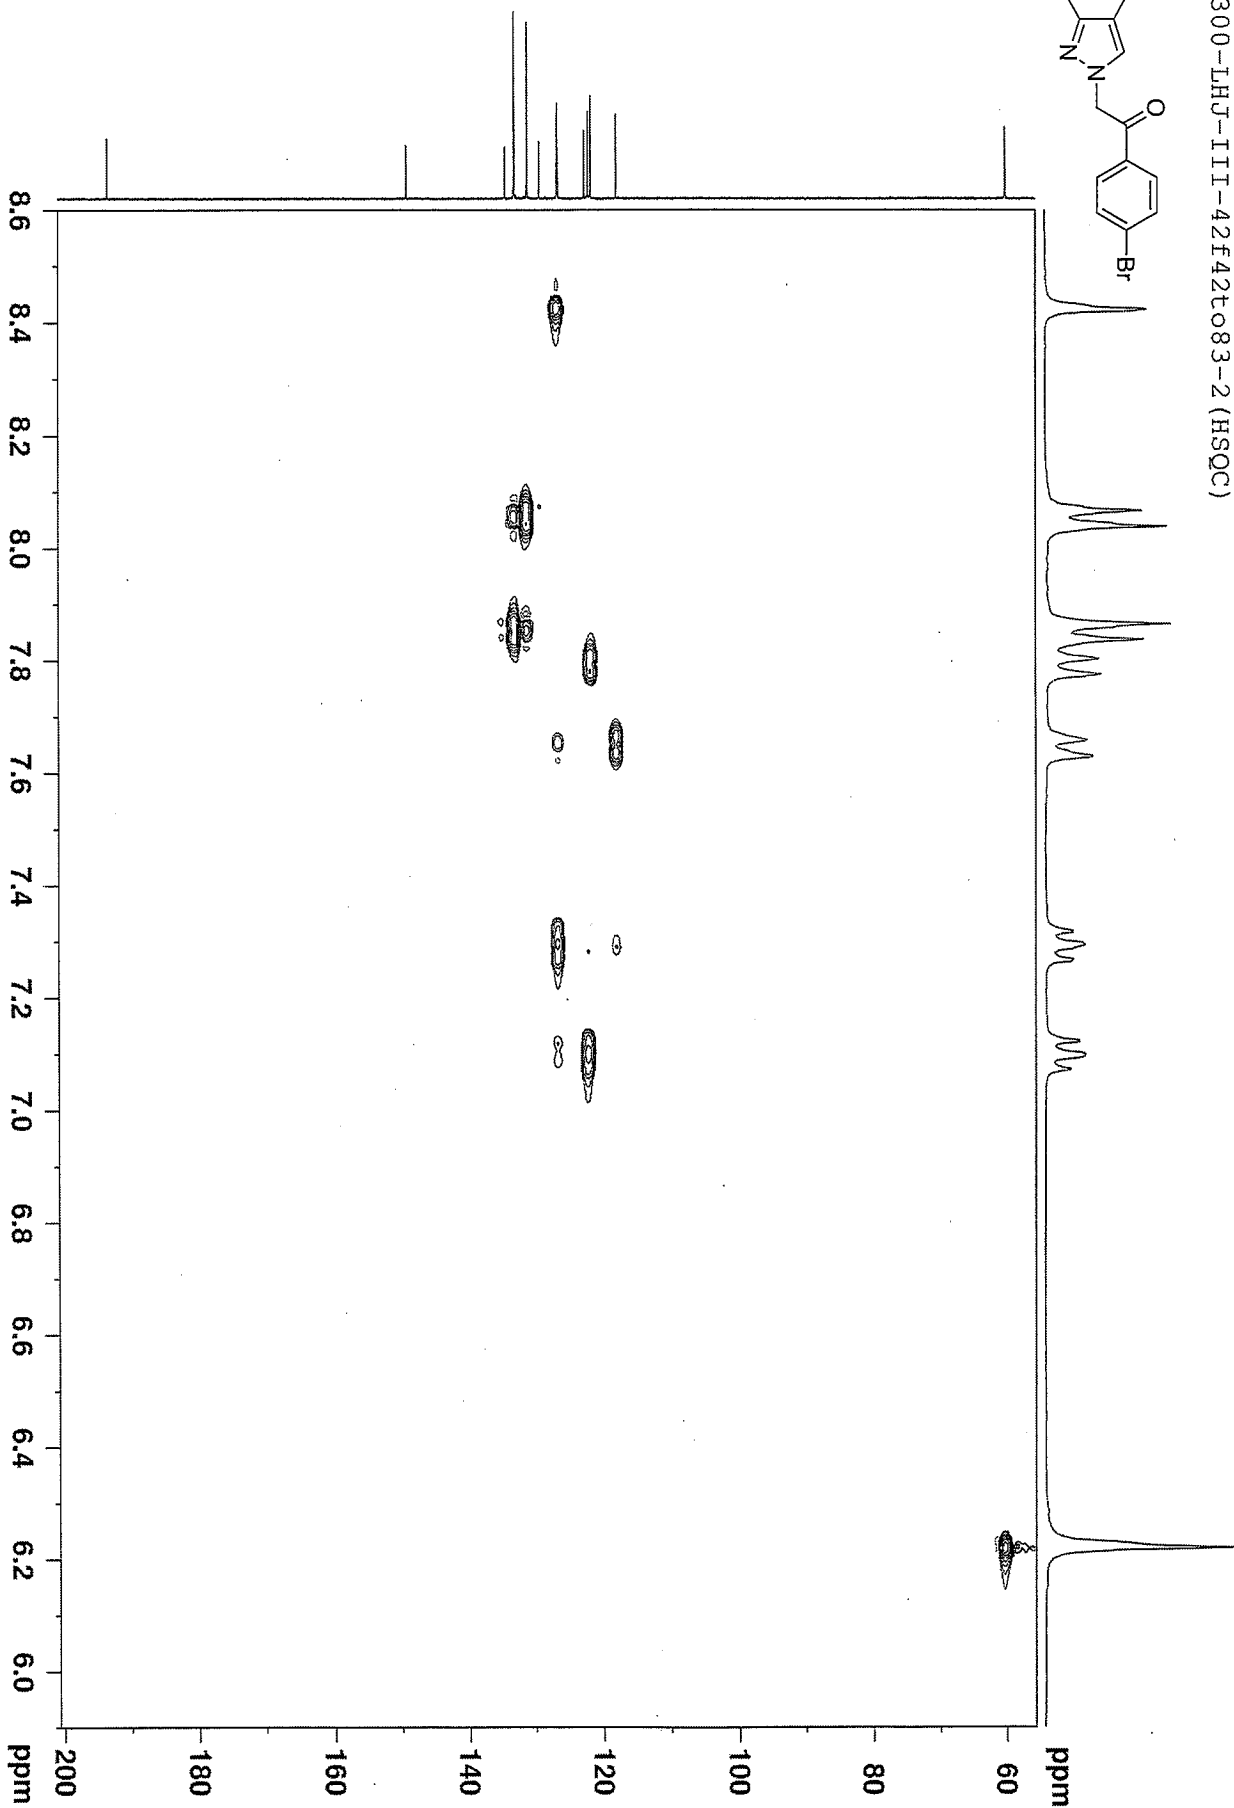

300-LHJ-III-42F42L083-2 (HMBC)

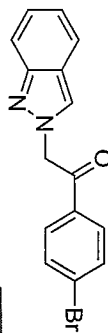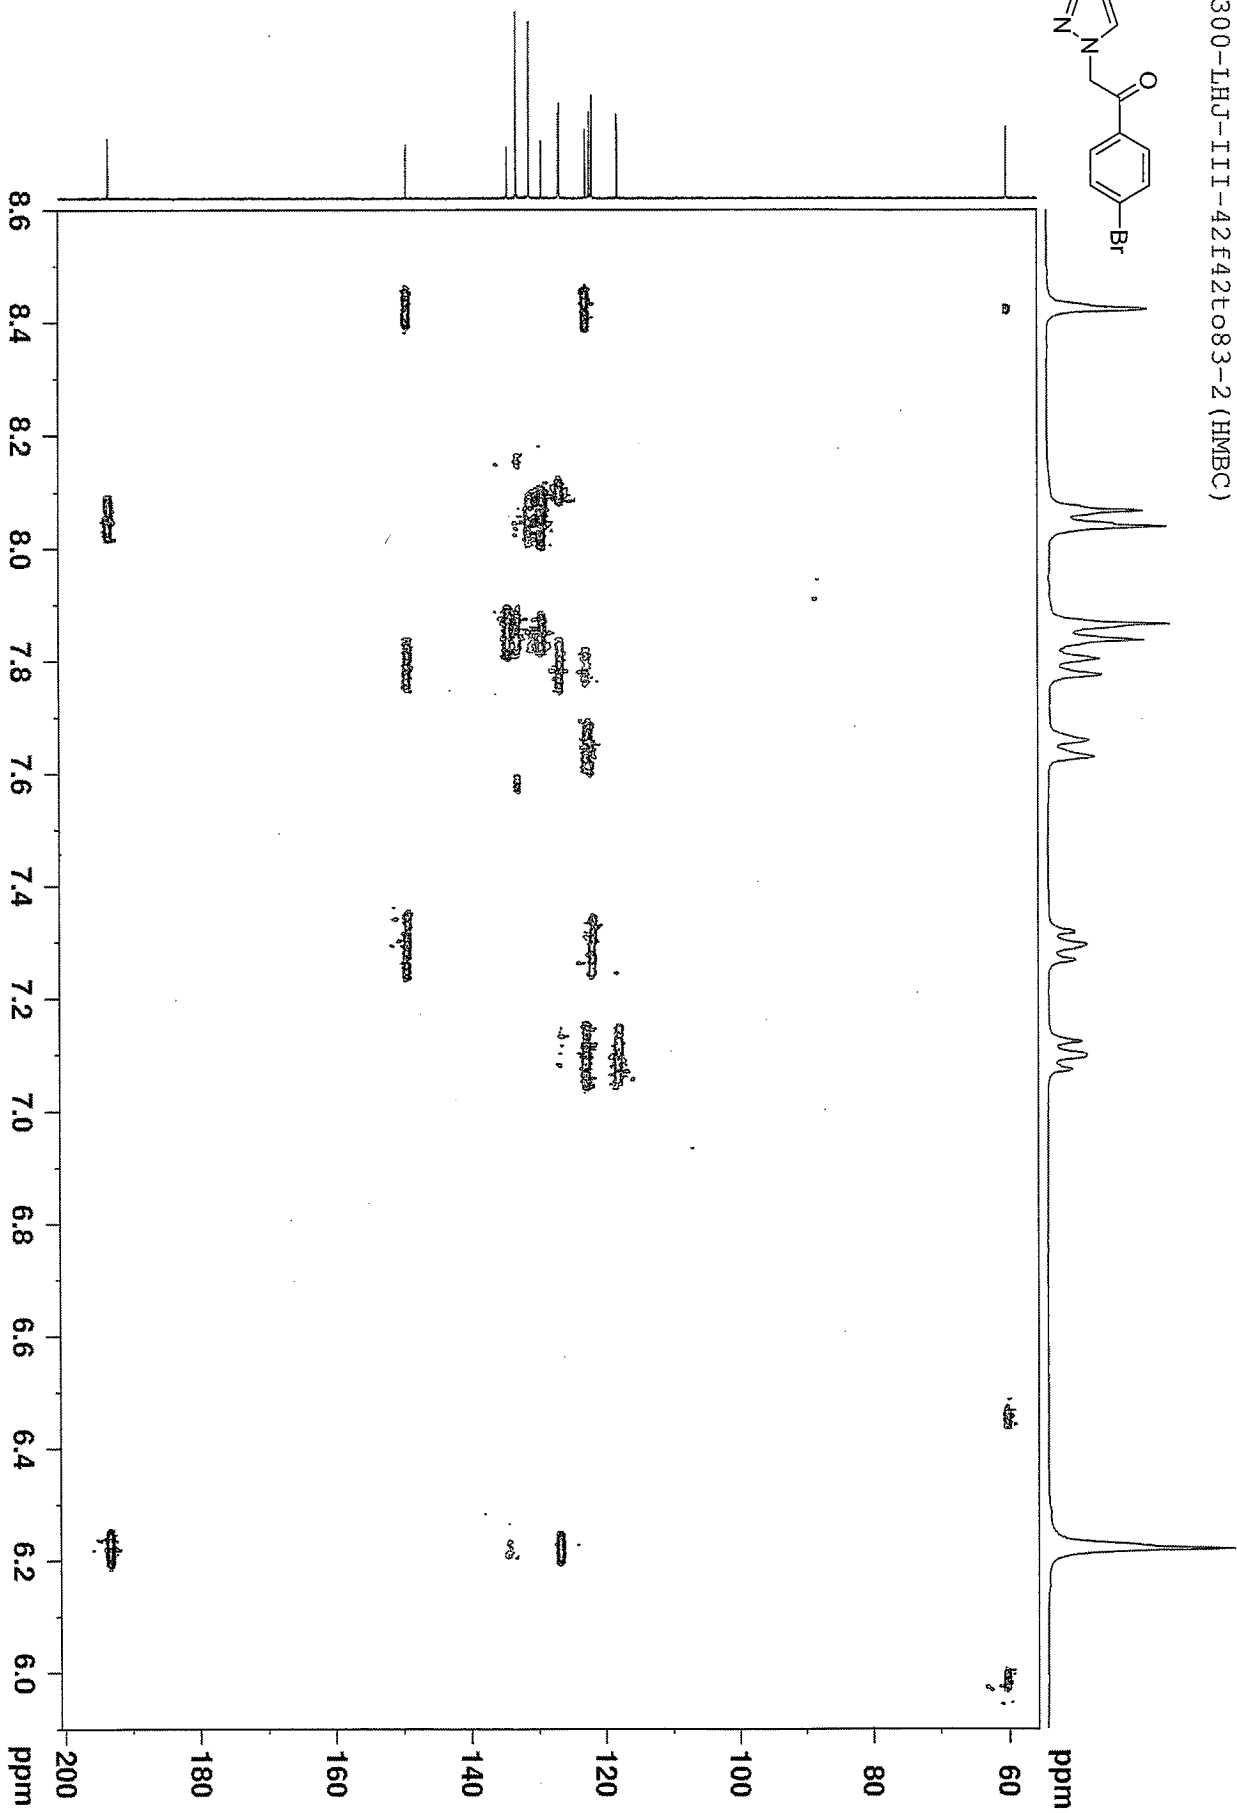

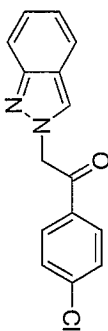

20, DMSO-d6, 300 MHz

300-LHJ-III-35F45to76

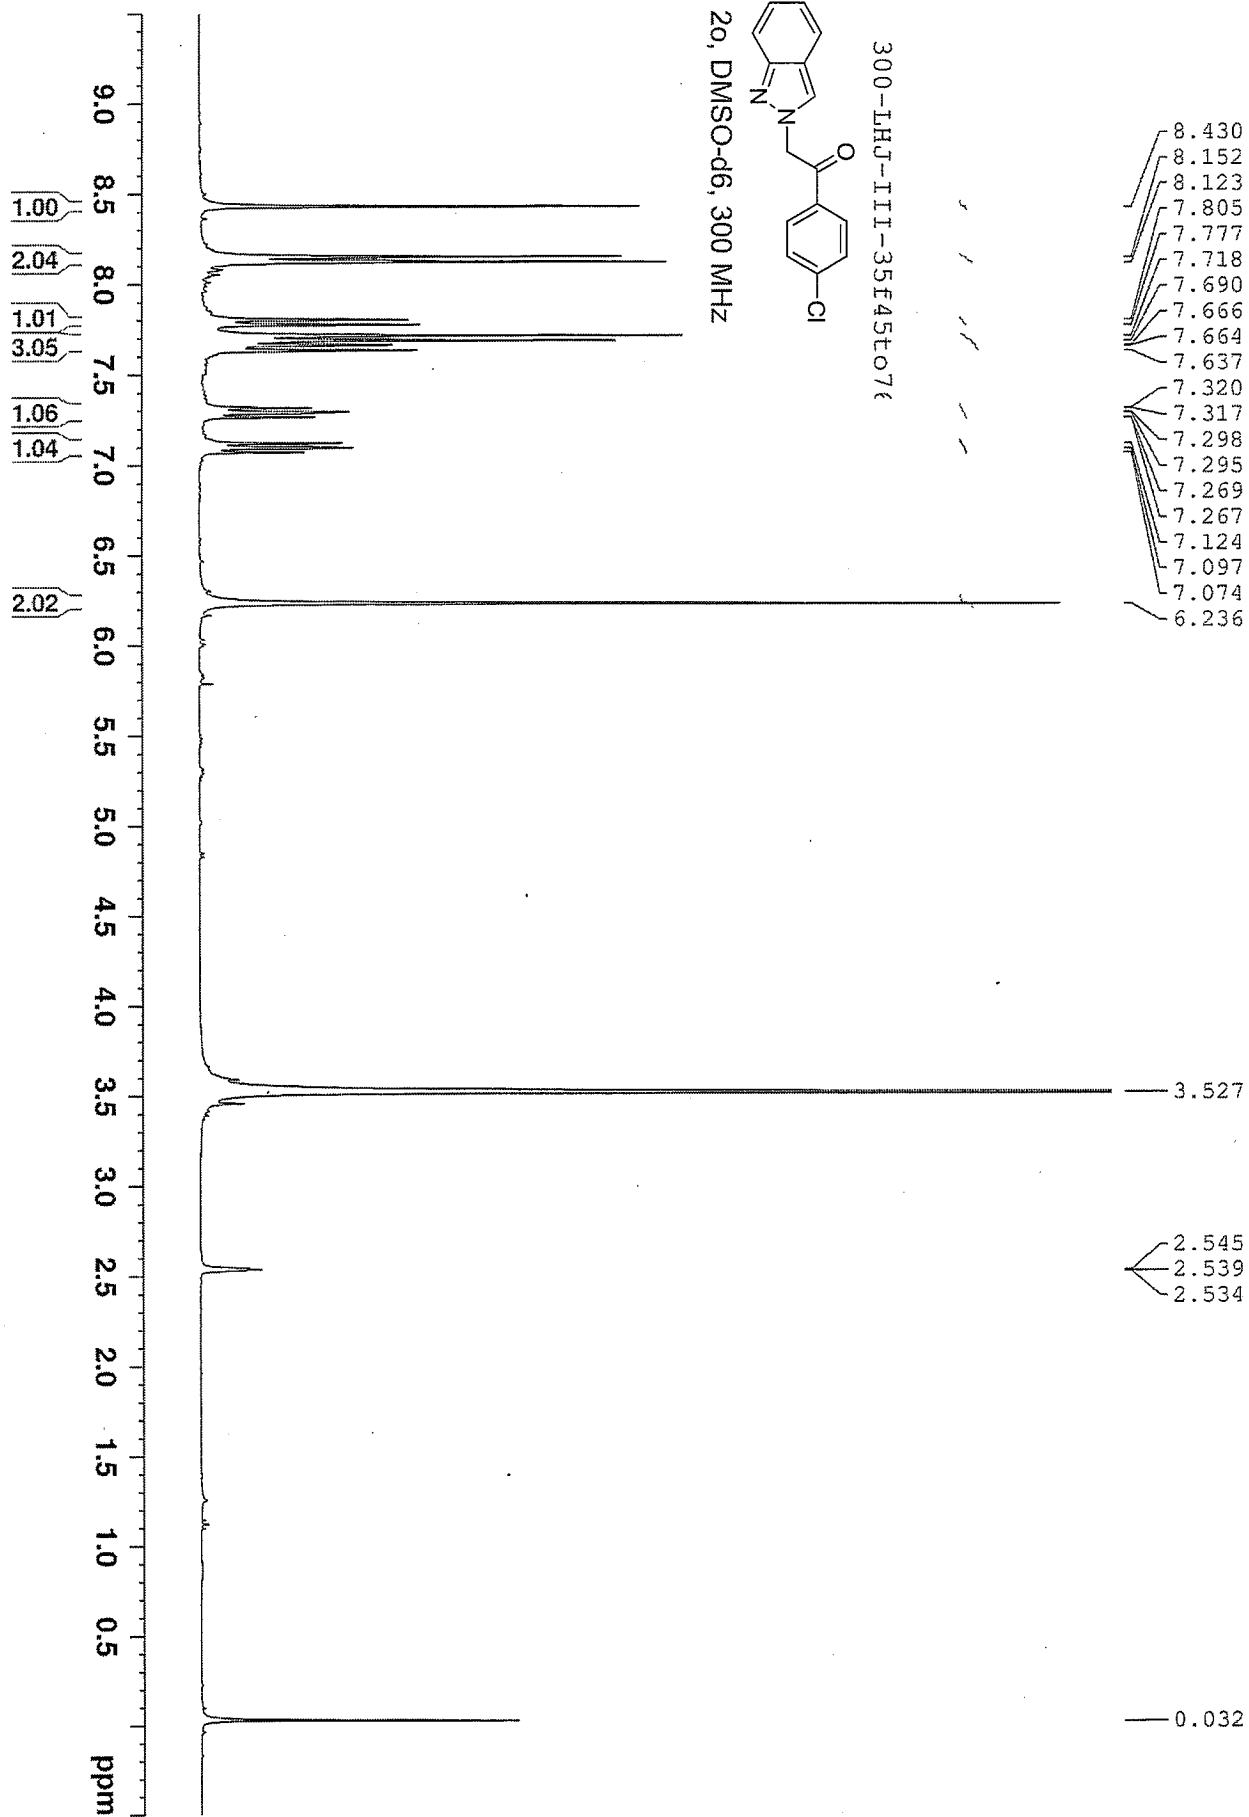

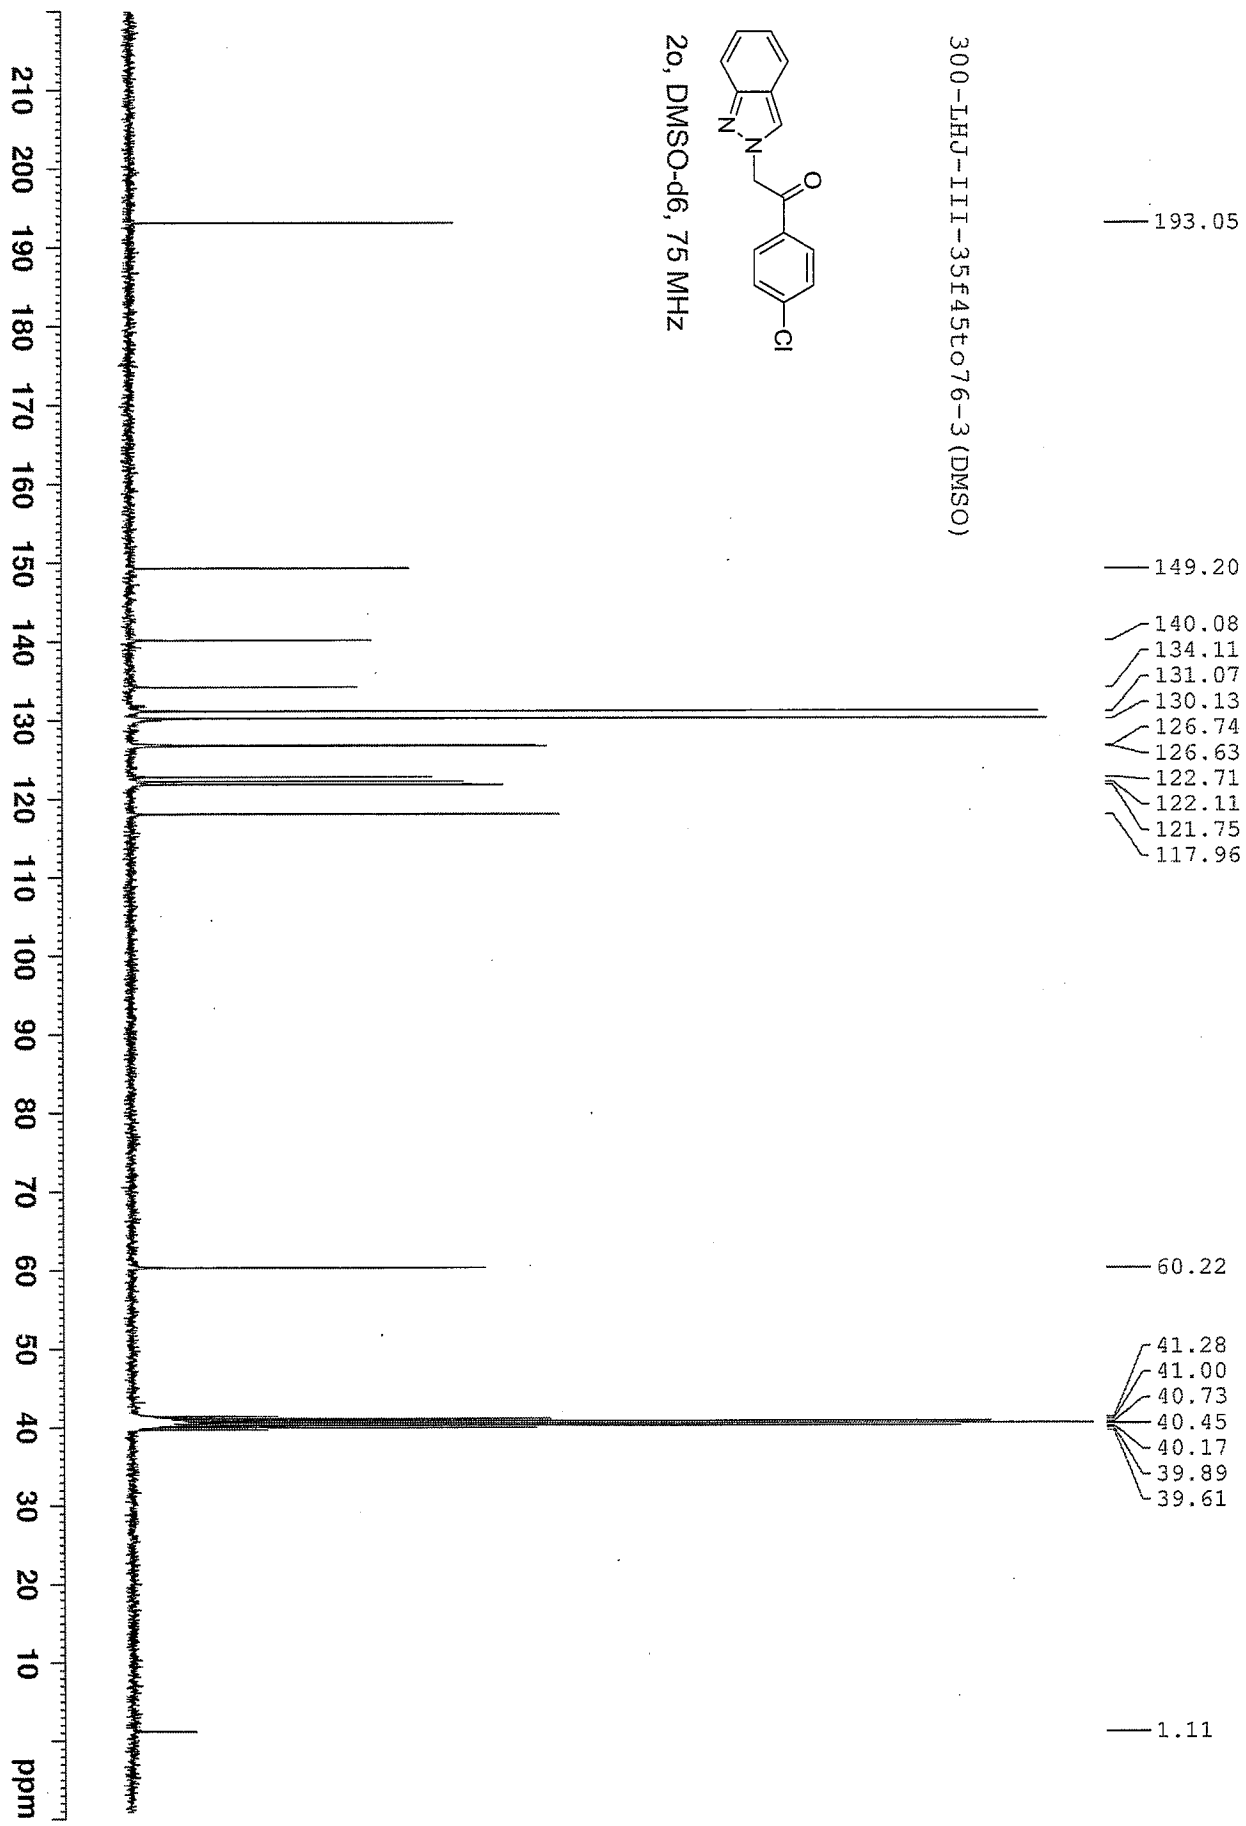

300-LHJ-III-35F45t076-3 (HSQC)

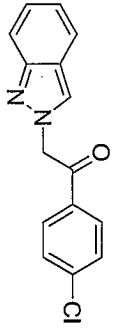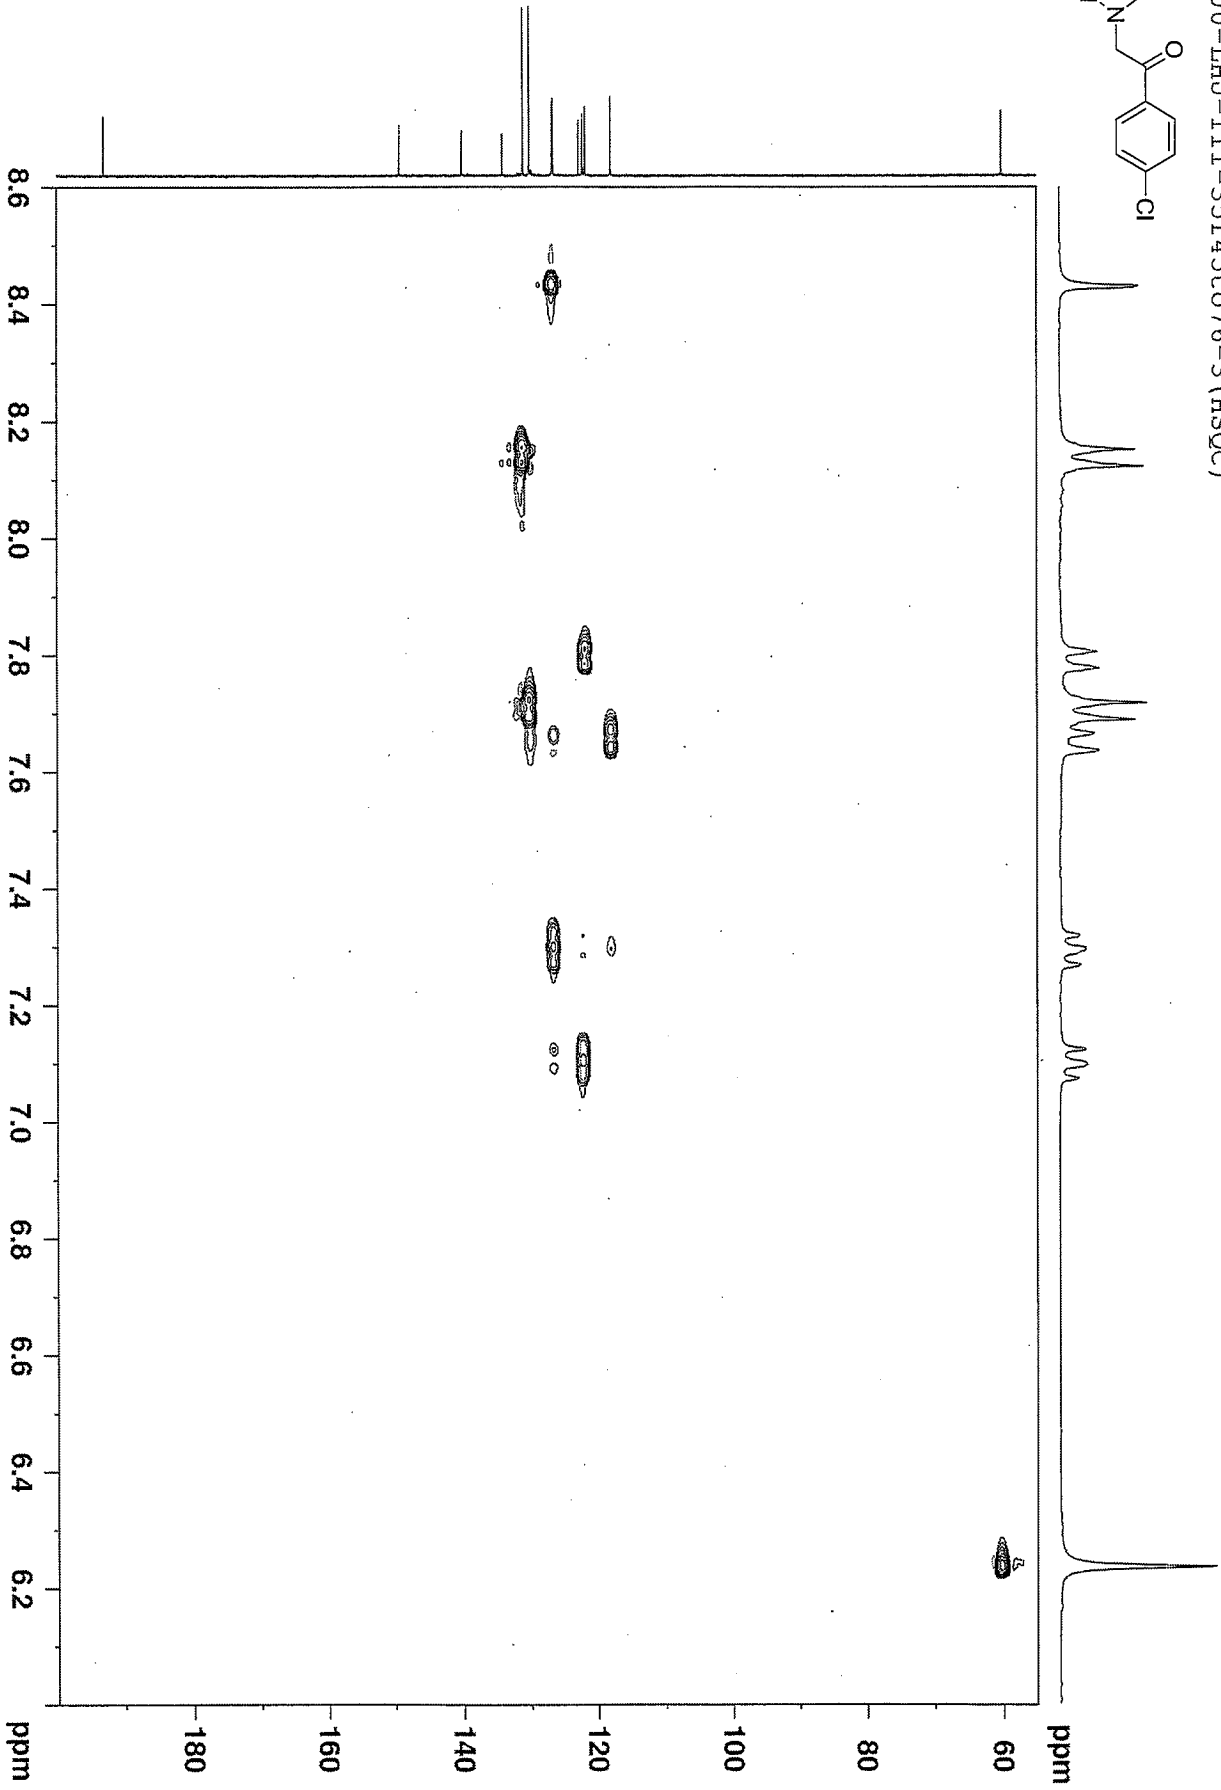

300-LHU-III-35F45t076-3 (HMBC)

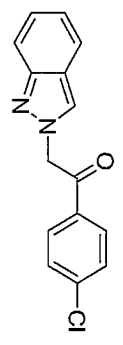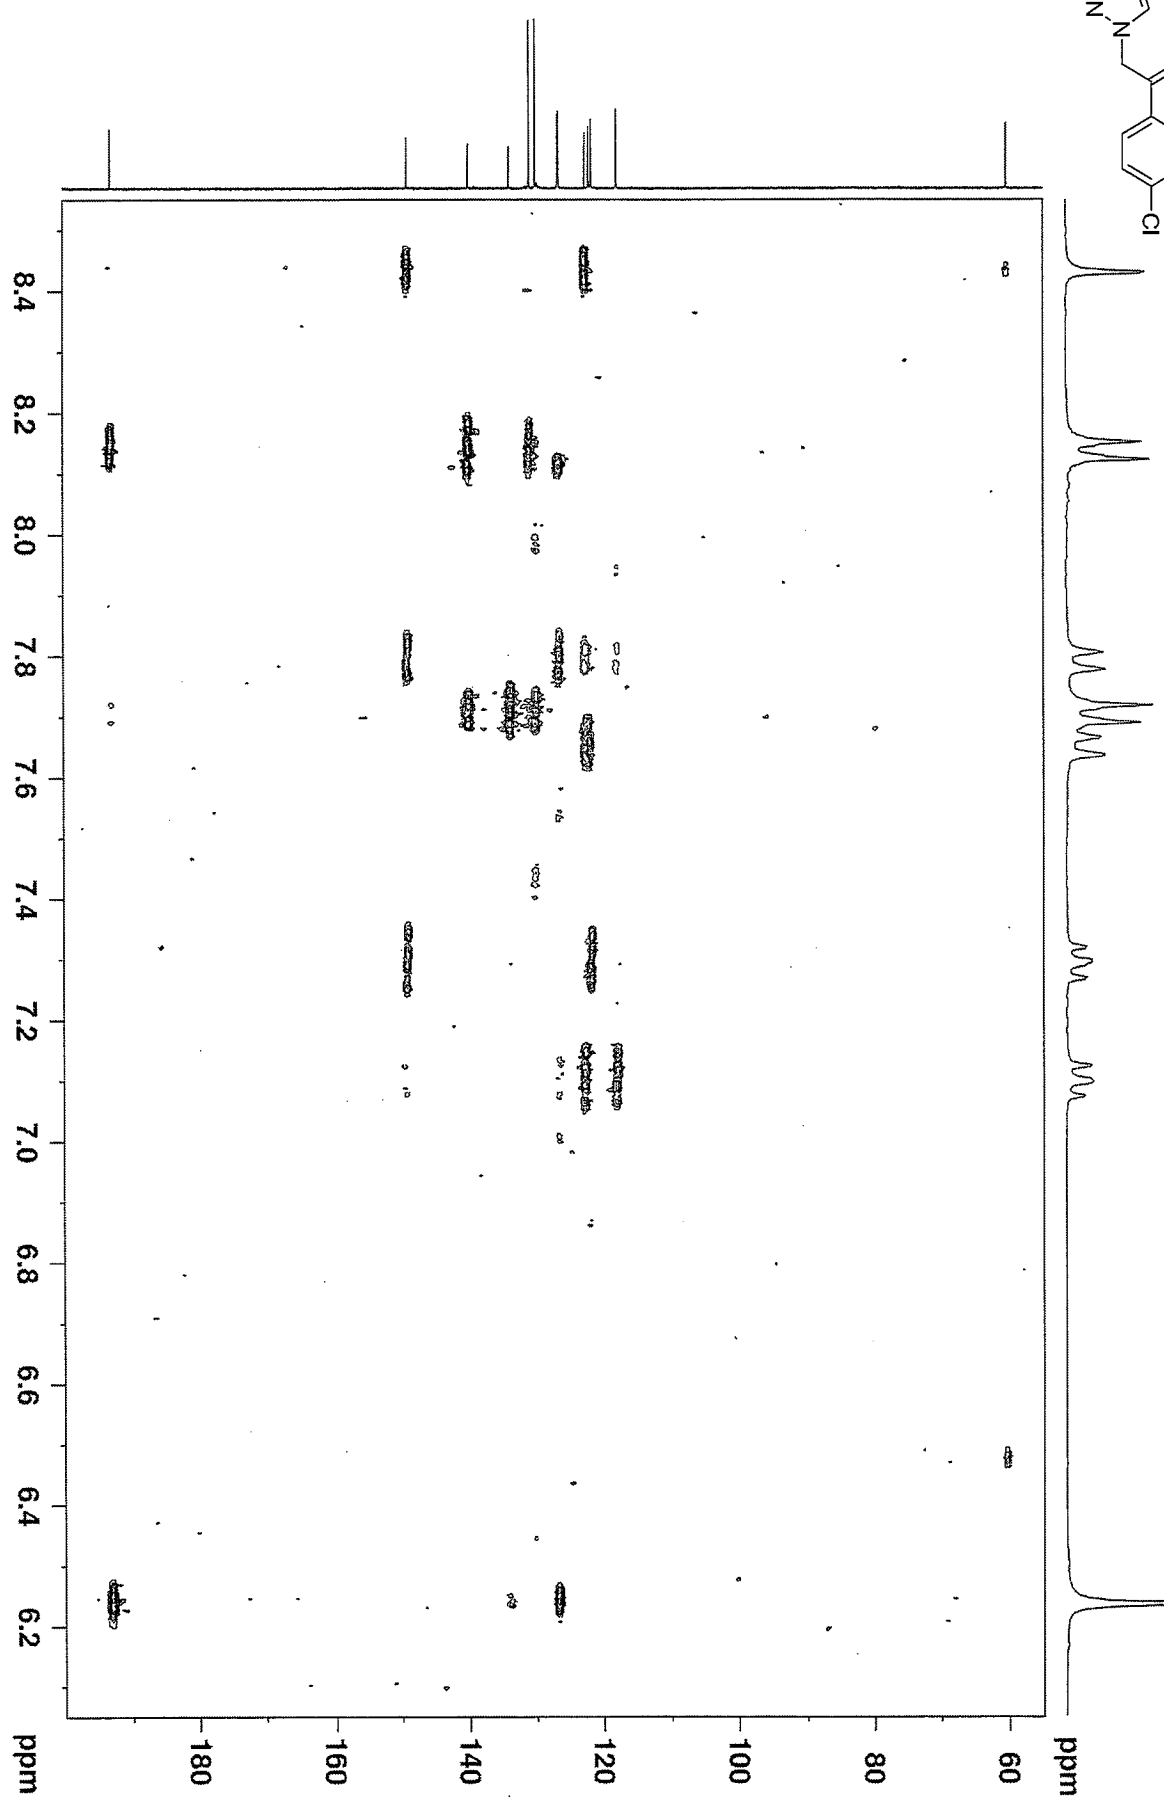



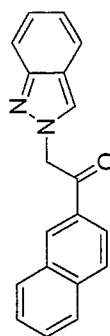

300-LHJ-III-56F45t063-3 (DMSO)

2p, DMSO-d6, 300 MHz

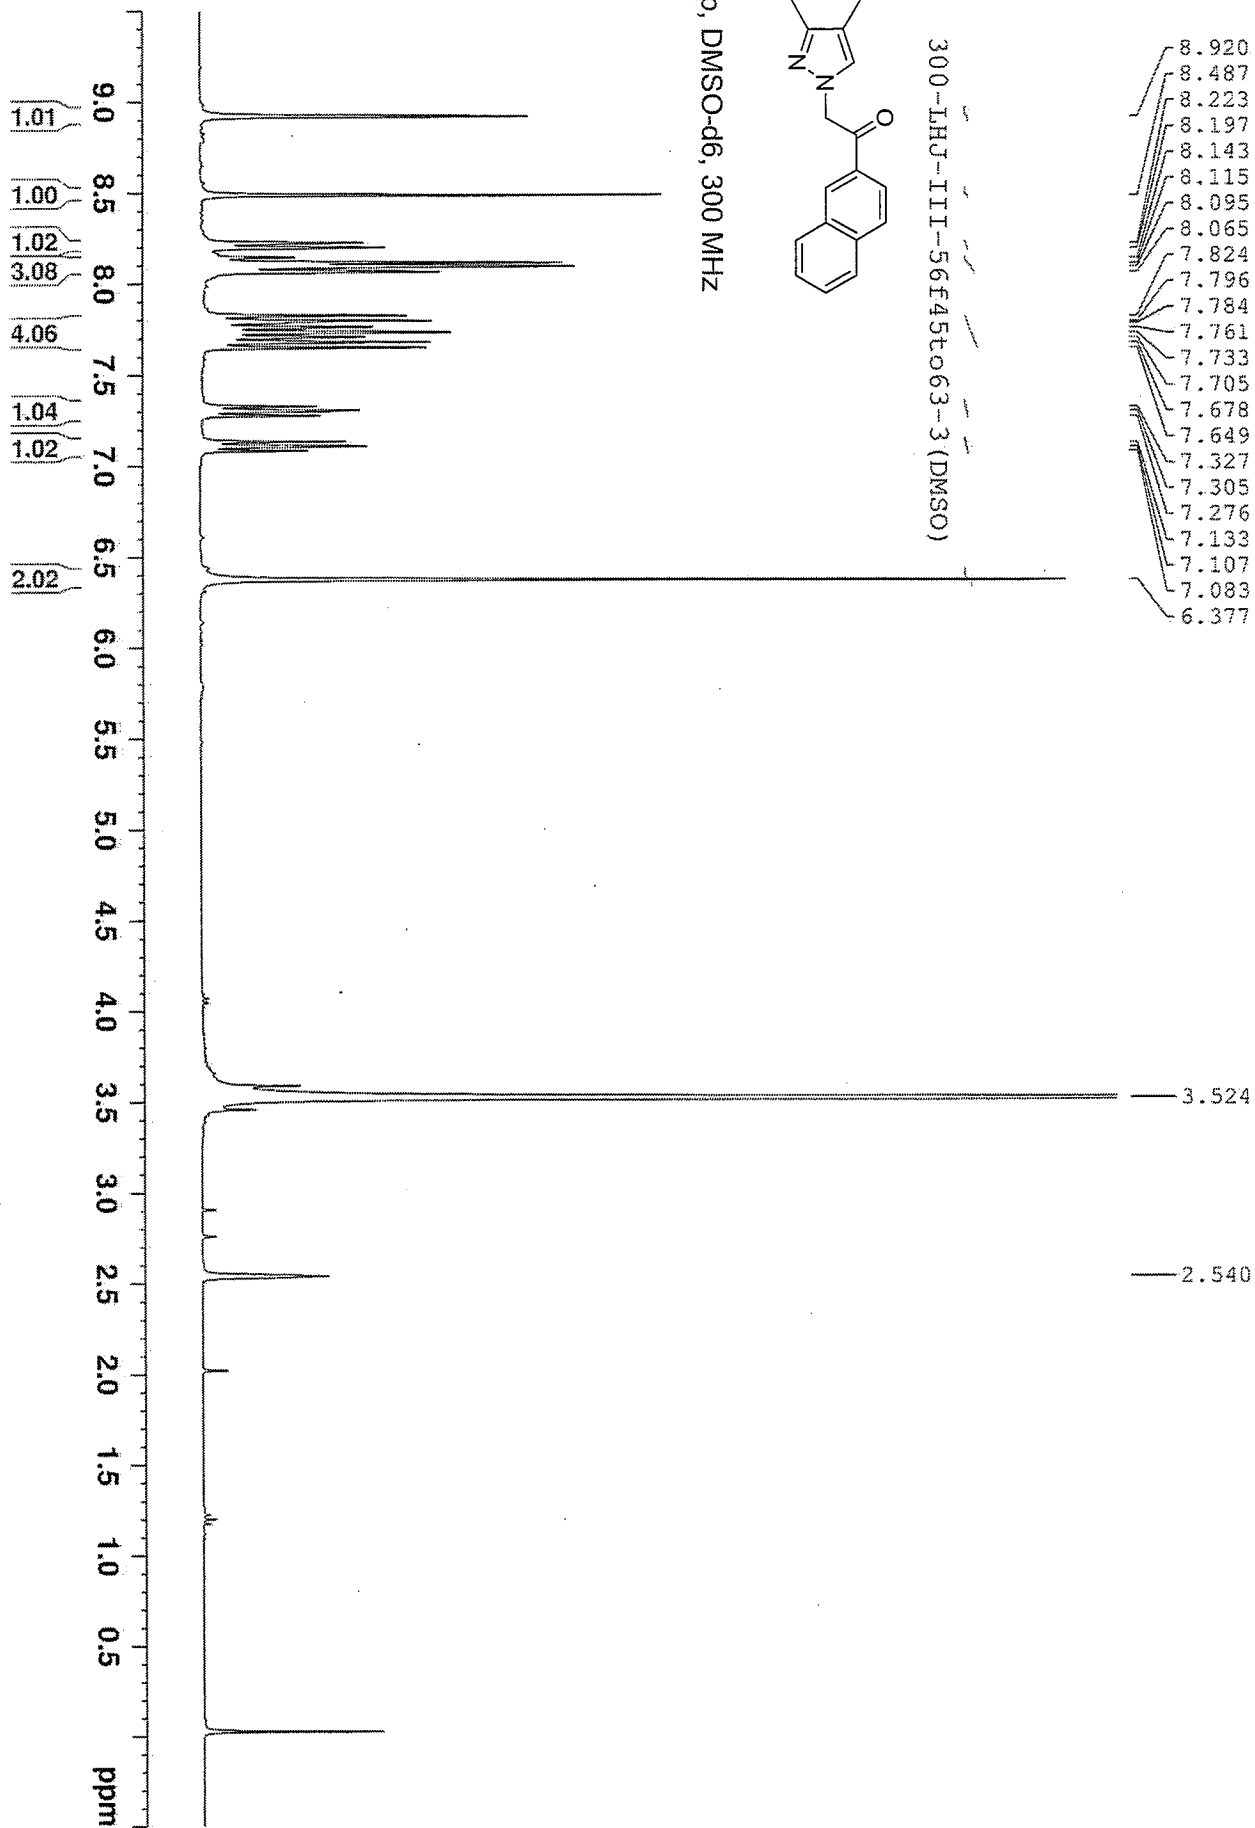

2p, DMSO-d6, 75 MHz

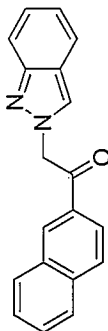

300-LHJ-TII-56F45t063-3 (DMSO)

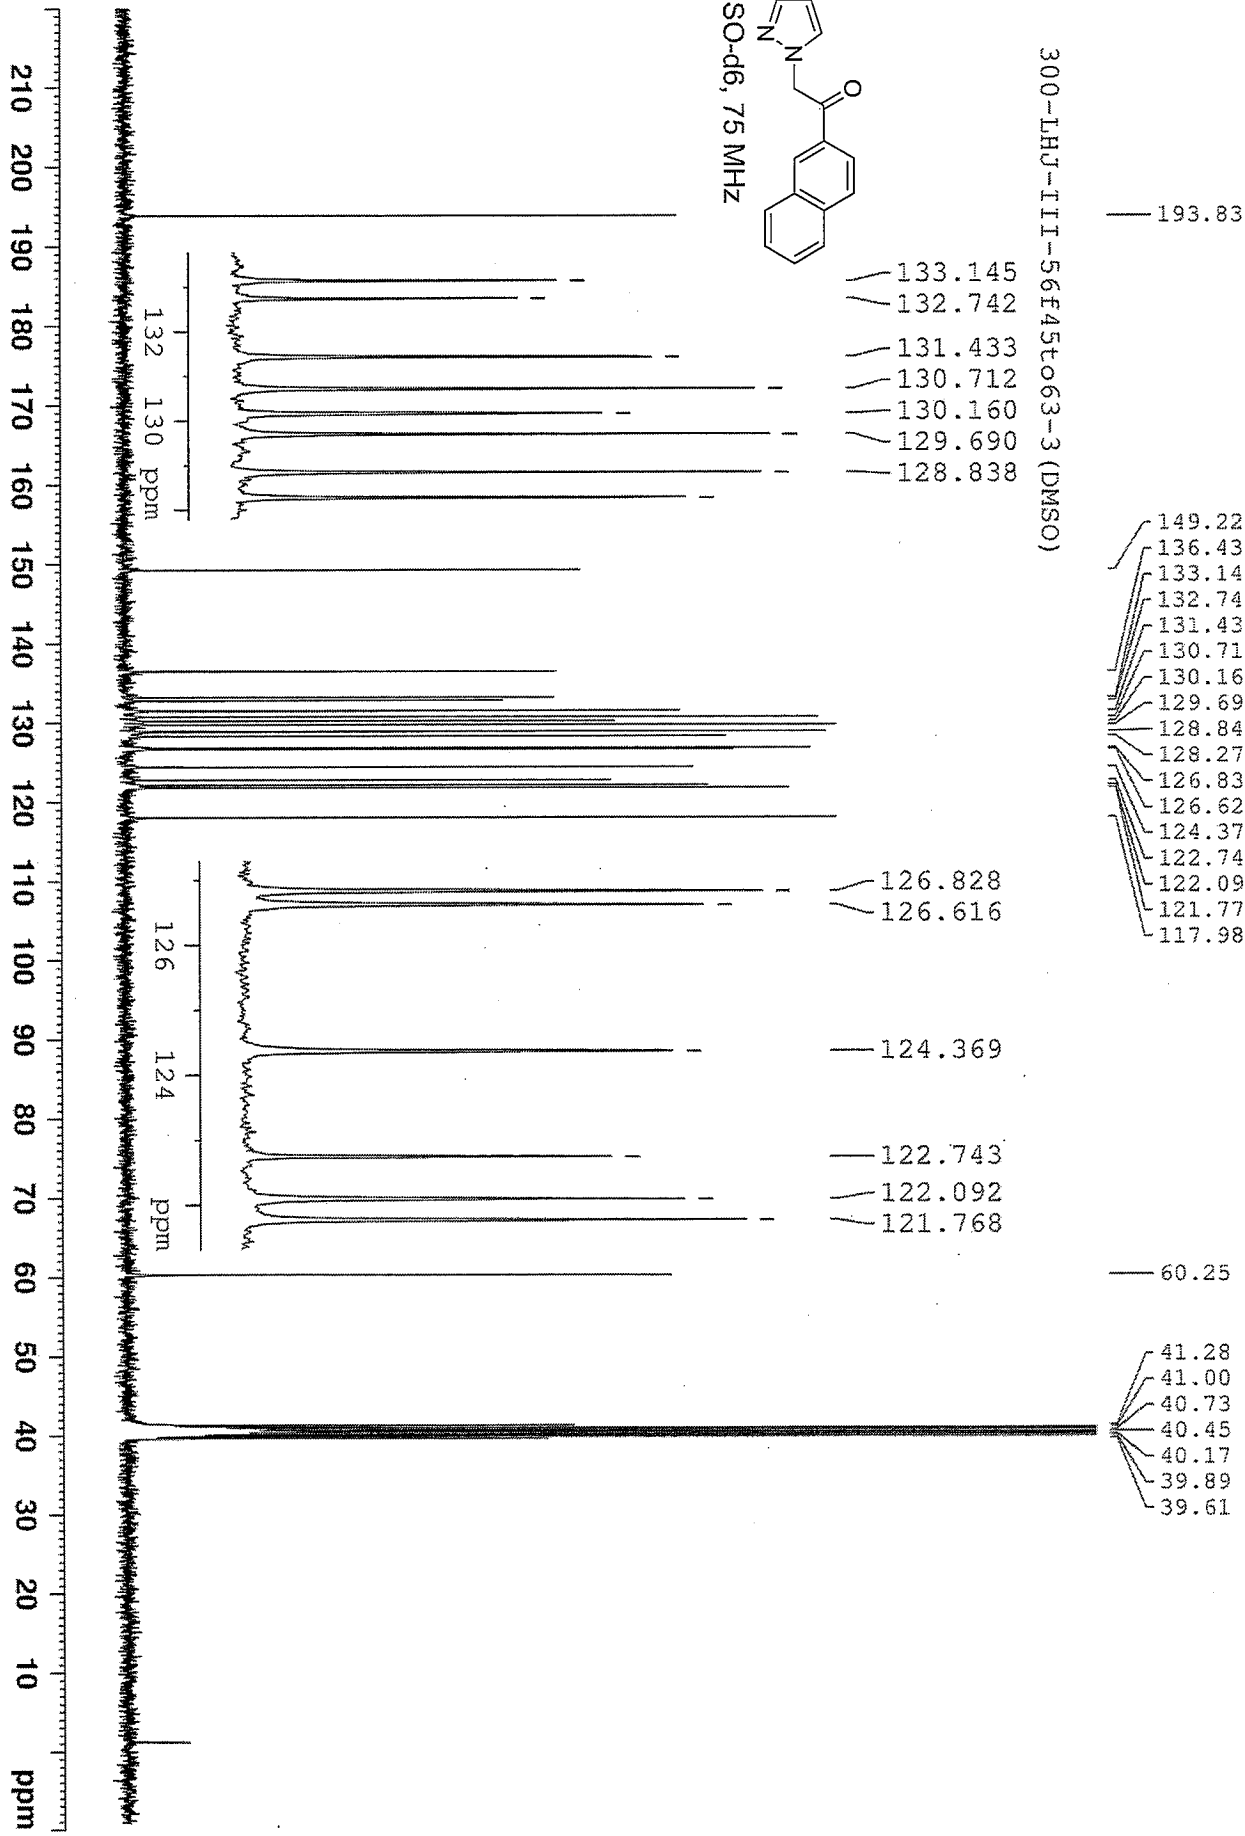

300-LHJ-III-56F45t063-3 (HSQC)

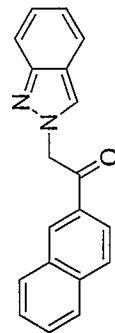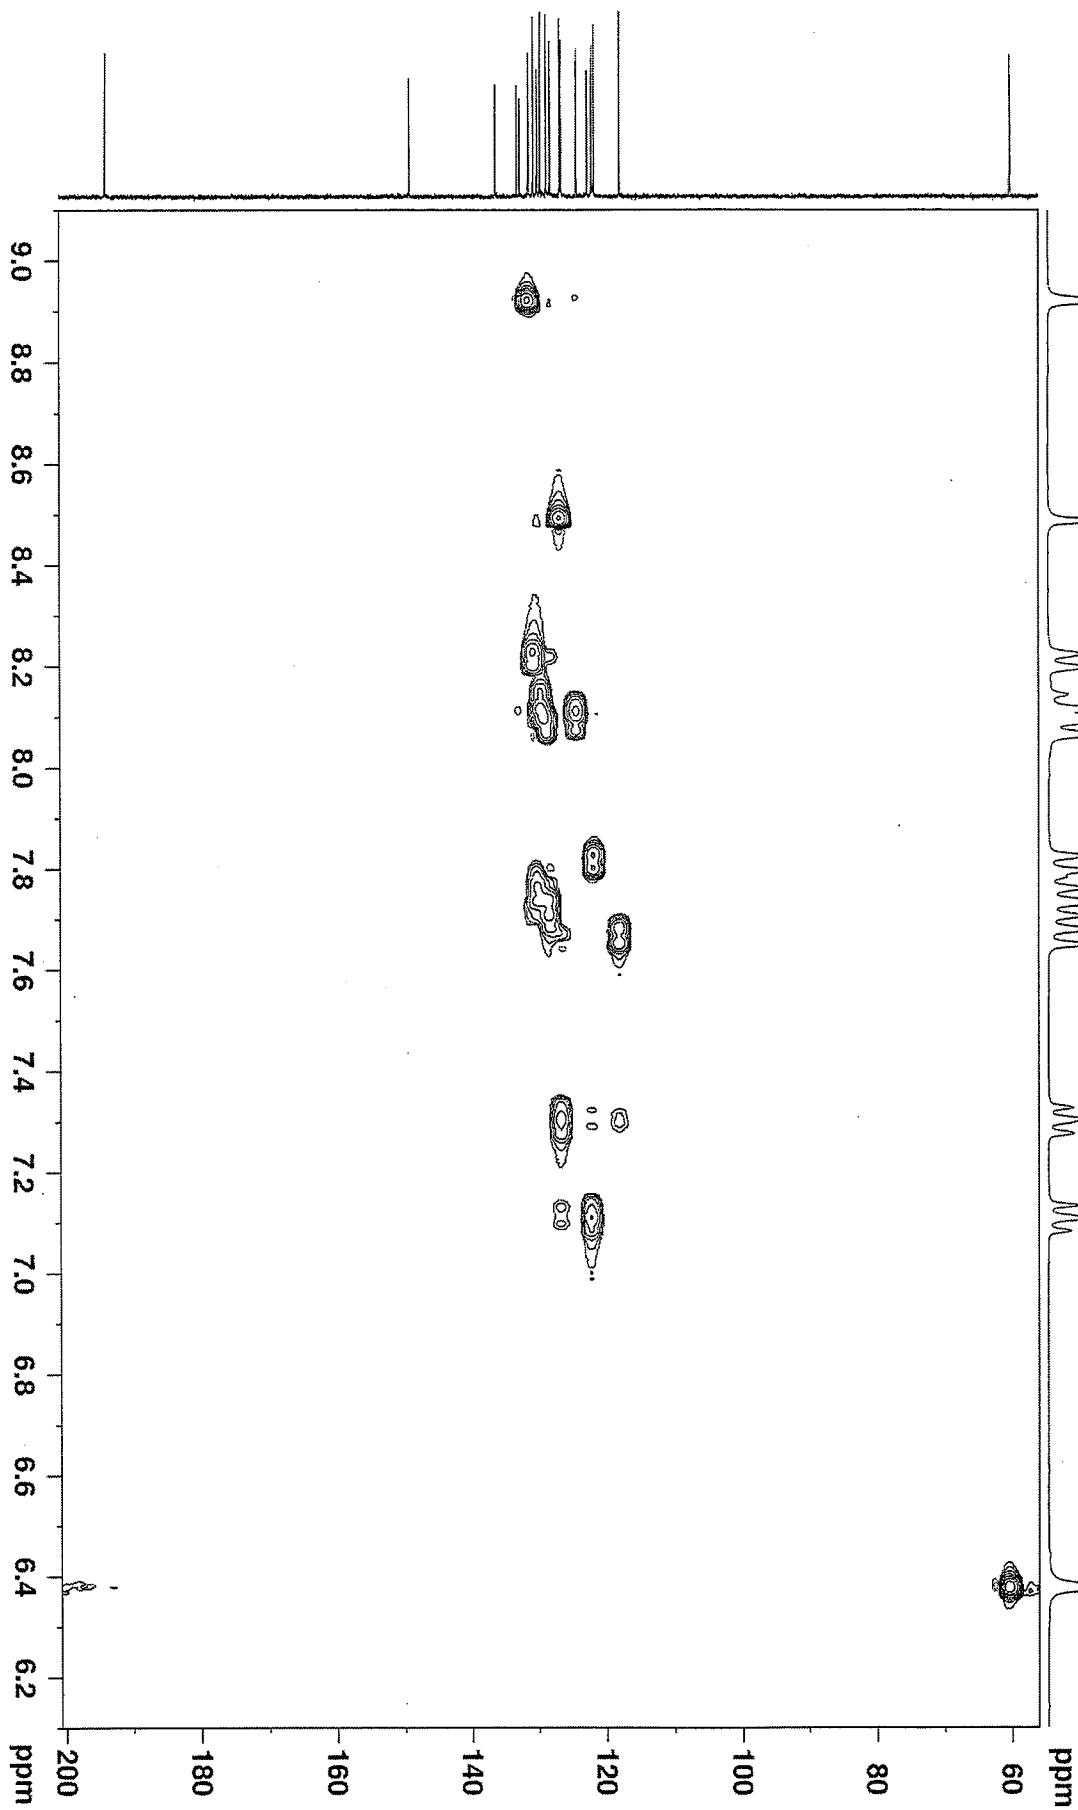

300-LHJ-II-56F45t063-3 (HMBC)

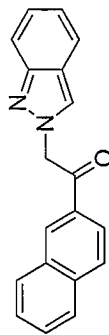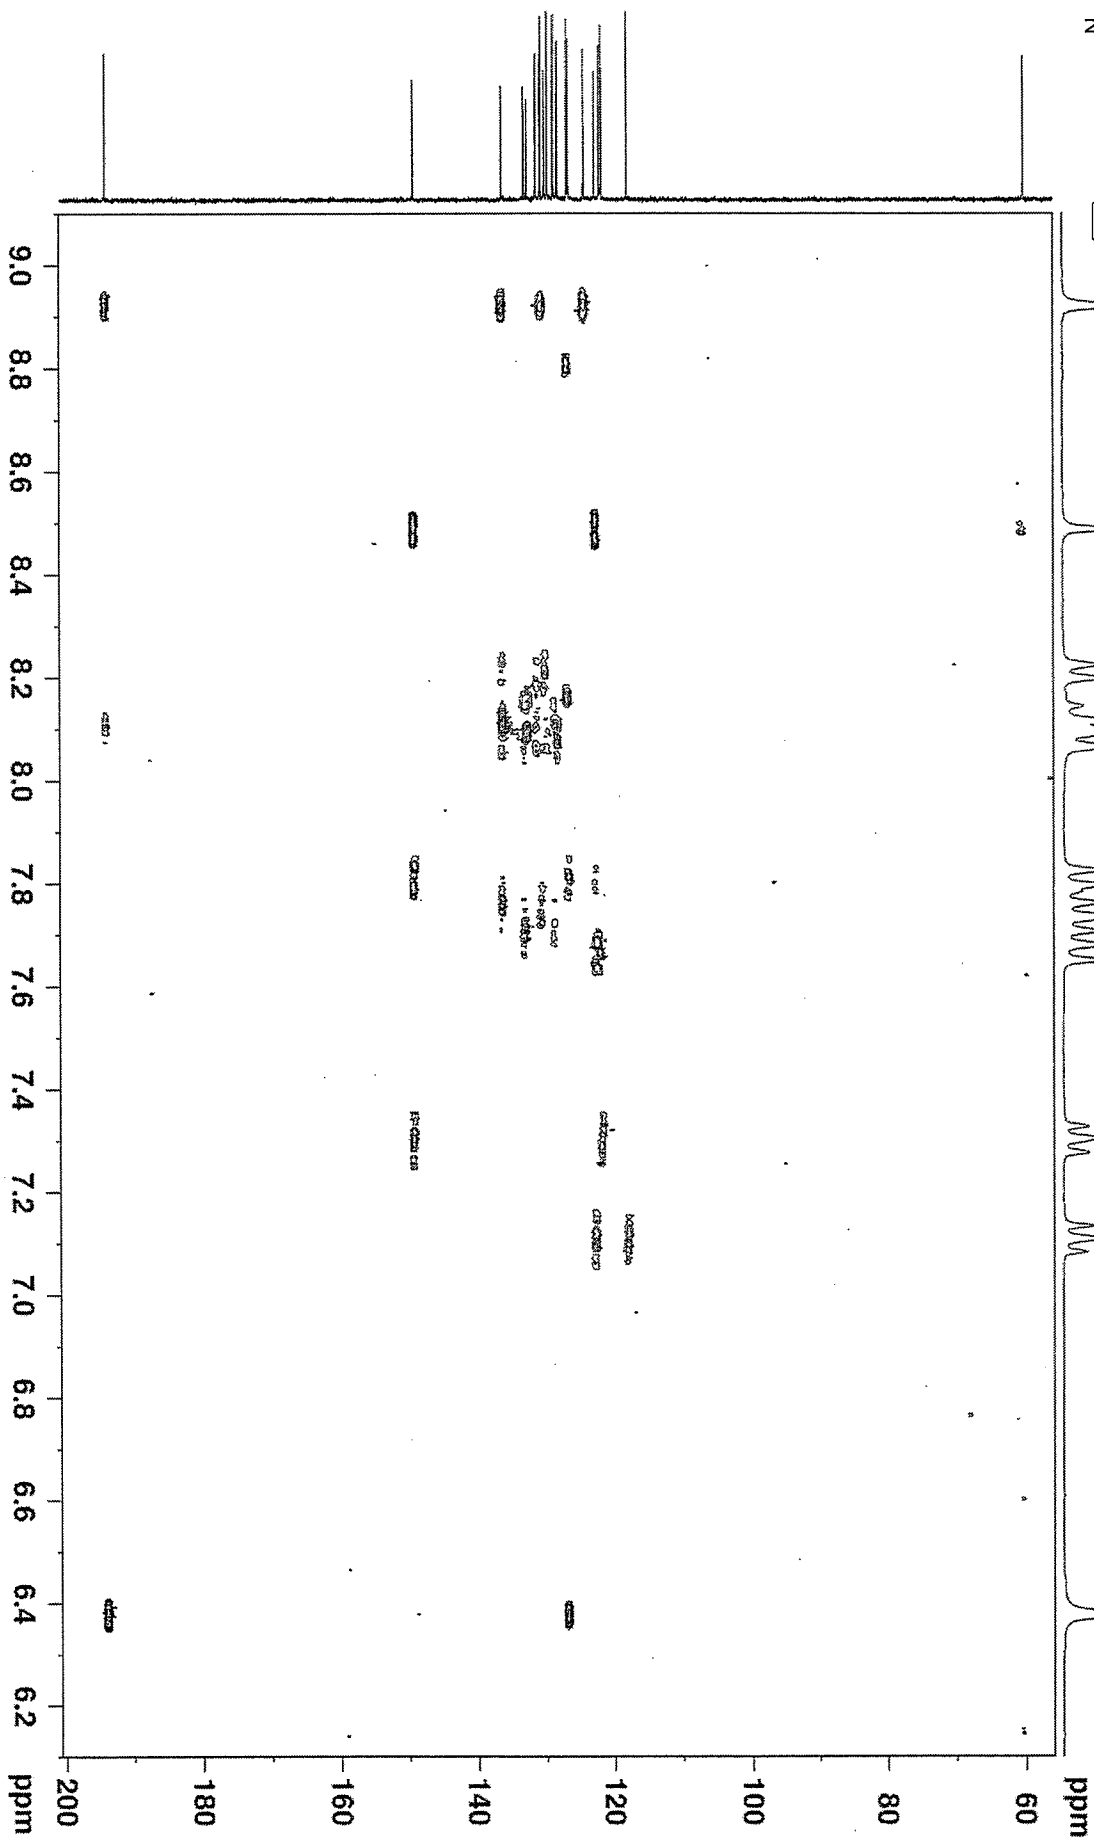

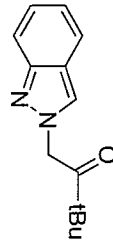

2q, CDCl<sub>3</sub>, 300 MHz

300-LHJ-III-54F23t044-1

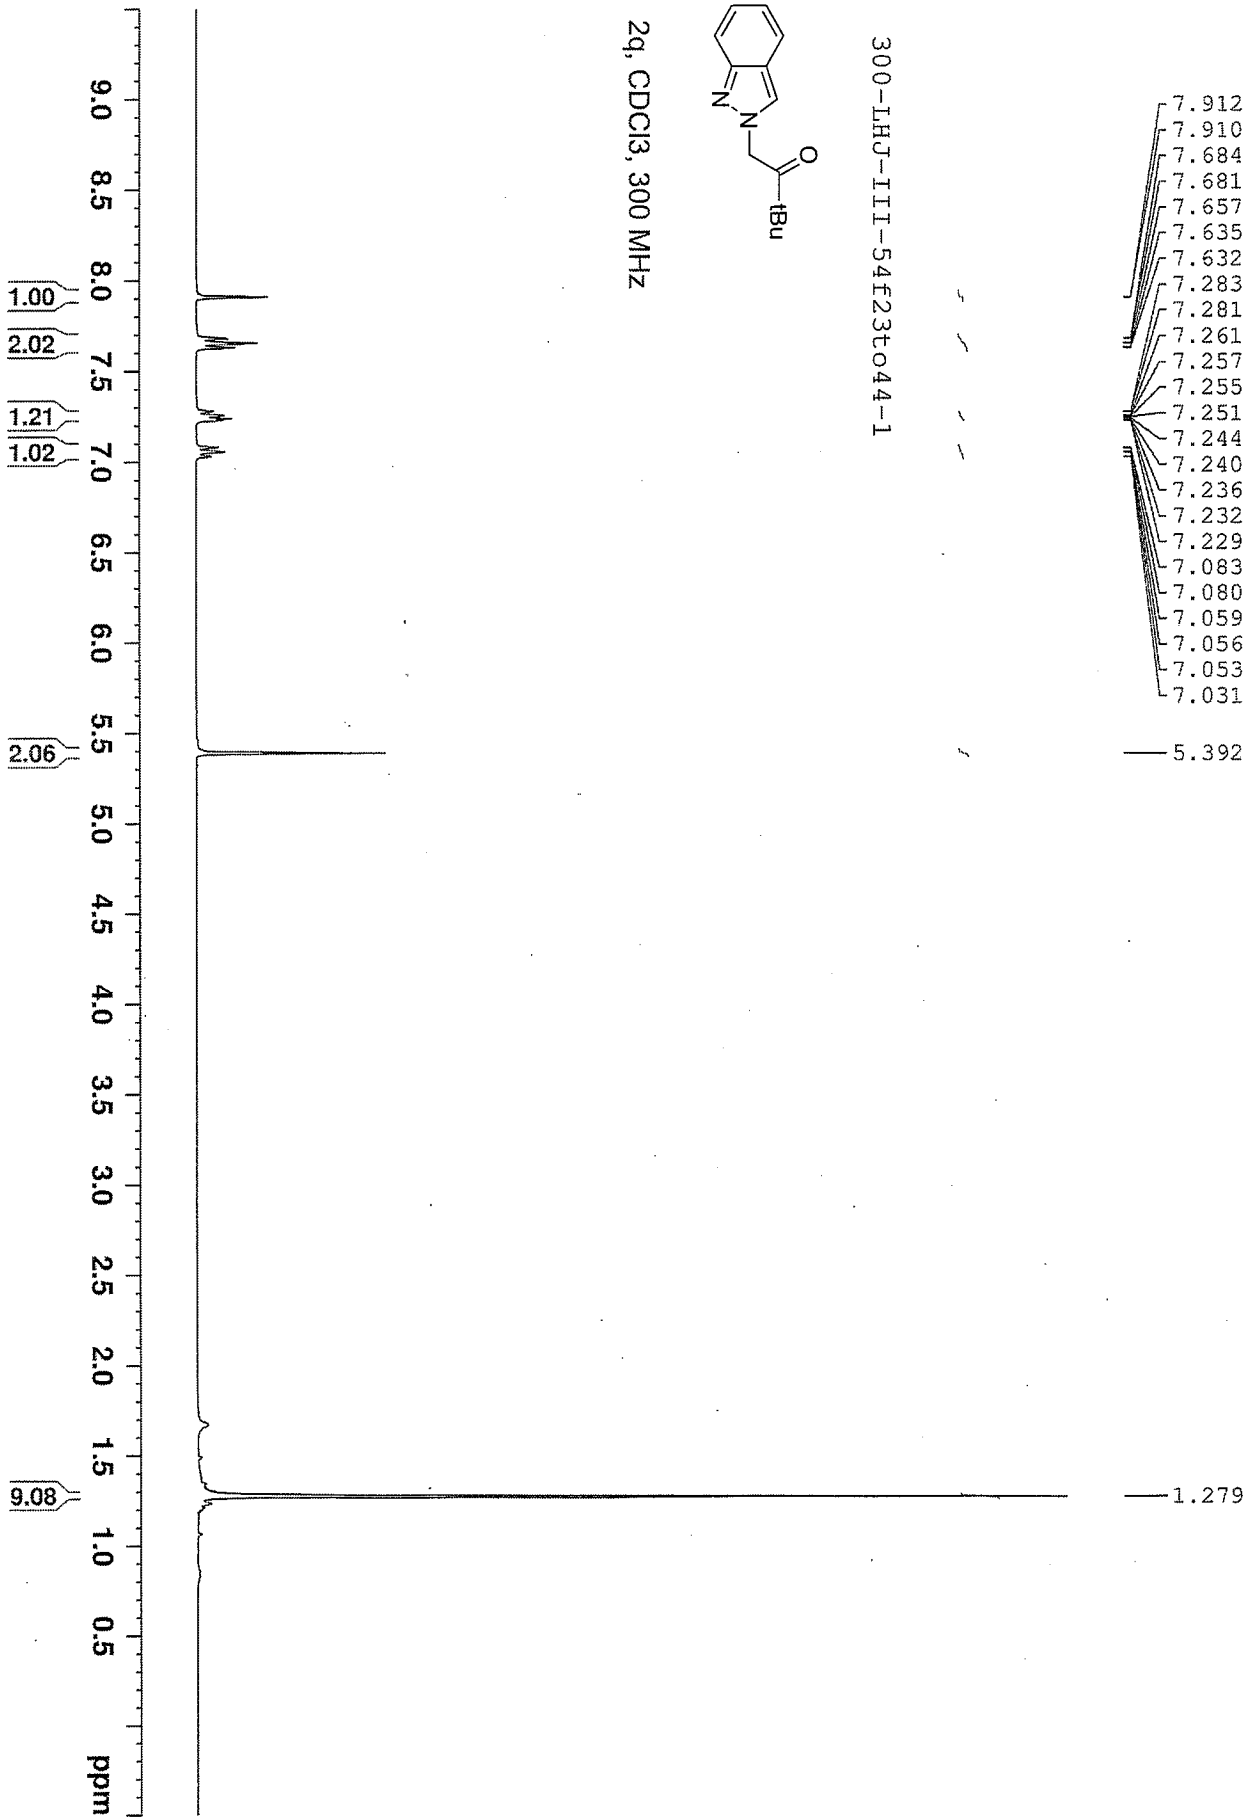

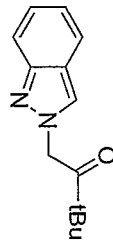

2q, CDCl<sub>3</sub>, 75 MHz

300-LHJ-TII-54F23t044

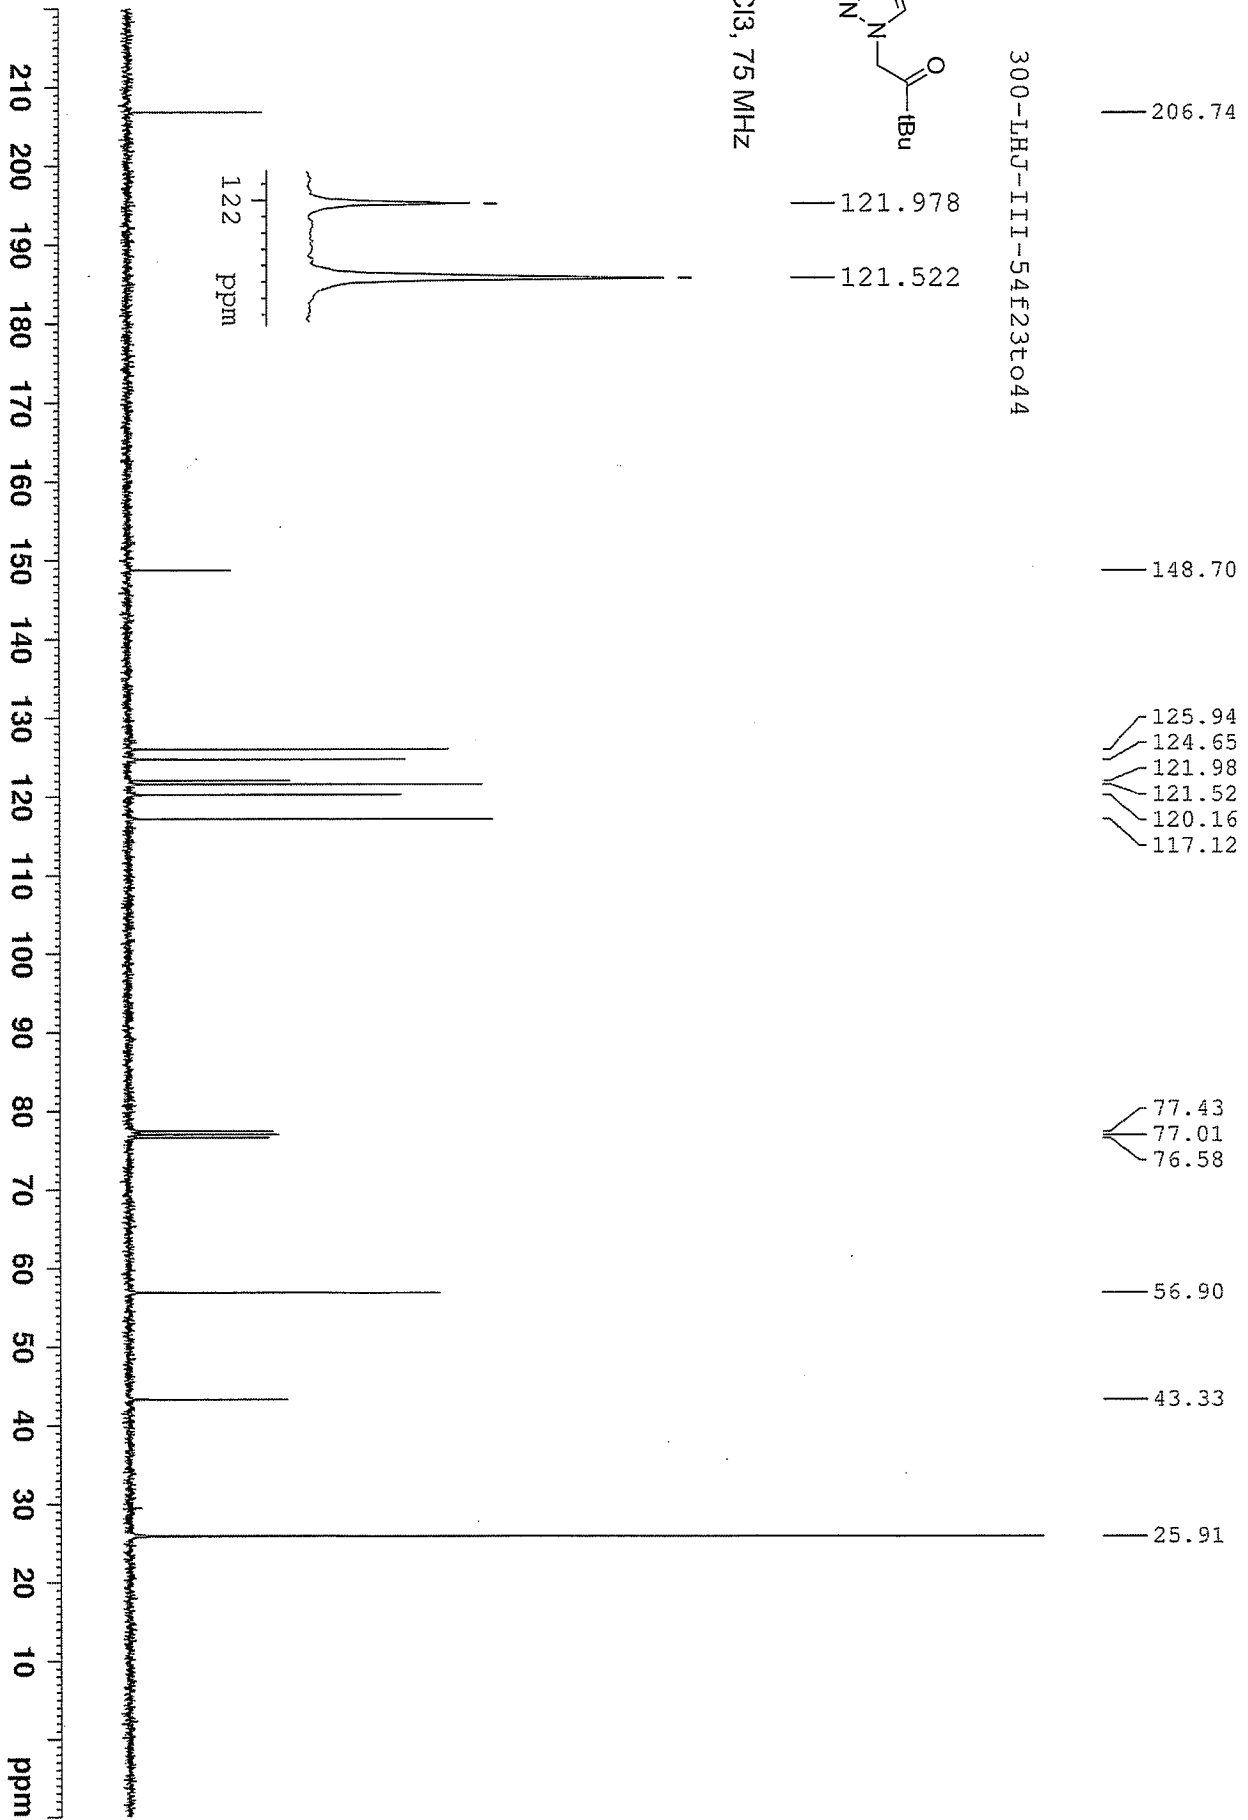

300-LHJ-III-54F23t044 (HSQC)

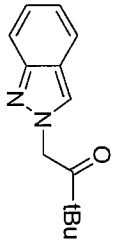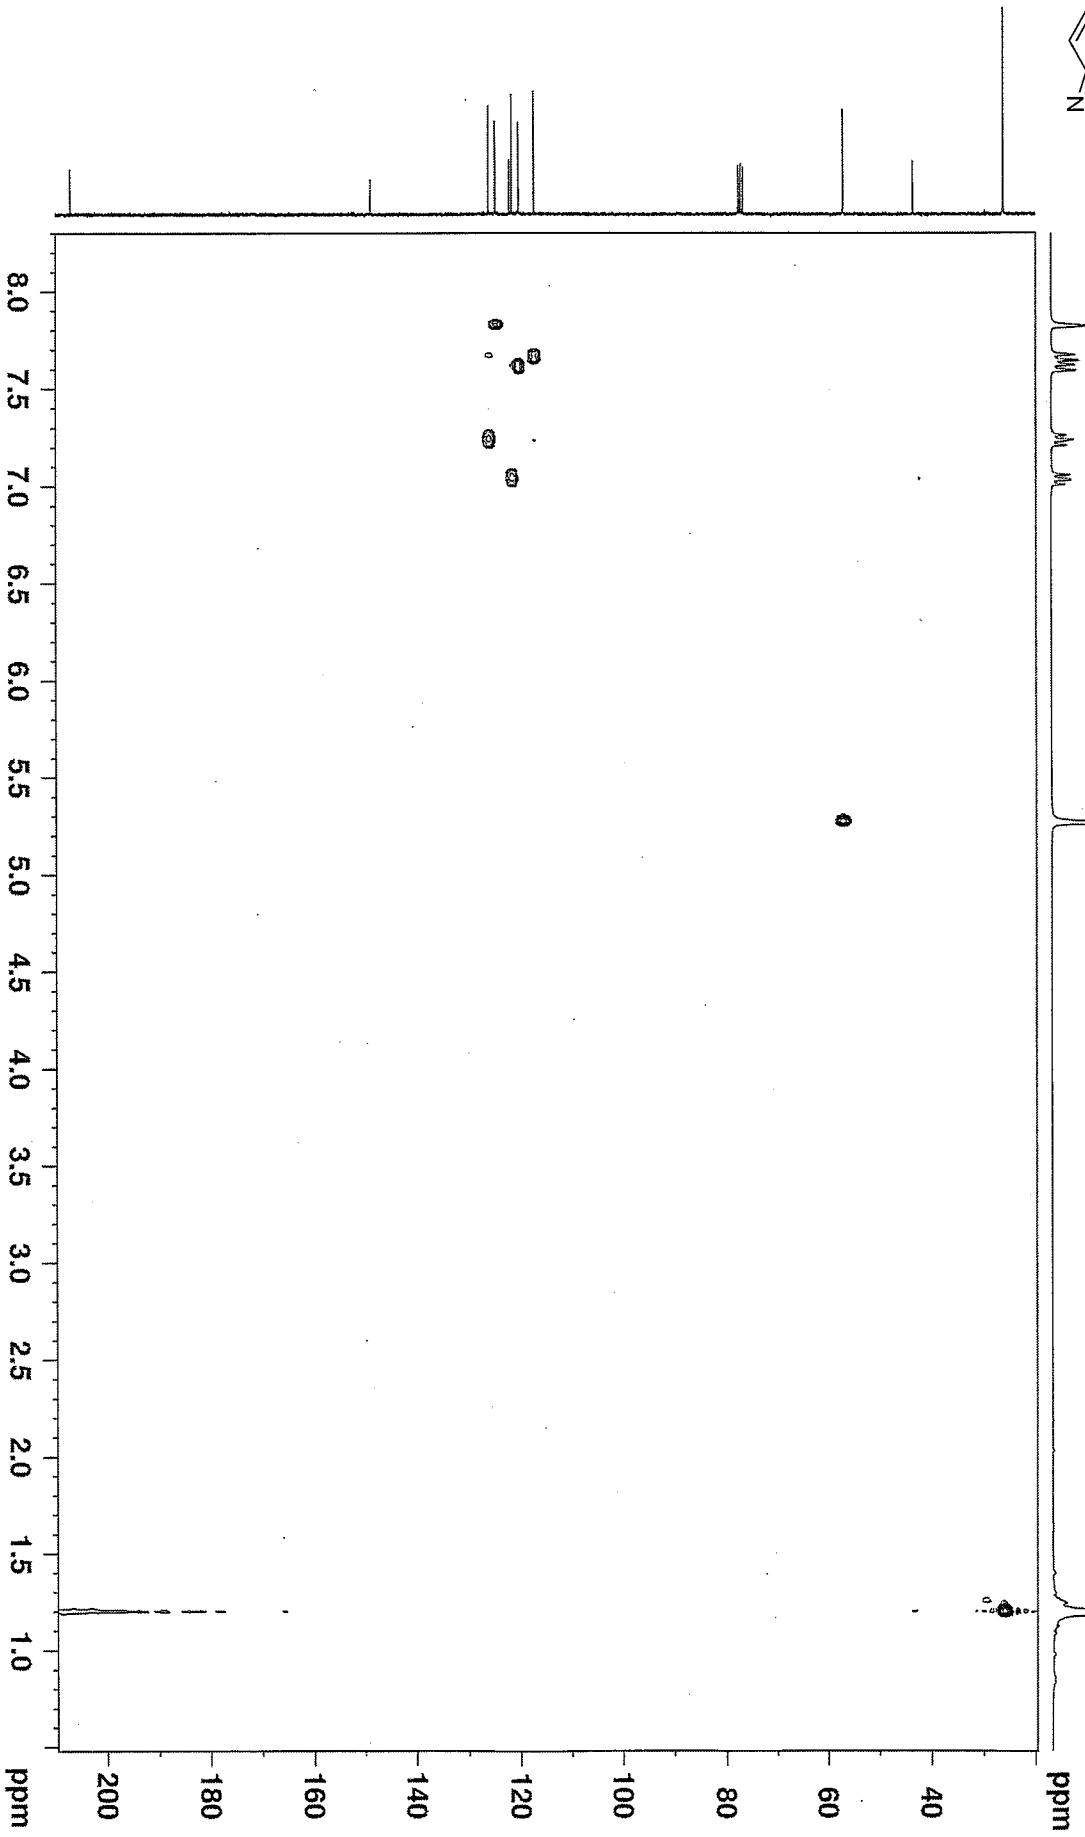

300-LHJ-III-54F23to44 (HMBC)

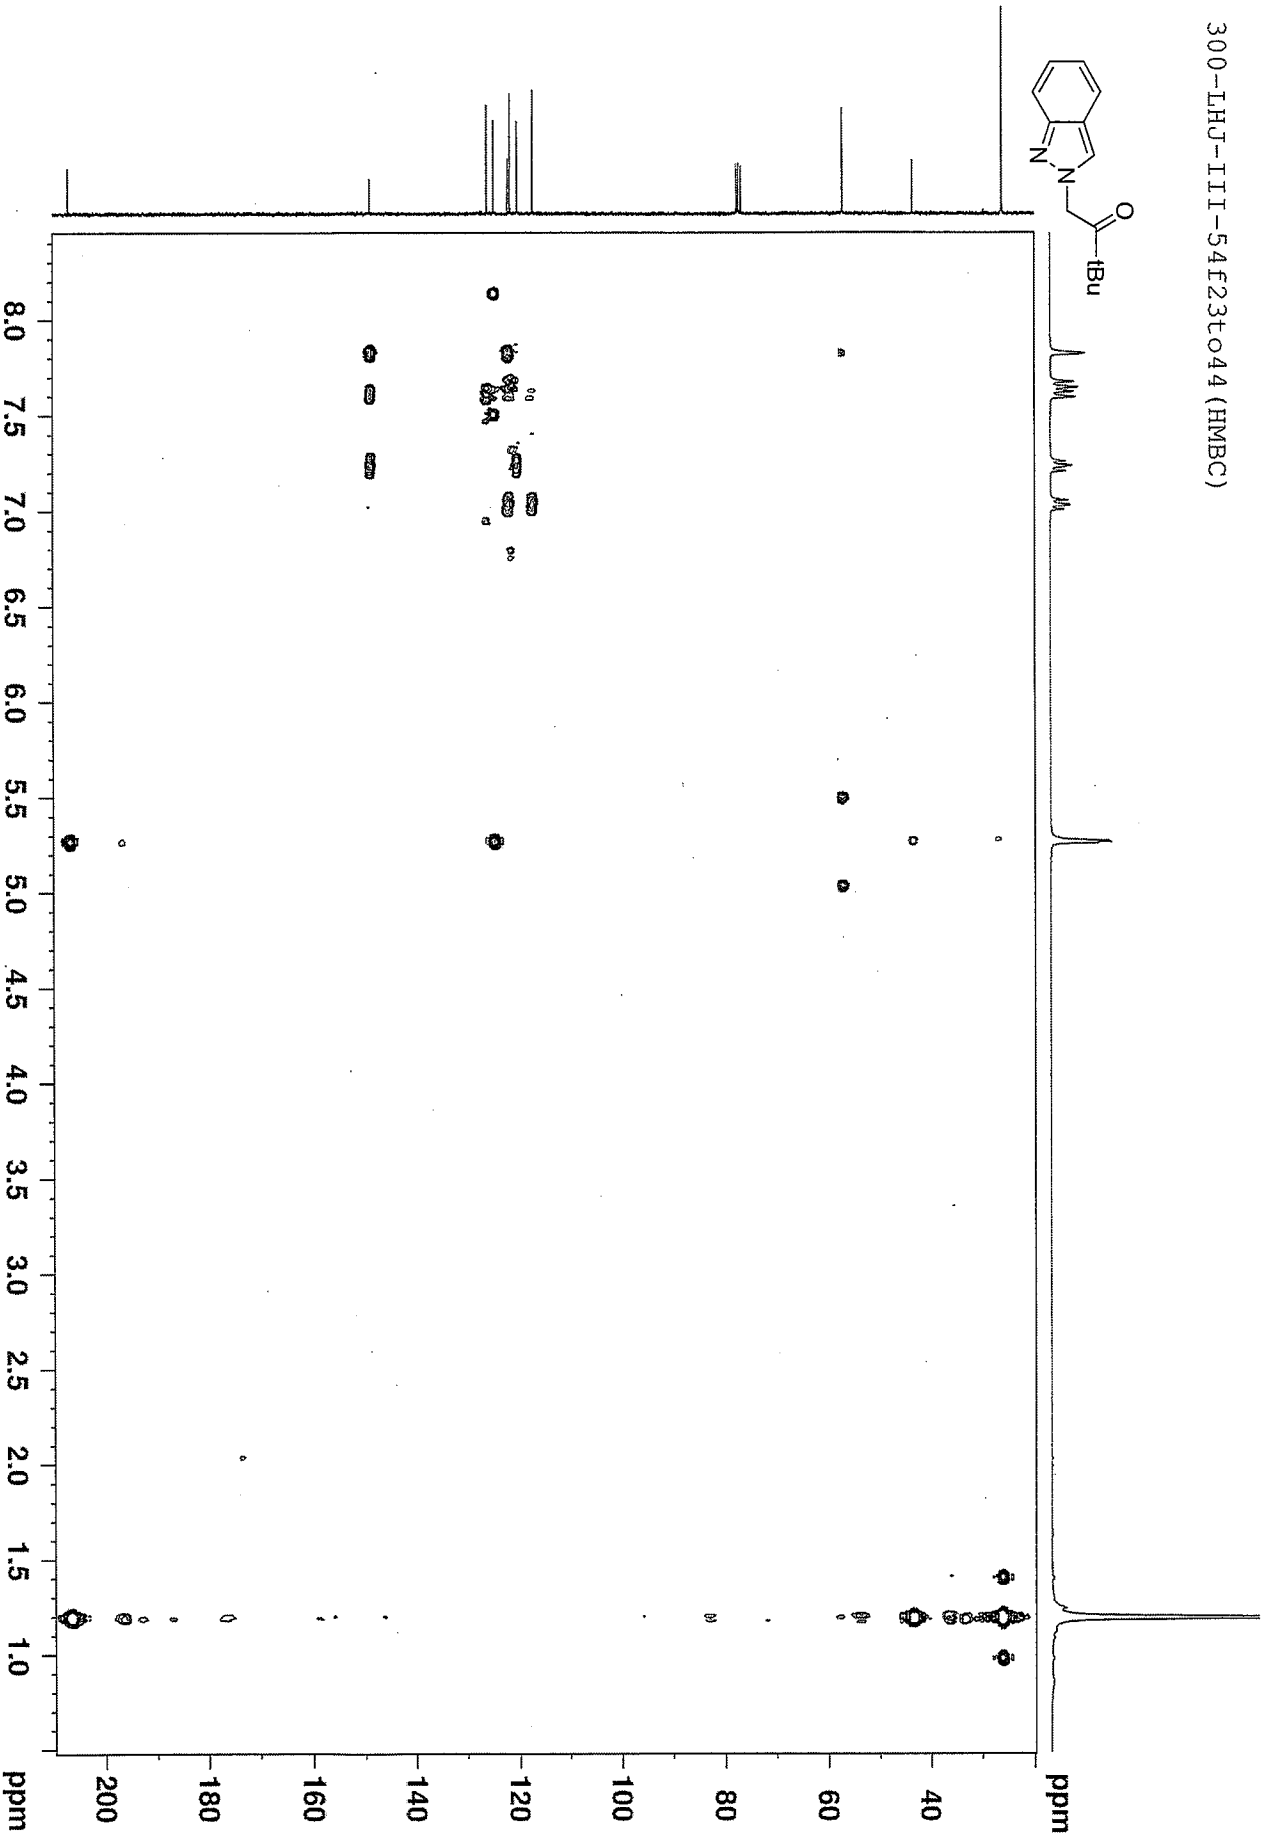



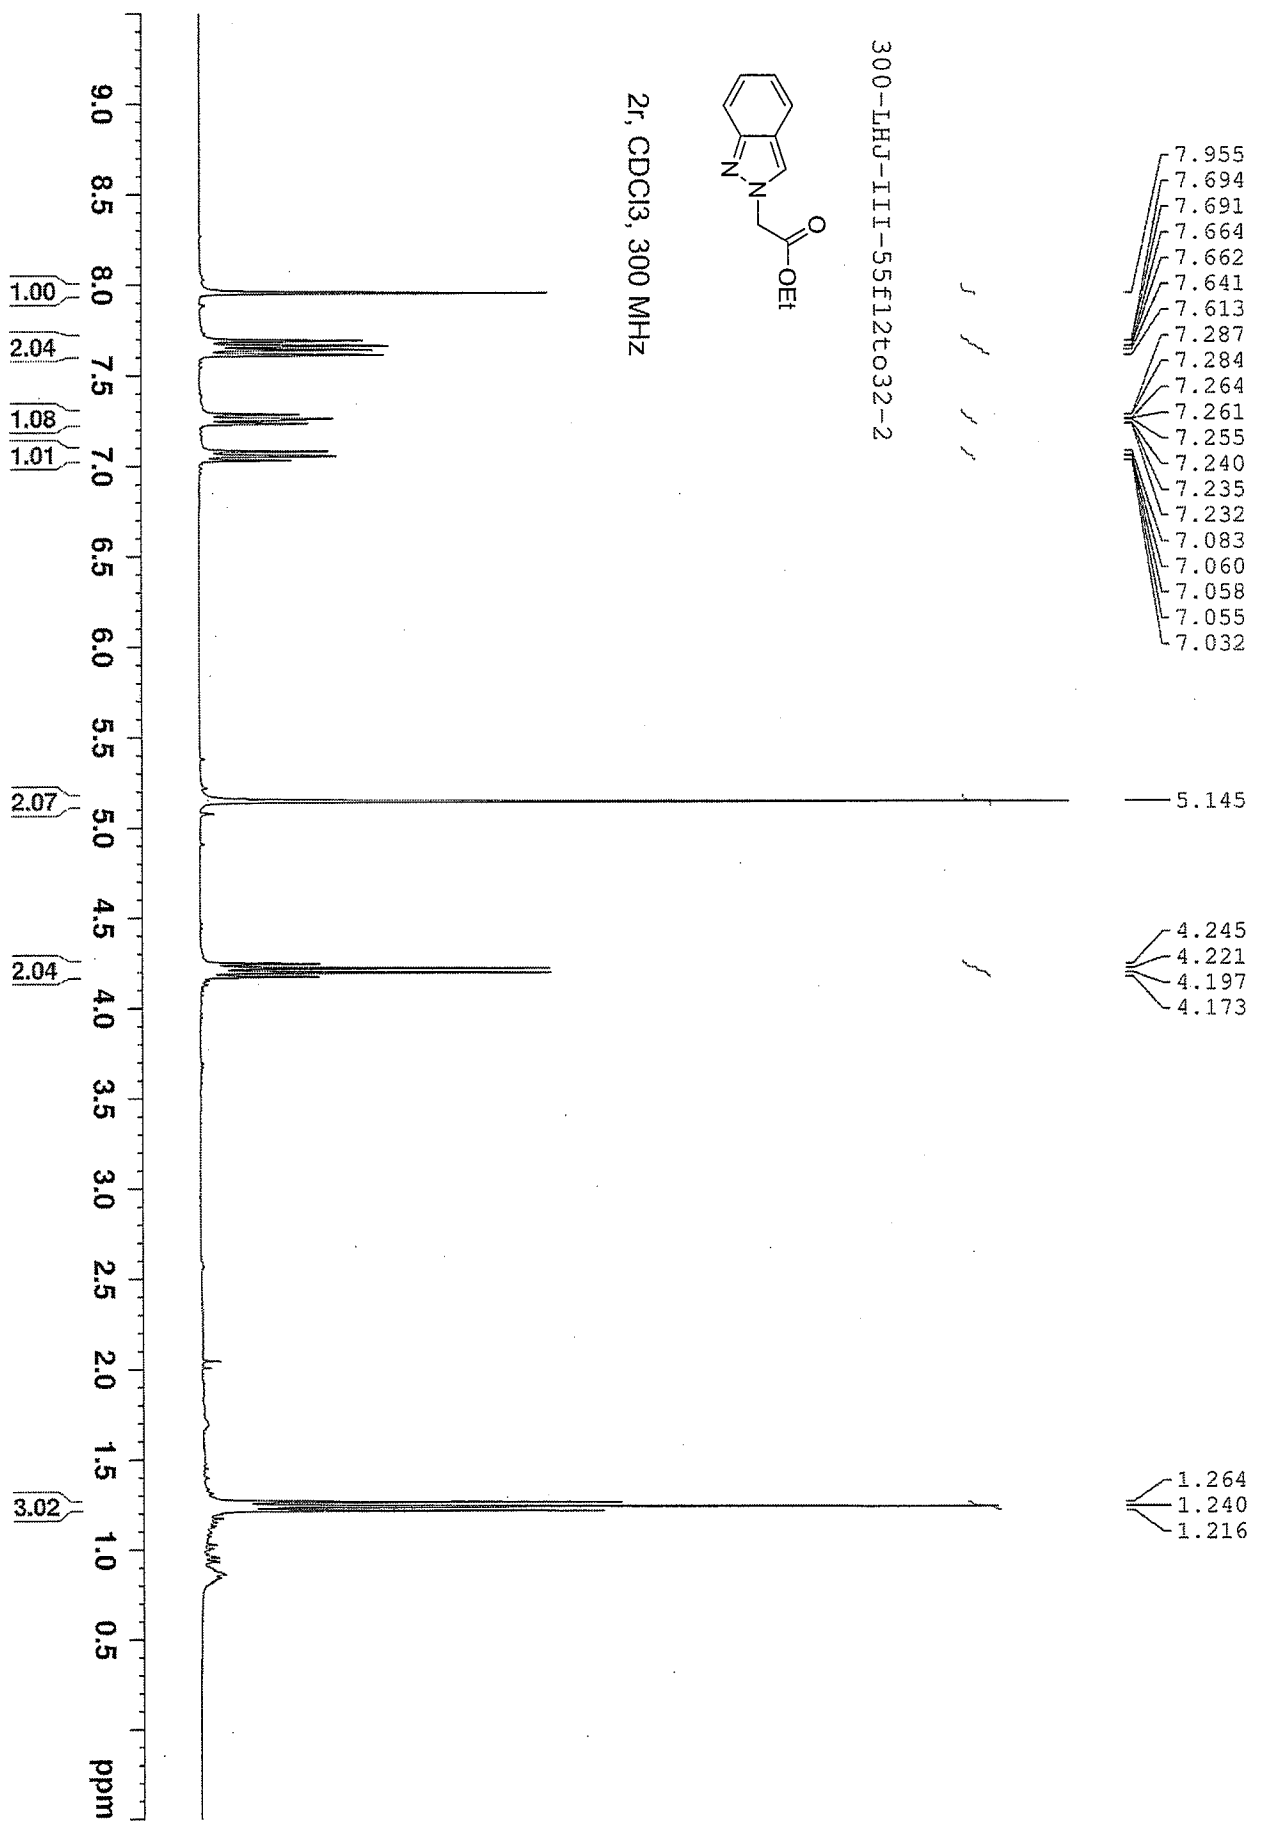

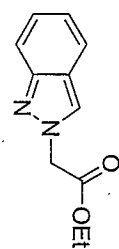

2f, CDCl<sub>3</sub>, 75 MHz

300-LHJ-III-55F12t032

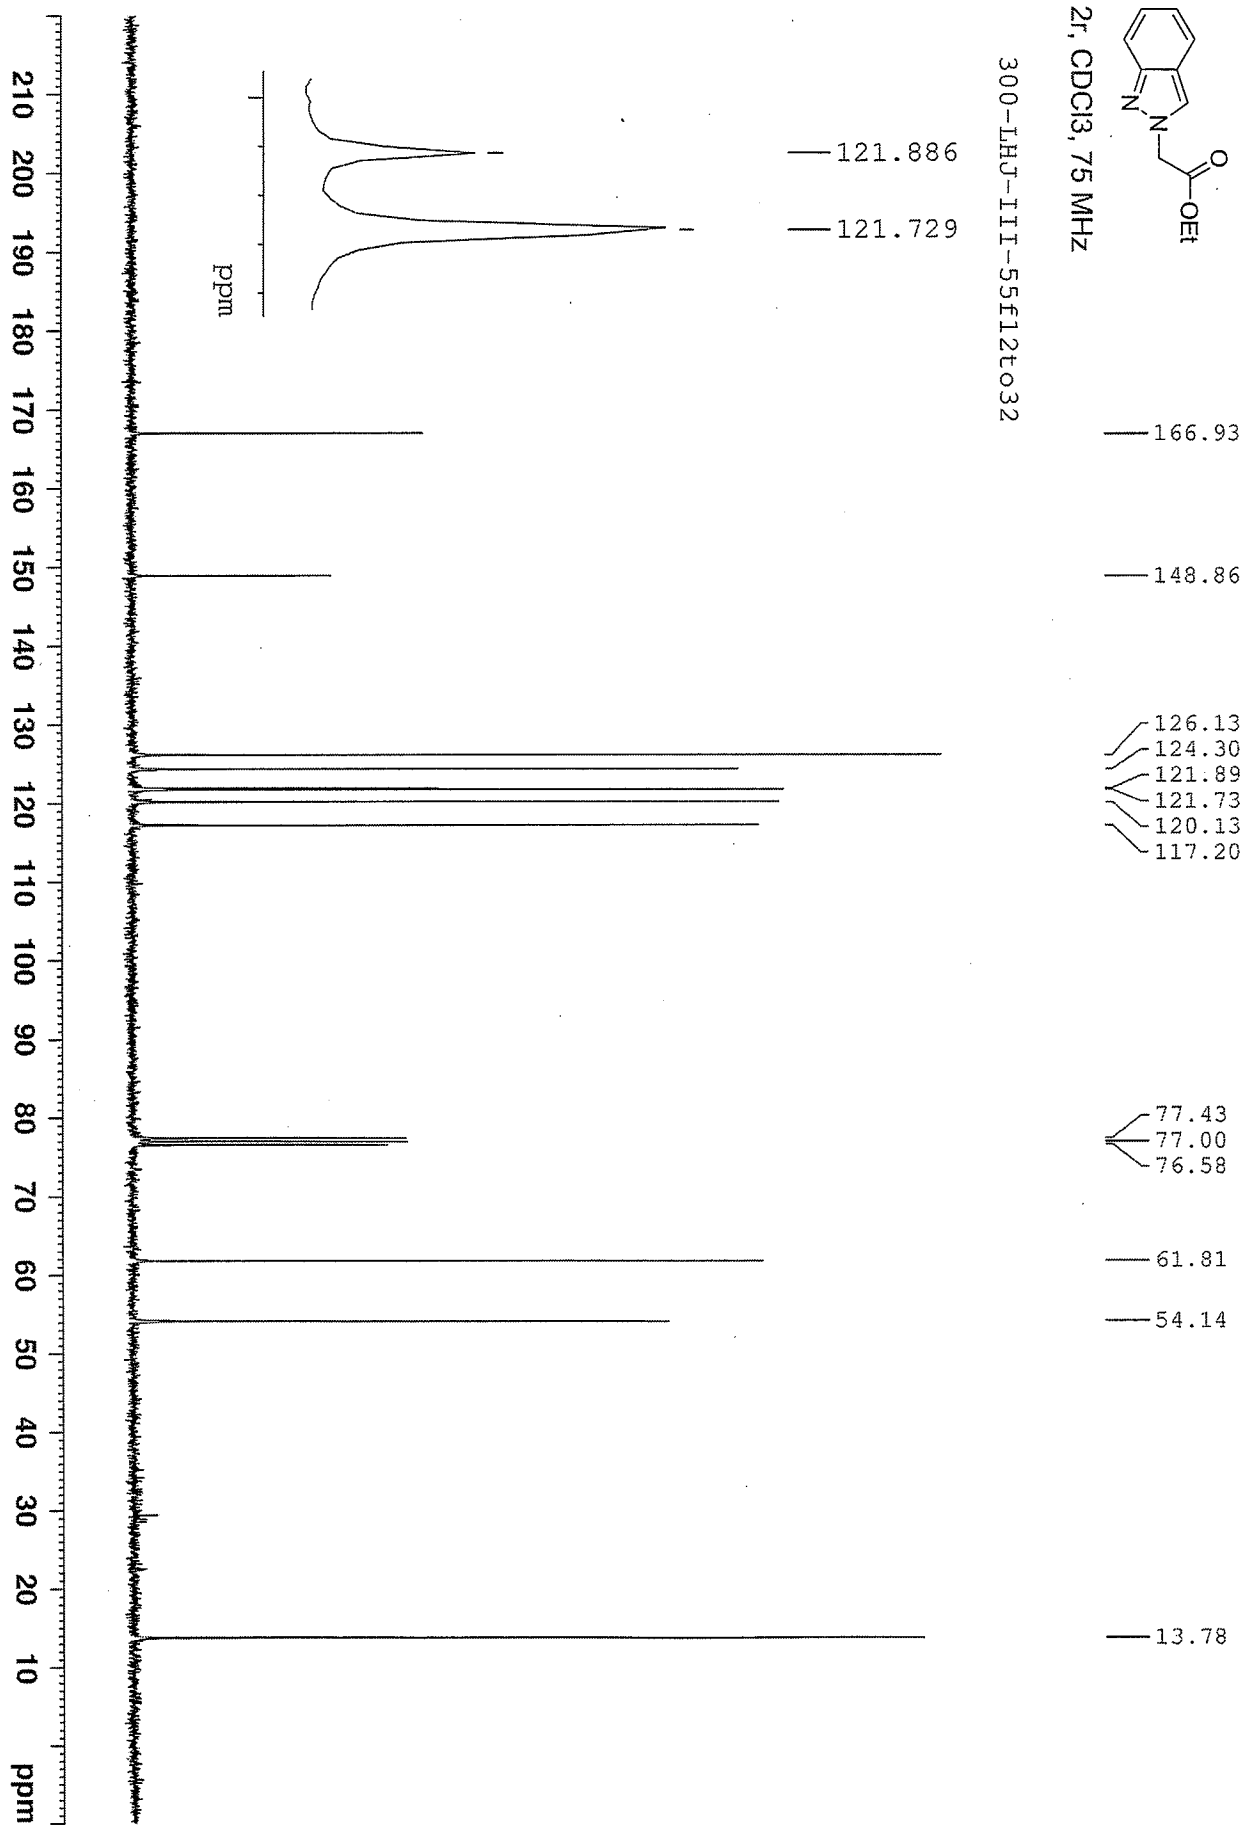

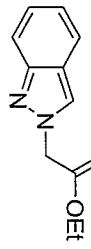

300-LHJ-III-55F12t032 (HSQC)

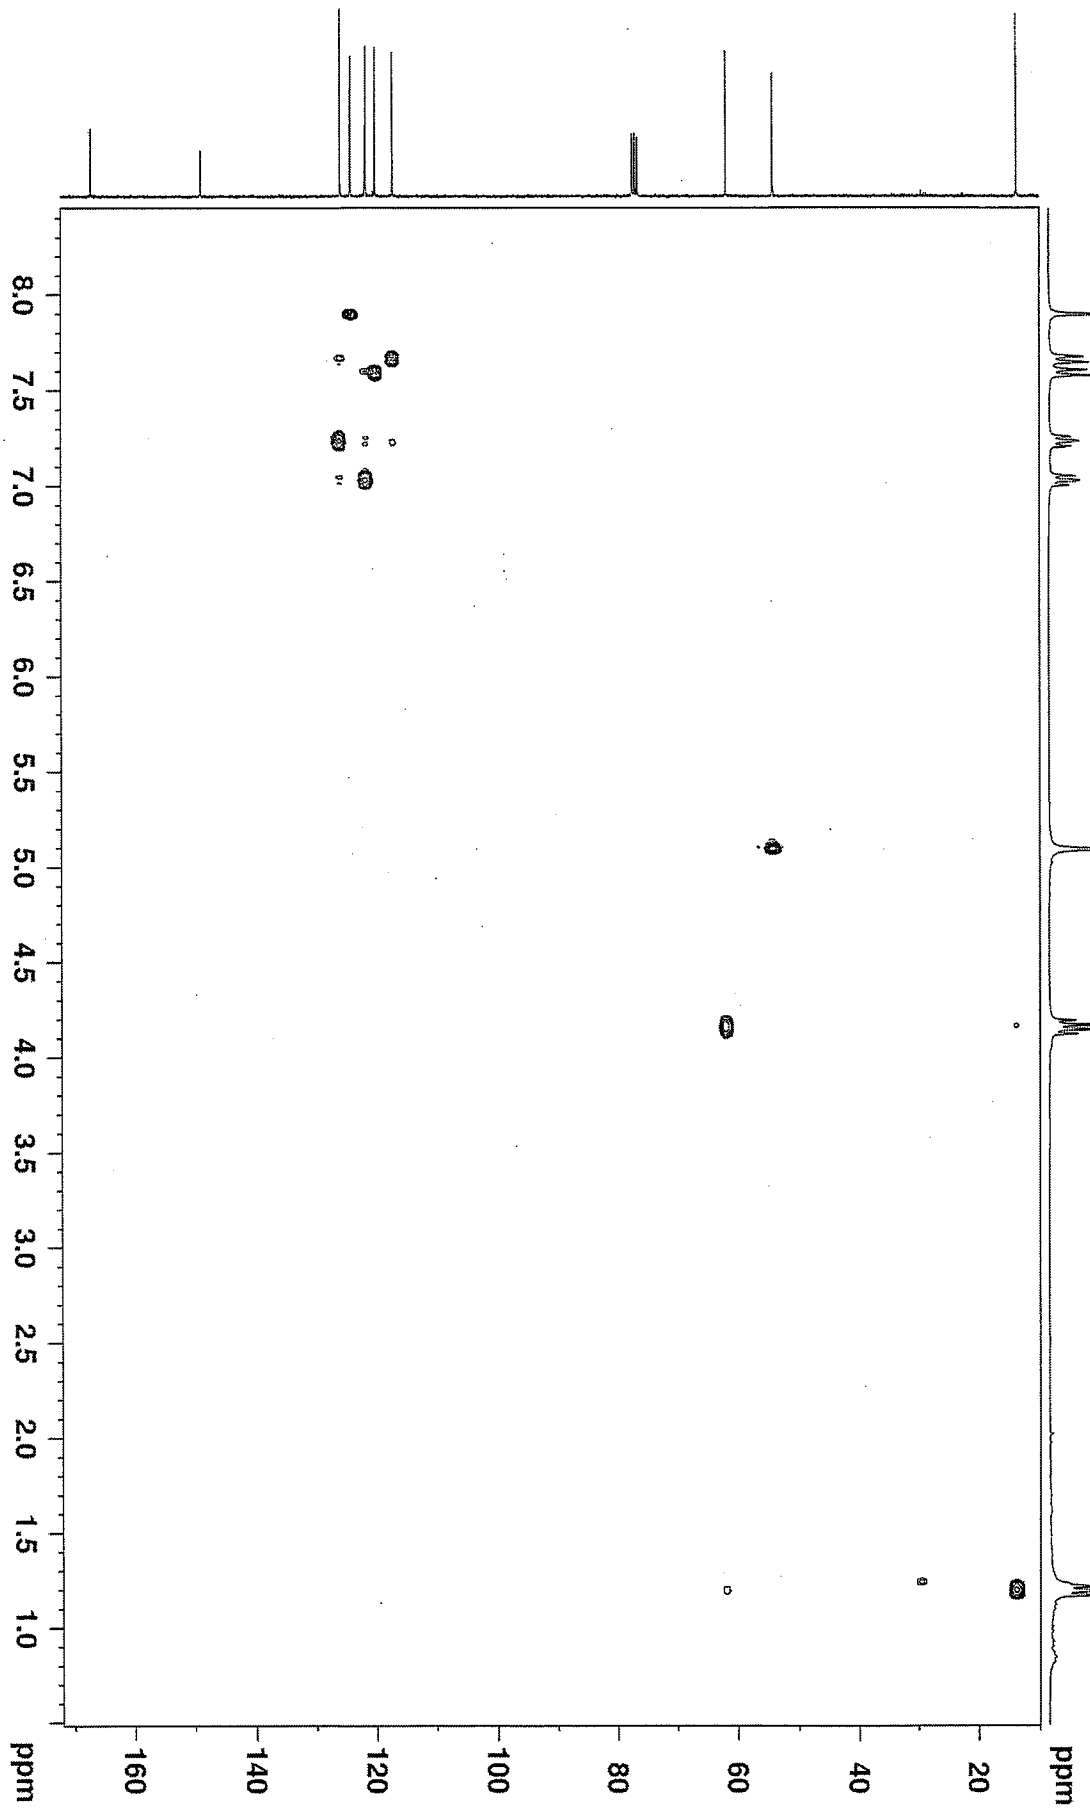

300-LHJ-III-55FI2FO32 (HMBC)

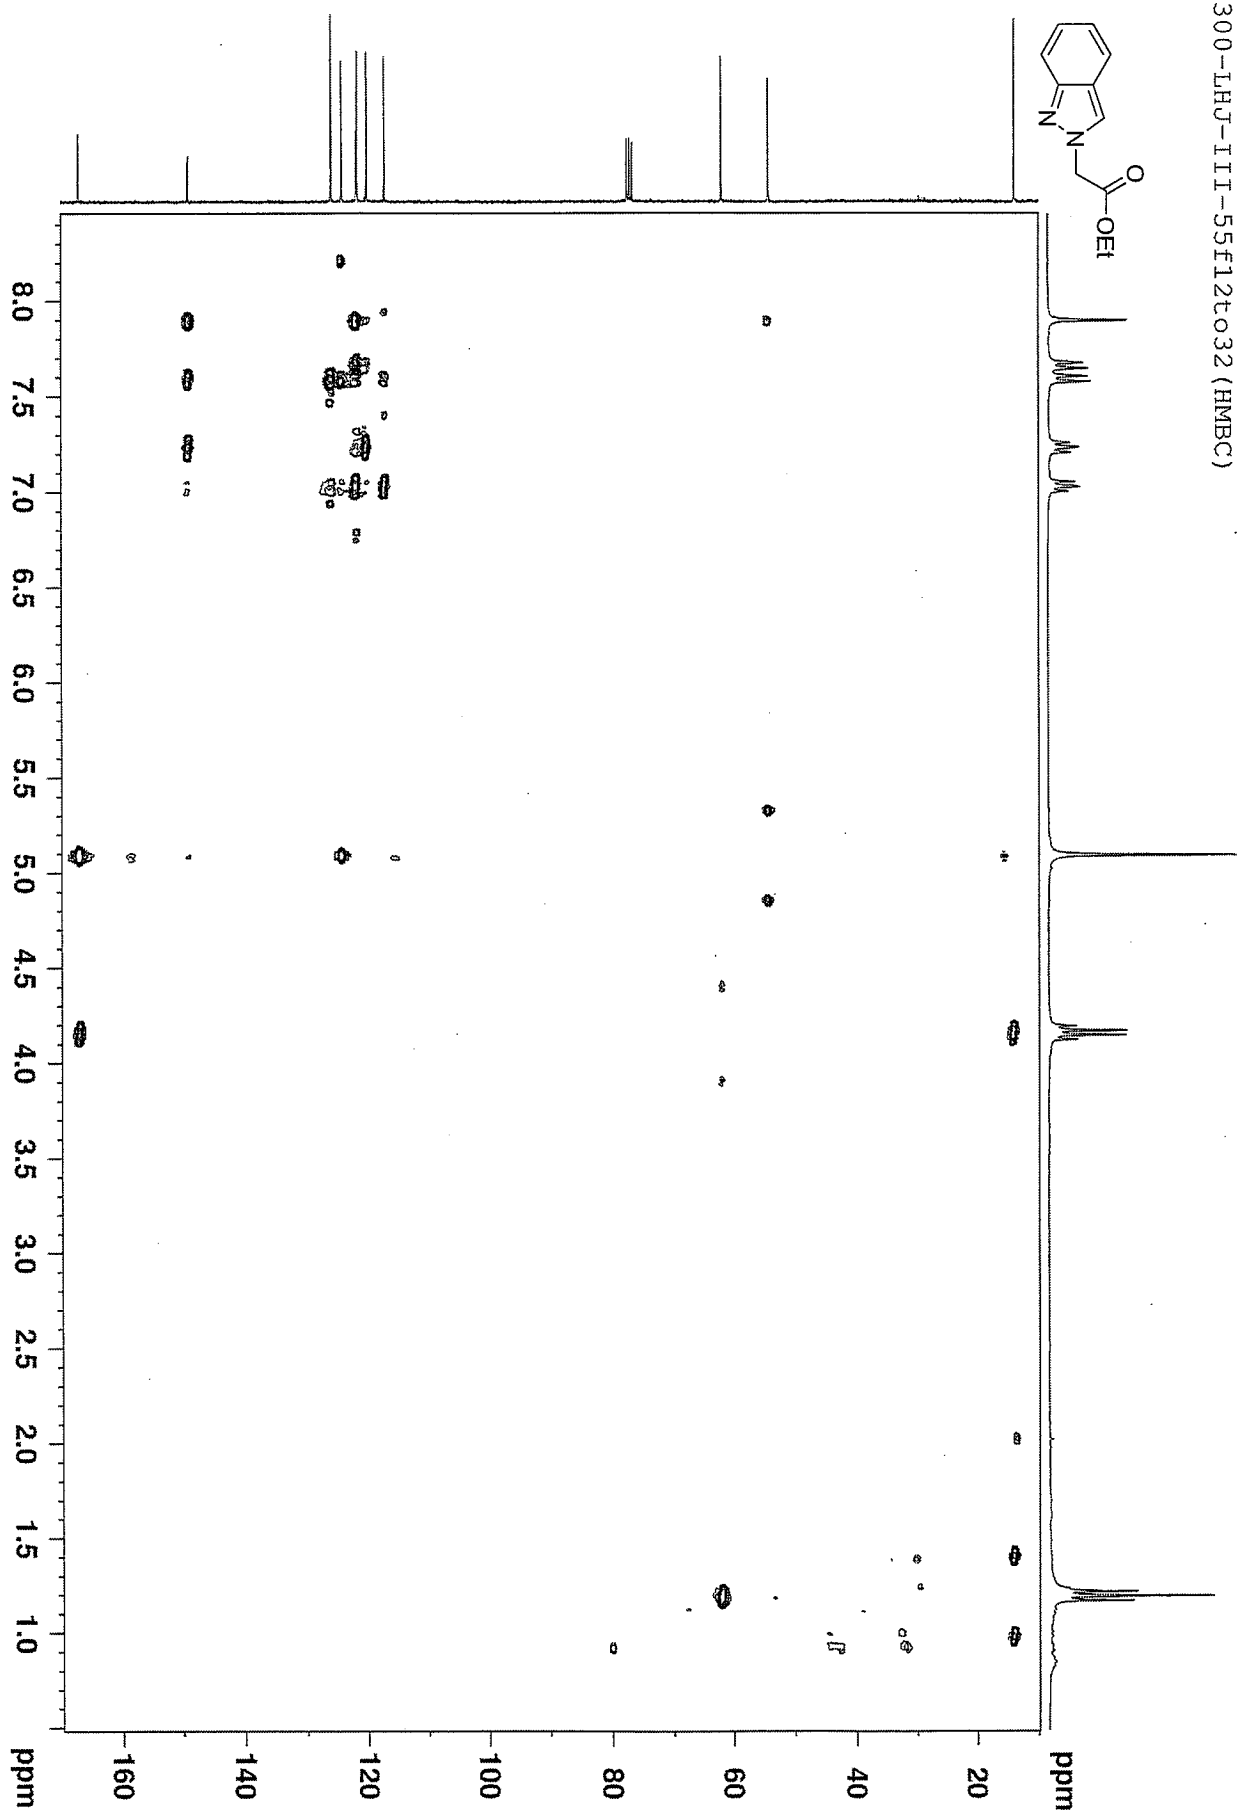

4a, CDCl<sub>3</sub>, 300 MHz

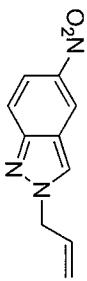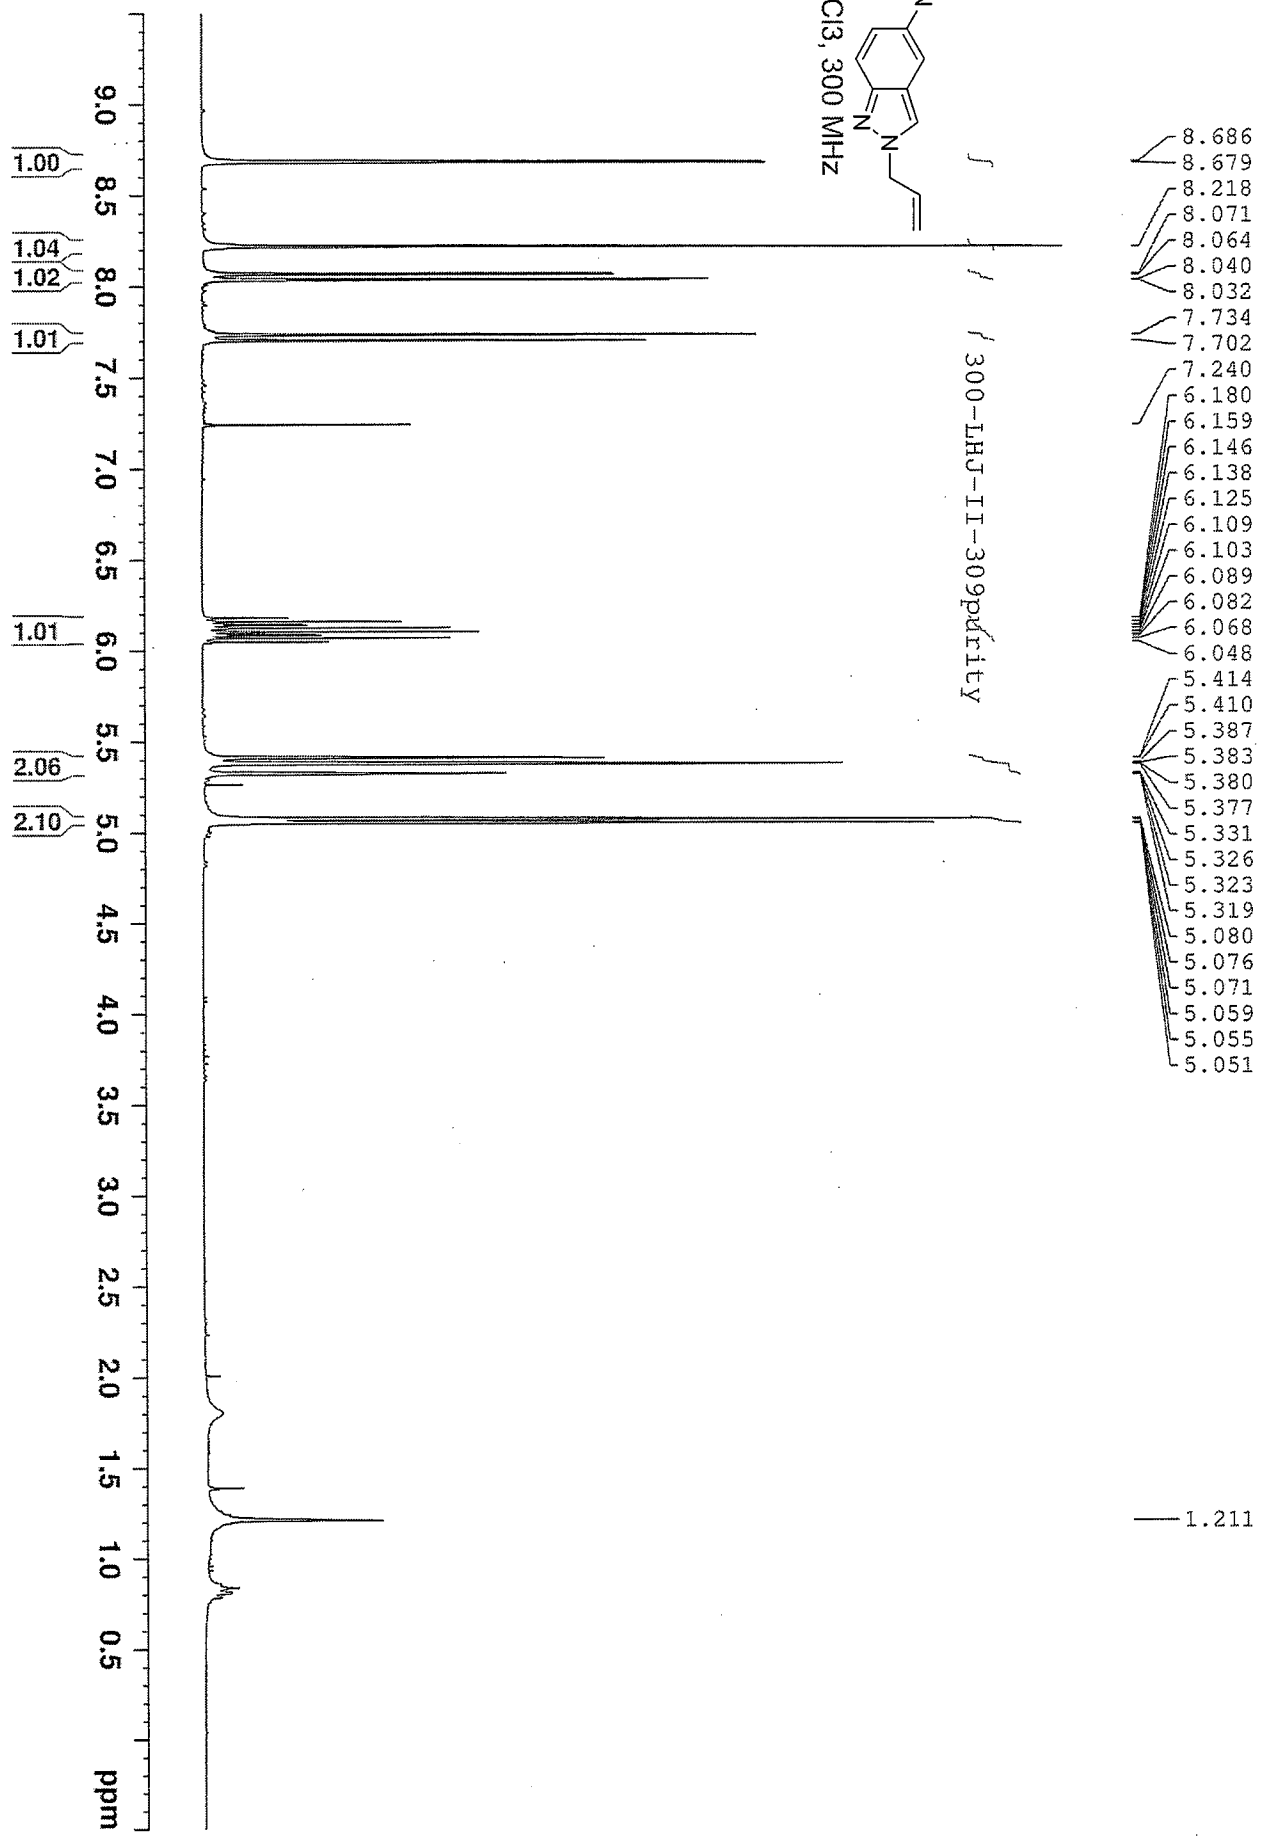

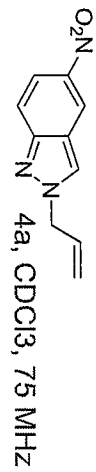

300-LHF-II-309purity

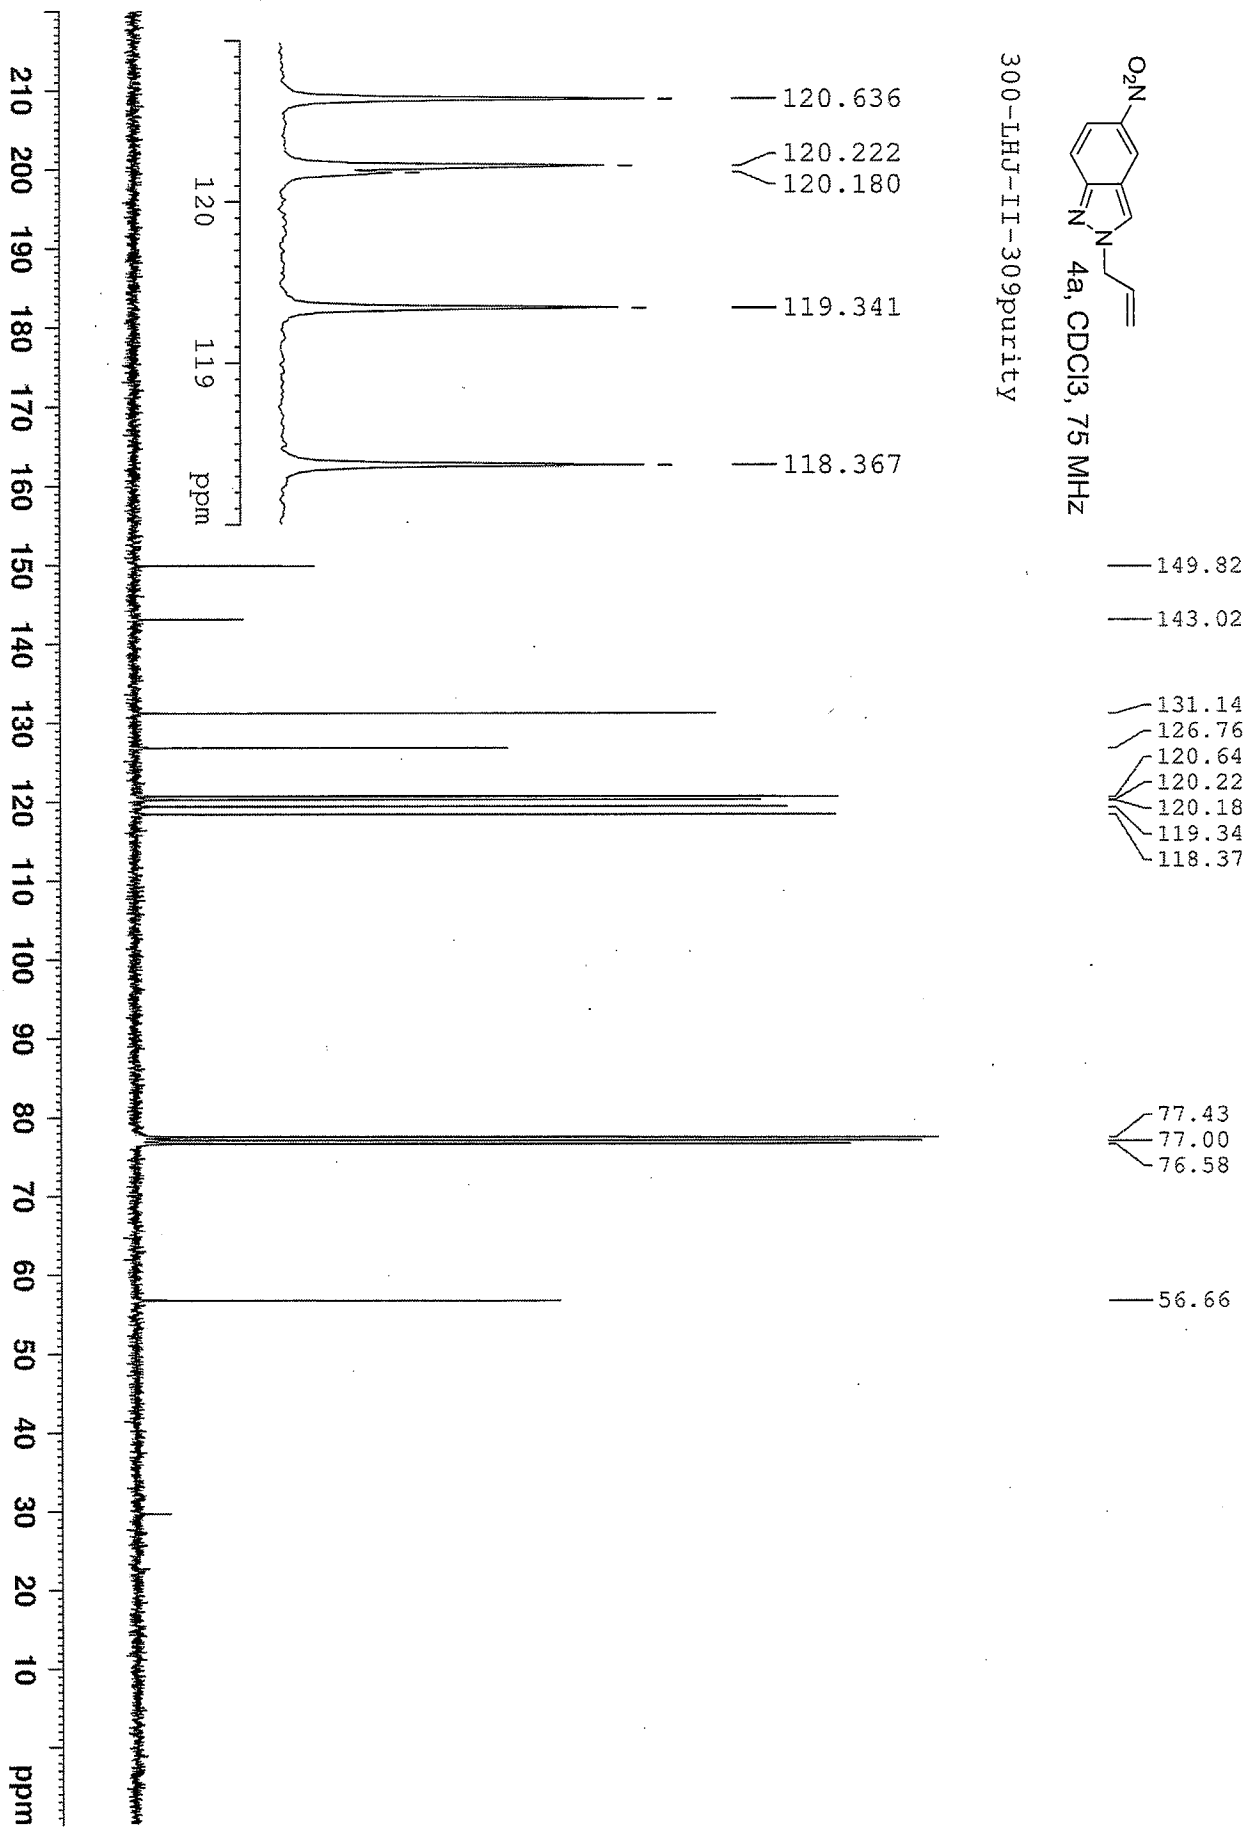

300-LHJ-III-127f21t036 (HSQC)

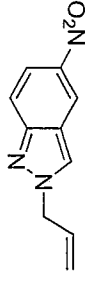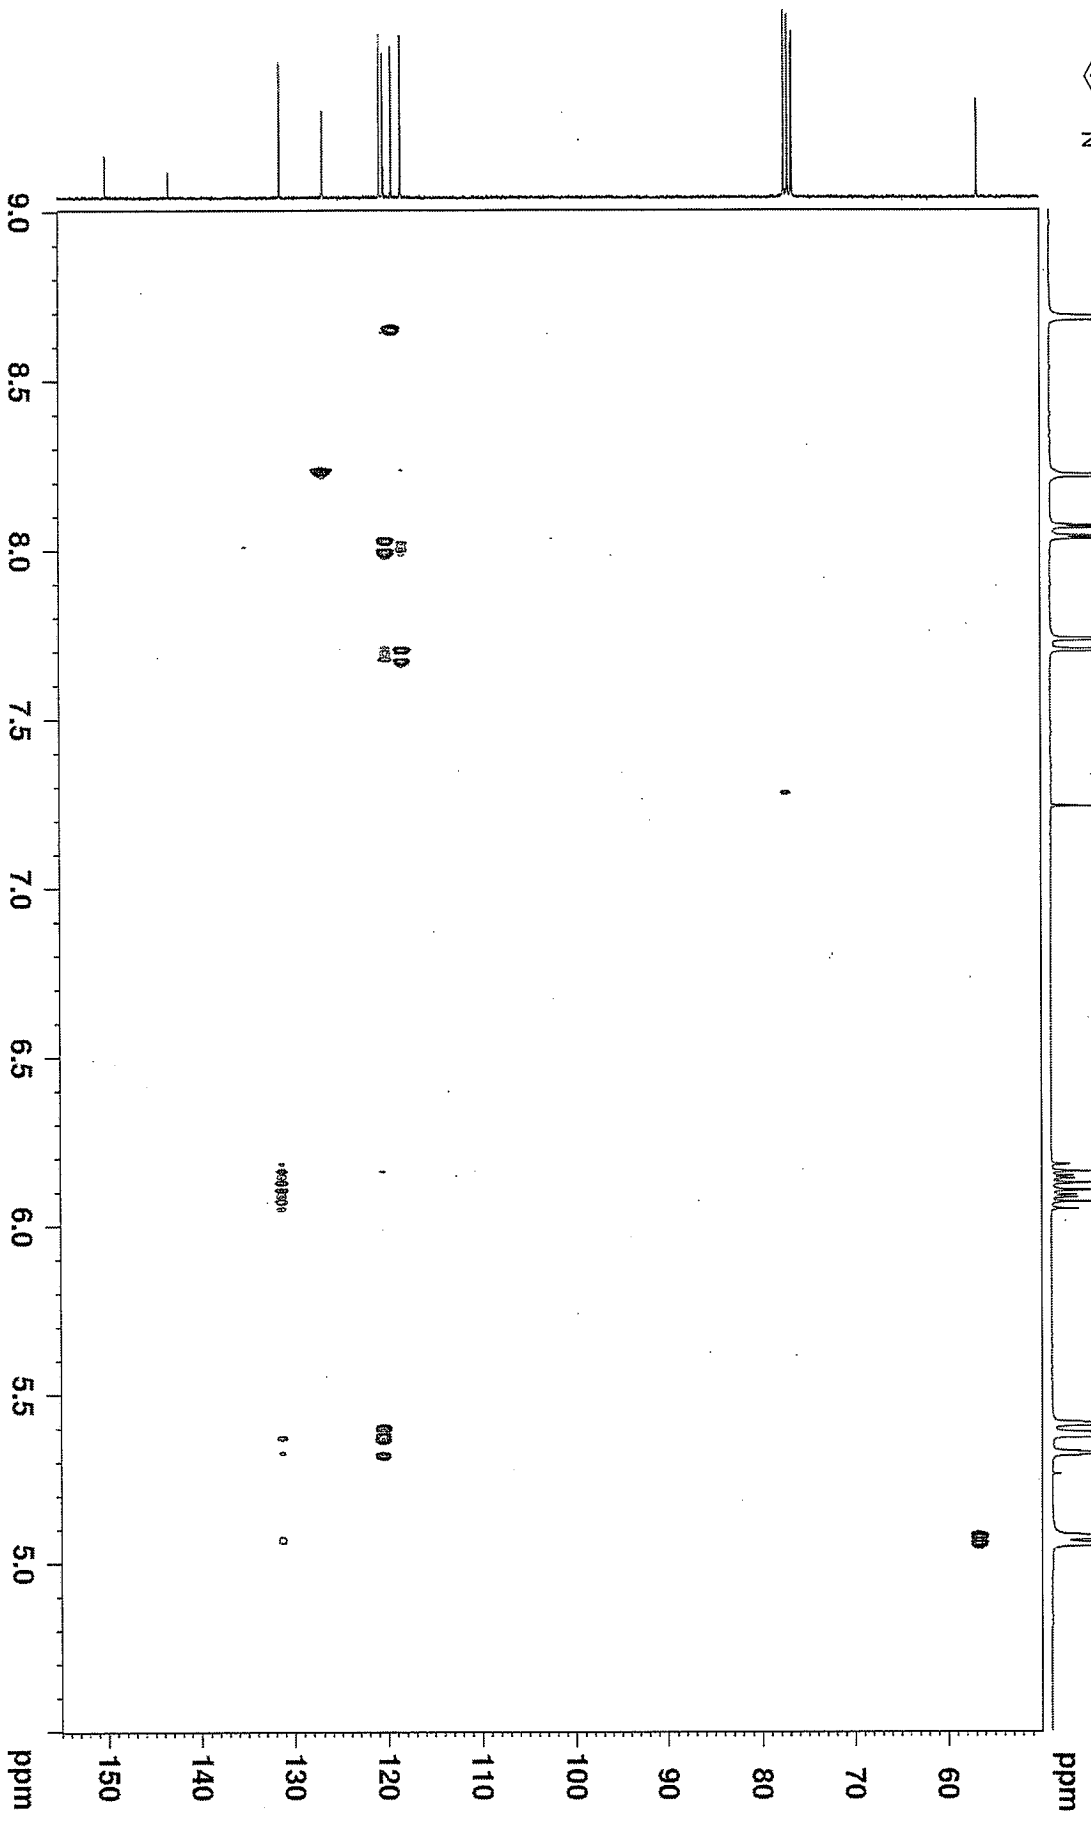

300-LHJ-III-127f21t036 (HMBC)

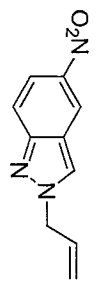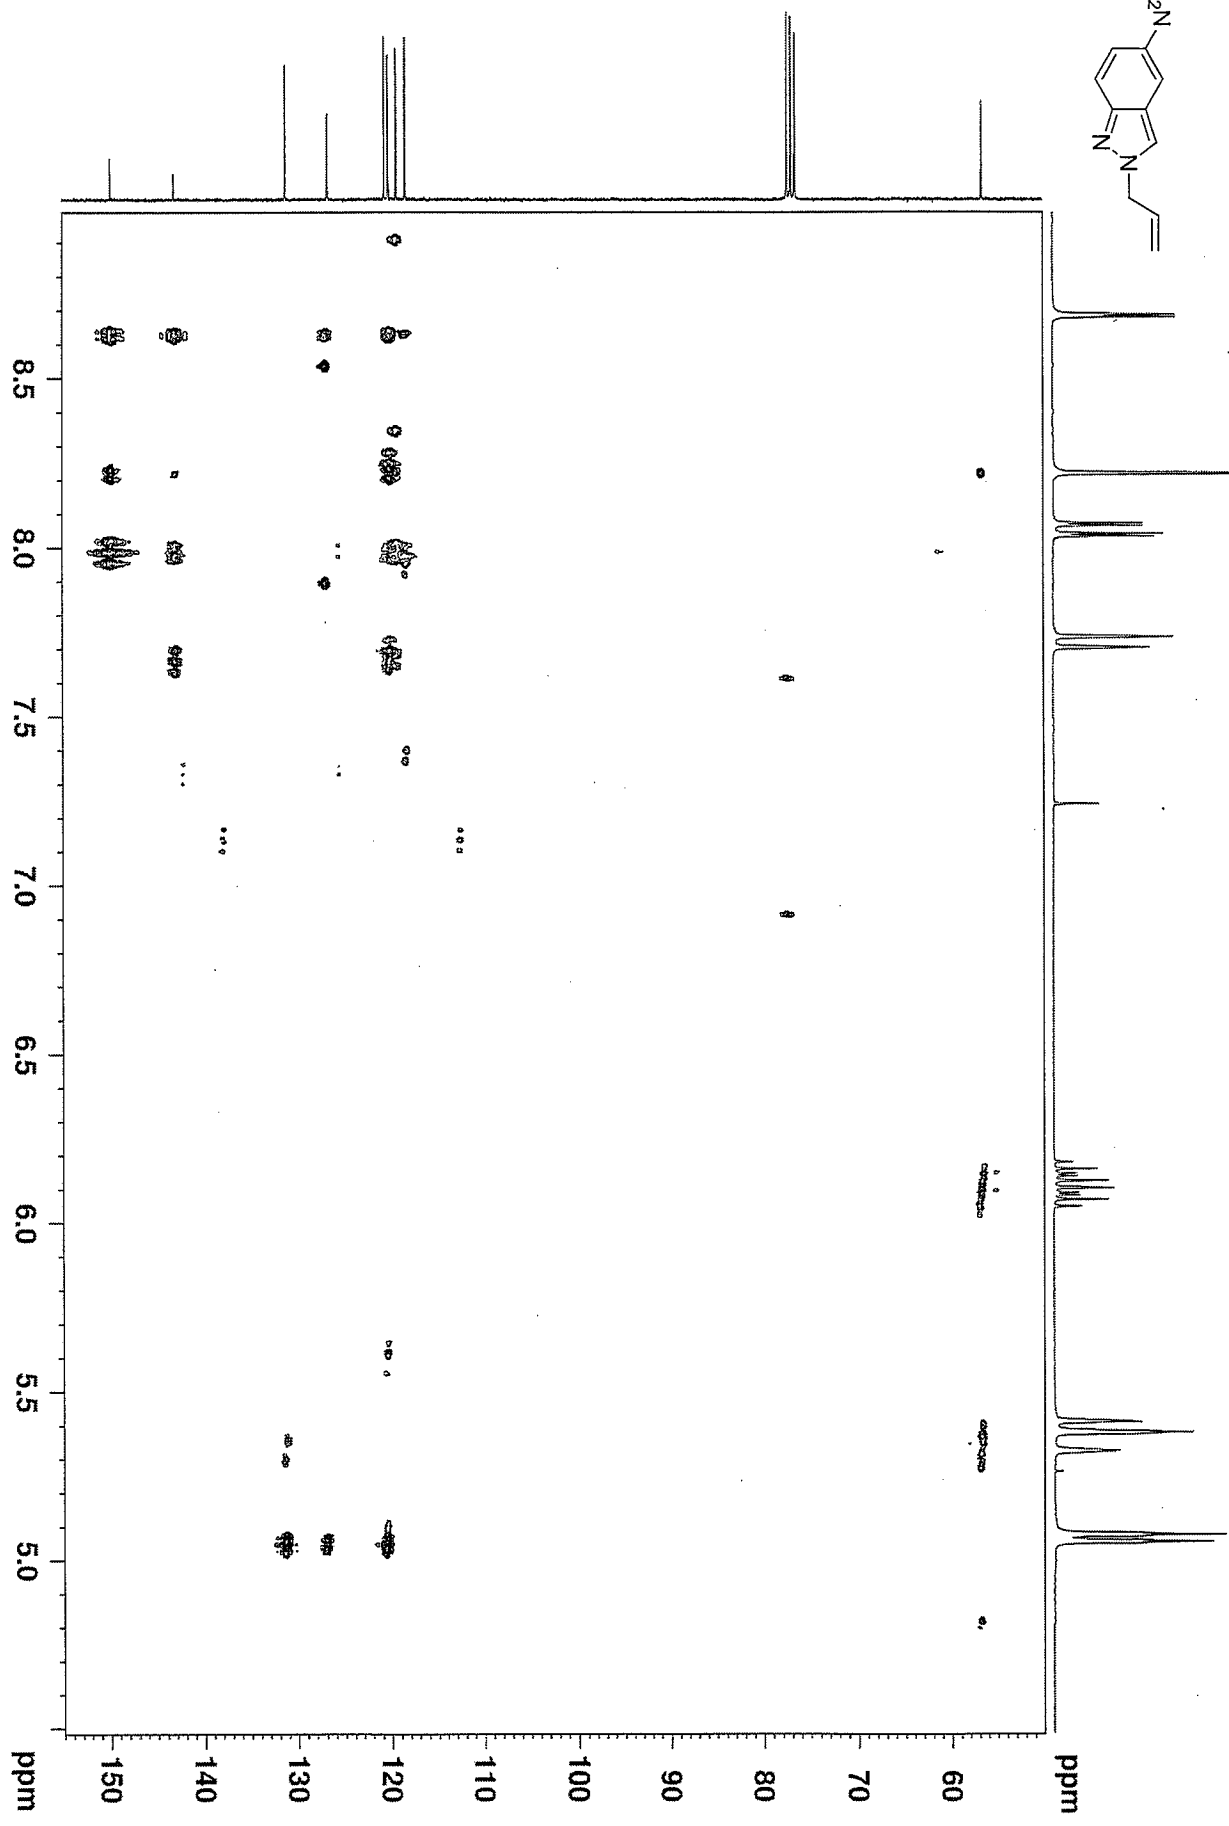



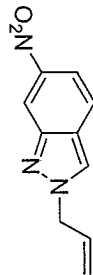

4b, CDCl<sub>3</sub>, 300 MHz

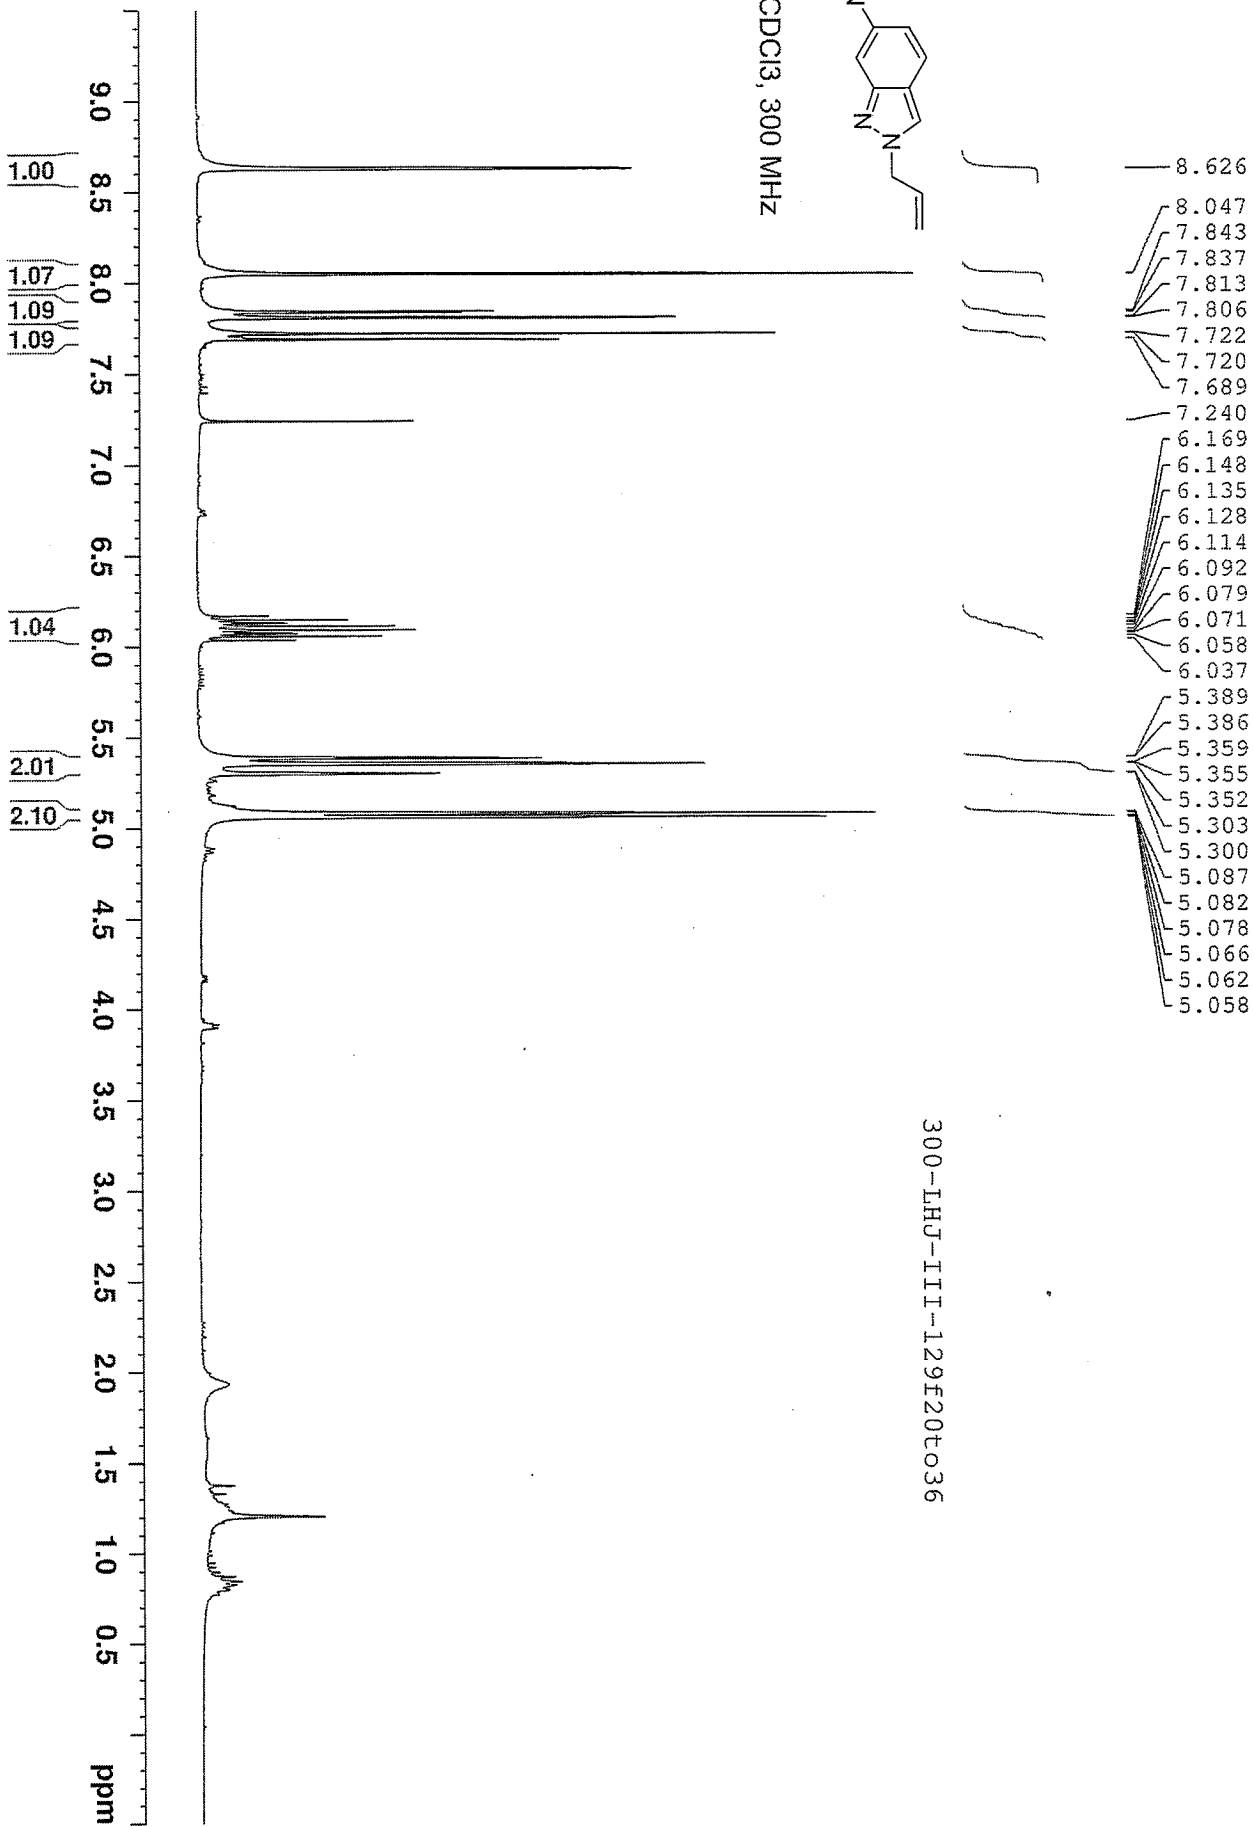

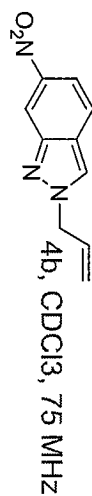

300-LHJ-III-129F20t036

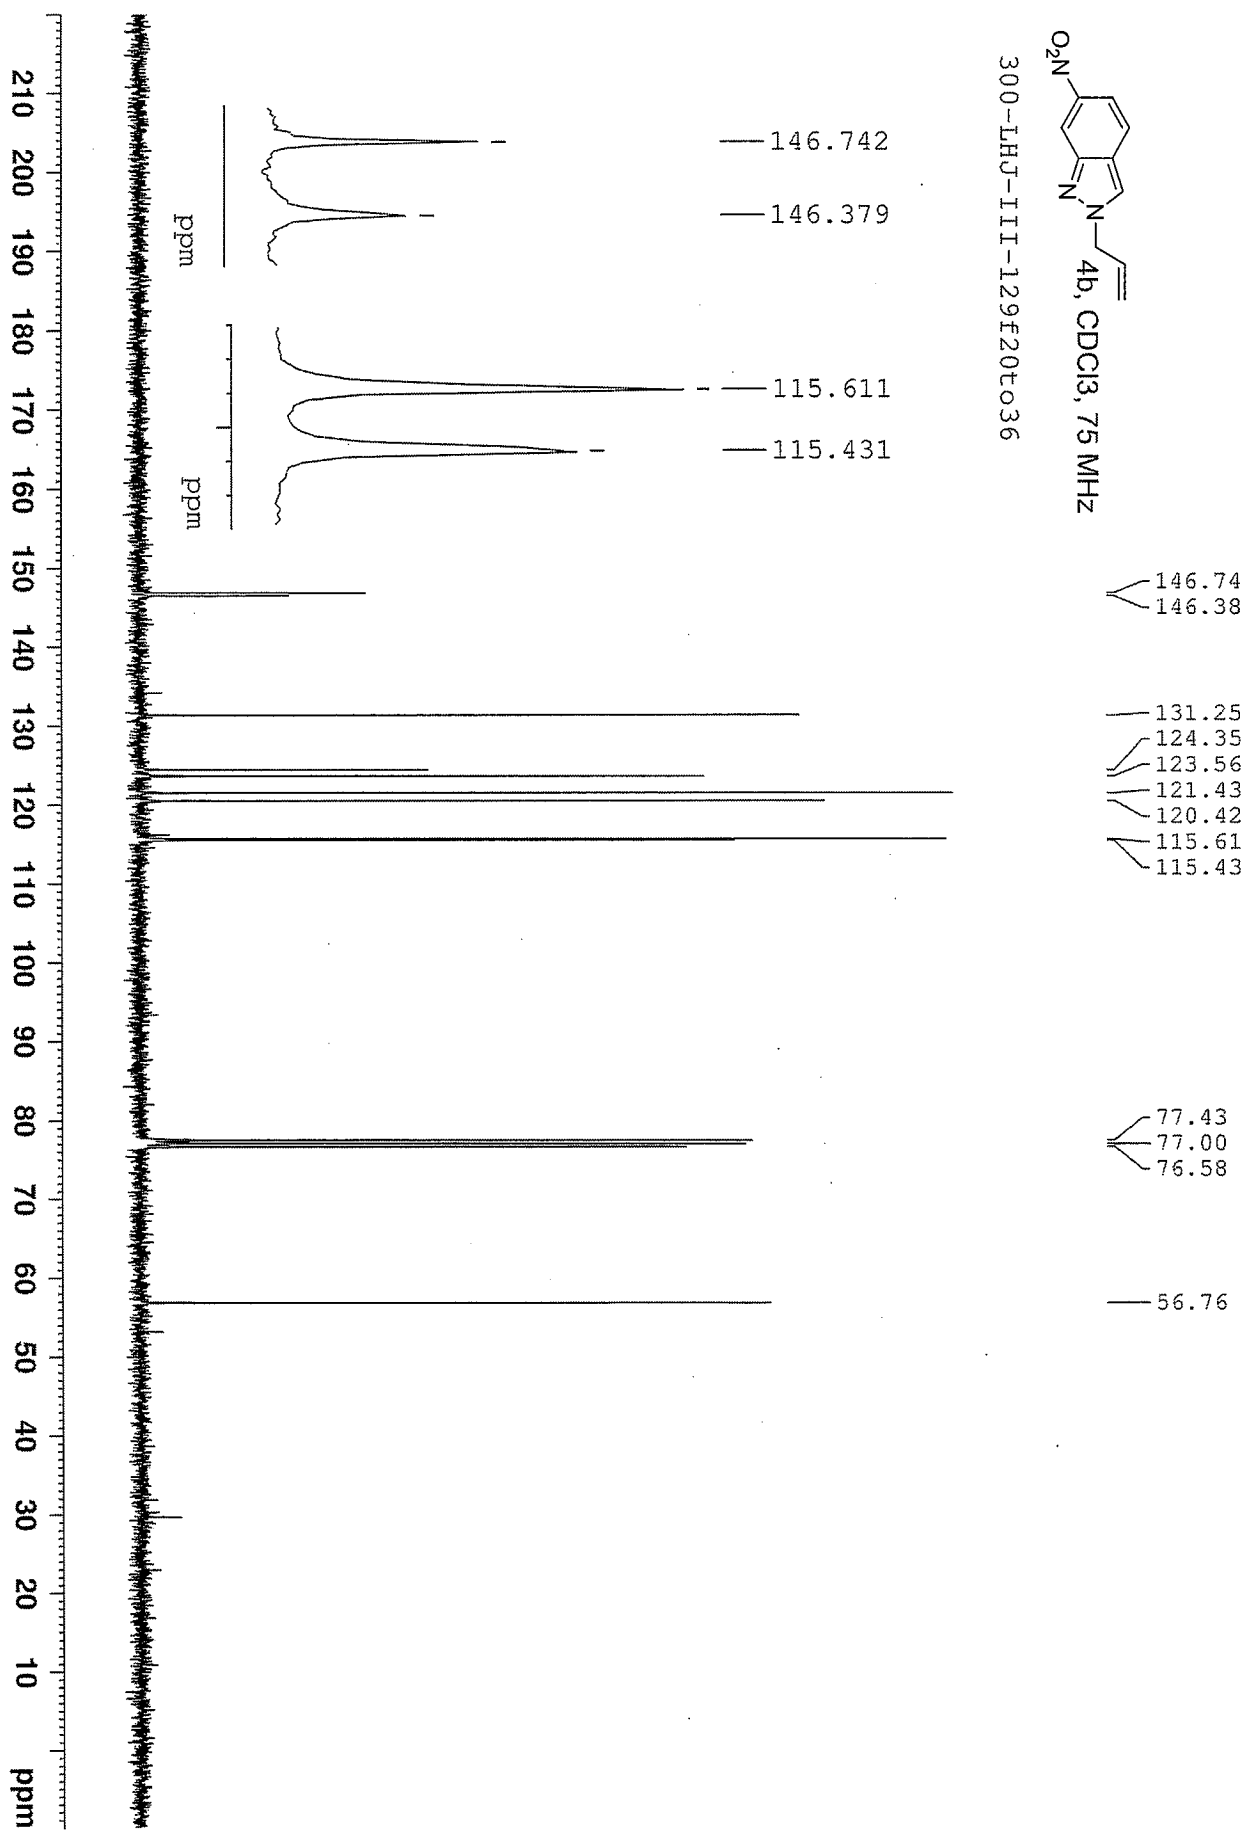

300-LHJ-III-129F22to40 (HSQC)

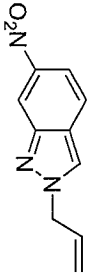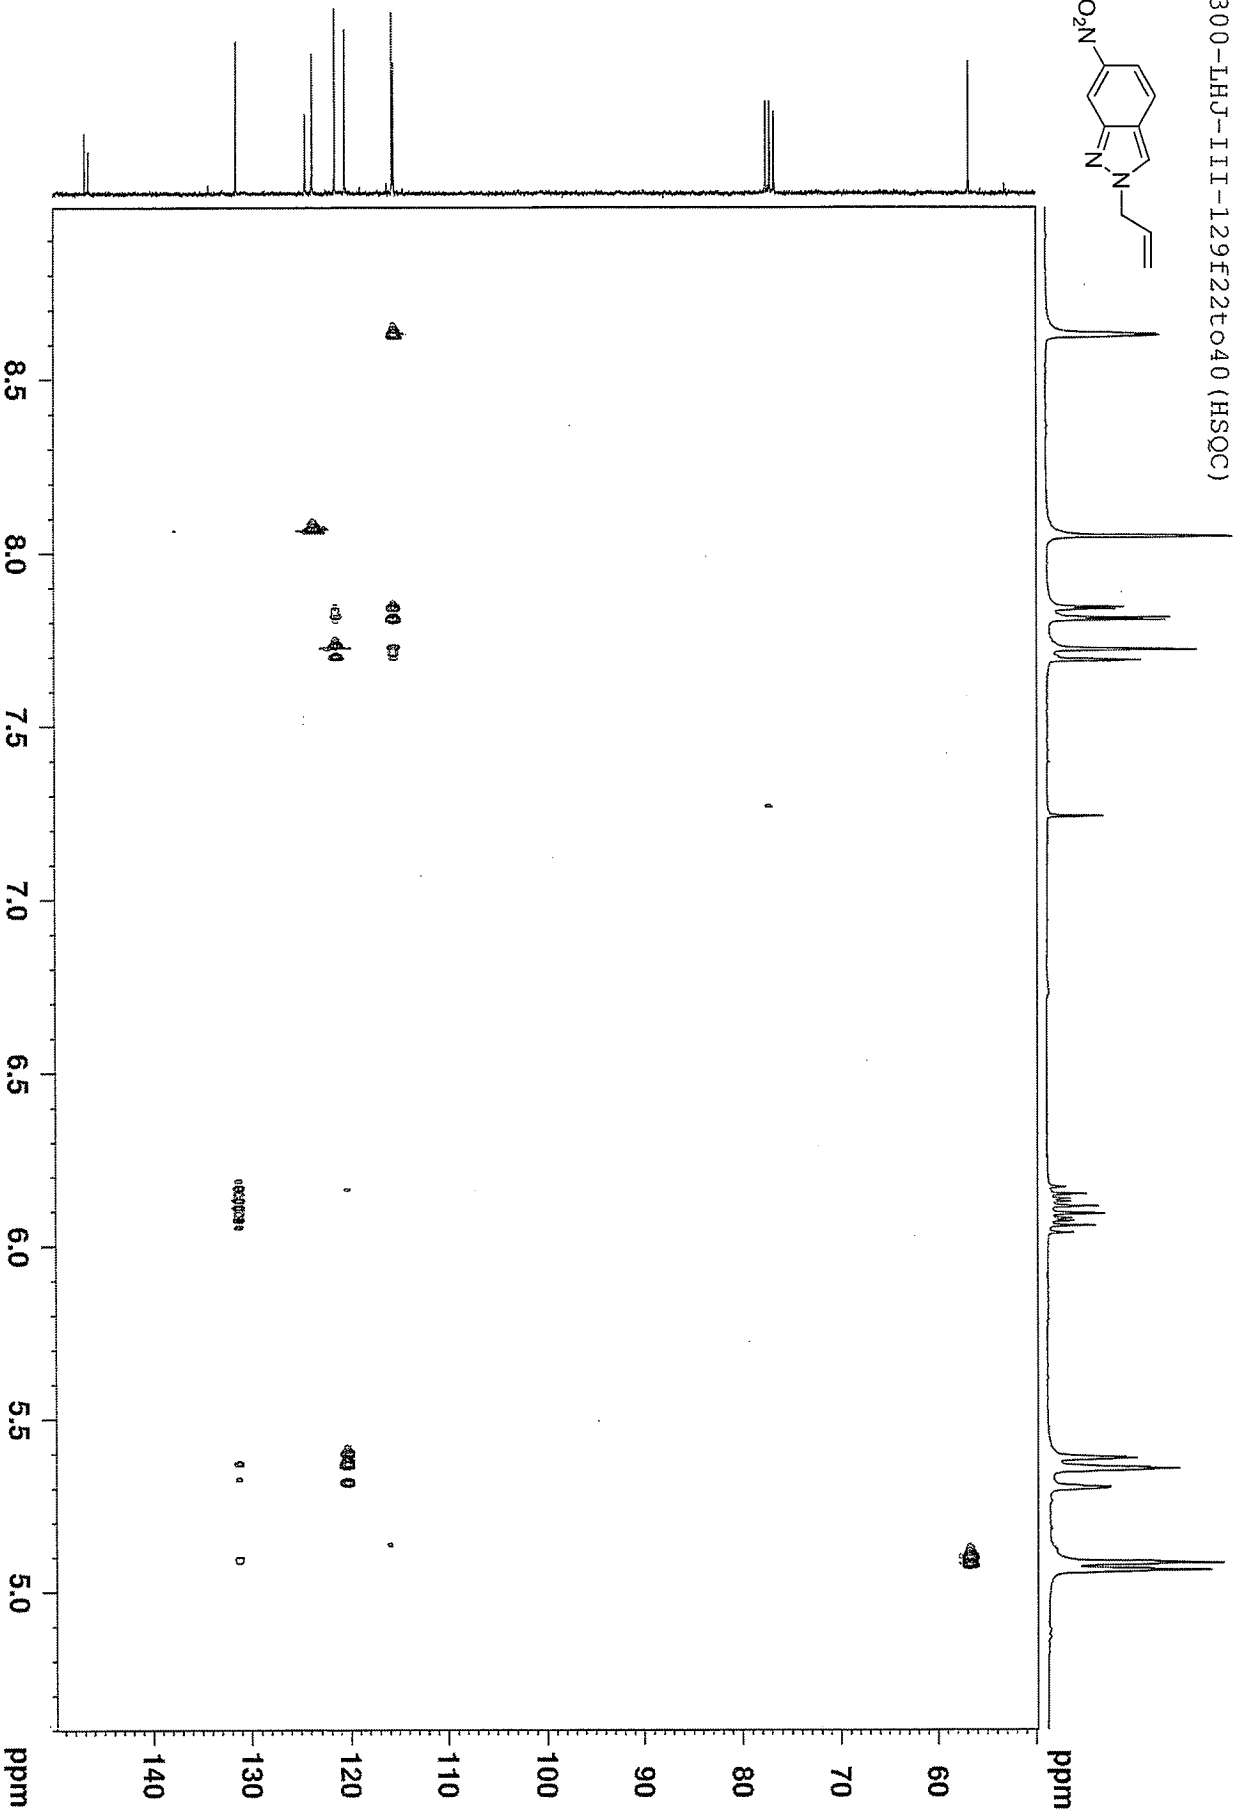

300-LHJ-III-129F22t040 (HMBC)

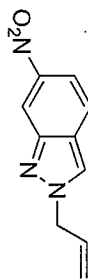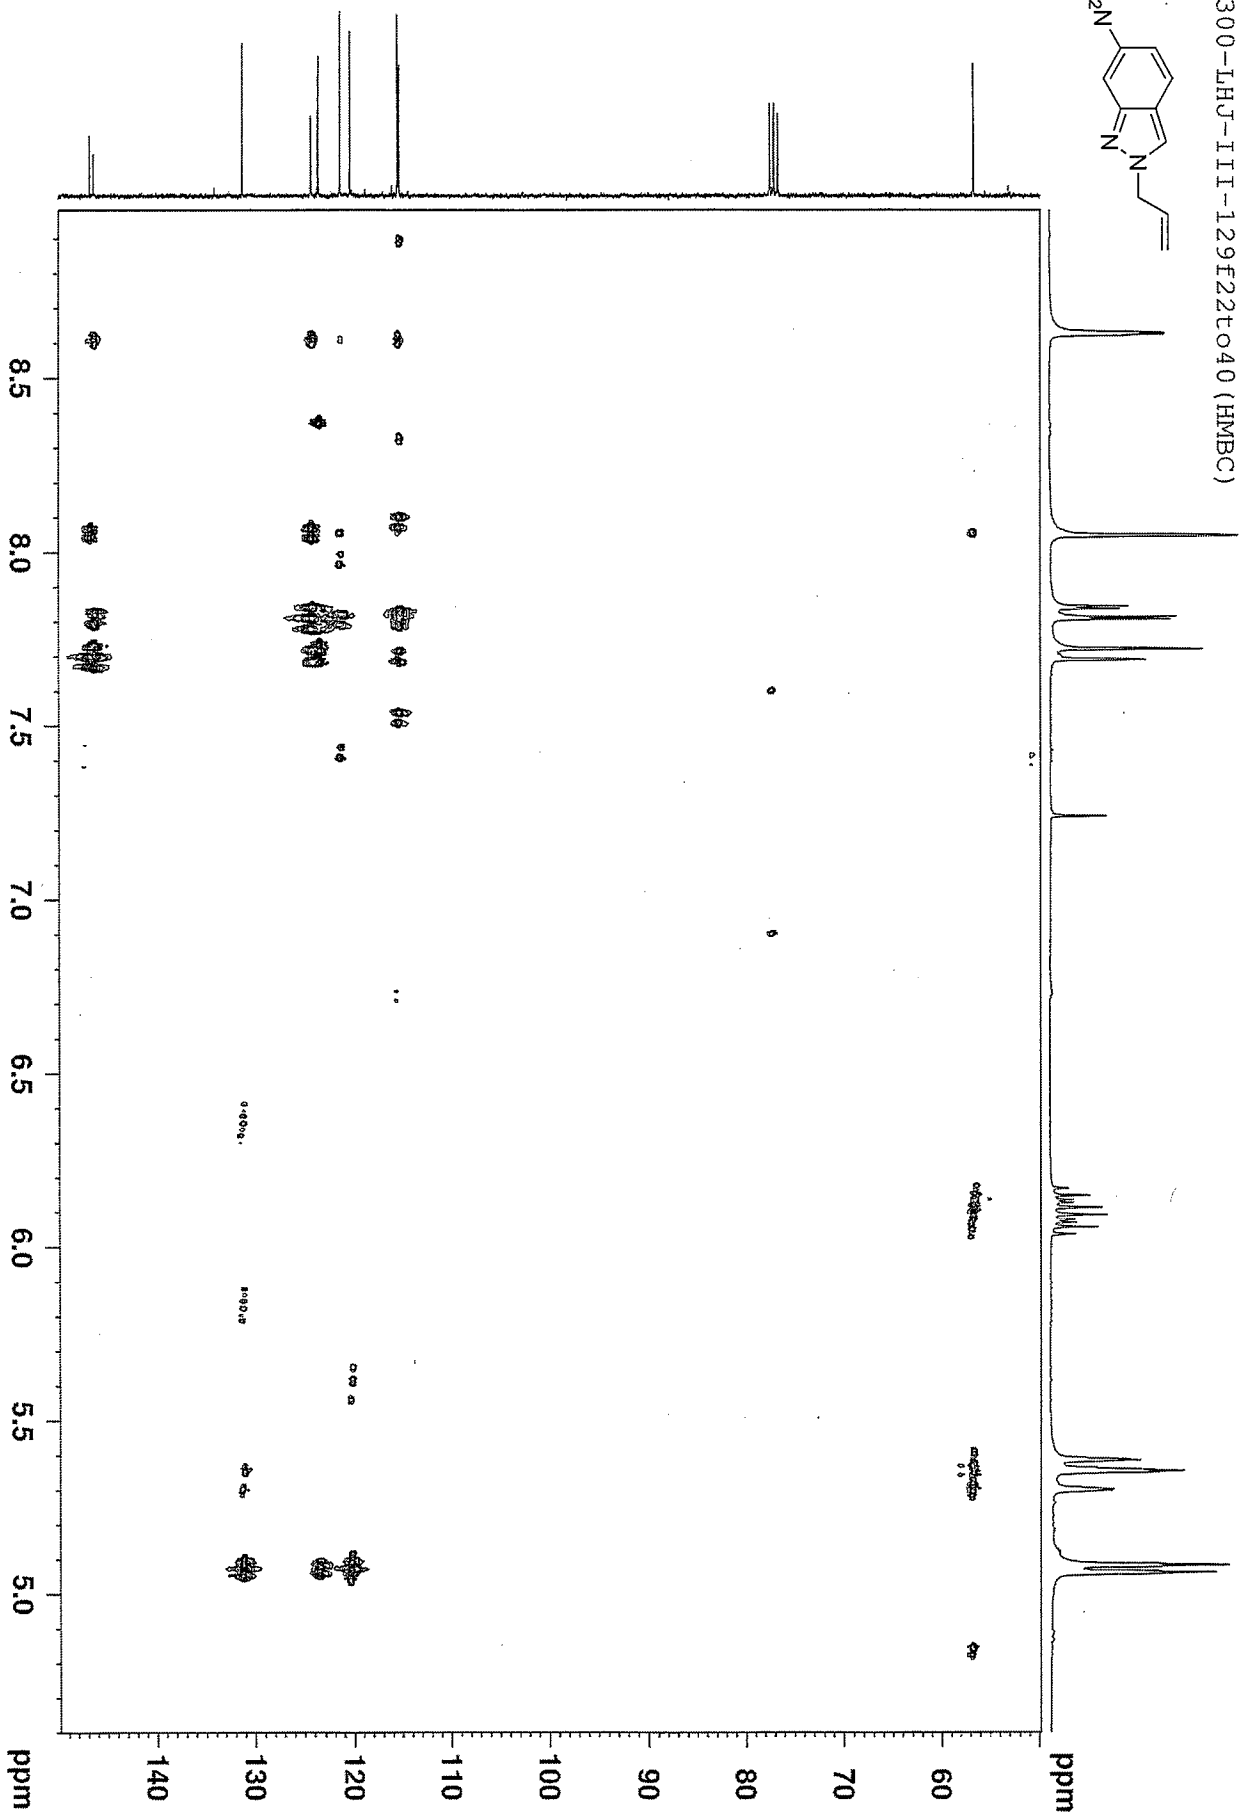

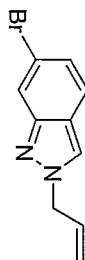

4c, CDCl<sub>3</sub>, 300 MHz

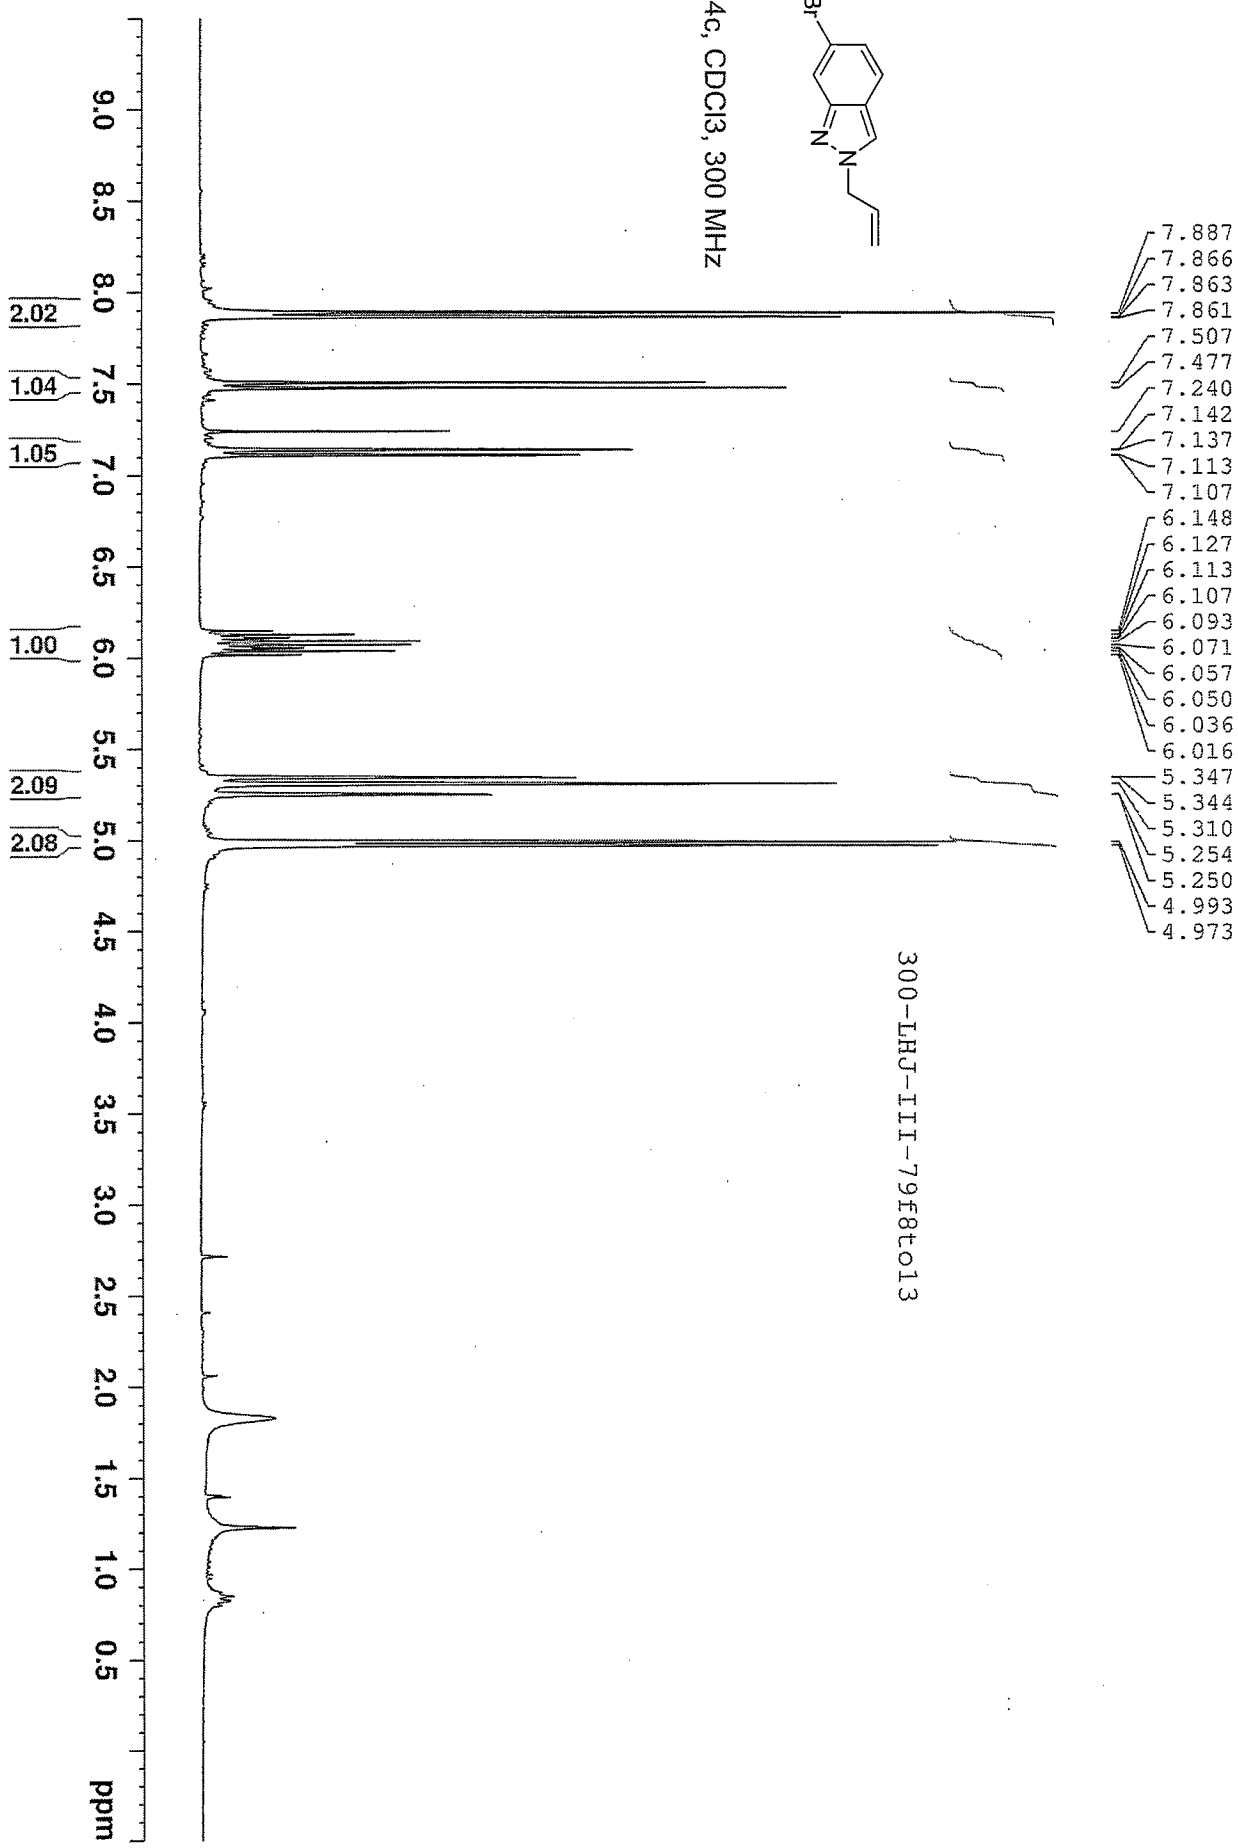

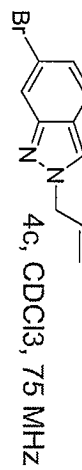

300-LHJ-III-79f8t013-2

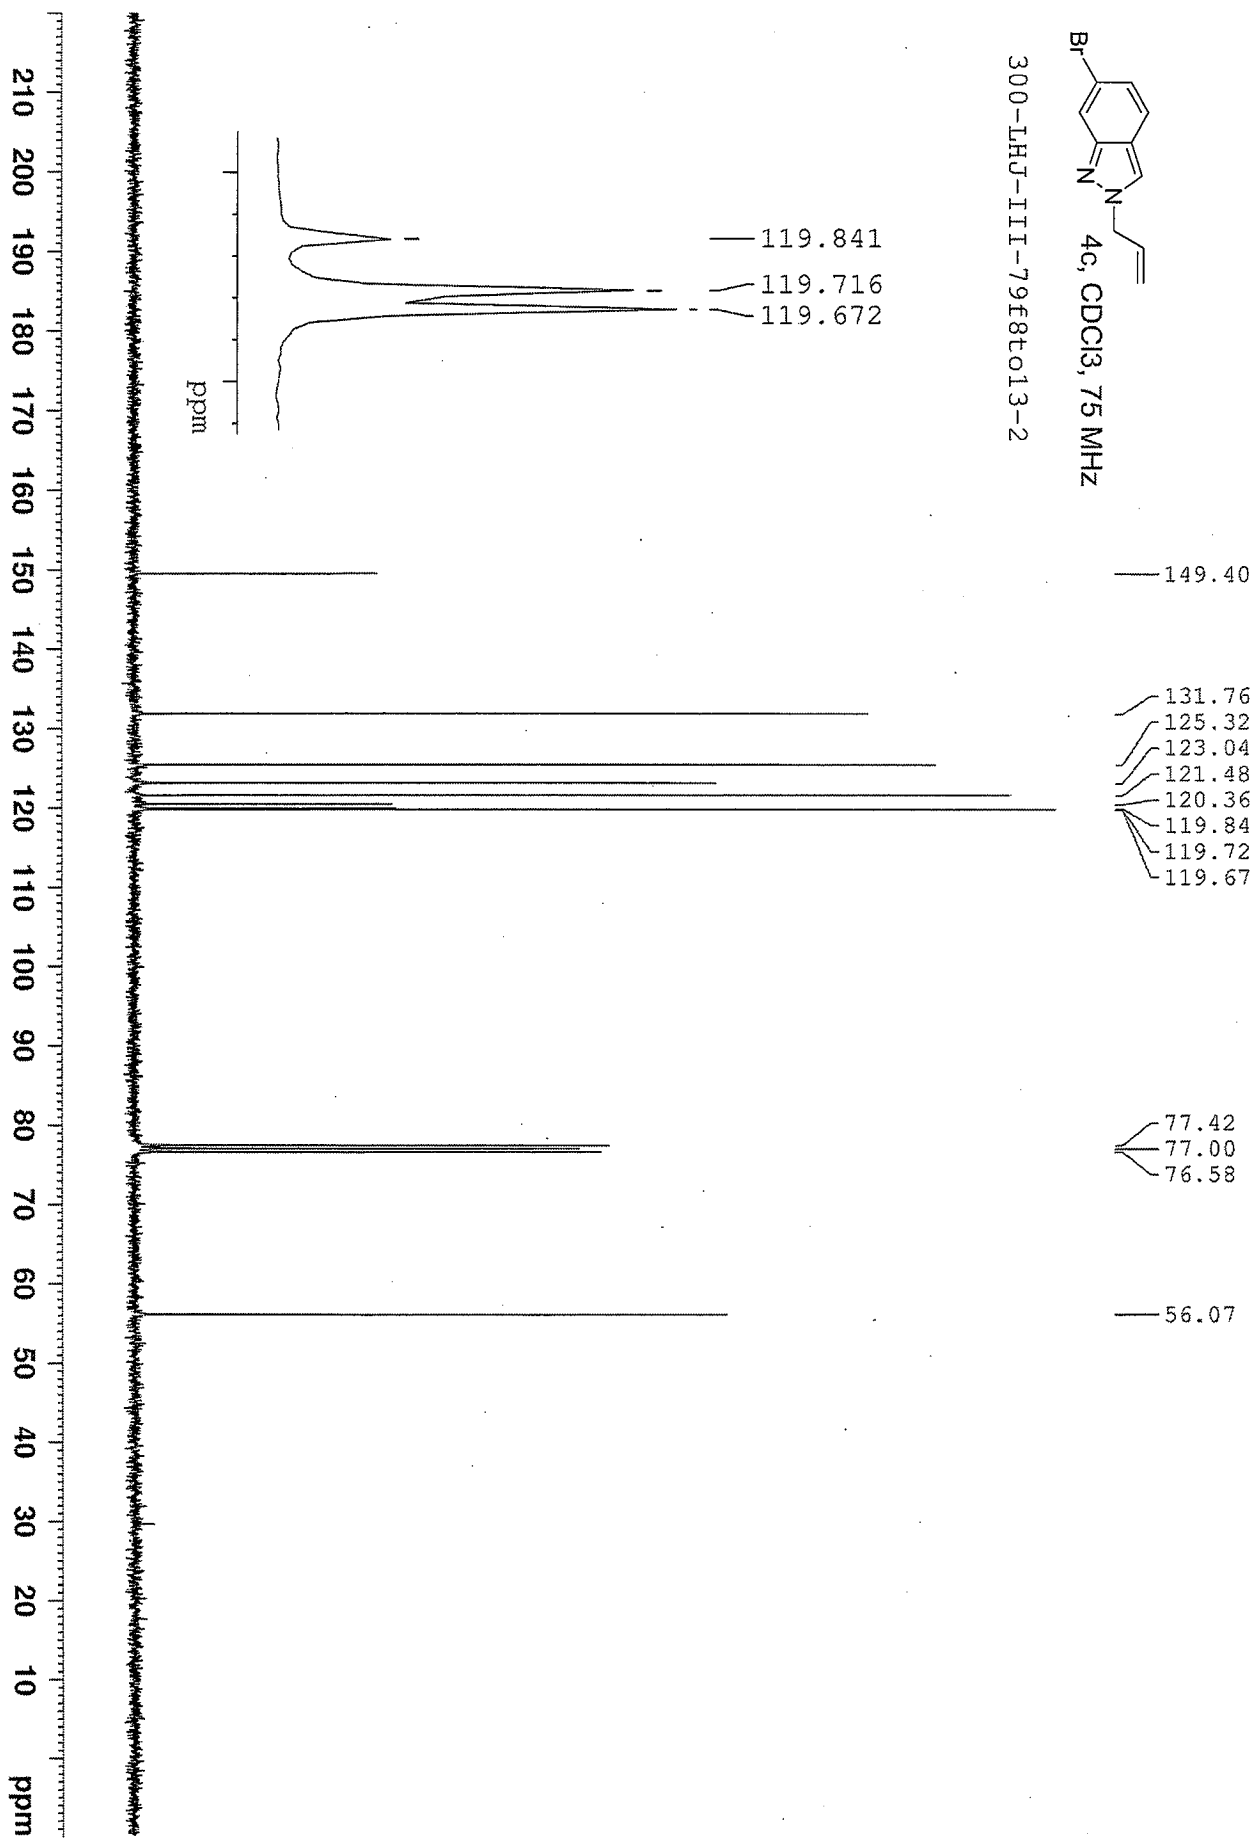

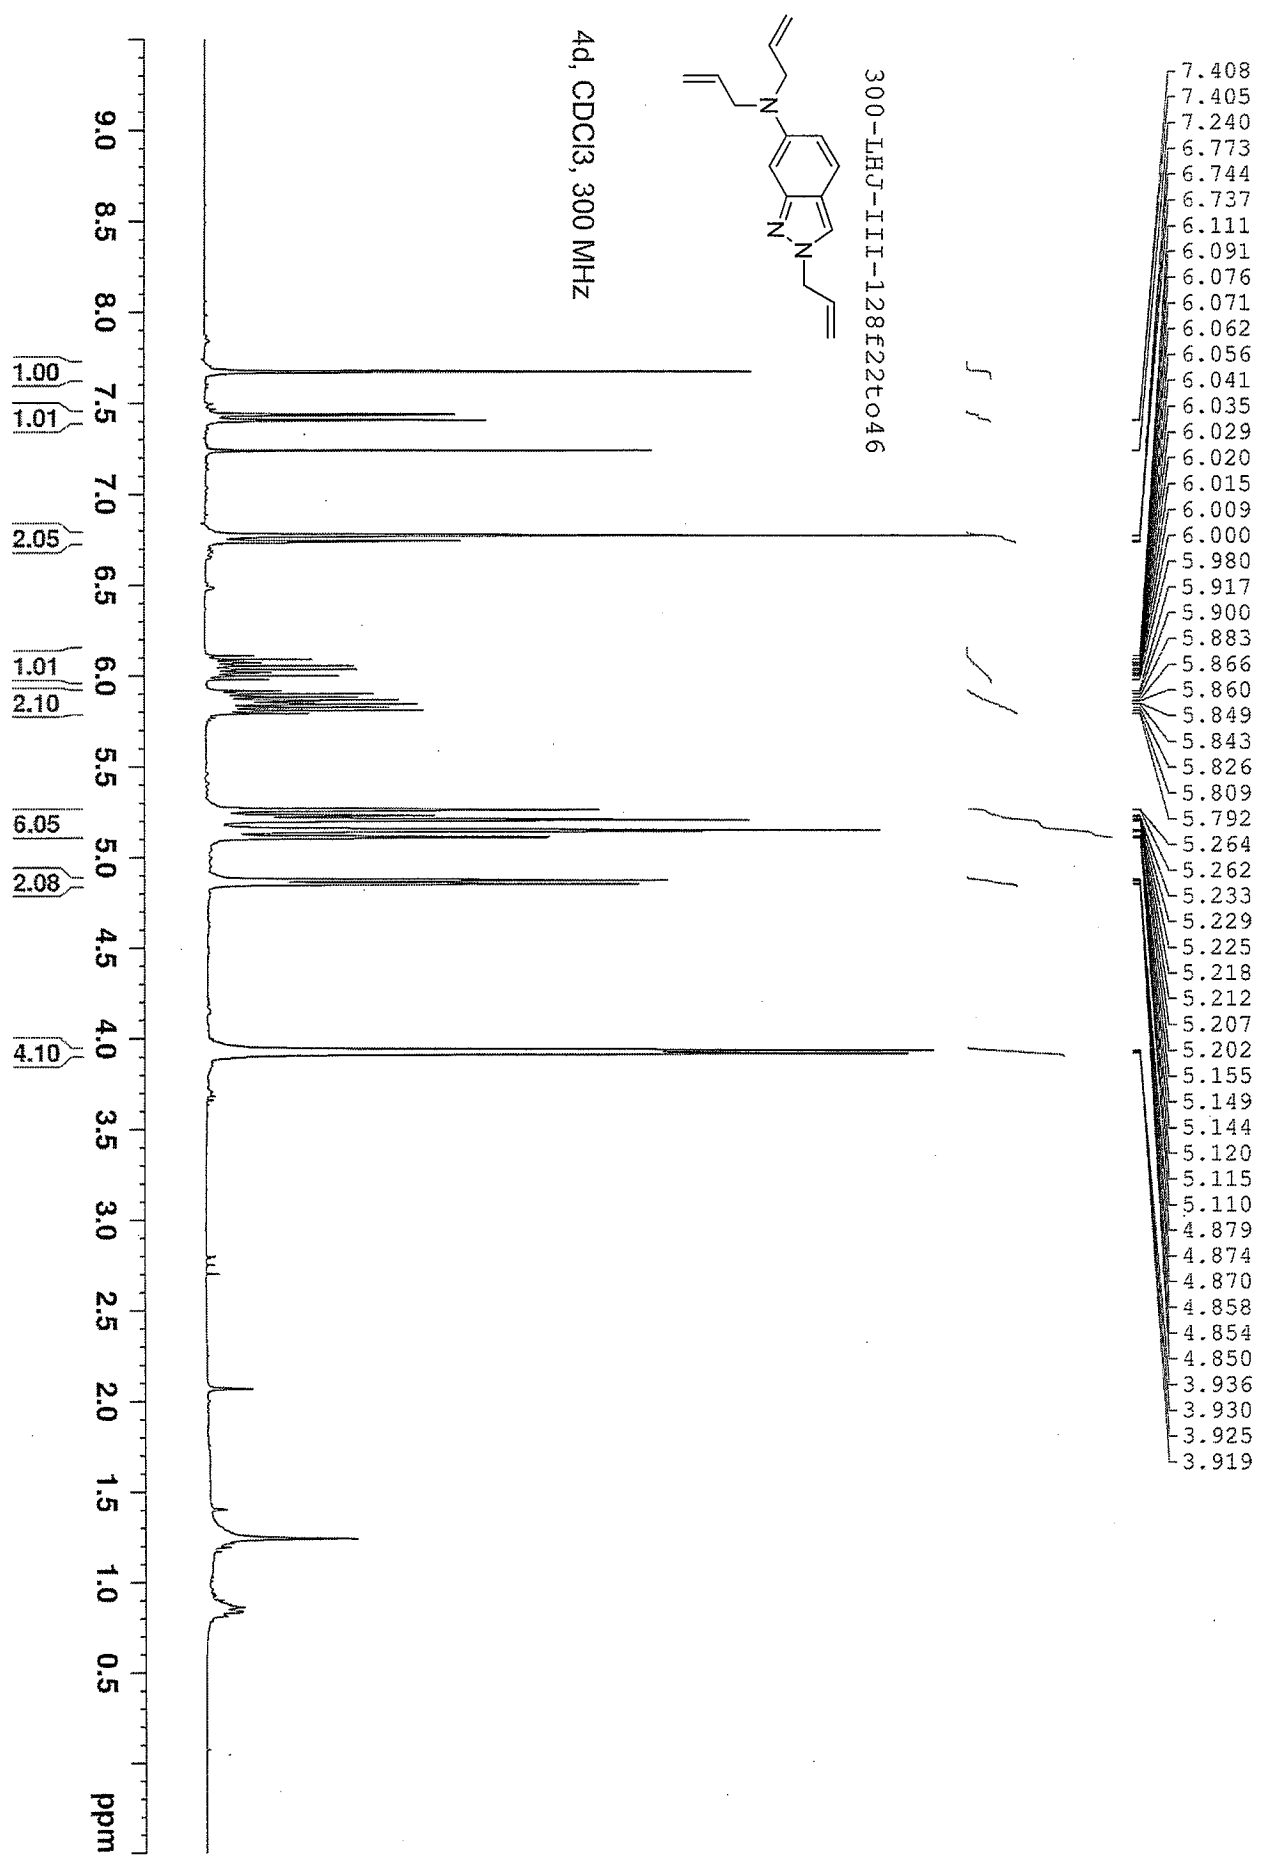

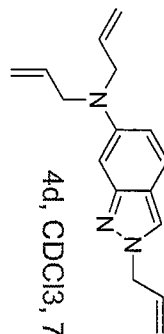

4d, CDCl<sub>3</sub>, 75 MHz

300-LHJ-III-128F22t046

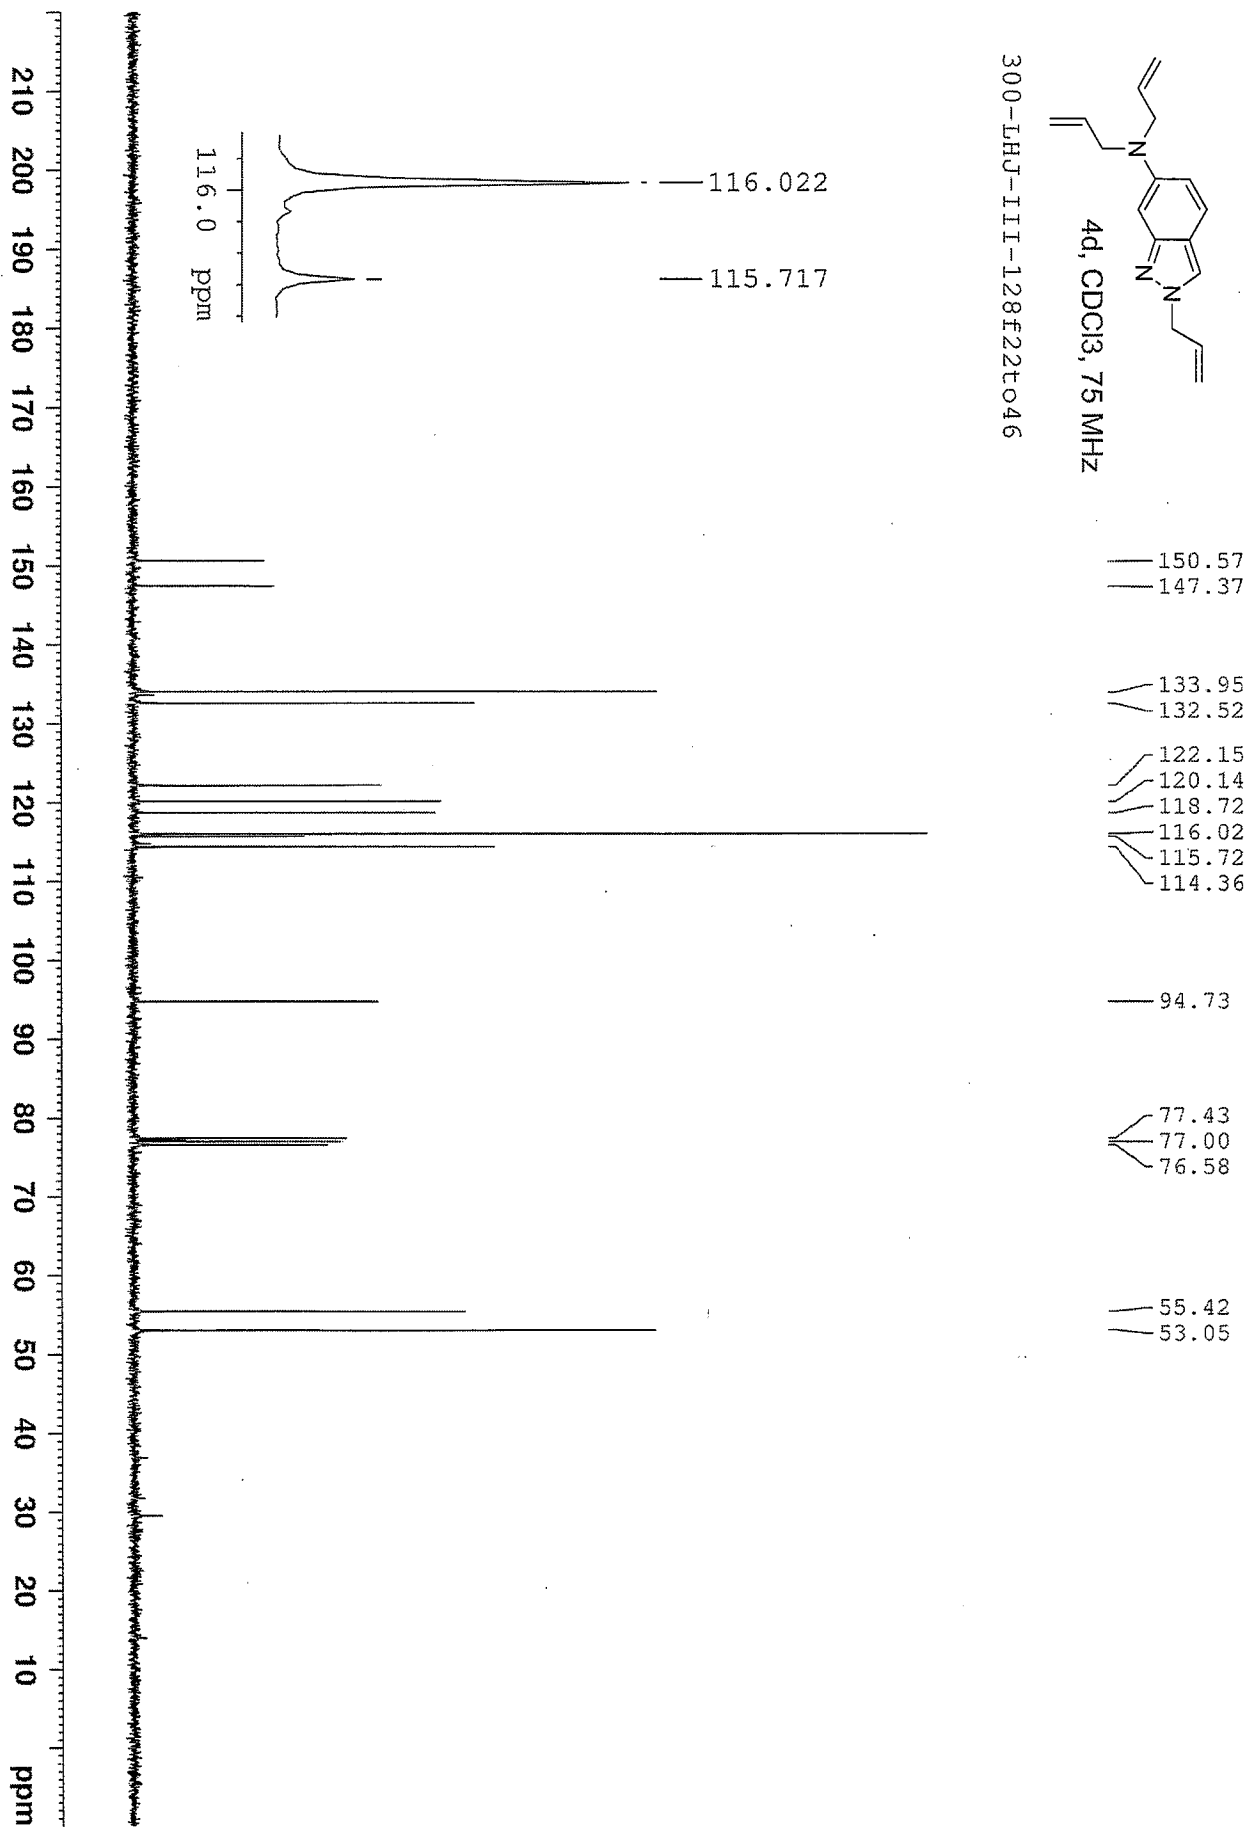



300-LHF-III-128F22E046 (HSQC)

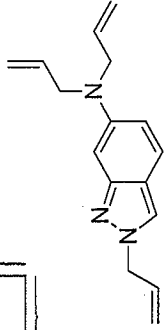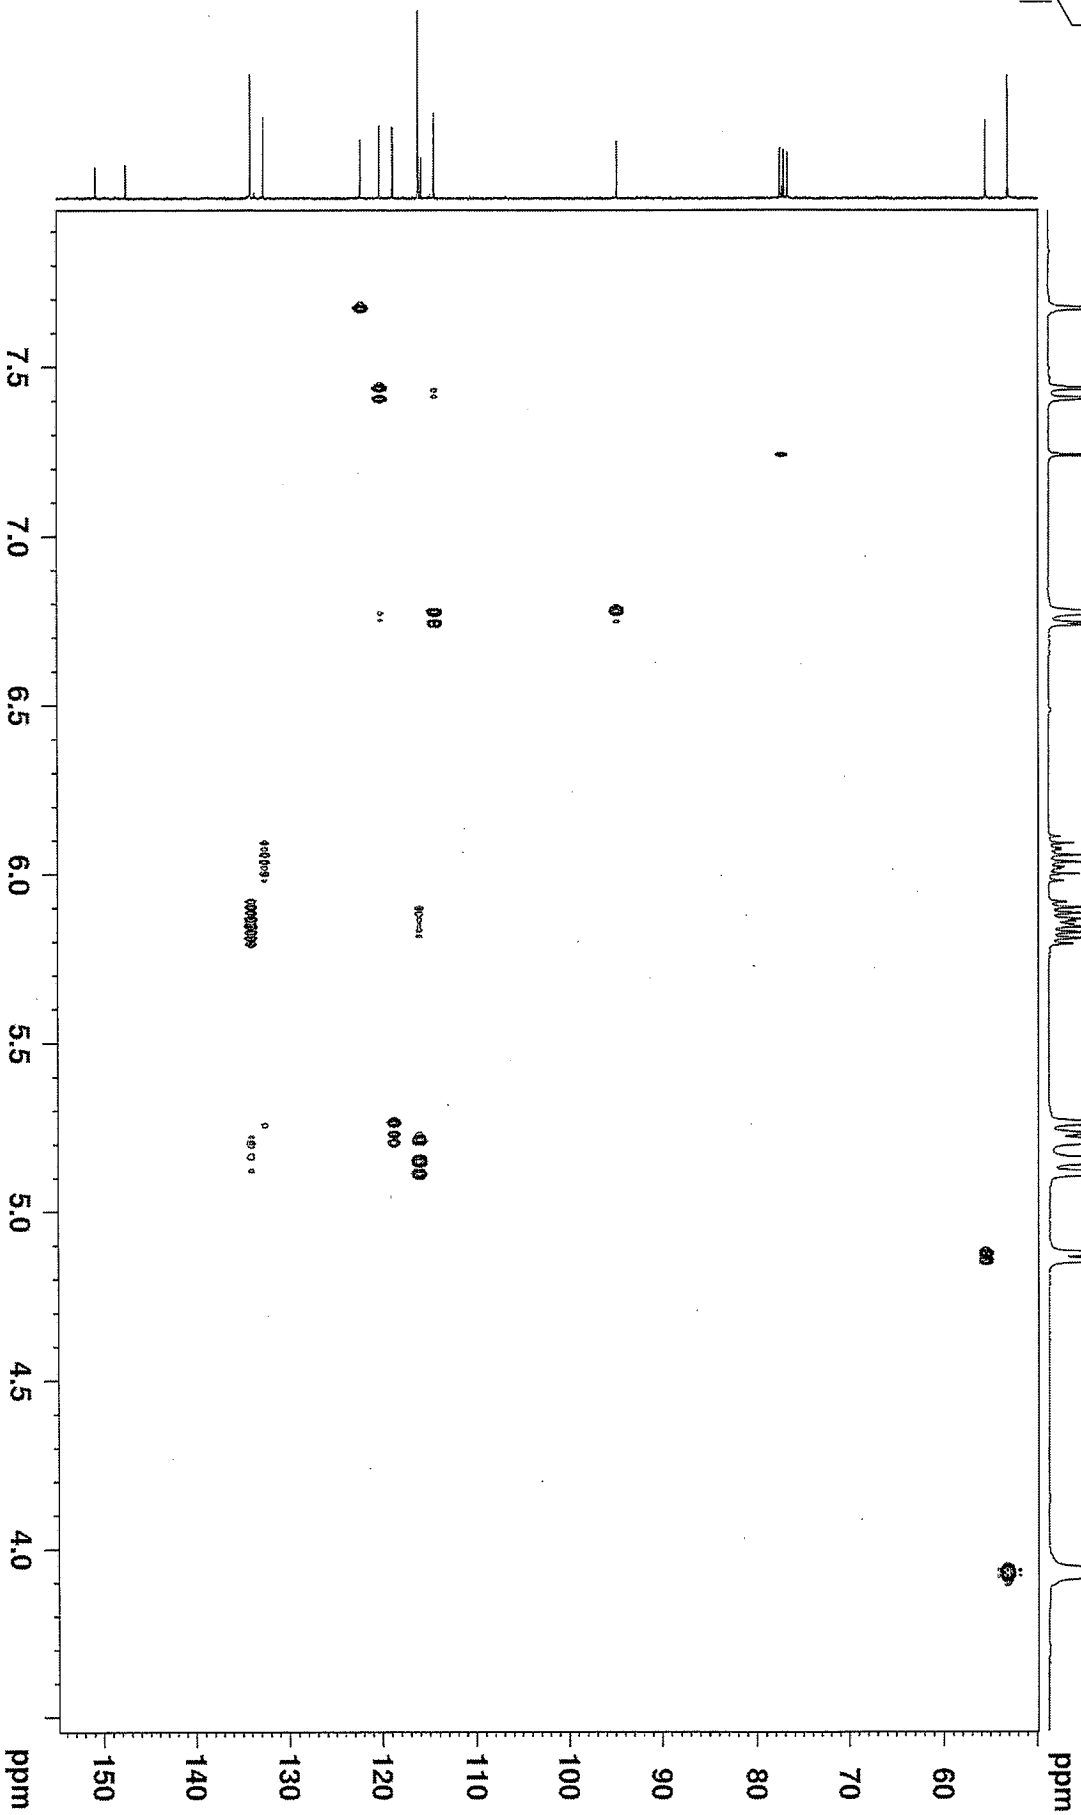

300-LHJ-III-128F22t046 (HMBC)

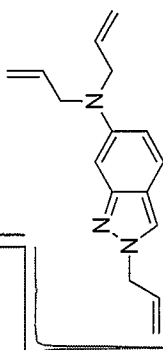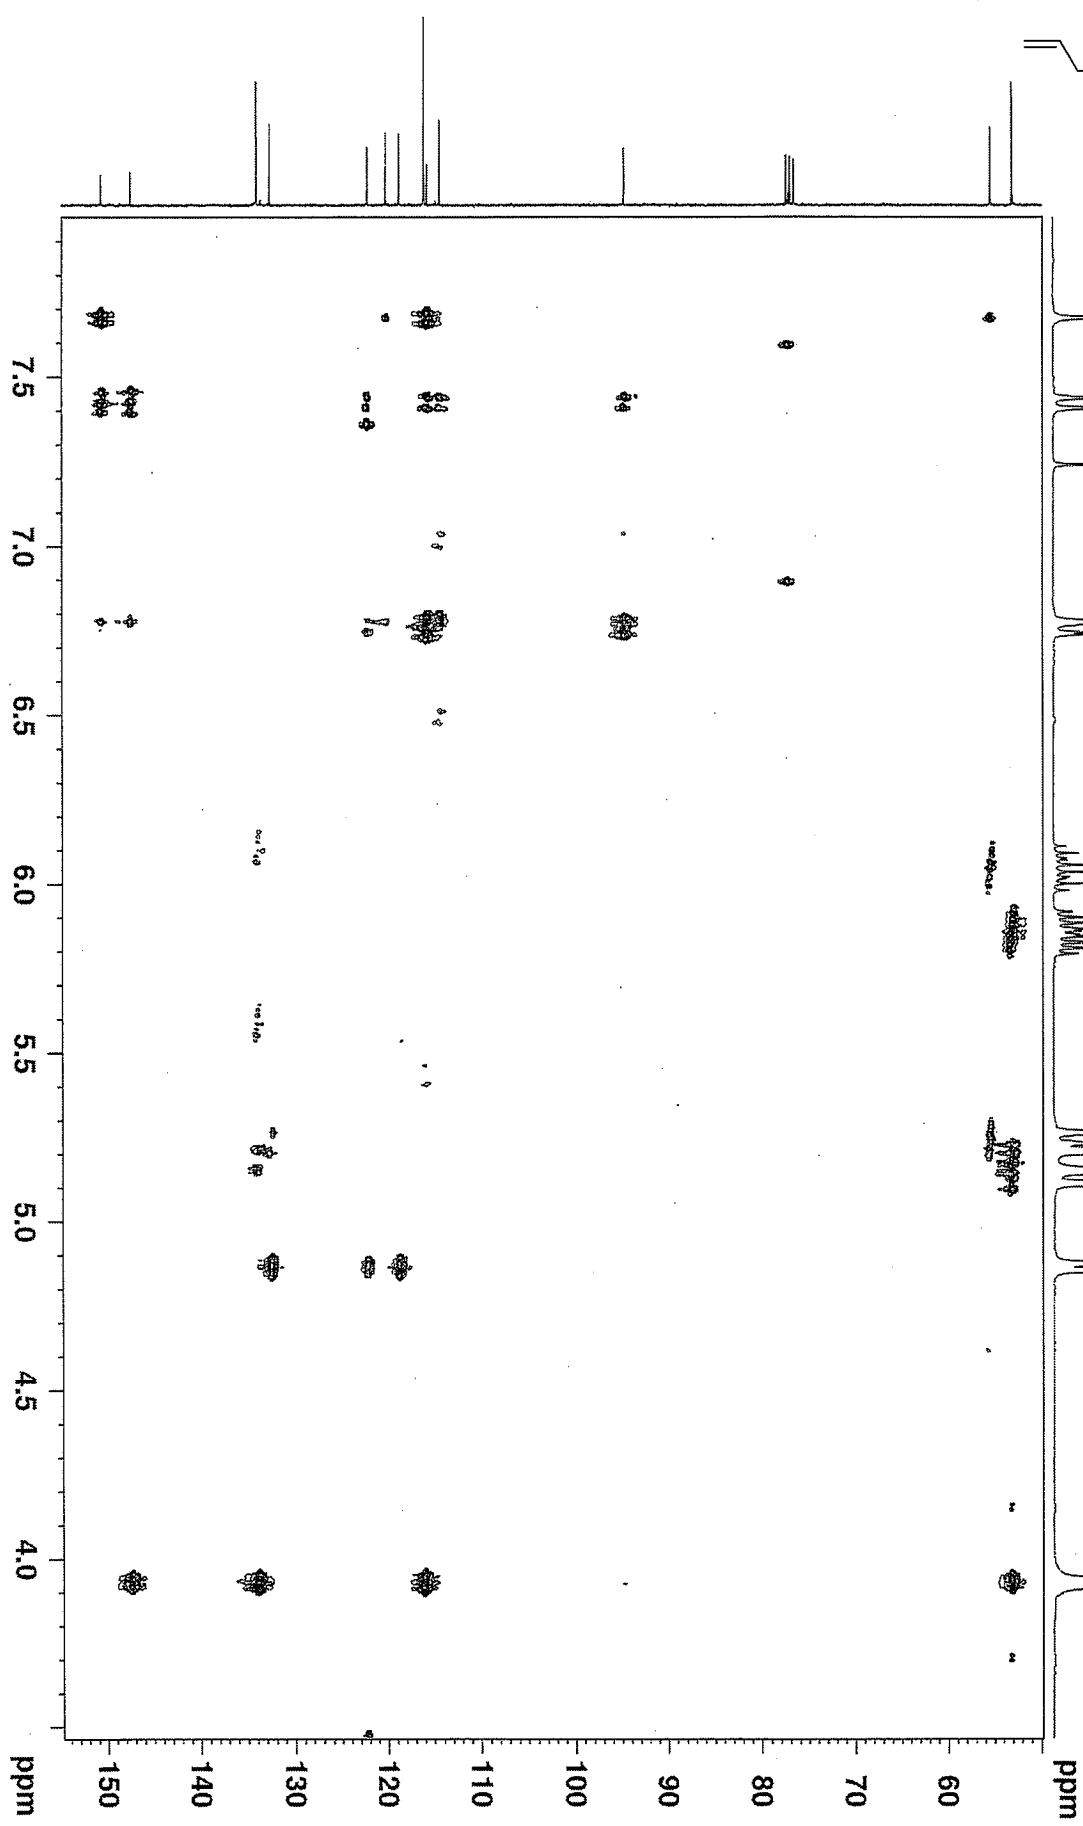

Supplement: c5ob01747e1.pdf [file c5ob01747e1.pdf]
